# Supplementary material for: ATP2A2 SINE Insertion in an Irish Terrier with Darier Disease and Associated Infundibular Cyst Formation
Source: Genes (Basel). 2020 Apr 28;11(5):481. doi: 10.3390/genes11050481 (PMC7291265; doi:10.3390/genes11050481)
Supplement: Supplementary file 1 [file genes-11-00481-s001.zip › Table_S1_public_genomes.xlsx]

## Sheet: Sheet1
Table S1. Accession numbers of 648 dog and 8 wolf genome sequences. The affected dog is highlighted in red (IT0390). The other 655 genome sequences were used as controls in variant filtering. Genotypes at the ATP2A2 SINE insertion were determined by visual inspection of the short read alignments in IGV (Chr26:8,200,944_8,200,945ins205; CanFam 3.1 assembly).
Sample ID	Breed	Study accession	Sample accession	Genotype at ATP2A2 SINE insertion	Remark
12559RE	Cane corso	PRJEB30571	SAMEA5205212	ref/ref
12675RE	Border Collie	PRJEB30571	SAMEA5205221	ref/ref
2M2	Beagle (research colony)	PRJEB16012	SAMEA5204132	ref/ref
3M2	Beagle (research colony)	PRJEB16012	SAMEA5204133	ref/ref
6455RE	Greater Swiss Mountain Dog	PRJEB16012 / PRJEB30571	SAMEA104658568 / SAMEA5205217	ref/ref
6958RE	Border Collie	PRJEB30571	SAMEA5205222	ref/ref
6F4	Beagle (research colony)	PRJEB16012	SAMEA5204134	ref/ref
7F1	Beagle (research colony)	PRJEB16012	SAMEA5204135	ref/ref
AC023	Australian Cattle Dog	PRJEB16012	SAMEA104091560	ref/ref
AC0258	Australian Cattle Dog	PRJEB16012	SAMEA5657396	ref/ref
AC046	Australian Cattle Dog	PRJEB16012	SAMEA104283464	ref/ref
AC065	Australian Cattle dog	PRJEB13468	SAMEA3928139	ref/ref
AC108	Australian Cattle dog	PRJEB16012	SAMEA4504820	ref/ref
AC364	Australian Cattle Dog	PRJEB16012	SAMEA104500413	ref/ref
AD009	Alpine Dachsbracke	PRJEB14840	SAMEA4346711	ref/ref
AD034	Alpine Dachsbracke	PRJEB16012	SAMEA4848713	ref/ref
AM007	Alaskan Malamute	PRJEB16012	SAMEA104091571	ref/ref
AM019	Alaskan Malamute	PRJEB16012	SAMEA4848707	ref/ref
AR001	Australian Terrier	PRJEB16012	SAMEA4504840	ref/ref
AS006	American Staffordshire Terrier	PRJEB16012	SAMEA4504831	ref/ref
AS008	American Staffordshire Terrier	PRJEB16012	SAMEA4867927	ref/ref
AS011	American Staffordshire Terrier	PRJEB16012	SAMEA6249480	ref/ref
AU178	Australian Shepherd	PRJEB16012	SAMEA104283461	ref/ref
AU184	Australian Shepherd	PRJEB16012	SAMEA4867934	ref/ref
BB011	White Shepherd	PRJEB16012	SAMEA4506887	ref/ref
BC0480	Border Collie	PRJEB16012	SAMEA104091558	ref/ref
BC1028	Border Collie	PRJNA319610	SRR3466766	ref/ref
BC1029	Border Collie	PRJNA319610	SRR3466767	ref/ref
BC1893	Bearded Collie	PRJEB28877	SAMEA4949388	ref/ref
BC1895	Bearded Collie	PRJEB28877	SAMEA4949389	ref/ref
BC1896	Bearded Collie	PRJEB28877	SAMEA4949390	ref/ref
BC222	Border Collie	PRJNA319610	SRR3466763	ref/ref
BC272	Border Collie	PRJEB4544 / PRJNA188158	SAMEA2177732 / SAMN01908107	ref/ref
BC273	Border Collie	PRJEB16012	SAMEA4505490	ref/ref
BC387	Border Collie	PRJNA319610	SRR3466764	ref/ref
BC485	Border Collie	PRJEB16012	SAMEA104125112	ref/ref
BC518	Border Collie	PRJEB16012	SAMEA104125113	ref/ref
BC547	Border Collie	PRJEB30571	SAMEA5205229	ref/ref
BC548	Border Collie	PRJEB30571	SAMEA5205228	ref/ref
BC549	Border Collie	PRJEB30571	SAMEA5205227	ref/ref
BC555	Border Collie	PRJEB16012	SAMEA104125114	ref/ref
BC578	Border Collie	PRJNA319610	SRR3466765	ref/ref
BC597	Border Collie	PRJEB16012	SAMEA104125115	ref/ref
BC604__BC_24093	Border Collie	PRJEB12337	ERR1210832	ref/ref
BC621	Border Collie	PRJEB16012	SAMEA4867922	ref/ref
BC655	Border Collie	PRJEB16012	SAMEA5657397	ref/ref
BD016	Bearded Collie	PRJEB13468	SAMEA3928140	ref/ref
BD036	Bearded Collie	PRJEB16012	SAMEA4505492	ref/ref
BD052	Bearded Collie	PRJEB16012	SAMEA4504824	ref/ref
BD085	Bearded Collie	PRJEB16012	SAMEA4505493	ref/ref
BD089	Bearded Collie	PRJEB16012	SAMEA4504827	ref/ref
BD091	Bearded Collie	PRJEB16012	SAMEA4505496	ref/ref
BD093	Bearded Collie	PRJEB16012	SAMEA4504832	ref/ref
BD098	Bearded Collie	PRJEB16012	SAMEA4504839	ref/ref
BE020	Beagle	PRJEB5500	SAMEA2376414	not determined
BF21	Bichon Frisé	PRJEB16012	SAMEA5059512	not determined
BF39	Bichon Frisé	PRJEB16012	SAMEA5059513	not determined
BG064	Bavarian Hound (Bayerischer Gebirgsschweisshund)	PRJEB16012	SAMEA104091562	ref/ref
BH003	Basset Hound	PRJEB16012	SAMEA4509488	ref/ref
BH005_SEA04046	Basset Hound	PRJEB16012	SAMEA5209170	not determined
BI005_HCS01268	Brussels Griffon	PRJEB16012	SAMEA5209171	not determined
BI006_HCS01271	Brussels Griffon	PRJEB16012	SAMEA5209172	not determined
BJ001	Basenji	PRJEB16012	SAMEA104283473	ref/ref
BJ002	Basenji	PRJEB16012	SAMEA104283472	ref/ref
BJ003	Basenji	PRJEB16012	SAMEA104283471	ref/ref
BJ004	Basenji	PRJEB16012	SAMEA104283470	ref/ref
BJ005	Basenji	PRJEB16012	SAMEA104283469	ref/ref
BJ006	Basenji	PRJEB16012	SAMEA104283468	ref/ref
BS2168	Bernese Mountain Dog	PRJEB16012	SAMEA6249477	ref/ref
BT007	Miniature Bull terrier	PRJEB16012	SAMEA4506897	ref/ref
BT012	Bull Terrier	PRJEB16012	SAMEA104125116	ref/ref
BT134	Bull Terrier	PRJEB16012	SAMEA6249481	ref/ref
BU002	Bullmastiff	PRJEB16012	SAMEA103949042	ref/ref
BX002	Dogue de Bordeaux	PRJEB30571	SAMEA5205223	ref/ref
BX003	Dogue de Bordeaux	PRJEB30571	SAMEA5205224	ref/ref
BY010	Berger des Pyrénées	PRJEB16012	SAMEA6249482	ref/ref
BY014	Berger des Pyrénées	PRJEB16012	SAMEA6249483	ref/ref
BY015	Berger des Pyrénées	PRJEB16012	SAMEA6249484	ref/ref
CE073	Cairn Terrier	PRJEB16012	SAMEA104091555	ref/ref
CH019	Chihuahua (without pedigree)	PRJEB13139	SAMEA3905753	ref/ref
CH022_LCR05127	Chihuahua Smooth Coat	PRJEB16012	SAMEA5209173	not determined
CH023_LCR05128	Chihuahua Smooth Coat	PRJEB16012	SAMEA5209174	not determined
CH027	Chihuahua	PRJEB16012	SAMEA4848714	ref/ref
CH030	Chihuahua	PRJEB16012	SAMEA6249485	ref/ref
CI001	Cane corso	PRJEB30571	SAMEA5205213	ref/ref
CI002	Cane corso	PRJEB30571	SAMEA5205214	ref/ref
CI003	Cane corso	PRJEB30571	SAMEA5205215	ref/ref
CI004	Cane corso	PRJEB30571	SAMEA5205216	ref/ref
CI005	Cane Corso	PRJEB16012	SAMEA6249478	ref/ref
CK006	Cavalier King Charles Spaniel	PRJEB16012	SAMEA104091570	ref/ref
CK023	Cavalier King Charles Spaniel	PRJEB16012	SAMEA104091569	ref/ref
CL013	Collie	PRJEB16012	SAMEA4867926	ref/ref
CP003	Cocker Spaniel	PRJEB16012	SAMEA4506900	ref/ref
CP010_SEA04160	English Cocker Spaniel	PRJEB16012	SAMEA5209204	not determined
CR018	Curly Coated Retriever	PRJEB16012	SAMEA4867931	ref/ref
CR023	Curly Coated Retriever	PRJEB16012	SAMEA4867930	ref/ref
CR039	Curly Coated Retriever	PRJEB16012	SAMEA104091556	ref/ref
CR040	Curly Coated Retriever	PRJEB16012	SAMEA4848709	ref/ref
CR101	Curly Coated Retriever	PRJEB16012	SAMEA4848710	ref/ref
CW011	Chow Chow	PRJEB16012	SAMEA104091566	ref/ref
DAL162K1	Dalmatian dog	PRJNA360671	SRR5161902	ref/ref
DD116	Great Dane	PRJEB16012	SAMEA104091557	ref/ref
DH0117	Dachshund	PRJEB16012	SAMEA104091567	ref/ref
DH098	Dachshund	PRJEB7736	SAMEA3121338	ref/ref
DH126	Dachshund	PRJEB16012	SAMEA104125117	ref/ref
DH136_SEA04054	Dachshund (Miniature Longhaired)	PRJEB16012	SAMEA5209175	not determined
DH137_SEA04056	Dachshund (Miniature Longhaired)	PRJEB16012	SAMEA5209176	not determined
DK008	German Shorthair Pointer	PRJEB16012	SAMEA5657398	ref/ref
DK398	German Shorthair Pointer	PRJEB16012	SAMEA6249504	ref/ref
DO159	Doberman Pinscher	PRJEB16012	SAMEA4509491	ref/ref
DO242	Doberman Pinscher	PRJEB16012	SAMEA4505489	ref/ref
DO263	Doberman Pinscher	PRJEB16012	SAMEA4509492	ref/ref
DO665	Doberman Pinscher	PRJEB16012	SAMEA6249486	ref/ref
DQ1	Chinese Indigenous Dog	PRJNA266585		ref/ref
DQ10	Chinese Indigenous Dog	PRJNA266585		ref/ref
DQ2	Chinese Indigenous Dog	PRJNA266585		ref/ref
DQ3	Chinese Indigenous Dog	PRJNA266585		ref/ref
DQ4	Chinese Indigenous Dog	PRJNA266585		ref/ref
DQ5	Chinese Indigenous Dog	PRJNA266585		ref/ref
DQ6	Chinese Indigenous Dog	PRJNA266585		ref/ref
DQ7	Chinese Indigenous Dog	PRJNA266585		ref/ref
DQ8	Chinese Indigenous Dog	PRJNA266585		ref/ref
DQ9	Chinese Indigenous Dog	PRJNA266585		ref/ref
DS032	Mixed breed	PRJEB14110	SAMEA3994036	ref/ref
DS041	Mixed breed	PRJEB14110	SAMEA3994037	ref/ref
DS042	Mixed breed	PRJEB14110	SAMEA3994038	ref/ref
DS043	German Shepherd	PRJEB16012	SAMEA4506895	ref/ref
DS051	German Shepherd	PRJEB16012	SAMEA72802168	not determined
DS053	German Shepherd	PRJEB16012	SAMEA72802918	ref/ref
DS064	German Shepherd	PRJEB16012	SAMEA104283465	ref/ref
DS077	German Shepherd	PRJEB16012	SAMEA5657392	ref/ref
EB003	English Bulldog	PRJEB16012	SAMEA4848708	ref/ref
EL565	Elo	PRJEB16012	SAMEA4506890	ref/ref
EM003	Mastiff	PRJEB16012	SAMEA6249487	ref/ref
EN091	Entlebucher Mountain Dog	PRJEB16012	SAMEA4504828	ref/ref
EN154	Entlebucher Mountain Dog	PRJEB16012	SAMEA4505497	ref/ref
EN221	Entlebucher Mountain Dog	PRJEB16012	SAMEA4504829	not determined
EN247	Entlebucher Mountain Dog	PRJEB16012	SAMEA4505498	ref/ref
EN261	Entlebucher Mountain Dog	PRJEB16012	SAMEA4504830	ref/ref
EN262	Entlebucher Mountain Dog	PRJEB16012	SAMEA4505499	not determined
EN263	Entlebucher Mountain Dog	PRJEB16012	SAMEA4505500	ref/ref
EN264	Entlebucher Mountain Dog	PRJEB16012	SAMEA4505501	ref/ref
EU008	Eurasier	PRJEB6079	SAMEA2446720	not determined
EU035	Eurasier	PRJEB16012	SAMEA4506889	ref/ref
FB046	French Bulldog	PRJEB13468	SAMEA3928146	not determined
FB065	French Bulldog	PRJEB16012	SAMEA4504835	ref/ref
FB081	French Bulldog	PRJEB16012	SAMEA6249479	ref/ref
GP3	Great Pyrenees	PRJEB16012	SAMEA4848700	ref/ref
GR0855	Golden Retriever	PRJEB16012	SAMEA4504838	ref/ref
GR0859	Golden Retriever	PRJEB16012	SAMEA4506899	ref/ref
GR0860	Golden Retriever	PRJEB16012	SAMEA4509487	ref/ref
GR0892	Golden Retriever	PRJEB16012	SAMEA104016307	ref/ref
GR1078	Golden Retriever Mix	PRJEB16012	SAMEA104091572	ref/ref
GR1161	Golden Retriever	PRJEB16012	SAMEA4867924	ref/ref
GR1301	Golden Retriever	PRJEB16012	SAMEA6249503	ref/ref
GS1	German Shepherd	PRJNA266585		ref/ref
GS10	German Shepherd	PRJNA266585		ref/ref
GS104	Spitz (Grossspitz)	PRJEB16012	SAMEA104105252	ref/ref
GS2	German Shepherd	PRJNA266585		ref/ref
GS3	German Shepherd	PRJNA266585		ref/ref
GS4	German Shepherd	PRJNA266585		ref/ref
GS5	German Shepherd	PRJNA266585		ref/ref
GS6	German Shepherd	PRJNA266585		ref/ref
GS7	German Shepherd	PRJNA266585		ref/ref
GS8	German Shepherd	PRJNA266585		ref/ref
GS9	German Shepherd	PRJNA266585		ref/ref
GW004	German Wirehaired	PRJEB13468	SAMEA3928144	ref/ref
GY391	Greyhound	PRJEB16012	SAMEA4867933	ref/ref
GY393	Greyhound	PRJEB16012	SAMEA4848711	ref/ref
GY415	Greyhound	PRJEB16012	SAMEA4867932	ref/ref
GY416	Greyhound	PRJEB16012	SAMEA4848712	ref/ref
GY432	Greyhound	PRJEB16012	SAMEA104125118	ref/ref
HA008_SEA02120	Havanese	PRJEB16012	SAMEA5209177	not determined
HA009_SEA02121	Havanese	PRJEB16012	SAMEA5209178	not determined
HA010_GER00024	Havanese	PRJEB16012	SAMEA5209179	not determined
HT001	Heideterrier	PRJEB16012	SAMEA103135918	ref/ref
HW1706	Hovawart	PRJEB16012	SAMEA4506894	ref/ref
HW1872	Hovawart	PRJEB16012	SAMEA4848705	ref/ref
HW1979	Hovawart	PRJEB16012	SAMEA4867928	ref/ref
IST011	Irish Soft Coated Wheaten Terrier	PRJEB16012	SAMEA6249488	ref/ref
IST012	Irish Soft Coated Wheaten Terrier	PRJEB16012	SAMEA6249489	ref/ref
IST013	Irish Soft Coated Wheaten Terrier	PRJEB16012	SAMEA6249490	ref/ref
IST014	Irish Soft Coated Wheaten Terrier	PRJEB16012	SAMEA6249491	ref/ref
IST015	Irish Soft Coated Wheaten Terrier	PRJEB16012	SAMEA6249492	ref/ref
IST016	Irish Soft Coated Wheaten Terrier	PRJEB16012	SAMEA6249493	ref/ref
IST017	Irish Soft Coated Wheaten Terrier	PRJEB16012	SAMEA6249494	ref/ref
IST018	Irish Soft Coated Wheaten Terrier	PRJEB16012	SAMEA6249495	ref/ref
IST019	Irish Soft Coated Wheaten Terrier	PRJEB16012	SAMEA6258987	ref/ref
IST020	Irish Soft Coated Wheaten Terrier	PRJEB16012	SAMEA6249496	ref/ref
IT0390	Irish Terrier	PRJEB16012	SAMEA104283467	ref/ins	Affected by Darier disease
IT221	Irish Terrier	PRJEB13468	SAMEA3928141	ref/ref
JR0034	Jack Russell Terrier	PRJEB16012	SAMEA104125119	ref/ref
JR043_SEA02220	Jack Russell Terrier	PRJEB16012	SAMEA5209180	not determined
JR044_SEA02225	Jack Russell Terrier	PRJEB16012	SAMEA5209181	not determined
JR045	Jack Russell Terrier	PRJEB16012	SAMEA4867925	ref/ref
JR048	Jack Russel Terrier	PRJEB16012	SAMEA6249497	ref/ref
JR052	Jack Russel Terrier	PRJEB16012	SAMEA6249498	ref/ref
JT007	German Hunting Terrier	PRJEB16012	SAMEA104125120	ref/ref
JT011	German Hunting Terrier	PRJEB16012	SAMEA104283460	ref/ref
KEP033K1	Central Asian Shepherd dog	PRJNA380744	SRR5381785	not determined
KF042	Kromfohrländer	PRJEB6076	SAMEA2446055	ref/ref
KKH2684	Siberian Husky	PRJEB10823	SAMEA3539249	ref/ref
KM1	Kunming Dog	PRJNA266585		ref/ref
KM10	Kunming Dog	PRJNA266585		ref/ref
KM2	Kunming Dog	PRJNA266585		ref/ref
KM3	Kunming Dog	PRJNA266585		ref/ref
KM4	Kunming Dog	PRJNA266585		ref/ref
KM5	Kunming Dog	PRJNA266585		ref/ref
KM6	Kunming Dog	PRJNA266585		ref/ref
KM7	Kunming Dog	PRJNA266585		ref/ref
KM8	Kunming Dog	PRJNA266585		ref/ref
KM9	Kunming Dog	PRJNA266585		ref/ref
LA1869	Labrador Retriever	PRJEB16012	SAMEA4504834	ref/ref
LA2382	Mixed Breed (Labrador Retriever cross, Italy)	PRJEB16012	SAMEA104125075	ref/ref
LA2438	Labrador Retriever	PRJEB16012	SAMEA5209182	ref/ref
LA2439__PER00177	Labrador Retriever	PRJEB16012	SAMEA5209183	ref/ref
LA2443	Labrador Retriever	PRJEB16012	SAMEA104091568	ref/ref
LA882	Labrador Retriever	PRJEB5874	SAMEA2417015	ref/ref
LA900	Labrador Retriever	PRJEB5875	SAMEA2417016	ref/ref
LB0013	Leonberger	PRJEB16012	SAMEA4848665	ref/ref
LB0139	Leonberger	PRJEB16012	SAMEA4848666	ref/ref
LB0147	Leonberger	PRJEB16012	SAMEA4848690	ref/ref
LB0197	Leonberger	PRJEB16012	SAMEA4848676	ref/ref
LB0203	Leonberger	PRJEB16012	SAMEA4848667	ref/ref
LB0268	Leonberger	PRJEB16012	SAMEA4848668	ref/ref
LB0304	Leonberger	PRJEB16012	SAMEA4848669	ref/ref
LB0305	Leonberger	PRJEB16012	SAMEA4848670	ref/ref
LB0339	Leonberger	PRJEB16012	SAMEA4848671	ref/ref
LB0418	Leonberger	PRJEB16012	SAMEA4848672	ref/ref
LB0482	Leonberger	PRJEB16012	SAMEA4848673	ref/ref
LB0507	Leonberger	PRJEB16012	SAMEA4848691	ref/ref
LB0554	Leonberger	PRJEB16012	SAMEA4848692	ref/ref
LB0656	Leonberger	PRJEB16012	SAMEA4848693	ref/ref
LB0683	Leonberger	PRJEB16012	SAMEA4848674	ref/ref
LB111	Leonberger	PRJEB16012	SAMEA47266168	ref/ref
LB1848	Leonberger	PRJEB16012	SAMEA104656180	ref/ref
LB1919	Leonberger	PRJEB16012	SAMEA103935360	ref/ref
LB1961	Leonberger	PRJEB16012	SAMEA4848675	ref/ref
LB214	Leonberger	PRJEB16012	SAMEA4867936	ref/ref
LB3506	Leonberger	PRJEB16012	SAMEA4848684	ref/ref
LB3521	Leonberger	PRJEB16012	SAMEA4848694	ref/ref
LB3601	Leonberger	PRJEB16012	SAMEA4848685	not determined
LB3659	Leonberger	PRJEB16012	SAMEA4848686	ref/ref
LB3705	Leonberger	PRJEB16012	SAMEA4848687	not determined
LB3906	Leonberger	PRJEB16012	SAMEA4848688	ref/ref
LB4183	Leonberger	PRJEB16012	SAMEA4848689	ref/ref
LB4693	Leonberger	PRJEB16012	SAMEA4848695	ref/ref
LB5378	Leonberger	PRJEB16012	SAMEA4873254	ref/ref
LB5751	Leonberger	PRJEB16012	SAMEA4848699	ref/ref
LE0051	Leonberger	PRJEB16012	SAMEA4848677	ref/ref
LE0237	Leonberger	PRJEB16012	SAMEA4848678	ref/ref
LE0269	Leonberger	PRJEB16012	SAMEA4848679	ref/ref
LE0512	Leonberger	PRJEB16012	SAMEA4848680	ref/ref
LE0738	Leonberger	PRJEB16012	SAMEA4848681	ref/ref
LE0896	Leonberger	PRJEB16012	SAMEA4848696	ref/ref
LE1294	Leonberger	PRJEB16012	SAMEA4848682	ref/ref
LE1301	Leonberger	PRJEB16012	SAMEA4848683	ref/ref
LE1302	Leonberger	PRJEB16012	SAMEA4848697	ref/ref
LE1355	Leonberger	PRJEB16012	SAMEA4848698	ref/ref
LE2450	Leonberger	PRJEB16012	SAMEA104656181	ref/ref
LE3212	Leonberger	PRJEB16012	SAMEA5657399	ref/ref
LJ1	Chinese Indigenous Dog	PRJNA266585		ref/ref
LJ10	Chinese Indigenous Dog	PRJNA266585		ref/ref
LJ2	Chinese Indigenous Dog	PRJNA266585		ref/ref
LJ3	Chinese Indigenous Dog	PRJNA266585		ref/ref
LJ4	Chinese Indigenous Dog	PRJNA266585		ref/ref
LJ5	Chinese Indigenous Dog	PRJNA266585		ref/ref
LJ6	Chinese Indigenous Dog	PRJNA266585		ref/ref
LJ7	Chinese Indigenous Dog	PRJNA266585		ref/ref
LJ8	Chinese Indigenous Dog	PRJNA266585		ref/ref
LJ9	Chinese Indigenous Dog	PRJNA266585		ref/ref
LJP027A2	Swedish Vallhund	PRJNA394814	SRR5834681	ref/ref
LJP030A2	Swedish Vallhund	PRJNA394814	SRR5834680	ref/ref
LN048	Landseer	PRJEB9437	SAMEA3402917	ref/ref
LN47	Border Collie	PRJEB16012	SAMEA4504821	not determined
LR1030	Lagotto Romagnolo	PRJEB16012	SAMEA4509490	ref/ref
LR1149	Lagotto Romagnolo	PRJEB16012	SAMEA4867929	ref/ref
LR1248	Lagotto Romagnolo	PRJEB16012	SAMEA5657400	ref/ref
LR390	Lagotto Romagnolo	PRJEB13468	SAMEA3928142	ref/ref
LR416	Lagotto Romagnolo	PRJEB16012	SAMEA4867935	ref/ref
LR433	Lagotto Romagnolo	PRJEB16012	SAMEA4505491	ref/ref
LR494	Lagotto Romagnolo	PRJEB16012	SAMEA4505494	ref/ref
LR538	Lagotto Romagnolo	PRJEB16012	SAMEA104283462	ref/ref
LR654	Lagotto Romagnolo	PRJEB16012	SAMEA104283463	ref/ref
LR753	Lagotto Romagnolo	PRJEB16012	SAMEA4504833	ref/ref
MA008	Belgian Shepherd - Malinois variety	PRJEB16012	SAMEA4504823	ref/ref
MA0163	Belgian Shepherd - Malinois variety	PRJEB16012	SAMEA104032048	ref/ref
MA094	Belgian Shepherd - Malinois variety	PRJEB16012	SAMEA4504826	ref/ref
MA142	Belgian Shepherd - Malinois variety	PRJEB16012	SAMEA104125121	ref/ref
MA152	Belgian Shepherd - Malinois variety x Dutch Shepherd cross	PRJEB16012	SAMEA4506898	ref/ref
MA324	Belgian Shepherd - Malinois variety	PRJEB16012	SAMEA104125122	ref/ref
MA437	Belgian Shepherd - Malinois variety	PRJEB16012	SAMEA4848704	ref/ref
MA446	Belgian Shepherd - Malinois variety	PRJEB16012	SAMEA6249499	ref/ref
MA471	Belgian Shepherd - Malinois variety	PRJEB16012	SAMEA6249500	ref/ref
MB003	Miniature Bull terrier	PRJEB16012	SAMEA4867920	ref/ref
MI016	Mixed Breed	PRJEB16012	SAMEA4506893	ref/ref
MI020	Mixed breed	PRJEB16012	SAMEA4867919	ref/ref
MI025	mixed breed	PRJEB16012	SAMEA4867923	ref/ref
MP011_CAN00015	Pug	PRJEB16012	SAMEA5209184	not determined
MP012_CAN00016	Pug	PRJEB16012	SAMEA5209185	not determined
MP013_CAN00017	Pug	PRJEB16012	SAMEA5209186	not determined
MS32	Miniature Schnauzer	PRJEB16012	SAMEA5059499	ref/ref
MS77	Miniature Schnauzer	PRJEB16012	SAMEA5059500	ref/ref
NF187000	Newfoundland	PRJEB16012	SAMEA4848701	ref/ref
NF492	Newfoundland	PRJEB16012	SAMEA104500411	ref/ref
NW062	Norwich Terrier	PRJEB16012	SAMEA104091550	ref/ref
NW152	Norwich Terrier	PRJEB16012	SAMEA104091551	ref/ref
NW206	Norwich Terrier	PRJEB16012	SAMEA104091552	ref/ref
NW255	Norwich Terrier	PRJEB16012	SAMEA104091553	ref/ref
OS001	Old English Sheepdog	PRJEB16012	SAMEA4504841	not determined
PA073_AMY00153	Papillon	PRJEB16012	SAMEA5209187	not determined
PA074_AMY00157	Papillon	PRJEB16012	SAMEA5209188	not determined
PA075_AMY00158	Papillon	PRJEB16012	SAMEA5209189	not determined
PE002	Perro de Agua Español	PRJEB7903	SAMEA3164479	ref/ref
PG002__BGVP_17289	Petit Basset Griffon Vendeen	PRJEB11835	SAMEA3723573	ref/ref
PG003_GENEBANK0060	Petit Basset Griffon Vendeen	PRJEB16012	SAMEA5209190	not determined
PG004_GENEBANK00143	Petit Basset Griffon Vendeen	PRJEB16012	SAMEA5209191	not determined
PG005_GENEBANK00199	Petit Basset Griffon Vendeen	PRJEB16012	SAMEA5209192	not determined
PL116	Poodle	PRJEB16012 / PRJEB30571	SAMEA4506891 / SAMEA5205225	ref/ref
PL148__PER_BAN00024	Miniature Poodle	PRJEB16012	SAMEA5209193	ref/ref
PL150__D00105	Poodle	PRJNA503969	SAMN10386546	ref/ref
PL152__D00270	Poodle	PRJNA503969	SAMN10386547	ref/ref
PL153__D00271	Poodle	PRJNA503969	SAMN10386548	ref/ref
PL154__D00285	Poodle	PRJNA503969	SAMN10386549	ref/ref
PL156__D00353	Poodle	PRJNA503969	SAMN10386550	ref/ref
PL157__D00354	Poodle	PRJNA503969	SAMN10386551	ref/ref
PL158__D00373	Poodle	PRJNA503969	SAMN10386552	ref/ref
PL159__D00382	Poodle	PRJNA503969	SAMN10386553	ref/ref
PL160__D00392	Poodle	PRJNA503969	SAMN10386554	ref/ref
PL161__D00397	Poodle	PRJNA503969	SAMN10386555	ref/ref
PL162__D00477	Poodle	PRJNA503969	SAMN10386556	ref/ref
PL163__D00530	Poodle	PRJNA503969	SAMN10386557	ref/ref
PL164__D00817	Poodle	PRJNA503969	SAMN10386558	ref/ref
PL165__D00868	Poodle	PRJNA503969	SAMN10386559	ref/ref
RO015	Rottweiler	PRJEB16012	SAMEA6249501	ref/ref
RO2	Rottweiler	PRJEB7735	SAMEA3121337	ref/ref
ROS.gDNA.SID00115	Pug	PRJEB17926	SAMEA104389202	ref/ref
ROS.gDNA.SID00400	Whippet	PRJEB17926	SAMEA104389243	ref/ref
ROS.gDNA.SID00434	Bichon Frisé	PRJEB17926	SAMEA104388844	ref/ref
ROS.gDNA.SID00436	Pug	PRJEB17926	SAMEA104389203	ref/ref
ROS.gDNA.SID00437	Pug	PRJEB17926	SAMEA104389204	ref/ref
ROS.gDNA.SID00439	Pug	PRJEB17926	SAMEA104389205	ref/ref
ROS.gDNA.SID00464	Bichon Frisé	PRJEB17926	SAMEA104388845	ref/ref
ROS.gDNA.SID00488	Pug	PRJEB17926	SAMEA104389206	ref/ref
ROS.gDNA.SID00539	Bichon Frisé	PRJEB17926	SAMEA104388846	ref/ref
ROS.gDNA.SID00860	Saluki	PRJEB17926	SAMEA104389241	ref/ref
ROS.gDNA.SID01138	Kerry Blue Terrier	PRJEB17926	SAMEA104389201	ref/ref
ROS.gDNA.SID01166	Pug	PRJEB17926	SAMEA104389207	ref/ref
ROS.gDNA.SID01169	Pug	PRJEB17926	SAMEA104389208	ref/ref
ROS.gDNA.SID01170	Pug	PRJEB17926	SAMEA104389209	ref/ref
ROS.gDNA.SID01171	Pug	PRJEB17926	SAMEA104389210	ref/ref
ROS.gDNA.SID01221	Pug	PRJEB17926	SAMEA104389211	ref/ref
ROS.gDNA.SID01232	Bull Terrier	PRJEB17926	SAMEA104388849	ref/ref
ROS.gDNA.SID01237	Pug	PRJEB17926	SAMEA104389212	ref/ref
ROS.gDNA.SID01578	Shih Tzu	PRJEB17926	SAMEA104389242	ref/ref
ROS.gDNA.SID01682	Pug	PRJEB17926	SAMEA104389213	ref/ref
ROS.gDNA.SID01737	Dogue de Bordeaux	PRJEB17926	SAMEA104388851	ref/ref
ROS.gDNA.SID01899	Japanese Chin	PRJEB17926	SAMEA104388850	ref/ref
ROS.gDNA.SID01940	Airedale Terrier	PRJEB17926	SAMEA104388843	ref/ref
ROS.gDNA.SID02492	Pug	PRJEB17926	SAMEA104389237	ref/ref
ROS.gDNA.SID02765	Pug	PRJEB17926	SAMEA104389238	ref/ref
ROS.gDNA.SID02770	Pug	PRJEB17926	SAMEA104389239	ref/ref
ROS.gDNA.SID02832	Pug	PRJEB17926	SAMEA104389240	ref/ref
ROS.gDNA.SID02920	Bichon Frisé	PRJEB17926	SAMEA104388847	ref/ref
ROS.gDNA.SID03009	American Bulldog	PRJEB17926	SAMEA104388842	ref/ref
ROS.gDNA.SID03103	Brussels Griffon	PRJEB17926	SAMEA104388848	ref/ref
RR098	Rhodesian Ridgeback	PRJEB16012	SAMEA104091554	ref/ref
RR123	Rhodesian Ridgeback	PRJEB16012	SAMEA4504822	ref/ref
RR224	Rhodesian Ridgeback	PRJEB16012	SAMEA4505495	ref/ref
RR320	Rhodesian Ridgeback	PRJNA357866	SRR5117439	not determined
SG005	Sloughi	PRJEB13468	SAMEA3928143	ref/ref
SG006	Sloughi	PRJEB16012	SAMEA4506885	ref/ref
SG008	Sloughi	PRJEB16012	SAMEA4506888	ref/ref
SH008	Greater Swiss Mountain Dog	PRJEB16012	SAMEA4504837	ref/ref
SH010	Greater Swiss Mountain Dog	PRJEB16012 / PRJEB30571	SAMEA104658569 / SAMEA5205218	ref/ref
SH011	Greater Swiss Mountain Dog	PRJEB16012 / PRJEB30571	SAMEA104658570 / SAMEA5205219	ref/ref
SH012	Greater Swiss Mountain Dog	PRJEB16012 / PRJEB30571	SAMEA104656182 / SAMEA5205220	ref/ref
SH013	Greater Swiss Mountain Dog	PRJEB16012 / PRJEB30571	SAMEA104656183 / SAMEA5205226	ref/ref
SH050	Greater Swiss Mountain Dog	PRJEB16012	SAMEA6249502	ref/ref
SID00101	Cavalier King Charles Spaniel	PRJEB17926	SAMEA104379882	ref/ref
SID00110	American bulldog	PRJEB17926	SAMEA104379885	ref/ref
SID00122	Boxer	PRJEB17926	SAMEA104379880	ref/ref
SID00142	Affenpinscher	PRJEB17926	SAMEA104379879	ref/ref
SID00176	Bullmastiff	PRJEB17926	SAMEA104379881	ref/ref
SID00225	French Bulldog	PRJEB17926	SAMEA104379883	ref/ref
SID00354	Dogue de Bordeaux	PRJEB17926	SAMEA104379884	ref/ref
SL006	Saluki	PRJEB16012	SAMEA4504825	ref/ref
SM010	Standard Schnauzer	PRJEB16012	SAMEA104500412	ref/ref
SRR2094385	Beagle	PRJNA288568	SRR2094385	ref/ref
SRR2094386	Beagle	PRJNA288568	SRR2094386	ref/ref
SRR2094387	Border Collie	PRJNA288568	SRR2094387	ref/ref
SRR2094388	Border Collie	PRJNA288568	SRR2094388	ref/ref
SRR2094389	Border Collie	PRJNA288568	SRR2094389	ref/ref
SRR2094390	Brittany Spaniel	PRJNA288568	SRR2094390	not determined
SRR2094392	Chow Chow	PRJNA288568	SRR2094392	ref/ref
SRR2094393	Clumber Spaniel	PRJNA288568	SRR2094393	ref/ref
SRR2094396	English Mastiff	PRJNA288568	SRR2094396	ref/ref
SRR2094398	English Pointer	PRJNA288568	SRR2094398	ref/ref
SRR2094399	Greyhound	PRJNA288568	SRR2094399	ref/ref
SRR2094400	Irish Wolfhound	PRJNA288568	SRR2094400	ref/ref
SRR2094401	Italian Greyhound	PRJNA288568	SRR2094401	ref/ref
SRR2094404	Pug	PRJNA288568	SRR2094404	not determined
SRR2094405	Pug	PRJNA288568	SRR2094405	not determined
SRR2094406	Pug	PRJNA288568	SRR2094406	ref/ref
SRR2094407	Rhodesian Ridgeback	PRJNA288568	SRR2094407	ref/ref
SRR2094408	Saluki	PRJNA288568	SRR2094408	ref/ref
SRR2094409	Scottish Terrier	PRJNA288568	SRR2094409	ref/ref
SRR2095316	English Cocker Spaniel	PRJNA288568	SRR2095316	ref/ref
SRR2095317	Cavalier King Charles Spaniel	PRJNA288568	SRR2095317	ref/ref
SRR2095318	Doberman Pinscher	PRJNA288568	SRR2095318	ref/ref
SRR2095320	Golden Retriever	PRJNA288568	SRR2095320	ref/ref
SRR2095321	Great Pyrenees	PRJNA288568	SRR2095321	ref/ref
SRR2095322	Italian Greyhound	PRJNA288568	SRR2095322	ref/ref
SRR2095323	Labrador Retriever	PRJNA288568	SRR2095323	ref/ref
SRR2095324	Portuguese Pointer	PRJNA288568	SRR2095324	ref/ref
SRR2095325	Poodle	PRJNA288568	SRR2095325	ref/ref
SRR2095330	West Highland White Terrier	PRJNA288568	SRR2095330	ref/ref
SRR2095362	Wolf	PRJNA288568	SRR2095362	ref/ref
SRR2095368	Belgian Sheepdog	PRJNA288568	SRR2095368	ref/ref
SRR2095457	Belgian Sheepdog	PRJNA288568	SRR2095457	ref/ref
SRR2095463	Bernese Mountain Dog	PRJNA288568	SRR2095463	ref/ref
SRR2095469	Bloodhound	PRJNA288568	SRR2095469	ref/ref
SRR2095477	Bulldog	PRJNA288568	SRR2095477	ref/ref
SRR2095478	Chihuahua	PRJNA288568	SRR2095478	ref/ref
SRR2095479	English Cocker Spaniel	PRJNA288568	SRR2095479	ref/ref
SRR2095480	Flat Coated Retriever	PRJNA288568	SRR2095480	ref/ref
SRR2095487	Flat Coated Retriever	PRJNA288568	SRR2095487	ref/ref
SRR2095497	Great Dane	PRJNA288568	SRR2095497	ref/ref
SRR2095500	Pekingese	PRJNA288568	SRR2095500	ref/ref
SRR2095501	Rottweiler	PRJNA288568	SRR2095501	ref/ref
SRR2095502	St. Bernard	PRJNA288568	SRR2095502	ref/ref
SRR2095503	Saluki	PRJNA288568	SRR2095503	ref/ref
SRR2095504	Shetland Sheepdog	PRJNA288568	SRR2095504	ref/ref
SRR2095539	Siberian Husky	PRJNA288568	SRR2095539	ref/ref
SRR2095540	Poodle	PRJNA288568	SRR2095540	ref/ref
SRR2827577	Chinese Indigenous Dog	PRJNA266585	SRR2827577	ref/ref
SRR2827578	Chinese Indigenous Dog	PRJNA266585	SRR2827578	ref/ref
SRR2827579	Chinese Indigenous Dog	PRJNA266585	SRR2827579	ref/ref
SRR2827580	Chinese Indigenous Dog	PRJNA266585	SRR2827580	ref/ref
SRR2827581	Chinese Indigenous Dog	PRJNA266585	SRR2827581	ref/ref
SRR2827582	Chinese Indigenous Dog	PRJNA266585	SRR2827582	ref/ref
SRR2827583	Chinese Indigenous Dog	PRJNA266585	SRR2827583	ref/ref
SRR2827584	Chinese Indigenous Dog	PRJNA266585	SRR2827584	ref/ref
SRR2827585	Chinese Indigenous Dog	PRJNA266585	SRR2827585	ref/ref
SRR2827586	Chinese Indigenous Dog	PRJNA266585	SRR2827586	ref/ref
SRR2827587	Chinese Indigenous Dog	PRJNA266585	SRR2827587	ref/ref
SRR2827588	Chinese Indigenous Dog	PRJNA266585	SRR2827588	ref/ref
SRR2827589	Chinese Indigenous Dog	PRJNA266585	SRR2827589	ref/ref
SRR2827590	Chinese Indigenous Dog	PRJNA266585	SRR2827590	ref/ref
SRR2827591	Nigerian Indigenous Dog	PRJNA266585	SRR2827591	ref/ref
SRR2827592	Nigerian Indigenous Dog	PRJNA266585	SRR2827592	ref/ref
SRR2827593	Nigerian Indigenous Dog	PRJNA266585	SRR2827593	ref/ref
SRR2827594	Nigerian Indigenous Dog	PRJNA266585	SRR2827594	ref/ref
SRR2827595	Vietnamese Indigenous Dog	PRJNA266585	SRR2827595	ref/ref
SRR2827596	Vietnamese Indigenous Dog	PRJNA266585	SRR2827596	ref/ref
SRR2827597	Vietnamese Indigenous Dog	PRJNA266585	SRR2827597	ref/ref
SRR2827598	Vietnamese Indigenous Dog	PRJNA266585	SRR2827598	ref/ref
SRR2827599	Vietnamese Indigenous Dog	PRJNA266585	SRR2827599	ref/ref
SRR2827604	Jamthund	PRJNA266585	SRR2827604	ref/ref
SRR2827605	Jamthund	PRJNA266585	SRR2827605	ref/ref
SRR2827606	Chinese Indigenous Dog	PRJNA266585	SRR2827606	ref/ref
SRR2827607	Chinese Indigenous Dog	PRJNA266585	SRR2827607	not determined
SRR4011154	Shetland Sheepdog	PRJNA338147	SRR4011154	ref/ref
SRR4011155	German Shepherd	PRJNA338147	SRR4011155	ref/ref
SRR5190659	Collie	PRJNA338147	SRR5190659	ref/ref
SRR5190660	Collie	PRJNA338147	SRR5190660	ref/ref
SRR5190661	Collie	PRJNA338147	SRR5190661	ref/ref
SRR5190662	Collie	PRJNA338147	SRR5190662	ref/ref
SRR5190663	Collie	PRJNA338147	SRR5190663	ref/ref
SRR7120157	Dalmatian dog	PRJNA448733	SRR7120157	ref/ref
SRR7120158	Flat Coated Retriever	PRJNA448733	SRR7120158	ref/ref
SRR7120159	Fonni Dog	PRJNA448733	SRR7120159	ref/ref
SRR7120196	Portuguese Water Dog	PRJNA448733	SRR7120196	ref/ref
SRR7120198	Portuguese Water Dog	PRJNA448733	SRR7120198	ref/ref
SRR7120199	Portuguese Water Dog	PRJNA448733	SRR7120199	ref/ref
SRR7120200	Portuguese Water Dog	PRJNA448733	SRR7120200	ref/ref
SRR7120201	Portuguese Water Dog	PRJNA448733	SRR7120201	ref/ref
SRR7120203	Portuguese Water Dog	PRJNA448733	SRR7120203	ref/ref
SRR7120204	Rottweiler	PRJNA448733	SRR7120204	ref/ref
SRR7120205	Rottweiler	PRJNA448733	SRR7120205	ref/ref
SRR7120206	Rottweiler	PRJNA448733	SRR7120206	ref/ref
SRR7120207	Rottweiler	PRJNA448733	SRR7120207	ref/ref
SRR7120208	Rottweiler	PRJNA448733	SRR7120208	ref/ref
SRR7120211	Samoyed	PRJNA448733	SRR7120211	ref/ref
SRR7120212	Scottish Terrier	PRJNA448733	SRR7120212	ref/ref
SRR7120213	Scottish Terrier	PRJNA448733	SRR7120213	ref/ref
SRR7120232	West Highland White Terrier	PRJNA448733	SRR7120232	ref/ref
SRR7120233	West Highland White Terrier	PRJNA448733	SRR7120233	ref/ref
SRR7120234	West Highland White Terrier	PRJNA448733	SRR7120234	ref/ref
SRS661486	Wolf Great Lakes	PRJNA255370	SAMN02921310	ref/ref
SRS661488	Wolf Iran	PRJNA255370	SAMN02921312	ref/ref
SRS661492	Wolf Portugal	PRJNA255370	SAMN02921316	ref/ref
SRS661495	Wolf Spain	PRJNA255370	SAMN02921319	ref/ref
SRS661496	Wolf Yellowstone	PRJNA255370	SAMN02921320	ref/ref
SRS713815	Chinese Crested dog	PRJNA261736	SAMN03075611	ref/ref
SRS732550	Pembroke Welsh Corgi	PRJNA263947	SAMN03145703	ref/ref
SRS732551	Pembroke Welsh Corgi	PRJNA263947	SAMN03145704	ref/ref
SRS833812	Black Russian Terrier	PRJNA263947	SAMN03323668	ref/ref
SRS932138	Shetland Sheepdog	PRJNA263947	SAMN03580413	ref/ref
SRS932143	Standard Poodle	PRJNA263947	SAMN03580408	ref/ref
SRS932144	Border Terrier	PRJNA263947	SAMN03580407	ref/ref
SRS932145	Tibetan Terrier	PRJNA263947	SAMN03580406	ref/ref
SRS932146	Berger Picard	PRJNA263947	SAMN03580405	ref/ref
SRS932147	Jack Russell Terrier	PRJNA263947	SAMN03580404	ref/ref
SRS932148	Tibetan Terrier	PRJNA263947	SAMN03580403	ref/ref
SRS932149	Golden Retriever	PRJNA263947	SAMN03580402	ref/ref
SRS932150	Scottish Deerhound	PRJNA263947	SAMN03580401	ref/ref
SRS932151	Jack Russell Terrier	PRJNA263947	SAMN03580400	ref/ref
SRS932152	Labrador Retriever	PRJNA263947	SAMN03580399	ref/ref
SRS932153	West Highland White Terrier	PRJNA263947	SAMN03580398	ref/ref
SRS932157	Scottish Terrier	PRJNA263947	SAMN03580394	ref/ref
SRS932158	Basenji	PRJNA263947	SAMN03580393	ref/ref
SRS932159	German Shepherd	PRJNA263947	SAMN03580392	ref/ref
SRS932160	English Springer Spaniel	PRJNA263947	SAMN03580391	ref/ref
SRS932161	Airedale Terrier	PRJNA263947	SAMN03580390	ref/ref
SRS932162	Border Collie	PRJNA263947	SAMN03580389	ref/ref
SRS932163	Portuguese Podengo	PRJNA263947	SAMN03580388	ref/ref
SRS932164	Kerry Blue Terrier	PRJNA263947	SAMN03580387	ref/ref
SS004	Shetland Sheepdog	PRJEB16012	SAMEA104091573	ref/ref
SS096	Shetland Sheepdog	PRJEB16012	SAMEA4867921	ref/ref
STB24	St. Bernard	PRJEB16012	SAMEA4848702	ref/ref
STB27	St. Bernard	PRJEB16012	SAMEA4848703	ref/ref
SV_25951	Swedish Vallhund	PRJEB21485	ERR2834335	ref/ref
SY001	Alaskan Husky (not purebred)	PRJEB9590	SAMEA3449656	ref/ref
SY018	Alaskan Husky (not purebred)	PRJEB9591	SAMEA3449657	ref/ref
SY046	Siberian Husky	PRJEB16012	SAMEA104091559	ref/ref
SZ004__PER00751	Shih Tzu	PRJNA448733	SRR7120214	ref/ref
SZ005_SEA05009	Shih Tzu	PRJEB16012	SAMEA5209194	not determined
SZ006_SEA05080	Shih Tzu	PRJEB16012	SAMEA5209195	not determined
TA001	Airedale Terrier	PRJEB16012	SAMEA4506896	ref/ref
TM1	Tibetan Mastiff	PRJNA266585		ref/ref
TM10	Tibetan Mastiff	PRJNA266585		ref/ref
TM2	Tibetan Mastiff	PRJNA266585		ref/ref
TM3	Tibetan Mastiff	PRJNA266585		ref/ref
TM4	Tibetan Mastiff	PRJNA266585		ref/ref
TM5	Tibetan Mastiff	PRJNA266585		ref/ref
TM6	Tibetan Mastiff	PRJNA266585		ref/ref
TM7	Tibetan Mastiff	PRJNA266585		ref/ref
TM8	Tibetan Mastiff	PRJNA266585		not determined
TM9	Tibetan Mastiff	PRJNA266585		ref/ref
V_23005	Vizsla (smooth coat)	PRJEB12340	ERR1210830	ref/ref
WE006	Weimaraner	PRJEB16012	SAMEA4506902	ref/ref
WE008	Weimaraner	PRJEB16012	SAMEA104283466	ref/ref
WH083	Whippet	PRJEB16012	SAMEA4506886	ref/ref
WH118	Whippet	PRJEB16012	SAMEA5657394	ref/ref
WH122	Whippet	PRJEB16012	SAMEA5657395	ref/ref
WO001_895	wolf	PRJEB16012	SAMEA104091563	ref/ref
WO002_732	wolf	PRJEB16012	SAMEA104091564	ref/ref
WO003_636	wolf	PRJEB16012	SAMEA104091565	ref/ref
WW174	West Highland White Terrier	PRJEB16012	SAMEA4506901	ref/ref
WW361	West Highland White Terrier	PRJEB16012	SAMEA4504842	ref/ref
WW362	West Highland White Terrier	PRJEB16012	SAMEA4509489	ref/ref
WW363	West Highland White Terrier	PRJEB16012	SAMEA4504843	ref/ref
WW364	West Highland White Terrier	PRJEB16012	SAMEA4504836	ref/ref
WW558	West Highland White Terrier	PRJEB16012	SAMEA104091561	ref/ref
WW635__West04	West Highland White Terrier	PRJEB16012	SAMEA5059501	not determined
WW637__West06	West Highland White Terrier	PRJEB16012	SAMEA5059502	not determined
WW639__West10	West Highland White Terrier	PRJEB16012	SAMEA5059503	not determined
WW64	West Highland White Terrier	PRJEB13723	SAMEA3940300	ref/ref
WW640__West13	West Highland White Terrier	PRJEB16012	SAMEA5059504	ref/ref
WW641__West16	West Highland White Terrier	PRJEB16012	SAMEA5059505	ref/ref
WW642__West19	West Highland White Terrier	PRJEB16012	SAMEA5059506	not determined
WW643__West24	West Highland White Terrier	PRJEB16012	SAMEA5059507	ref/ref
WW644__West25	West Highland White Terrier	PRJEB16012	SAMEA5059508	ref/ref
WW645__West26	West Highland White Terrier	PRJEB16012	SAMEA5059509	ref/ref
WW646__West30	West Highland White Terrier	PRJEB16012	SAMEA5059510	not determined
WW647__Zombie	Dutch Shepherd	PRJEB16012	SAMEA5059511	ref/ref
WW665	West Highland White Terrier	PRJEB16012	SAMEA4848706	ref/ref
YJ1	Chinese Indigenous Dog	PRJNA266585		ref/ref
YJ2	Chinese Indigenous Dog	PRJNA266585		ref/ref
YJ3	Chinese Indigenous Dog	PRJNA266585		ref/ref
YJ4	Chinese Indigenous Dog	PRJNA266585		ref/ref
YJ5	Chinese Indigenous Dog	PRJNA266585		ref/ref
YJ6	Chinese Indigenous Dog	PRJNA266585		ref/ref
YJ7	Chinese Indigenous Dog	PRJNA266585		ref/ref
YJ9	Chinese Indigenous Dog	PRJNA266585		ref/ref
YT003	Yorkshire Terrier	PRJEB13468	SAMEA3928145	ref/ref
YT024__PER_BAN00032	Yorkshire Terrier	PRJNA448733	SRR7120237	ref/ref
YT025__PER_BAN00040	Yorkshire Terrier	PRJNA448733	SRR7120238	ref/ref
YT027__PER_BAN00079	Yorkshire Terrier	PRJNA448733	SRR7120239	ref/ref
YT028__PER_BAN00119	Yorkshire Terrier	PRJEB16012	SAMEA5209196	ref/ref
YT030__PER_BAN00133	Yorkshire Terrier	PRJNA448733	SRR7120241	ref/ref
YT031__PER_BAN00136	Yorkshire Terrier	PRJNA448733	SRR7120242	ref/ref
YT032__PER_BAN00140	Yorkshire Terrier	PRJEB16012	SAMEA5209197	ref/ref
YT033__PER_BAN00142	Yorkshire Terrier	PRJEB16012	SAMEA5209198	ref/ref
YT036__PER_BAN00183	Yorkshire Terrier	PRJNA448733	SRR7120244	not determined
YT040__PER_BAN00283	Yorkshire Terrier	PRJNA448733	SRR7120246	ref/ref
YT041__PER_BAN00289	Yorkshire Terrier	PRJNA448733	SRR7120247	ref/ref
YT044__PER_BAN00368	Yorkshire Terrier	PRJNA448733	SRR7120248	ref/ref
YT046__PER_BAN00380	Yorkshire Terrier	PRJNA448733	SRR7120249	ref/ref
YT048__PER_BAN00437	Yorkshire Terrier	PRJNA448733	SRR7120250	ref/ref
YT049__PER_BAN00449	Yorkshire Terrier	PRJNA448733	SRR7120251	ref/ref
YT050__PER_BAN00461	Yorkshire Terrier	PRJNA448733	SRR7120252	ref/ref
YT052__PER00016	Yorkshire Terrier	PRJNA448733	SRR7120253	ref/ref
YT053__PER00018	Yorkshire Terrier	PRJNA448733	SRR7120254	ref/ref
YT055__PER00061	Yorkshire Terrier	PRJNA448733	SRR7120256	ref/ref
YT056__PER00064	Yorkshire Terrier	PRJNA448733	SRR7120257	ref/ref
YT058__PER00107	Yorkshire Terrier	PRJNA448733	SRR7120259	ref/ref
YT059__PER00138	Yorkshire Terrier	PRJNA448733	SRR7120260	ref/ref
YT062__PER00144	Yorkshire Terrier	PRJNA448733	SRR7120262	ref/ref
YT065__PER00204	Yorkshire Terrier	PRJNA448733	SRR7120264	ref/ref
YT066__PER00226	Yorkshire Terrier	PRJNA448733	SRR7120265	ref/ref
YT067__PER00259	Yorkshire Terrier	PRJNA448733	SRR7120266	ref/ref
YT068__PER00274	Yorkshire Terrier	PRJNA448733	SRR7120267	ref/ref
YT070__PER00314	Yorkshire Terrier	PRJNA448733	SRR7120269	ref/ref
YT073__PER00327	Yorkshire Terrier	PRJNA448733	SRR7120272	ref/ref
YT074__PER00344	Yorkshire Terrier	PRJNA448733	SRR7120273	ref/ref
YT076__PER00361	Yorkshire Terrier	PRJNA448733	SRR7120274	ref/ref
YT077__PER00393	Yorkshire Terrier	PRJNA448733	SRR7120275	not determined
YT078__PER00394	Yorkshire Terrier	PRJNA448733	SRR7120276	ref/ref
YT079__PER00408	Yorkshire Terrier	PRJNA448733	SRR7120277	not determined
YT080__PER00409	Yorkshire Terrier	PRJNA448733	SRR7120278	ref/ref
YT081__PER00419	Yorkshire Terrier	PRJEB16012	SAMEA5209199	ref/ref
YT082__PER00425	Yorkshire Terrier	PRJNA448733	SRR7120279	ref/ref
YT085__PER00449	Yorkshire Terrier	PRJEB16012	SAMEA5209200	ref/ref
YT087__PER00462	Yorkshire Terrier	PRJNA448733	SRR7120283	ref/ref
YT088__PER00465	Yorkshire Terrier	PRJNA448733	SRR7120284	ref/ref
YT089__PER00481	Yorkshire Terrier	PRJNA448733	SRR7120285	ref/ref
YT090__PER00484	Yorkshire Terrier	PRJNA448733	SRR7120286	ref/ref
YT091__PER00550	Yorkshire Terrier	PRJNA448733	SRR7120287	ref/ref
YT092__PER00594	Yorkshire Terrier	PRJNA448733	SRR7120288	ref/ref
YT094__PER00605	Yorkshire Terrier	PRJNA448733	SRR7120290	ref/ref
YT095__PER00606	Yorkshire Terrier	PRJNA448733	SRR7120291	ref/ref
YT096__PER00607	Yorkshire Terrier	PRJNA448733	SRR7120292	ref/ref
YT097__PER00622	Yorkshire Terrier	PRJNA448733	SRR7120293	ref/ref
YT098__PER00626	Yorkshire Terrier	PRJNA448733	SRR7120294	ref/ref
YT101__PER00642	Yorkshire Terrier	PRJNA448733	SRR7120296	ref/ref
YT102__PER00646	Yorkshire Terrier	PRJNA448733	SRR7120297	ref/ref
YT103__PER00650	Yorkshire Terrier	PRJNA448733	SRR7120298	ref/ref
YT104__PER00658	Yorkshire Terrier	PRJNA448733	SRR7120299	ref/ref
YT105__PER00738	Yorkshire Terrier	PRJNA448733	SRR7120300	ref/ref
YT106__PER00739	Yorkshire Terrier	PRJNA448733	SRR7120301	ref/ref
YT108__PER00750	Yorkshire Terrier	PRJNA448733	SRR7120303	ref/ref
YT109__PER00758	Yorkshire Terrier	PRJNA448733	SRR7120304	ref/ref
YT110__PER00777	Yorkshire Terrier	PRJNA448733	SRR7120305	ref/ref
YT111__PER00806	Yorkshire Terrier	PRJNA448733	SRR7120306	ref/ref
YT112__PER00816	Yorkshire Terrier	PRJNA448733	SRR7120307	ref/ref
ZS14	Landseer	PRJEB7734	SAMEA3121328	ref/ref
ZS14_2	Pomeranian	PRJEB16012	SAMEA4506892	ref/ref
ZS554_SEA05298	Pomeranian	PRJEB16012	SAMEA5209201	not determined
ZS555_PLM00063	Pomeranian	PRJEB16012	SAMEA5209203	not determined
ZZ023__MS04593	Miniature Schnauzer	PRJEB16012	SAMEA5209202	ref/ref
ZZ024_MS13	Miniature Schnauzer	PRJEB16012	SAMEA5059514	not determined
ZZ025_MS25	Miniature Schnauzer	PRJEB16012	SAMEA5059515	not determined
ZZ026_MS80	Miniature Schnauzer	PRJEB16012	SAMEA5059516	not determined
ZZ028_MS171	Miniature Schnauzer	PRJEB16012	SAMEA5059517	not determined
ZZ029_MS190	Miniature Schnauzer	PRJEB16012	SAMEA5059518	not determined
ZZ030_MS241	Miniature Schnauzer	PRJEB16012	SAMEA5059519	not determined
ZZ031_MS249	Miniature Schnauzer	PRJEB16012	SAMEA5059520	not determined
ZZ032_MS251	Miniature Schnauzer	PRJEB16012	SAMEA5059521	not determined
ZZ034_MS260	Miniature Schnauzer	PRJEB16012	SAMEA5059522	not determined
ZZ035_MS279	Miniature Schnauzer	PRJEB16012	SAMEA5059523	not determined
ZZ16_MS06	Miniature Schnauzer	PRJEB16012	SAMEA3444493	ref/ref
ZZ17_MS07	Miniature Schnauzer	PRJEB16012	SAMEA1066474	ref/ref
ZZ18_MS08	Miniature Schnauzer	PRJEB16012	SAMEA1066475	ref/ref
ZZ19_MS09	Miniature Schnauzer	PRJEB16012	SAMEA1066476	ref/ref
