# Supplementary material for: ATP2A2 SINE Insertion in an Irish Terrier with Darier Disease and Associated Infundibular Cyst Formation
Source: Genes (Basel). 2020 Apr 28;11(5):481. doi: 10.3390/genes11050481 (PMC7291265; doi:10.3390/genes11050481)
Supplement: Supplementary file 1 [file genes-11-00481-s001.zip › Table_S2_Private_Variants.xlsx]

## Sheet: IT390_Homozygous_Variants
Table S2. Private variants in the genome of the affected Irish Terrier IT390. Variants were called with respect to the CanFam 3.1 reference genome assembly. The functional annotation of the variants is based on the NCBI annotation release 105. The table is in "1 effect per line" format. Thus, one variant will be listed several times, if multiple effects, e.g. on different alternative transcripts,…
#CHROM	POS	REF	ALT	FILTER	EFFECT	IMPACT	GENE	GENEID	FEATURE	FEATUREID	BIOTYPE	RANK	HGVS_C	HGVS_P
10	10514053	G	A	PASS	intergenic_region	MODIFIER	IL22-MDM1	481153-474439	intergenic_region	481153-474439		-1	n.10514053G>A
10	10552055	T	G	PASS	upstream_gene_variant	MODIFIER	LOC102152432	102152432	transcript	XR_002630443.1	pseudogene	-1	n.-883T>G
10	10552055	T	G	PASS	upstream_gene_variant	MODIFIER	LOC102152432	102152432	transcript	XR_002630444.1	pseudogene	-1	n.-883T>G
10	10552055	T	G	PASS	upstream_gene_variant	MODIFIER	LOC102152432	102152432	transcript	XR_002630445.1	pseudogene	-1	n.-889T>G
10	10552055	T	G	PASS	downstream_gene_variant	MODIFIER	LOC111097592	111097592	transcript	XR_002630448.1	pseudogene	-1	n.*1858A>C
10	10552055	T	G	PASS	downstream_gene_variant	MODIFIER	LOC111097592	111097592	transcript	XR_002630446.1	pseudogene	-1	n.*1858A>C
10	10552055	T	G	PASS	downstream_gene_variant	MODIFIER	LOC111097592	111097592	transcript	XR_002630447.1	pseudogene	-1	n.*1858A>C
10	10552055	T	G	PASS	intron_variant	MODIFIER	MDM1	474439	transcript	XM_005625601.3	protein_coding	1	c.17-363A>C
10	10552055	T	G	PASS	intron_variant	MODIFIER	MDM1	474439	transcript	XM_005625602.3	protein_coding	1	c.17-363A>C
10	10552055	T	G	PASS	intron_variant	MODIFIER	MDM1	474439	transcript	XM_005625603.3	protein_coding	1	c.17-363A>C
10	10763571	C	T	PASS	intergenic_region	MODIFIER	LOC111097591-RAP1B	111097591-608981	intergenic_region	111097591-608981		-1	n.10763571C>T
10	27026434	C	T	PASS	intergenic_region	MODIFIER	CDC42EP1-CARD10	481267-481268	intergenic_region	481267-481268		-1	n.27026434C>T
10	28768776	T	A	GATKstd	intergenic_region	MODIFIER	HMOX1-TOM1	442987-608746	intergenic_region	442987-608746		-1	n.28768776T>A
10	36283044	A	T	PASS	intergenic_region	MODIFIER	LOC111097842-LOC100682592	111097842-100682592	intergenic_region	111097842-100682592		-1	n.36283044A>T
10	53446978	A	G	GATKstd	intergenic_region	MODIFIER	LOC100683314-LOC100688606	100683314-100688606	intergenic_region	100683314-100688606		-1	n.53446978A>G
10	68790450	A	AT	PASS	intron_variant	MODIFIER	TIA1	610625	transcript	XM_014117594.2	protein_coding	2	c.54-1873_54-1872insA
10	68790450	A	AT	PASS	intron_variant	MODIFIER	TIA1	610625	transcript	XM_022424855.1	protein_coding	2	c.54-1873_54-1872insA
10	68790450	A	AT	PASS	intron_variant	MODIFIER	TIA1	610625	transcript	XM_022424866.1	protein_coding	1	c.15-1873_15-1872insA
10	68790450	A	AT	PASS	intron_variant	MODIFIER	TIA1	610625	transcript	XM_022424859.1	protein_coding	1	c.-1004-1873_-1004-1872insA
10	68790450	A	AT	PASS	intron_variant	MODIFIER	TIA1	610625	transcript	XM_005626193.3	protein_coding	2	c.54-1873_54-1872insA
10	68790450	A	AT	PASS	intron_variant	MODIFIER	TIA1	610625	transcript	XM_005626195.3	protein_coding	2	c.54-1873_54-1872insA
10	68790450	A	AT	PASS	intron_variant	MODIFIER	TIA1	610625	transcript	XM_861478.5	protein_coding	1	c.27-1873_27-1872insA
10	68790450	A	AT	PASS	intron_variant	MODIFIER	TIA1	610625	transcript	XM_014117596.2	protein_coding	1	c.27-1873_27-1872insA
10	68790450	A	AT	PASS	intron_variant	MODIFIER	TIA1	610625	transcript	XM_014117597.2	protein_coding	2	c.54-1873_54-1872insA
10	68790450	A	AT	PASS	intron_variant	MODIFIER	TIA1	610625	transcript	XM_022424856.1	protein_coding	2	c.54-1873_54-1872insA
10	68790450	A	AT	PASS	intron_variant	MODIFIER	TIA1	610625	transcript	XM_022424857.1	protein_coding	2	c.54-1873_54-1872insA
10	68790450	A	AT	PASS	intron_variant	MODIFIER	TIA1	610625	transcript	XM_014117595.2	protein_coding	2	c.54-1873_54-1872insA
10	68790450	A	AT	PASS	intron_variant	MODIFIER	TIA1	610625	transcript	XR_002631006.1	pseudogene	2	n.366-1873_366-1872insA
10	68790450	A	AT	PASS	intron_variant	MODIFIER	TIA1	610625	transcript	XR_002631012.1	pseudogene	2	n.374-1873_374-1872insA
10	68790450	A	AT	PASS	intron_variant	MODIFIER	TIA1	610625	transcript	XR_002631007.1	pseudogene	2	n.384-1873_384-1872insA
10	68790450	A	AT	PASS	intron_variant	MODIFIER	TIA1	610625	transcript	XR_002631008.1	pseudogene	2	n.384-1873_384-1872insA
10	68790450	A	AT	PASS	intron_variant	MODIFIER	TIA1	610625	transcript	XR_002631010.1	pseudogene	2	n.384-1873_384-1872insA
10	68790450	A	AT	PASS	intron_variant	MODIFIER	TIA1	610625	transcript	XR_002631009.1	pseudogene	2	n.382-1873_382-1872insA
10	68790450	A	AT	PASS	intron_variant	MODIFIER	TIA1	610625	transcript	XR_002631011.1	pseudogene	2	n.384-1873_384-1872insA
11	7326056	G	A	GATKstd	intergenic_region	MODIFIER	LOC111097915-LOC111097917	111097915-111097917	intergenic_region	111097915-111097917		-1	n.7326056G>A
11	7365561	G	A	PASS	intergenic_region	MODIFIER	LOC111097915-LOC111097917	111097915-111097917	intergenic_region	111097915-111097917		-1	n.7365561G>A
11	7994096	G	A	PASS	intron_variant	MODIFIER	LOC102152834	102152834	transcript	XR_002631258.1	pseudogene	7	n.933+16601C>T
11	8123838	T	C	PASS	intron_variant	MODIFIER	LOC102152834	102152834	transcript	XR_002631258.1	pseudogene	2	n.414+26838A>G
11	8123838	T	C	PASS	intron_variant	MODIFIER	LOC102152834	102152834	transcript	XR_002631259.1	pseudogene	2	n.414+26838A>G
11	8755907	T	C	PASS	downstream_gene_variant	MODIFIER	LOC111097994	111097994	transcript	XR_002631269.1	pseudogene	-1	n.*3180A>G
11	8755907	T	C	PASS	intron_variant	MODIFIER	HSD17B4	474630	transcript	XM_005626345.3	protein_coding	9	c.793-69T>C
11	8755907	T	C	PASS	intron_variant	MODIFIER	HSD17B4	474630	transcript	XM_531860.6	protein_coding	9	c.718-69T>C
11	8755907	T	C	PASS	intron_variant	MODIFIER	HSD17B4	474630	transcript	XM_014117634.1	protein_coding	9	c.304-69T>C
11	8755907	T	C	PASS	intron_variant	MODIFIER	HSD17B4	474630	transcript	XM_022425144.1	protein_coding	4	c.373-69T>C
11	10808526	A	G	GATKstd	intergenic_region	MODIFIER	LOC100856583-LOC111097922	100856583-111097922	intergenic_region	100856583-111097922		-1	n.10808526A>G
11	25633244	A	T	GATKstd	downstream_gene_variant	MODIFIER	PKD2L2	100855705	transcript	XM_022425338.1	protein_coding	-1	c.*5132A>T
11	25633244	A	T	GATKstd	downstream_gene_variant	MODIFIER	PKD2L2	100855705	transcript	XM_022425341.1	protein_coding	-1	c.*5132A>T
11	25633244	A	T	GATKstd	downstream_gene_variant	MODIFIER	PKD2L2	100855705	transcript	XM_022425342.1	protein_coding	-1	c.*5132A>T
11	25633244	A	T	GATKstd	intron_variant	MODIFIER	FAM13B	100855720	transcript	XM_005626586.3	protein_coding	21	c.2443-754T>A
11	25633244	A	T	GATKstd	intron_variant	MODIFIER	FAM13B	100855720	transcript	XM_005626591.3	protein_coding	21	c.2443-754T>A
11	25633244	A	T	GATKstd	intron_variant	MODIFIER	FAM13B	100855720	transcript	XM_005626588.3	protein_coding	21	c.2443-754T>A
11	25633244	A	T	GATKstd	intron_variant	MODIFIER	FAM13B	100855720	transcript	XM_005626587.3	protein_coding	21	c.2443-754T>A
11	25633244	A	T	GATKstd	intron_variant	MODIFIER	FAM13B	100855720	transcript	XM_005626590.3	protein_coding	21	c.2443-754T>A
11	25633244	A	T	GATKstd	intron_variant	MODIFIER	FAM13B	100855720	transcript	XM_003639377.4	protein_coding	19	c.2281-754T>A
11	25633244	A	T	GATKstd	intron_variant	MODIFIER	FAM13B	100855720	transcript	XM_005626592.3	protein_coding	20	c.2377-754T>A
11	25633244	A	T	GATKstd	intron_variant	MODIFIER	FAM13B	100855720	transcript	XM_005626593.3	protein_coding	20	c.2347-754T>A
11	25633244	A	T	GATKstd	intron_variant	MODIFIER	FAM13B	100855720	transcript	XM_005626595.3	protein_coding	19	c.2263-754T>A
11	25633244	A	T	GATKstd	intron_variant	MODIFIER	FAM13B	100855720	transcript	XM_014117736.2	protein_coding	21	c.2440-754T>A
11	25633244	A	T	GATKstd	intron_variant	MODIFIER	FAM13B	100855720	transcript	XM_022425336.1	protein_coding	20	c.2287-754T>A
11	25633244	A	T	GATKstd	intron_variant	MODIFIER	FAM13B	100855720	transcript	XM_022425337.1	protein_coding	19	c.1843-754T>A
11	39383345	G	T	GATKstd	intron_variant	MODIFIER	SLC24A2	481554	transcript	XM_005626669.3	protein_coding	2	c.931-13537C>A
11	39383345	G	T	GATKstd	intron_variant	MODIFIER	SLC24A2	481554	transcript	XM_005626670.3	protein_coding	2	c.931-13537C>A
11	39383346	C	A	GATKstd	intron_variant	MODIFIER	SLC24A2	481554	transcript	XM_005626669.3	protein_coding	2	c.931-13538G>T
11	39383346	C	A	GATKstd	intron_variant	MODIFIER	SLC24A2	481554	transcript	XM_005626670.3	protein_coding	2	c.931-13538G>T
11	39383628	C	T	GATKstd	intron_variant	MODIFIER	SLC24A2	481554	transcript	XM_005626669.3	protein_coding	2	c.931-13820G>A
11	39383628	C	T	GATKstd	intron_variant	MODIFIER	SLC24A2	481554	transcript	XM_005626670.3	protein_coding	2	c.931-13820G>A
11	42509616	G	C	PASS	intron_variant	MODIFIER	ELAVL2	481565	transcript	XM_014117793.2	protein_coding	6	c.807-2274C>G
11	42509616	G	C	PASS	intron_variant	MODIFIER	ELAVL2	481565	transcript	XM_014117794.2	protein_coding	6	c.801-2274C>G
11	42509616	G	C	PASS	intron_variant	MODIFIER	ELAVL2	481565	transcript	XM_014117796.2	protein_coding	5	c.714-2274C>G
11	42509616	G	C	PASS	intron_variant	MODIFIER	ELAVL2	481565	transcript	XM_005626684.3	protein_coding	6	c.801-2274C>G
11	42509616	G	C	PASS	intron_variant	MODIFIER	ELAVL2	481565	transcript	XM_014117792.2	protein_coding	6	c.807-2274C>G
11	42509616	G	C	PASS	intron_variant	MODIFIER	ELAVL2	481565	transcript	XM_014117795.2	protein_coding	5	c.714-2274C>G
11	42509616	G	C	PASS	intron_variant	MODIFIER	ELAVL2	481565	transcript	XM_022425480.1	protein_coding	6	c.807-2274C>G
11	42509616	G	C	PASS	intron_variant	MODIFIER	ELAVL2	481565	transcript	XM_022425481.1	protein_coding	6	c.801-2274C>G
11	42509616	G	C	PASS	intron_variant	MODIFIER	ELAVL2	481565	transcript	XM_022425483.1	protein_coding	6	c.798-2274C>G
11	42509616	G	C	PASS	intron_variant	MODIFIER	ELAVL2	481565	transcript	XM_022425484.1	protein_coding	6	c.807-2905C>G
11	42509616	G	C	PASS	intron_variant	MODIFIER	ELAVL2	481565	transcript	XM_022425485.1	protein_coding	6	c.807-2908C>G
11	42509616	G	C	PASS	intron_variant	MODIFIER	ELAVL2	481565	transcript	XM_022425486.1	protein_coding	6	c.801-2905C>G
11	42509616	G	C	PASS	intron_variant	MODIFIER	ELAVL2	481565	transcript	XM_022425487.1	protein_coding	6	c.801-2908C>G
11	42509616	G	C	PASS	intron_variant	MODIFIER	ELAVL2	481565	transcript	XM_022425488.1	protein_coding	5	c.714-2274C>G
11	42509616	G	C	PASS	intron_variant	MODIFIER	ELAVL2	481565	transcript	XM_022425482.1	protein_coding	6	c.798-2274C>G
11	42961029	A	C	GATKstd	intergenic_region	MODIFIER	LOC111098068-LOC111097944	111098068-111097944	intergenic_region	111098068-111097944		-1	n.42961029A>C
11	43519961	G	C	PASS	downstream_gene_variant	MODIFIER	LOC100686955	100686955	transcript	100686955	pseudogene	-1	n.*3772C>G
11	43519961	G	C	PASS	intergenic_region	MODIFIER	LOC111098069-LOC100686955	111098069-100686955	intergenic_region	111098069-100686955		-1	n.43519961G>C
11	61135941	CCCCCCCCGAGAAG	C	PASS	intron_variant	MODIFIER	SLC44A1	474792	transcript	XM_005626890.2	protein_coding	1	c.36+14931_36+14943delCCCCCCCGAGAAG
11	61135958	T	C	GATKstd	intron_variant	MODIFIER	SLC44A1	474792	transcript	XM_005626890.2	protein_coding	1	c.36+14947T>C
11	61537335	C	CTCTA	PASS	intron_variant	MODIFIER	TMEM38B	481654	transcript	XM_538776.6	protein_coding	2	c.222-863_222-862insTCTA
11	62092589	G	A	PASS	intergenic_region	MODIFIER	LOC111097957-LOC111097909	111097957-111097909	intergenic_region	111097957-111097909		-1	n.62092589G>A
11	63011756	G	A	GATKstd	intron_variant	MODIFIER	LOC111098119	111098119	transcript	XR_002631654.1	pseudogene	5	n.485-13347G>A
11	63089566	C	T	GATKstd	intron_variant	MODIFIER	LOC111098120	111098120	transcript	XR_002631658.1	pseudogene	1	n.66+20042C>T
11	67195601	T	G	GATKstd	intergenic_region	MODIFIER	INIP-SNX30	481671-481672	intergenic_region	481671-481672		-1	n.67195601T>G
11	68696472	T	G	GATKstd	intron_variant	MODIFIER	WHRN	612588	transcript	XM_005626956.3	protein_coding	1	c.672+2648A>C
11	68696472	T	G	GATKstd	intron_variant	MODIFIER	LOC111097889	111097889	transcript	XR_002631102.1	pseudogene	1	n.4042-1464T>G
11	68696472	T	G	GATKstd	intron_variant	MODIFIER	WHRN	612588	transcript	XM_005626954.3	protein_coding	1	c.672+2648A>C
11	68696472	T	G	GATKstd	intron_variant	MODIFIER	WHRN	612588	transcript	XM_014117952.2	protein_coding	1	c.672+2648A>C
11	68696472	T	G	GATKstd	intron_variant	MODIFIER	WHRN	612588	transcript	XM_850321.5	protein_coding	1	c.672+2648A>C
11	72198368	G	GGAAATTTTTTTTGTTTTTTGTTTTTTGTTTTTTTTTTTTTTTGGTAT	PASS	intergenic_region	MODIFIER	LOC102152863-BRINP1	102152863-481694	intergenic_region	102152863-481694		-1	n.72198368_72198369insGAAATTTTTTTTGTTTTTTGTTTTTTGTTTTTTTTTTTTTTTGGTAT
12	10961513	T	A	GATKstd	intron_variant	MODIFIER	TRERF1	608906	transcript	XM_014118440.2	protein_coding	3	c.-374+1082A>T
12	10961513	T	A	GATKstd	intron_variant	MODIFIER	TRERF1	608906	transcript	XM_022426048.1	protein_coding	2	c.-374+1082A>T
12	10961513	T	A	GATKstd	intron_variant	MODIFIER	TRERF1	608906	transcript	XM_014118443.2	protein_coding	3	c.-374+1082A>T
12	10961513	T	A	GATKstd	intron_variant	MODIFIER	TRERF1	608906	transcript	XM_005627351.3	protein_coding	3	c.-374+1082A>T
12	10961513	T	A	GATKstd	intron_variant	MODIFIER	TRERF1	608906	transcript	XM_005627357.3	protein_coding	3	c.-374+1082A>T
12	10961513	T	A	GATKstd	intron_variant	MODIFIER	TRERF1	608906	transcript	XM_846991.5	protein_coding	3	c.-374+1082A>T
12	10961513	T	A	GATKstd	intron_variant	MODIFIER	TRERF1	608906	transcript	XM_014118446.2	protein_coding	2	c.-373-55434A>T
12	10961513	T	A	GATKstd	intron_variant	MODIFIER	TRERF1	608906	transcript	XM_014118447.2	protein_coding	3	c.-374+1082A>T
12	10961513	T	A	GATKstd	intron_variant	MODIFIER	TRERF1	608906	transcript	XM_014118448.2	protein_coding	3	c.-374+1082A>T
12	10961513	T	A	GATKstd	intron_variant	MODIFIER	TRERF1	608906	transcript	XM_014118449.2	protein_coding	3	c.-374+1082A>T
12	10961513	T	A	GATKstd	intron_variant	MODIFIER	TRERF1	608906	transcript	XM_014118450.2	protein_coding	3	c.-374+1082A>T
12	10961513	T	A	GATKstd	intron_variant	MODIFIER	TRERF1	608906	transcript	XM_022426051.1	protein_coding	3	c.-374+1082A>T
12	10961513	T	A	GATKstd	intron_variant	MODIFIER	TRERF1	608906	transcript	XM_022426052.1	protein_coding	3	c.-374+1082A>T
12	10961513	T	A	GATKstd	intron_variant	MODIFIER	TRERF1	608906	transcript	XM_014118442.2	protein_coding	3	c.-374+1082A>T
12	10961513	T	A	GATKstd	intron_variant	MODIFIER	TRERF1	608906	transcript	XM_022426049.1	protein_coding	2	c.-373-55434A>T
12	10961513	T	A	GATKstd	intron_variant	MODIFIER	TRERF1	608906	transcript	XM_022426047.1	protein_coding	3	c.-374+1082A>T
12	10961513	T	A	GATKstd	intron_variant	MODIFIER	TRERF1	608906	transcript	XM_014118441.2	protein_coding	3	c.-374+1082A>T
12	10961513	T	A	GATKstd	intron_variant	MODIFIER	TRERF1	608906	transcript	XM_022426046.1	protein_coding	3	c.-374+1082A>T
12	18887725	G	T	PASS	intergenic_region	MODIFIER	LOC111098159-LOC111098280	111098159-111098280	intergenic_region	111098159-111098280		-1	n.18887725G>T
12	21258108	C	G	GATKstd	intron_variant	MODIFIER	LOC102151580	102151580	transcript	XM_005627483.3	protein_coding	1	c.613-30601G>C
12	22744121	A	T	PASS	downstream_gene_variant	MODIFIER	HMGCLL1	481852	transcript	XM_538973.6	protein_coding	-1	c.*5878T>A
12	22744121	A	T	PASS	downstream_gene_variant	MODIFIER	HMGCLL1	481852	transcript	XM_014118065.2	protein_coding	-1	c.*5878T>A
12	22744121	A	T	PASS	downstream_gene_variant	MODIFIER	HMGCLL1	481852	transcript	XM_014118066.2	protein_coding	-1	c.*5878T>A
12	22744121	A	T	PASS	downstream_gene_variant	MODIFIER	HMGCLL1	481852	transcript	XM_022426169.1	protein_coding	-1	c.*5878T>A
12	22744121	A	T	PASS	downstream_gene_variant	MODIFIER	HMGCLL1	481852	transcript	XM_022426168.1	protein_coding	-1	c.*5878T>A
12	22744121	A	T	PASS	intergenic_region	MODIFIER	GFRAL-HMGCLL1	481851-481852	intergenic_region	481851-481852		-1	n.22744121A>T
12	40402375	GC	G	PASS	intron_variant	MODIFIER	LOC111098329	111098329	transcript	XR_002632026.1	pseudogene	4	n.507-22081delC
12	54892349	A	C	PASS	intergenic_region	MODIFIER	FUT9-UFL1	449027-474999	intergenic_region	449027-474999		-1	n.54892349A>C
12	54892350	A	AAATT	PASS	intergenic_region	MODIFIER	FUT9-UFL1	449027-474999	intergenic_region	449027-474999		-1	n.54892350_54892351insAATT
12	54892352	A	ATT	PASS	intergenic_region	MODIFIER	FUT9-UFL1	449027-474999	intergenic_region	449027-474999		-1	n.54892352_54892353insTT
12	54892356	G	T	PASS	intergenic_region	MODIFIER	FUT9-UFL1	449027-474999	intergenic_region	449027-474999		-1	n.54892356G>T
12	55433243	A	G	GATKstd	intron_variant	MODIFIER	KLHL32	481929	transcript	XM_022426370.1	protein_coding	3	c.205-17853A>G
12	55433243	A	G	GATKstd	intron_variant	MODIFIER	KLHL32	481929	transcript	XM_022426376.1	protein_coding	3	c.205-17853A>G
12	55433243	A	G	GATKstd	intron_variant	MODIFIER	KLHL32	481929	transcript	XR_002632098.1	pseudogene	3	n.351-17853A>G
12	55433243	A	G	GATKstd	intron_variant	MODIFIER	KLHL32	481929	transcript	XM_022426371.1	protein_coding	3	c.204+26939A>G
12	55433243	A	G	GATKstd	intron_variant	MODIFIER	KLHL32	481929	transcript	XM_022426372.1	protein_coding	3	c.205-17853A>G
12	55433243	A	G	GATKstd	intron_variant	MODIFIER	KLHL32	481929	transcript	XM_022426374.1	protein_coding	3	c.205-17853A>G
12	55433243	A	G	GATKstd	intron_variant	MODIFIER	KLHL32	481929	transcript	XM_022426375.1	protein_coding	3	c.205-17853A>G
12	70464347	G	A	GATKstd	intergenic_region	MODIFIER	LOC111098408-LOC111098195	111098408-111098195	intergenic_region	111098408-111098195		-1	n.70464347G>A
13	41232169	C	CCCCACCCCGCCGCTGGAAGGCCCGCATCCAGGGCGGCGG	PASS	upstream_gene_variant	MODIFIER	GNPDA2	608049	transcript	XM_022426952.1	protein_coding	-1	c.-3638_-3637insCCGCCGCCCTGGATGCGGGCCTTCCAGCGGCGGGGTGGG
13	41232169	C	CCCCACCCCGCCGCTGGAAGGCCCGCATCCAGGGCGGCGG	PASS	upstream_gene_variant	MODIFIER	GNPDA2	608049	transcript	XM_014118789.1	protein_coding	-1	c.-3638_-3637insCCGCCGCCCTGGATGCGGGCCTTCCAGCGGCGGGGTGGG
13	41232169	C	CCCCACCCCGCCGCTGGAAGGCCCGCATCCAGGGCGGCGG	PASS	intergenic_region	MODIFIER	GNPDA2-LOC100856188	608049-100856188	intergenic_region	608049-100856188		-1	n.41232169_41232170insCCCACCCCGCCGCTGGAAGGCCCGCATCCAGGGCGGCGG
14	975141	G	A	GATKstd	intergenic_region	MODIFIER	WNT9A-PRSS38	482209-475179	intergenic_region	482209-475179		-1	n.975141G>A
14	1781545	T	G	GATKstd	intergenic_region	MODIFIER	LOC100856620-LOC482222	100856620-482222	intergenic_region	100856620-482222		-1	n.1781545T>G
14	6931549	T	C	GATKstd	intron_variant	MODIFIER	UBE2H	607816	transcript	XM_852326.5	protein_coding	1	c.53+18299T>C
14	6931549	T	C	GATKstd	intron_variant	MODIFIER	UBE2H	607816	transcript	XM_022427233.1	protein_coding	1	c.53+18299T>C
14	6931549	T	C	GATKstd	intron_variant	MODIFIER	UBE2H	607816	transcript	XM_005628390.3	protein_coding	1	c.53+18299T>C
14	6931549	T	C	GATKstd	intron_variant	MODIFIER	UBE2H	607816	transcript	XM_022427231.1	protein_coding	1	c.35+17809T>C
14	7200467	C	T	GATKstd	intron_variant	MODIFIER	NRF1	482260	transcript	XM_014119030.2	protein_coding	1	c.-10+18220G>A
14	7200467	C	T	GATKstd	intron_variant	MODIFIER	NRF1	482260	transcript	XM_014119035.2	protein_coding	1	c.-75-7433G>A
14	7200467	C	T	GATKstd	intron_variant	MODIFIER	NRF1	482260	transcript	XM_014119036.2	protein_coding	1	c.-7+18220G>A
14	35964975	G	T	PASS	intergenic_region	MODIFIER	LOC482348-RAPGEF5	482348-100855786	intergenic_region	482348-100855786		-1	n.35964975G>T
15	362699	G	A	GATKstd	intergenic_region	MODIFIER	LOC482436-SLC2A1	482436-482437	intergenic_region	482436-482437		-1	n.362699G>A
15	19747650	C	CCCCG	PASS	upstream_gene_variant	MODIFIER	LOC111098871	111098871	transcript	XM_022427677.1	protein_coding	-1	c.-542_-541insCGGG
15	19747650	C	CCCCG	PASS	intergenic_region	MODIFIER	LOC111098871-LOC111099013	111098871-111099013	intergenic_region	111098871-111099013		-1	n.19747650_19747651insCCCG
15	28225200	C	T	GATKstd	intergenic_region	MODIFIER	MGAT4C-LOC111098892	475418-111098892	intergenic_region	475418-111098892		-1	n.28225200C>T
15	30396204	CA	C	PASS	intron_variant	MODIFIER	POC1B	475422	transcript	XM_005629216.3	protein_coding	9	c.988-3672delT
15	30396204	CA	C	PASS	intron_variant	MODIFIER	POC1B	475422	transcript	XM_022403281.1	protein_coding	8	c.907-3672delT
15	30396204	CA	C	PASS	intron_variant	MODIFIER	POC1B	475422	transcript	XM_022403282.1	protein_coding	9	c.988-3672delT
15	30959639	A	G	GATKstd	intergenic_region	MODIFIER	LOC102154128-LOC102154182	102154128-102154182	intergenic_region	102154128-102154182		-1	n.30959639A>G
15	32832779	TGGTGGTGGTGGTGGTGGTGGG	T	PASS	intergenic_region	MODIFIER	LOC106559750-LOC111098900	106559750-111098900	intergenic_region	106559750-111098900		-1	n.32832780_32832800delGGTGGTGGTGGTGGTGGTGGG
15	33106844	G	A	GATKstd	intergenic_region	MODIFIER	C15H12orf74-PLEKHG7	102155524-100856679	intergenic_region	102155524-100856679		-1	n.33106844G>A
15	33500801	A	AC	PASS	intron_variant	MODIFIER	LOC111090036	111090036	transcript	XM_022403288.1	protein_coding	3	c.322+16885_322+16886insG
15	33500801	A	AC	PASS	intron_variant	MODIFIER	LOC111090036	111090036	transcript	XR_002614123.1	pseudogene	4	n.693+16885_693+16886insG
15	33500801	A	AC	PASS	intron_variant	MODIFIER	LOC111090036	111090036	transcript	XM_022403296.1	protein_coding	3	c.322+16885_322+16886insG
15	33500801	A	AC	PASS	intron_variant	MODIFIER	LOC111090036	111090036	transcript	XR_002614112.1	pseudogene	3	n.644+16885_644+16886insG
15	33500801	A	AC	PASS	intron_variant	MODIFIER	LOC111090036	111090036	transcript	XR_002614113.1	pseudogene	3	n.644+16885_644+16886insG
15	33500801	A	AC	PASS	intron_variant	MODIFIER	LOC111090036	111090036	transcript	XR_002614114.1	pseudogene	3	n.644+16885_644+16886insG
15	33500801	A	AC	PASS	intron_variant	MODIFIER	LOC111090036	111090036	transcript	XM_022403304.1	protein_coding	3	c.322+16885_322+16886insG
15	33500801	A	AC	PASS	intron_variant	MODIFIER	LOC111090036	111090036	transcript	XM_022403297.1	protein_coding	3	c.322+16885_322+16886insG
15	33500801	A	AC	PASS	intron_variant	MODIFIER	LOC111090036	111090036	transcript	XM_022403299.1	protein_coding	3	c.322+16885_322+16886insG
15	33500801	A	AC	PASS	intron_variant	MODIFIER	LOC111090036	111090036	transcript	XM_022403301.1	protein_coding	3	c.322+16885_322+16886insG
15	33500801	A	AC	PASS	intron_variant	MODIFIER	LOC111090036	111090036	transcript	XR_002614121.1	pseudogene	3	n.387+16885_387+16886insG
15	33500801	A	AC	PASS	intron_variant	MODIFIER	LOC111090036	111090036	transcript	XR_002614120.1	pseudogene	4	n.445+16885_445+16886insG
15	33500801	A	AC	PASS	intron_variant	MODIFIER	LOC111090036	111090036	transcript	XR_002614118.1	pseudogene	4	n.775+16885_775+16886insG
15	33500801	A	AC	PASS	intron_variant	MODIFIER	LOC111090036	111090036	transcript	XR_002614119.1	pseudogene	4	n.509+16885_509+16886insG
15	33500801	A	AC	PASS	intron_variant	MODIFIER	LOC111090036	111090036	transcript	XR_002614122.1	pseudogene	4	n.464+16885_464+16886insG
15	33500801	A	AC	PASS	intron_variant	MODIFIER	LOC111090036	111090036	transcript	XR_002614115.1	pseudogene	3	n.644+16885_644+16886insG
15	33500801	A	AC	PASS	intron_variant	MODIFIER	LOC111090036	111090036	transcript	XM_022403295.1	protein_coding	3	c.322+16885_322+16886insG
15	33500801	A	AC	PASS	intron_variant	MODIFIER	LOC111090036	111090036	transcript	XM_022403300.1	protein_coding	3	c.322+16885_322+16886insG
15	33500801	A	AC	PASS	intron_variant	MODIFIER	LOC111090036	111090036	transcript	XM_022403302.1	protein_coding	3	c.322+16885_322+16886insG
15	33500801	A	AC	PASS	intron_variant	MODIFIER	LOC111090036	111090036	transcript	XM_022403294.1	protein_coding	5	c.310+16885_310+16886insG
15	33500801	A	AC	PASS	intron_variant	MODIFIER	LOC111090036	111090036	transcript	XM_022403290.1	protein_coding	6	c.310+16885_310+16886insG
15	33500801	A	AC	PASS	intron_variant	MODIFIER	LOC111090036	111090036	transcript	XM_022403291.1	protein_coding	6	c.310+16885_310+16886insG
15	33500801	A	AC	PASS	intron_variant	MODIFIER	LOC111090036	111090036	transcript	XM_022403292.1	protein_coding	6	c.310+16885_310+16886insG
15	33500801	A	AC	PASS	intron_variant	MODIFIER	LOC111090036	111090036	transcript	XM_022403293.1	protein_coding	5	c.310+16885_310+16886insG
15	33500801	A	AC	PASS	intron_variant	MODIFIER	LOC111090036	111090036	transcript	XR_002614116.1	pseudogene	7	n.1841+16885_1841+16886insG
15	33500801	A	AC	PASS	intron_variant	MODIFIER	LOC111090036	111090036	transcript	XR_002614117.1	pseudogene	7	n.1841+16885_1841+16886insG
15	33500801	A	AC	PASS	intron_variant	MODIFIER	LOC111090036	111090036	transcript	XR_002614124.1	pseudogene	7	n.1841+16885_1841+16886insG
15	33500801	A	AC	PASS	intron_variant	MODIFIER	LOC111090036	111090036	transcript	XM_022403303.1	protein_coding	3	c.322+16885_322+16886insG
15	34616658	A	G	PASS	intergenic_region	MODIFIER	LOC102156774-TMCC3	102156774-482607	intergenic_region	102156774-482607		-1	n.34616658A>G
15	43583274	AC	A	PASS	intron_variant	MODIFIER	ANAPC10	475453	transcript	XR_001317786.2	pseudogene	4	n.543-4002delG
15	43583274	AC	A	PASS	intron_variant	MODIFIER	ANAPC10	475453	transcript	XR_002614258.1	pseudogene	4	n.543-4002delG
15	43583274	AC	A	PASS	intron_variant	MODIFIER	ANAPC10	475453	transcript	XR_002614259.1	pseudogene	4	n.543-4002delG
15	43583274	AC	A	PASS	intron_variant	MODIFIER	ANAPC10	475453	transcript	XM_022403454.1	protein_coding	4	c.328-936delG
15	43598989	T	A	GATKstd	intron_variant	MODIFIER	ANAPC10	475453	transcript	XR_001317786.2	pseudogene	4	n.543-19716A>T
15	43598989	T	A	GATKstd	intron_variant	MODIFIER	ANAPC10	475453	transcript	XR_002614258.1	pseudogene	4	n.543-19716A>T
15	43598989	T	A	GATKstd	intron_variant	MODIFIER	ANAPC10	475453	transcript	XR_002614259.1	pseudogene	4	n.543-19716A>T
15	43598989	T	A	GATKstd	intron_variant	MODIFIER	ANAPC10	475453	transcript	XM_022403454.1	protein_coding	4	c.328-16650A>T
15	43602477	A	G	PASS	intron_variant	MODIFIER	ANAPC10	475453	transcript	XR_001317786.2	pseudogene	4	n.543-23204T>C
15	43602477	A	G	PASS	intron_variant	MODIFIER	ANAPC10	475453	transcript	XR_002614258.1	pseudogene	4	n.543-23204T>C
15	43602477	A	G	PASS	intron_variant	MODIFIER	ANAPC10	475453	transcript	XR_002614259.1	pseudogene	4	n.543-23204T>C
15	43602477	A	G	PASS	intron_variant	MODIFIER	ANAPC10	475453	transcript	XM_022403454.1	protein_coding	4	c.328-20138T>C
15	43672148	G	A	PASS	intron_variant	MODIFIER	ANAPC10	475453	transcript	XR_001317786.2	pseudogene	4	n.542+72133C>T
15	43672148	G	A	PASS	intron_variant	MODIFIER	ANAPC10	475453	transcript	XR_002614258.1	pseudogene	4	n.542+72133C>T
15	43672148	G	A	PASS	intron_variant	MODIFIER	ANAPC10	475453	transcript	XR_002614259.1	pseudogene	4	n.542+72133C>T
15	43672148	G	A	PASS	intron_variant	MODIFIER	ANAPC10	475453	transcript	XM_022403454.1	protein_coding	4	c.327+72133C>T
15	43708485	C	T	PASS	intron_variant	MODIFIER	ANAPC10	475453	transcript	XM_005629309.3	protein_coding	4	c.328-14131G>A
15	43708485	C	T	PASS	intron_variant	MODIFIER	ANAPC10	475453	transcript	XR_001317786.2	pseudogene	4	n.542+35796G>A
15	43708485	C	T	PASS	intron_variant	MODIFIER	ANAPC10	475453	transcript	XR_002614258.1	pseudogene	4	n.542+35796G>A
15	43708485	C	T	PASS	intron_variant	MODIFIER	ANAPC10	475453	transcript	XR_002614259.1	pseudogene	4	n.542+35796G>A
15	43708485	C	T	PASS	intron_variant	MODIFIER	ANAPC10	475453	transcript	XM_022403454.1	protein_coding	4	c.327+35796G>A
15	43708485	C	T	PASS	intron_variant	MODIFIER	ANAPC10	475453	transcript	XM_022403450.1	protein_coding	4	c.328-14131G>A
15	43708485	C	T	PASS	intron_variant	MODIFIER	ANAPC10	475453	transcript	XM_014119540.2	protein_coding	4	c.328-14131G>A
15	43708485	C	T	PASS	intron_variant	MODIFIER	ANAPC10	475453	transcript	XM_532678.6	protein_coding	4	c.328-14131G>A
15	43708485	C	T	PASS	intron_variant	MODIFIER	ANAPC10	475453	transcript	XM_022403453.1	protein_coding	4	c.328-10892G>A
15	43967889	T	C	GATKstd	intergenic_region	MODIFIER	LOC106559733-SMAD1	106559733-475456	intergenic_region	106559733-475456		-1	n.43967889T>C
15	45519420	C	T	GATKstd	intron_variant	MODIFIER	LOC111090082	111090082	transcript	XR_002614295.1	pseudogene	4	n.486+31622G>A
15	45519420	C	T	GATKstd	intron_variant	MODIFIER	LOC111090082	111090082	transcript	XR_002614296.1	pseudogene	2	n.261-34966G>A
15	46105141	T	G	GATKstd	intron_variant	MODIFIER	ARHGAP10	482639	transcript	XM_022403482.1	protein_coding	1	c.154+34513T>G
15	46105141	T	G	GATKstd	intron_variant	MODIFIER	ARHGAP10	482639	transcript	XM_022403483.1	protein_coding	1	c.40+40533T>G
15	46105141	T	G	GATKstd	intron_variant	MODIFIER	ARHGAP10	482639	transcript	XM_022403484.1	protein_coding	1	c.154+34513T>G
15	46105141	T	G	GATKstd	intron_variant	MODIFIER	ARHGAP10	482639	transcript	XM_539757.5	protein_coding	1	c.154+34513T>G
15	52515414	T	C	GATKstd	intergenic_region	MODIFIER	RBM46-LOC111098917	475475-111098917	intergenic_region	475475-111098917		-1	n.52515414T>C
15	52736527	C	T	PASS	intron_variant	MODIFIER	LOC111098918	111098918	transcript	XR_002633251.1	pseudogene	4	n.321-8253C>T
15	52763484	G	A	PASS	intergenic_region	MODIFIER	LOC111098918-NPY2R	111098918-482661	intergenic_region	111098918-482661		-1	n.52763484G>A
15	52783352	T	G	PASS	intergenic_region	MODIFIER	LOC111098918-NPY2R	111098918-482661	intergenic_region	111098918-482661		-1	n.52783352T>G
15	52802594	CCTCT	C	PASS	downstream_gene_variant	MODIFIER	NPY2R	482661	transcript	XM_005629373.3	protein_coding	-1	c.*6777_*6780delCTCT
15	52802594	CCTCT	C	PASS	intergenic_region	MODIFIER	NPY2R-LOC111090108	482661-111090108	intergenic_region	482661-111090108		-1	n.52802595_52802598delCTCT
15	53266022	T	G	GATKstd	upstream_gene_variant	MODIFIER	GUCY1B3	553102	transcript	NM_001018034.2	protein_coding	-1	c.-221T>G
15	53266022	T	G	GATKstd	intergenic_region	MODIFIER	GUCY1A3-GUCY1B3	482663-553102	intergenic_region	482663-553102		-1	n.53266022T>G
16	33430973	T	TTTA	PASS	intron_variant	MODIFIER	TEX15	100686345	transcript	XM_022404083.1	protein_coding	1	c.-147+7336_-147+7337insTTA
16	33430973	T	TTTA	PASS	intron_variant	MODIFIER	TEX15	100686345	transcript	XM_022404085.1	protein_coding	1	c.-89+7336_-89+7337insTTA
16	33430973	T	TTTA	PASS	intron_variant	MODIFIER	TEX15	100686345	transcript	XM_005629891.3	protein_coding	1	c.-89+6201_-89+6202insTTA
16	33430973	T	TTTA	PASS	intron_variant	MODIFIER	TEX15	100686345	transcript	XM_022404084.1	protein_coding	1	c.-147+6201_-147+6202insTTA
16	38154472	T	TA	PASS	intron_variant	MODIFIER	SGCZ	482890	transcript	XM_022404125.1	protein_coding	1	c.40-244099_40-244098insT
16	39414376	C	T	PASS	intergenic_region	MODIFIER	LOC111090176-MSR1	111090176-482891	intergenic_region	111090176-482891		-1	n.39414376C>T
16	42592144	T	C	PASS	intergenic_region	MODIFIER	LOC100688919-TRIML1	100688919-475619	intergenic_region	100688919-475619		-1	n.42592144T>C
16	42633791	G	A	PASS	intergenic_region	MODIFIER	LOC100688919-TRIML1	100688919-475619	intergenic_region	100688919-475619		-1	n.42633791G>A
16	42853680	G	A	GATKstd	intergenic_region	MODIFIER	LOC100688919-TRIML1	100688919-475619	intergenic_region	100688919-475619		-1	n.42853680G>A
16	42917191	C	T	GATKstd	intergenic_region	MODIFIER	LOC100688919-TRIML1	100688919-475619	intergenic_region	100688919-475619		-1	n.42917191C>T
16	47858718	T	TC	PASS	intron_variant	MODIFIER	TENM3	475637	transcript	XM_022404243.1	protein_coding	2	c.511+3583_511+3584insG
16	47858718	T	TC	PASS	intron_variant	MODIFIER	TENM3	475637	transcript	XM_022404244.1	protein_coding	2	c.511+3583_511+3584insG
16	47858718	T	TC	PASS	intron_variant	MODIFIER	TENM3	475637	transcript	XM_022404245.1	protein_coding	2	c.511+3583_511+3584insG
16	47858718	T	TC	PASS	intron_variant	MODIFIER	TENM3	475637	transcript	XM_022404246.1	protein_coding	2	c.511+3583_511+3584insG
16	47858718	T	TC	PASS	intron_variant	MODIFIER	TENM3	475637	transcript	XM_022404247.1	protein_coding	2	c.511+3583_511+3584insG
16	47858718	T	TC	PASS	intron_variant	MODIFIER	TENM3	475637	transcript	XM_022404248.1	protein_coding	2	c.511+3583_511+3584insG
16	47858718	T	TC	PASS	intron_variant	MODIFIER	TENM3	475637	transcript	XM_022404249.1	protein_coding	2	c.511+3583_511+3584insG
16	47858718	T	TC	PASS	intron_variant	MODIFIER	TENM3	475637	transcript	XM_022404250.1	protein_coding	1	c.232+24287_232+24288insG
16	53429937	AAAAAAG	A	PASS	intron_variant	MODIFIER	WDR17	482934	transcript	XM_014120173.2	protein_coding	4	c.379+642_379+647delCTTTTT
16	53429937	AAAAAAG	A	PASS	intron_variant	MODIFIER	WDR17	482934	transcript	XM_014120174.2	protein_coding	4	c.379+642_379+647delCTTTTT
16	53429937	AAAAAAG	A	PASS	intron_variant	MODIFIER	WDR17	482934	transcript	XM_014120175.2	protein_coding	4	c.379+642_379+647delCTTTTT
16	53448512	A	G	PASS	intron_variant	MODIFIER	WDR17	482934	transcript	XM_014120173.2	protein_coding	2	c.66+297T>C
16	53448512	A	G	PASS	intron_variant	MODIFIER	WDR17	482934	transcript	XM_014120174.2	protein_coding	2	c.66+297T>C
16	53448512	A	G	PASS	intron_variant	MODIFIER	WDR17	482934	transcript	XM_014120175.2	protein_coding	2	c.66+297T>C
16	53583782	A	T	PASS	synonymous_variant	LOW	LOC482936	482936	transcript	XM_014120158.2	protein_coding	2	c.105T>A	p.Thr35Thr
16	58952865	T	TCC	PASS	upstream_gene_variant	MODIFIER	LOC111090369	111090369	transcript	XR_002614828.1	pseudogene	-1	n.-1521_-1520insCC
16	58952865	T	TCC	PASS	upstream_gene_variant	MODIFIER	LOC111090369	111090369	transcript	XR_002614830.1	pseudogene	-1	n.-3576_-3575insCC
16	58952865	T	TCC	PASS	upstream_gene_variant	MODIFIER	LOC111090369	111090369	transcript	XR_002614822.1	pseudogene	-1	n.-3637_-3636insCC
16	58952865	T	TCC	PASS	downstream_gene_variant	MODIFIER	DEFB4A	100135059	transcript	NM_001113715.1	protein_coding	-1	c.*1106_*1107insGG
16	58952865	T	TCC	PASS	intron_variant	MODIFIER	LOC111090369	111090369	transcript	XR_002614829.1	pseudogene	2	n.464-1126_464-1125insCC
16	58952865	T	TCC	PASS	intron_variant	MODIFIER	LOC111090369	111090369	transcript	XR_002614821.1	pseudogene	2	n.464-1126_464-1125insCC
16	58952865	T	TCC	PASS	intron_variant	MODIFIER	LOC111090369	111090369	transcript	XR_002614823.1	pseudogene	2	n.463+1284_463+1285insCC
16	58952865	T	TCC	PASS	intron_variant	MODIFIER	LOC111090369	111090369	transcript	XR_002614825.1	pseudogene	2	n.464-1126_464-1125insCC
16	58952865	T	TCC	PASS	intron_variant	MODIFIER	LOC111090369	111090369	transcript	XR_002614824.1	pseudogene	1	n.254-1126_254-1125insCC
16	58952865	T	TCC	PASS	intron_variant	MODIFIER	LOC111090369	111090369	transcript	XR_002614827.1	pseudogene	1	n.250-2747_250-2746insCC
16	58952865	T	TCC	PASS	intron_variant	MODIFIER	LOC111090369	111090369	transcript	XR_002614831.1	pseudogene	1	n.250-4094_250-4093insCC
16	58952865	T	TCC	PASS	intron_variant	MODIFIER	LOC111090369	111090369	transcript	XR_002614826.1	pseudogene	1	n.246-4094_246-4093insCC
16	58952867	A	AGTTACT	PASS	upstream_gene_variant	MODIFIER	LOC111090369	111090369	transcript	XR_002614828.1	pseudogene	-1	n.-1519_-1518insGTTACT
16	58952867	A	AGTTACT	PASS	upstream_gene_variant	MODIFIER	LOC111090369	111090369	transcript	XR_002614830.1	pseudogene	-1	n.-3574_-3573insGTTACT
16	58952867	A	AGTTACT	PASS	upstream_gene_variant	MODIFIER	LOC111090369	111090369	transcript	XR_002614822.1	pseudogene	-1	n.-3635_-3634insGTTACT
16	58952867	A	AGTTACT	PASS	downstream_gene_variant	MODIFIER	DEFB4A	100135059	transcript	NM_001113715.1	protein_coding	-1	c.*1104_*1105insAGTAAC
16	58952867	A	AGTTACT	PASS	intron_variant	MODIFIER	LOC111090369	111090369	transcript	XR_002614829.1	pseudogene	2	n.464-1124_464-1123insGTTACT
16	58952867	A	AGTTACT	PASS	intron_variant	MODIFIER	LOC111090369	111090369	transcript	XR_002614821.1	pseudogene	2	n.464-1124_464-1123insGTTACT
16	58952867	A	AGTTACT	PASS	intron_variant	MODIFIER	LOC111090369	111090369	transcript	XR_002614823.1	pseudogene	2	n.463+1286_463+1287insGTTACT
16	58952867	A	AGTTACT	PASS	intron_variant	MODIFIER	LOC111090369	111090369	transcript	XR_002614825.1	pseudogene	2	n.464-1124_464-1123insGTTACT
16	58952867	A	AGTTACT	PASS	intron_variant	MODIFIER	LOC111090369	111090369	transcript	XR_002614824.1	pseudogene	1	n.254-1124_254-1123insGTTACT
16	58952867	A	AGTTACT	PASS	intron_variant	MODIFIER	LOC111090369	111090369	transcript	XR_002614827.1	pseudogene	1	n.250-2745_250-2744insGTTACT
16	58952867	A	AGTTACT	PASS	intron_variant	MODIFIER	LOC111090369	111090369	transcript	XR_002614831.1	pseudogene	1	n.250-4092_250-4091insGTTACT
16	58952867	A	AGTTACT	PASS	intron_variant	MODIFIER	LOC111090369	111090369	transcript	XR_002614826.1	pseudogene	1	n.246-4092_246-4091insGTTACT
17	15026395	G	GGTCCTAGTACAAAGGAAAGAGGTATATCCCCAACCAGACACCCATCTAGGGA	PASS	intron_variant	MODIFIER	LOC111090517	111090517	transcript	XR_002615063.1	pseudogene	2	n.123-3836_123-3835insGTCCTAGTACAAAGGAAAGAGGTATATCCCCAACCAGACACCCATCTAGGGA
17	15026395	G	GGTCCTAGTACAAAGGAAAGAGGTATATCCCCAACCAGACACCCATCTAGGGA	PASS	intron_variant	MODIFIER	WDR35	475677	transcript	XM_005630164.2	protein_coding	5	c.437-686_437-685insTCCCTAGATGGGTGTCTGGTTGGGGATATACCTCTTTCCTTTGTACTAGGAC
17	15026395	G	GGTCCTAGTACAAAGGAAAGAGGTATATCCCCAACCAGACACCCATCTAGGGA	PASS	intron_variant	MODIFIER	WDR35	475677	transcript	XM_532884.5	protein_coding	5	c.437-686_437-685insTCCCTAGATGGGTGTCTGGTTGGGGATATACCTCTTTCCTTTGTACTAGGAC
17	24453076	A	G	PASS	intergenic_region	MODIFIER	CAPN13-GALNT14	483024-483025	intergenic_region	483024-483025		-1	n.24453076A>G
17	24817115	TA	T	PASS	upstream_gene_variant	MODIFIER	CAPN14	483026	transcript	XM_022404617.1	protein_coding	-1	c.-4398delT
17	24817115	TA	T	PASS	intergenic_region	MODIFIER	CAPN14-EHD3	483026-611260	intergenic_region	483026-611260		-1	n.24817116delA
17	24817285	A	G	PASS	upstream_gene_variant	MODIFIER	CAPN14	483026	transcript	XM_022404617.1	protein_coding	-1	c.-4567T>C
17	24817285	A	G	PASS	intergenic_region	MODIFIER	CAPN14-EHD3	483026-611260	intergenic_region	483026-611260		-1	n.24817285A>G
17	24980809	A	G	PASS	intergenic_region	MODIFIER	XDH-SRD5A2	483028-403715	intergenic_region	483028-403715		-1	n.24980809A>G
17	25043159	C	T	PASS	upstream_gene_variant	MODIFIER	LOC102156534	102156534	transcript	XR_294508.2	pseudogene	-1	n.-136C>T
17	25043159	C	T	PASS	intron_variant	MODIFIER	SRD5A2	403715	transcript	NM_001287064.1	protein_coding	1	c.281+12717G>A
17	25188999	CGG	C	PASS	intergenic_region	MODIFIER	SRD5A2-MEMO1	403715-483029	intergenic_region	403715-483029		-1	n.25189000_25189001delGG
17	25205003	A	T	GATKstd	intergenic_region	MODIFIER	SRD5A2-MEMO1	403715-483029	intergenic_region	403715-483029		-1	n.25205003A>T
17	25273912	CACAA	C	PASS	intron_variant	MODIFIER	MEMO1	483029	transcript	XM_014120427.2	protein_coding	4	c.292+376_292+379delTTGT
17	25399916	G	A	PASS	intron_variant	MODIFIER	SPAST	608582	transcript	XM_845880.5	protein_coding	1	c.439+6056G>A
17	25399916	G	A	PASS	intron_variant	MODIFIER	SPAST	608582	transcript	XM_857738.5	protein_coding	1	c.439+6056G>A
17	25399916	G	A	PASS	intron_variant	MODIFIER	SPAST	608582	transcript	XM_005630315.3	protein_coding	1	c.439+6056G>A
17	25400054	G	A	PASS	intron_variant	MODIFIER	SPAST	608582	transcript	XM_845880.5	protein_coding	1	c.439+6194G>A
17	25400054	G	A	PASS	intron_variant	MODIFIER	SPAST	608582	transcript	XM_857738.5	protein_coding	1	c.439+6194G>A
17	25400054	G	A	PASS	intron_variant	MODIFIER	SPAST	608582	transcript	XM_005630315.3	protein_coding	1	c.439+6194G>A
17	25474709	TATG	T	PASS	intron_variant	MODIFIER	SLC30A6	475716	transcript	XM_022404618.1	protein_coding	9	c.654-88_654-86delATG
17	25474709	TATG	T	PASS	intron_variant	MODIFIER	SLC30A6	475716	transcript	XM_532924.6	protein_coding	9	c.546-88_546-86delATG
17	25474709	TATG	T	PASS	intron_variant	MODIFIER	SLC30A6	475716	transcript	XM_022404619.1	protein_coding	9	c.653+292_653+294delATG
17	25519799	C	T	PASS	upstream_gene_variant	MODIFIER	NLRC4	102153882	transcript	XM_014120238.2	protein_coding	-1	c.-1825G>A
17	25519799	C	T	PASS	intergenic_region	MODIFIER	NLRC4-LOC100688941	102153882-100688941	intergenic_region	102153882-100688941		-1	n.25519799C>T
17	25541050	T	C	PASS	non_coding_transcript_exon_variant	MODIFIER	LOC100688941	100688941	transcript	100688941	pseudogene	1	n.436T>C
17	25669490	T	A	PASS	intron_variant	MODIFIER	BIRC6	475718	transcript	XM_014120337.2	protein_coding	9	c.1229-321T>A
17	25871594	C	G	PASS	intron_variant	MODIFIER	TTC27	475719	transcript	XM_532927.5	protein_coding	4	c.549+1905C>G
17	25935577	C	T	PASS	intron_variant	MODIFIER	TTC27	475719	transcript	XM_532927.5	protein_coding	9	c.1132-690C>T
17	25990428	C	A	PASS	intron_variant	MODIFIER	TTC27	475719	transcript	XM_532927.5	protein_coding	13	c.1692+6259C>A
17	26513476	AAGG	A	PASS	intron_variant	MODIFIER	LTBP1	475720	transcript	XM_005630317.3	protein_coding	31	c.4280-1828_4280-1826delAGG
17	26513476	AAGG	A	PASS	intron_variant	MODIFIER	LTBP1	475720	transcript	XM_022404624.1	protein_coding	31	c.4109-1828_4109-1826delAGG
17	26513476	AAGG	A	PASS	intron_variant	MODIFIER	LTBP1	475720	transcript	XM_005630318.3	protein_coding	31	c.4229-1828_4229-1826delAGG
17	26513476	AAGG	A	PASS	intron_variant	MODIFIER	LTBP1	475720	transcript	XM_005630319.3	protein_coding	30	c.4154-1828_4154-1826delAGG
17	26513476	AAGG	A	PASS	intron_variant	MODIFIER	LTBP1	475720	transcript	XM_005630320.3	protein_coding	31	c.4121-1828_4121-1826delAGG
17	26513476	AAGG	A	PASS	intron_variant	MODIFIER	LTBP1	475720	transcript	XM_022404620.1	protein_coding	30	c.4157-1828_4157-1826delAGG
17	26513476	AAGG	A	PASS	intron_variant	MODIFIER	LTBP1	475720	transcript	XM_022404621.1	protein_coding	30	c.4112-1828_4112-1826delAGG
17	26513476	AAGG	A	PASS	intron_variant	MODIFIER	LTBP1	475720	transcript	XM_022404622.1	protein_coding	30	c.4061-1828_4061-1826delAGG
17	26513476	AAGG	A	PASS	intron_variant	MODIFIER	LTBP1	475720	transcript	XM_022404623.1	protein_coding	29	c.4010-1828_4010-1826delAGG
17	26513476	AAGG	A	PASS	intron_variant	MODIFIER	LTBP1	475720	transcript	XM_014120440.2	protein_coding	26	c.3602-1828_3602-1826delAGG
17	26513476	AAGG	A	PASS	intron_variant	MODIFIER	LTBP1	475720	transcript	XM_014120439.2	protein_coding	27	c.3728-1828_3728-1826delAGG
17	26513476	AAGG	A	PASS	intron_variant	MODIFIER	LTBP1	475720	transcript	XM_014120441.2	protein_coding	27	c.3569-1828_3569-1826delAGG
17	26513476	AAGG	A	PASS	intron_variant	MODIFIER	LTBP1	475720	transcript	XM_014120442.2	protein_coding	26	c.3443-1828_3443-1826delAGG
17	28504634	C	T	PASS	intergenic_region	MODIFIER	LOC111090428-LOC111090429	111090428-111090429	intergenic_region	111090428-111090429		-1	n.28504634C>T
17	31586438	A	T	PASS	intron_variant	MODIFIER	LOC111090431	111090431	transcript	XR_002614872.1	pseudogene	2	n.257+12915A>T
17	57408465	T	C	GATKstd	upstream_gene_variant	MODIFIER	LOC102155067	102155067	transcript	XM_014120605.2	protein_coding	-1	c.-2282T>C
17	57408465	T	C	GATKstd	intron_variant	MODIFIER	LOC608055	608055	transcript	XM_844942.5	protein_coding	1	c.138+1686A>G
18	18854056	T	G	GATKstd	intron_variant	MODIFIER	MAGI2	475904	transcript	XM_022405247.1	protein_coding	2	c.163+75889A>C
18	18854056	T	G	GATKstd	intron_variant	MODIFIER	MAGI2	475904	transcript	XM_022405251.1	protein_coding	2	c.163+75889A>C
18	18854056	T	G	GATKstd	intron_variant	MODIFIER	MAGI2	475904	transcript	XM_022405248.1	protein_coding	2	c.163+75889A>C
18	18854056	T	G	GATKstd	intron_variant	MODIFIER	MAGI2	475904	transcript	XM_022405255.1	protein_coding	2	c.163+75889A>C
18	18854056	T	G	GATKstd	intron_variant	MODIFIER	MAGI2	475904	transcript	XM_022405257.1	protein_coding	2	c.163+75889A>C
18	18854056	T	G	GATKstd	intron_variant	MODIFIER	MAGI2	475904	transcript	XM_022405256.1	protein_coding	2	c.163+75889A>C
18	18854056	T	G	GATKstd	intron_variant	MODIFIER	MAGI2	475904	transcript	XM_022405249.1	protein_coding	2	c.163+75889A>C
18	18854056	T	G	GATKstd	intron_variant	MODIFIER	MAGI2	475904	transcript	XM_022405250.1	protein_coding	2	c.163+75889A>C
18	18854056	T	G	GATKstd	intron_variant	MODIFIER	MAGI2	475904	transcript	XM_022405252.1	protein_coding	2	c.163+75889A>C
18	18854056	T	G	GATKstd	intron_variant	MODIFIER	MAGI2	475904	transcript	XM_022405254.1	protein_coding	2	c.163+75889A>C
18	18854056	T	G	GATKstd	intron_variant	MODIFIER	MAGI2	475904	transcript	XM_022405253.1	protein_coding	2	c.163+75889A>C
18	18950461	G	A	PASS	intron_variant	MODIFIER	MAGI2	475904	transcript	XM_022405247.1	protein_coding	1	c.47-20400C>T
18	18950461	G	A	PASS	intron_variant	MODIFIER	MAGI2	475904	transcript	XM_022405251.1	protein_coding	1	c.47-20400C>T
18	18950461	G	A	PASS	intron_variant	MODIFIER	MAGI2	475904	transcript	XM_022405248.1	protein_coding	1	c.47-20400C>T
18	18950461	G	A	PASS	intron_variant	MODIFIER	MAGI2	475904	transcript	XM_022405255.1	protein_coding	1	c.47-20400C>T
18	18950461	G	A	PASS	intron_variant	MODIFIER	MAGI2	475904	transcript	XM_022405257.1	protein_coding	1	c.47-20400C>T
18	18950461	G	A	PASS	intron_variant	MODIFIER	MAGI2	475904	transcript	XM_022405256.1	protein_coding	1	c.47-20400C>T
18	18950461	G	A	PASS	intron_variant	MODIFIER	MAGI2	475904	transcript	XM_022405249.1	protein_coding	1	c.47-20400C>T
18	18950461	G	A	PASS	intron_variant	MODIFIER	MAGI2	475904	transcript	XM_022405250.1	protein_coding	1	c.47-20400C>T
18	18950461	G	A	PASS	intron_variant	MODIFIER	MAGI2	475904	transcript	XM_022405252.1	protein_coding	1	c.47-20400C>T
18	18950461	G	A	PASS	intron_variant	MODIFIER	MAGI2	475904	transcript	XM_022405254.1	protein_coding	1	c.47-20400C>T
18	18950461	G	A	PASS	intron_variant	MODIFIER	MAGI2	475904	transcript	XM_022405253.1	protein_coding	1	c.47-20400C>T
18	24556684	A	T	GATKstd	intergenic_region	MODIFIER	LOC111090920-LOC111090831	111090920-111090831	intergenic_region	111090920-111090831		-1	n.24556684A>T
18	50282932	A	AGG	PASS	upstream_gene_variant	MODIFIER	KDM2A	483702	transcript	XM_022405603.1	protein_coding	-1	c.-564_-563insCC
18	50282932	A	AGG	PASS	intron_variant	MODIFIER	KDM2A	483702	transcript	XM_022405601.1	protein_coding	2	c.42+8072_42+8073insCC
18	50282932	A	AGG	PASS	intron_variant	MODIFIER	KDM2A	483702	transcript	XM_022405605.1	protein_coding	1	c.-10+25_-10+26insCC
18	50282932	A	AGG	PASS	intron_variant	MODIFIER	KDM2A	483702	transcript	XM_022405604.1	protein_coding	2	c.-10+2120_-10+2121insCC
18	50282932	A	AGG	PASS	intron_variant	MODIFIER	KDM2A	483702	transcript	XM_860009.5	protein_coding	2	c.42+8072_42+8073insCC
18	50282932	A	AGG	PASS	intron_variant	MODIFIER	KDM2A	483702	transcript	XM_022405602.1	protein_coding	1	c.39+476_39+477insCC
19	15572863	C	T	GATKstd	intergenic_region	MODIFIER	LOC102153490-TRNAG-UCC	102153490-111091207	intergenic_region	102153490-111091207		-1	n.15572863C>T
19	16139534	G	C	PASS	intron_variant	MODIFIER	LOC111091114	111091114	transcript	XR_002616201.1	pseudogene	3	n.861-12761G>C
19	16139534	G	C	PASS	intron_variant	MODIFIER	LOC111091114	111091114	transcript	XR_002616202.1	pseudogene	3	n.861-12761G>C
19	16139534	G	C	PASS	intron_variant	MODIFIER	LOC111091114	111091114	transcript	XR_002616203.1	pseudogene	3	n.861-12761G>C
19	16210911	G	A	PASS	intergenic_region	MODIFIER	LOC111091114-LOC111091115	111091114-111091115	intergenic_region	111091114-111091115		-1	n.16210911G>A
19	17024078	C	T	PASS	intron_variant	MODIFIER	SPATA5	483840	transcript	XR_002616206.1	pseudogene	15	n.2568-2721G>A
19	18542531	G	A	GATKstd	intergenic_region	MODIFIER	ANXA5-QRFPR	476094-483846	intergenic_region	476094-483846		-1	n.18542531G>A
19	19103993	C	T	PASS	intergenic_region	MODIFIER	NDNF-LOC100688998	483848-100688998	intergenic_region	483848-100688998		-1	n.19103993C>T
19	20091527	C	T	GATKstd	intron_variant	MODIFIER	LOC111091126	111091126	transcript	XR_002616228.1	pseudogene	3	n.366+10655C>T
19	20091527	C	T	GATKstd	intron_variant	MODIFIER	LOC111091126	111091126	transcript	XR_002616227.1	pseudogene	1	n.277+10655C>T
19	20711565	G	A	GATKstd	intron_variant	MODIFIER	ARHGEF4	483856	transcript	XM_540976.6	protein_coding	3	c.3015+37G>A
19	21761620	G	A	GATKstd	intergenic_region	MODIFIER	LOC100683469-LOC111091130	100683469-111091130	intergenic_region	100683469-111091130		-1	n.21761620G>A
19	21878477	G	A	PASS	intergenic_region	MODIFIER	LOC100683469-LOC111091130	100683469-111091130	intergenic_region	100683469-111091130		-1	n.21878477G>A
19	23714118	C	T	PASS	intron_variant	MODIFIER	LOC111091054	111091054	transcript	XR_002616099.1	pseudogene	2	n.283+11147C>T
19	23740633	C	T	PASS	intergenic_region	MODIFIER	LOC111091054-476107	111091054-476107	intergenic_region	111091054-476107		-1	n.23740633C>T
19	24003144	T	C	GATKstd	intergenic_region	MODIFIER	GYPC-LOC100683571	609898-100683571	intergenic_region	609898-100683571		-1	n.24003144T>C
19	27589944	A	T	GATKstd	intergenic_region	MODIFIER	LOC111091138-LOC111091057	111091138-111091057	intergenic_region	111091138-111091057		-1	n.27589944A>T
19	27899982	C	CT	PASS	intergenic_region	MODIFIER	LOC100682780-LOC100856628	100682780-100856628	intergenic_region	100682780-100856628		-1	n.27899982_27899983insT
19	27967226	C	T	GATKstd	intergenic_region	MODIFIER	LOC100682780-LOC100856628	100682780-100856628	intergenic_region	100682780-100856628		-1	n.27967226C>T
19	29054459	G	GAAT	PASS	intergenic_region	MODIFIER	LOC111091143-GLI2	111091143-100682984	intergenic_region	111091143-100682984		-1	n.29054459_29054460insAAT
19	29054462	G	C	PASS	intergenic_region	MODIFIER	LOC111091143-GLI2	111091143-100682984	intergenic_region	111091143-100682984		-1	n.29054462G>C
19	29389907	CA	C	PASS	downstream_gene_variant	MODIFIER	LOC102156205	102156205	transcript	XR_001318297.2	pseudogene	-1	n.*3706delA
19	29389907	CA	C	PASS	intergenic_region	MODIFIER	LOC102156205-LOC111091144	102156205-111091144	intergenic_region	102156205-111091144		-1	n.29389908delA
19	29437728	G	C	PASS	intron_variant	MODIFIER	LOC111091144	111091144	transcript	XR_002616302.1	pseudogene	1	n.73-3151C>G
19	29499919	G	A	PASS	intergenic_region	MODIFIER	LOC102156322-LOC111091146	102156322-111091146	intergenic_region	102156322-111091146		-1	n.29499919G>A
19	30234854	A	T	PASS	intron_variant	MODIFIER	PTPN4	483882	transcript	XM_014121421.2	protein_coding	2	c.138+6056T>A
19	30234854	A	T	PASS	intron_variant	MODIFIER	PTPN4	483882	transcript	XM_022406054.1	protein_coding	1	c.-89+6056T>A
19	30234854	A	T	PASS	intron_variant	MODIFIER	PTPN4	483882	transcript	XM_022406053.1	protein_coding	1	c.138+6056T>A
19	30234854	A	T	PASS	intron_variant	MODIFIER	PTPN4	483882	transcript	XM_022406049.1	protein_coding	3	c.138+6056T>A
19	30234854	A	T	PASS	intron_variant	MODIFIER	PTPN4	483882	transcript	XM_014121422.2	protein_coding	2	c.138+6056T>A
19	30234854	A	T	PASS	intron_variant	MODIFIER	PTPN4	483882	transcript	XM_014121423.2	protein_coding	2	c.138+6056T>A
19	30234854	A	T	PASS	intron_variant	MODIFIER	PTPN4	483882	transcript	XM_014121424.2	protein_coding	2	c.138+6056T>A
19	30234854	A	T	PASS	intron_variant	MODIFIER	PTPN4	483882	transcript	XM_014121425.2	protein_coding	2	c.138+6056T>A
19	30234854	A	T	PASS	intron_variant	MODIFIER	PTPN4	483882	transcript	XM_022406050.1	protein_coding	2	c.138+6056T>A
19	30234854	A	T	PASS	intron_variant	MODIFIER	PTPN4	483882	transcript	XM_022406051.1	protein_coding	2	c.138+6056T>A
19	30234854	A	T	PASS	intron_variant	MODIFIER	PTPN4	483882	transcript	XM_022406052.1	protein_coding	2	c.138+6056T>A
19	30310684	C	CCATAATGTGAGAGCATAATGTGAGAG	PASS	intergenic_region	MODIFIER	PTPN4-CFAP221	483882-476113	intergenic_region	483882-476113		-1	n.30310684_30310685insCATAATGTGAGAGCATAATGTGAGAG
19	30435138	G	A	PASS	missense_variant	MODERATE	CFAP221	476113	transcript	XM_022406055.1	protein_coding	14	c.1352C>T	p.Thr451Met
19	30435138	G	A	PASS	missense_variant	MODERATE	CFAP221	476113	transcript	XM_022406056.1	protein_coding	14	c.1352C>T	p.Thr451Met
19	30435138	G	A	PASS	missense_variant	MODERATE	CFAP221	476113	transcript	XM_022406057.1	protein_coding	14	c.1352C>T	p.Thr451Met
19	30435138	G	A	PASS	missense_variant	MODERATE	CFAP221	476113	transcript	XM_022406059.1	protein_coding	14	c.1352C>T	p.Thr451Met
19	30435138	G	A	PASS	missense_variant	MODERATE	CFAP221	476113	transcript	XM_022406058.1	protein_coding	14	c.1352C>T	p.Thr451Met
19	30435138	G	A	PASS	missense_variant	MODERATE	CFAP221	476113	transcript	XM_022406060.1	protein_coding	14	c.1352C>T	p.Thr451Met
19	30435138	G	A	PASS	missense_variant	MODERATE	CFAP221	476113	transcript	XM_022406061.1	protein_coding	13	c.1271C>T	p.Thr424Met
19	30435138	G	A	PASS	missense_variant	MODERATE	CFAP221	476113	transcript	XM_005631909.2	protein_coding	13	c.1271C>T	p.Thr424Met
19	30435138	G	A	PASS	missense_variant	MODERATE	CFAP221	476113	transcript	XM_005631908.1	protein_coding	14	c.1352C>T	p.Thr451Met
19	30435138	G	A	PASS	non_coding_transcript_exon_variant	MODIFIER	CFAP221	476113	transcript	XR_002616319.1	pseudogene	6	n.614C>T
19	30435138	G	A	PASS	non_coding_transcript_exon_variant	MODIFIER	CFAP221	476113	transcript	XR_002616317.1	pseudogene	7	n.722C>T
19	30435138	G	A	PASS	non_coding_transcript_exon_variant	MODIFIER	CFAP221	476113	transcript	XR_002616316.1	pseudogene	8	n.781C>T
19	30435138	G	A	PASS	non_coding_transcript_exon_variant	MODIFIER	CFAP221	476113	transcript	XR_002616318.1	pseudogene	6	n.584C>T
19	30435138	G	A	PASS	non_coding_transcript_exon_variant	MODIFIER	CFAP221	476113	transcript	XR_002616312.1	pseudogene	12	n.1105C>T
19	30435138	G	A	PASS	non_coding_transcript_exon_variant	MODIFIER	CFAP221	476113	transcript	XR_002616313.1	pseudogene	12	n.1125C>T
19	30435138	G	A	PASS	non_coding_transcript_exon_variant	MODIFIER	CFAP221	476113	transcript	XR_002616314.1	pseudogene	13	n.1268C>T
19	30435138	G	A	PASS	non_coding_transcript_exon_variant	MODIFIER	CFAP221	476113	transcript	XR_002616315.1	pseudogene	12	n.1121C>T
19	30560967	C	T	PASS	intron_variant	MODIFIER	SCTR	483883	transcript	XM_022406065.1	protein_coding	8	c.928+2194C>T
19	30650936	T	C	PASS	intron_variant	MODIFIER	C19H2orf76	476116	transcript	XM_005631911.3	protein_coding	1	c.-227+5042T>C
19	30650936	T	C	PASS	intron_variant	MODIFIER	C19H2orf76	476116	transcript	XM_533323.6	protein_coding	1	c.-130+5042T>C
19	30662056	G	A	GATKstd	intron_variant	MODIFIER	C19H2orf76	476116	transcript	XM_005631911.3	protein_coding	2	c.-130+3559G>A
19	30662056	G	A	GATKstd	intron_variant	MODIFIER	C19H2orf76	476116	transcript	XM_533323.6	protein_coding	1	c.-129-8874G>A
19	30877168	C	T	PASS	intergenic_region	MODIFIER	C1QL2-LOC111091059	483886-111091059	intergenic_region	483886-111091059		-1	n.30877168C>T
19	30900797	C	T	PASS	upstream_gene_variant	MODIFIER	LOC111091059	111091059	transcript	XR_002616103.1	pseudogene	-1	n.-190C>T
19	30900797	C	T	PASS	intergenic_region	MODIFIER	C1QL2-LOC111091059	483886-111091059	intergenic_region	483886-111091059		-1	n.30900797C>T
19	31174646	C	T	PASS	intron_variant	MODIFIER	LOC111091155	111091155	transcript	XR_002616325.1	pseudogene	1	n.288+31977C>T
19	31719245	G	T	PASS	intron_variant	MODIFIER	LOC102151514	102151514	transcript	XR_001318287.2	pseudogene	3	n.389-259C>A
19	32459463	G	A	PASS	intergenic_region	MODIFIER	LOC102152166-LOC106560027	102152166-106560027	intergenic_region	102152166-106560027		-1	n.32459463G>A
19	32714174	T	C	GATKstd	intergenic_region	MODIFIER	LOC102152166-LOC106560027	102152166-106560027	intergenic_region	102152166-106560027		-1	n.32714174T>C
19	32863614	A	G	PASS	intergenic_region	MODIFIER	LOC102152166-LOC106560027	102152166-106560027	intergenic_region	102152166-106560027		-1	n.32863614A>G
19	33040352	ACAAT	A	PASS	intergenic_region	MODIFIER	LOC102152166-LOC106560027	102152166-106560027	intergenic_region	102152166-106560027		-1	n.33040353_33040356delCAAT
19	33224462	C	T	PASS	intron_variant	MODIFIER	LOC106560027	106560027	transcript	XR_001318262.2	pseudogene	2	n.183-878G>A
19	33224462	C	T	PASS	intron_variant	MODIFIER	LOC106560027	106560027	transcript	XR_001318263.2	pseudogene	2	n.183-878G>A
19	33224462	C	T	PASS	intron_variant	MODIFIER	LOC106560027	106560027	transcript	XR_002616345.1	pseudogene	2	n.183-878G>A
19	33224462	C	T	PASS	intron_variant	MODIFIER	LOC106560027	106560027	transcript	XR_002616346.1	pseudogene	2	n.183-878G>A
19	33224462	C	T	PASS	intron_variant	MODIFIER	LOC106560027	106560027	transcript	XR_002616347.1	pseudogene	2	n.183-878G>A
19	33224462	C	T	PASS	intron_variant	MODIFIER	LOC106560027	106560027	transcript	XR_002616352.1	pseudogene	2	n.183-878G>A
19	33224462	C	T	PASS	intron_variant	MODIFIER	LOC106560027	106560027	transcript	XR_002616353.1	pseudogene	2	n.183-878G>A
19	33224462	C	T	PASS	intron_variant	MODIFIER	LOC106560027	106560027	transcript	XR_002616354.1	pseudogene	2	n.183-878G>A
19	33224462	C	T	PASS	intron_variant	MODIFIER	LOC106560027	106560027	transcript	XR_002616355.1	pseudogene	2	n.183-878G>A
19	33224462	C	T	PASS	intron_variant	MODIFIER	LOC106560027	106560027	transcript	XR_002616348.1	pseudogene	2	n.183-878G>A
19	33224462	C	T	PASS	intron_variant	MODIFIER	LOC106560027	106560027	transcript	XR_002616349.1	pseudogene	2	n.183-878G>A
19	33224462	C	T	PASS	intron_variant	MODIFIER	LOC106560027	106560027	transcript	XR_002616350.1	pseudogene	2	n.183-878G>A
19	33224462	C	T	PASS	intron_variant	MODIFIER	LOC106560027	106560027	transcript	XR_002616351.1	pseudogene	2	n.183-878G>A
19	35099937	A	T	GATKstd	intron_variant	MODIFIER	ACTR3	403702	transcript	XM_848216.5	protein_coding	10	c.1008+534T>A
19	35099938	A	T	GATKstd	intron_variant	MODIFIER	ACTR3	403702	transcript	XM_848216.5	protein_coding	10	c.1008+533T>A
19	35167444	G	A	PASS	downstream_gene_variant	MODIFIER	LOC111091163	111091163	transcript	XR_002616397.1	pseudogene	-1	n.*2557C>T
19	35167444	G	A	PASS	non_coding_transcript_exon_variant	MODIFIER	LOC111091163	111091163	transcript	XR_002616396.1	pseudogene	4	n.2970C>T
19	35743021	C	T	PASS	intron_variant	MODIFIER	NCKAP5	483893	transcript	XM_022406092.1	protein_coding	12	c.1099-1974G>A
19	35743021	C	T	PASS	intron_variant	MODIFIER	NCKAP5	483893	transcript	XM_022406097.1	protein_coding	11	c.1033-1974G>A
19	35743021	C	T	PASS	intron_variant	MODIFIER	NCKAP5	483893	transcript	XM_014121411.2	protein_coding	10	c.895-1974G>A
19	35743021	C	T	PASS	intron_variant	MODIFIER	NCKAP5	483893	transcript	XM_022406098.1	protein_coding	12	c.985-1974G>A
19	35743021	C	T	PASS	intron_variant	MODIFIER	NCKAP5	483893	transcript	XM_022406094.1	protein_coding	12	c.1066-1974G>A
19	35743021	C	T	PASS	intron_variant	MODIFIER	NCKAP5	483893	transcript	XM_022406096.1	protein_coding	12	c.1045-1974G>A
19	35743021	C	T	PASS	intron_variant	MODIFIER	NCKAP5	483893	transcript	XM_022406095.1	protein_coding	13	c.1045-1974G>A
19	35743021	C	T	PASS	intron_variant	MODIFIER	NCKAP5	483893	transcript	XM_022406093.1	protein_coding	12	c.1099-1974G>A
19	35743021	C	T	PASS	intron_variant	MODIFIER	NCKAP5	483893	transcript	XM_005631921.3	protein_coding	12	c.1099-1974G>A
19	35789064	C	G	GATKstd	intron_variant	MODIFIER	NCKAP5	483893	transcript	XM_022406092.1	protein_coding	10	c.807+25684G>C
19	35789064	C	G	GATKstd	intron_variant	MODIFIER	NCKAP5	483893	transcript	XM_022406097.1	protein_coding	9	c.741+25684G>C
19	35789064	C	G	GATKstd	intron_variant	MODIFIER	NCKAP5	483893	transcript	XM_014121411.2	protein_coding	8	c.603+25684G>C
19	35789064	C	G	GATKstd	intron_variant	MODIFIER	NCKAP5	483893	transcript	XM_022406098.1	protein_coding	10	c.693+25684G>C
19	35789064	C	G	GATKstd	intron_variant	MODIFIER	NCKAP5	483893	transcript	XM_022406094.1	protein_coding	10	c.774+25684G>C
19	35789064	C	G	GATKstd	intron_variant	MODIFIER	NCKAP5	483893	transcript	XM_022406096.1	protein_coding	10	c.753+25684G>C
19	35789064	C	G	GATKstd	intron_variant	MODIFIER	NCKAP5	483893	transcript	XM_022406095.1	protein_coding	11	c.753+25684G>C
19	35789064	C	G	GATKstd	intron_variant	MODIFIER	NCKAP5	483893	transcript	XM_022406093.1	protein_coding	10	c.807+25684G>C
19	35789064	C	G	GATKstd	intron_variant	MODIFIER	NCKAP5	483893	transcript	XM_005631921.3	protein_coding	10	c.807+25684G>C
19	39883551	T	TTTTGCCTTTTTTTTTTTTTTTTTTTTTTTTTTTTTTTTTTTTTTTTTTTTTTC	PASS	intron_variant	MODIFIER	THSD7B	100684750	transcript	XM_014121529.2	protein_coding	6	c.1720+38199_1720+38200insTTTGCCTTTTTTTTTTTTTTTTTTTTTTTTTTTTTTTTTTTTTTTTTTTTTTC
19	50029895	G	GA	PASS	intron_variant	MODIFIER	MBD5	483910	transcript	XM_022406165.1	protein_coding	3	c.-1199+8242_-1199+8243insA
19	50029895	G	GA	PASS	intron_variant	MODIFIER	MBD5	483910	transcript	XM_005631969.3	protein_coding	3	c.-1199+8242_-1199+8243insA
19	50029895	G	GA	PASS	intron_variant	MODIFIER	MBD5	483910	transcript	XM_022406152.1	protein_coding	3	c.-1199+8242_-1199+8243insA
19	50029895	G	GA	PASS	intron_variant	MODIFIER	MBD5	483910	transcript	XM_022406153.1	protein_coding	3	c.-1074+8242_-1074+8243insA
19	50029895	G	GA	PASS	intron_variant	MODIFIER	MBD5	483910	transcript	XM_022406155.1	protein_coding	3	c.-1145+8242_-1145+8243insA
19	50029895	G	GA	PASS	intron_variant	MODIFIER	MBD5	483910	transcript	XM_022406156.1	protein_coding	3	c.-1100+8242_-1100+8243insA
19	50029895	G	GA	PASS	intron_variant	MODIFIER	MBD5	483910	transcript	XM_022406157.1	protein_coding	3	c.-957+8242_-957+8243insA
19	50029895	G	GA	PASS	intron_variant	MODIFIER	MBD5	483910	transcript	XM_022406158.1	protein_coding	3	c.-858+8242_-858+8243insA
19	50029895	G	GA	PASS	intron_variant	MODIFIER	MBD5	483910	transcript	XM_022406159.1	protein_coding	3	c.-903+8242_-903+8243insA
19	50029895	G	GA	PASS	intron_variant	MODIFIER	MBD5	483910	transcript	XM_022406160.1	protein_coding	3	c.-971+8242_-971+8243insA
19	50029895	G	GA	PASS	intron_variant	MODIFIER	MBD5	483910	transcript	XM_022406161.1	protein_coding	3	c.-736+8242_-736+8243insA
19	50029895	G	GA	PASS	intron_variant	MODIFIER	MBD5	483910	transcript	XM_022406162.1	protein_coding	3	c.-729+8242_-729+8243insA
19	50029895	G	GA	PASS	intron_variant	MODIFIER	MBD5	483910	transcript	XM_022406163.1	protein_coding	3	c.-684+8242_-684+8243insA
19	50029895	G	GA	PASS	intron_variant	MODIFIER	MBD5	483910	transcript	XM_022406166.1	protein_coding	3	c.-1199+8242_-1199+8243insA
19	50029895	G	GA	PASS	intron_variant	MODIFIER	MBD5	483910	transcript	XM_022406167.1	protein_coding	3	c.-1199+8242_-1199+8243insA
19	50029895	G	GA	PASS	intron_variant	MODIFIER	MBD5	483910	transcript	XM_022406168.1	protein_coding	3	c.-1199+8242_-1199+8243insA
1	30016268	T	TA	PASS	intergenic_region	MODIFIER	LOC100685756-TNFAIP3	100685756-484006	intergenic_region	100685756-484006		-1	n.30016268_30016269insA
1	43594279	G	GAAAAAAAAAAAAAAAAAAAAA	PASS	intergenic_region	MODIFIER	LOC111090676-OPRM1	111090676-484041	intergenic_region	111090676-484041		-1	n.43594279_43594280insAAAAAAAAAAAAAAAAAAAAA
1	45396856	A	ACCAGCC	PASS	intergenic_region	MODIFIER	LOC102153338-LOC111090678	102153338-111090678	intergenic_region	102153338-111090678		-1	n.45396856_45396857insCCAGCC
1	45396857	T	TTGTGTCC	PASS	intergenic_region	MODIFIER	LOC102153338-LOC111090678	102153338-111090678	intergenic_region	102153338-111090678		-1	n.45396857_45396858insTGTGTCC
1	45396858	A	C	GATKstd	intergenic_region	MODIFIER	LOC102153338-LOC111090678	102153338-111090678	intergenic_region	102153338-111090678		-1	n.45396858A>C
1	63857618	A	C	GATKstd	downstream_gene_variant	MODIFIER	NKAIN2	100688012	transcript	XM_014113513.2	protein_coding	-1	c.*5523A>C
1	63857618	A	C	GATKstd	downstream_gene_variant	MODIFIER	NKAIN2	100688012	transcript	XM_022419659.1	protein_coding	-1	c.*1926A>C
1	63857618	A	C	GATKstd	intergenic_region	MODIFIER	NKAIN2-RNF217	100688012-484112	intergenic_region	100688012-484112		-1	n.63857618A>C
1	63926010	T	A	GATKstd	intron_variant	MODIFIER	RNF217	484112	transcript	XM_014116719.2	protein_coding	1	c.106+22920T>A
1	63936463	G	T	GATKstd	intron_variant	MODIFIER	RNF217	484112	transcript	XM_014116719.2	protein_coding	1	c.106+33373G>T
1	64010796	AT	A	PASS	intron_variant	MODIFIER	RNF217	484112	transcript	XM_014116719.2	protein_coding	1	c.107-30283delT
1	64010799	T	A	PASS	intron_variant	MODIFIER	RNF217	484112	transcript	XM_014116719.2	protein_coding	1	c.107-30281T>A
1	64076745	GC	G	PASS	intron_variant	MODIFIER	RNF217	484112	transcript	XM_014116719.2	protein_coding	4	c.631-115delC
1	64611340	T	A	GATKstd	downstream_gene_variant	MODIFIER	LOC100684322	100684322	transcript	100684322	pseudogene	-1	n.*4373T>A
1	64611340	T	A	GATKstd	intergenic_region	MODIFIER	LOC100684322-LOC100688798	100684322-100688798	intergenic_region	100684322-100688798		-1	n.64611340T>A
1	64611342	C	A	GATKstd	downstream_gene_variant	MODIFIER	LOC100684322	100684322	transcript	100684322	pseudogene	-1	n.*4375C>A
1	64611342	C	A	GATKstd	intergenic_region	MODIFIER	LOC100684322-LOC100688798	100684322-100688798	intergenic_region	100684322-100688798		-1	n.64611342C>A
1	64884445	C	T	GATKstd	intron_variant	MODIFIER	TRMT11	476285	transcript	XM_533490.6	protein_coding	8	c.760+294C>T
1	64884445	C	T	GATKstd	intron_variant	MODIFIER	TRMT11	476285	transcript	XM_022419758.1	protein_coding	8	c.571+294C>T
1	64884445	C	T	GATKstd	intron_variant	MODIFIER	TRMT11	476285	transcript	XM_022419748.1	protein_coding	7	c.571+294C>T
1	64884445	C	T	GATKstd	intron_variant	MODIFIER	TRMT11	476285	transcript	XM_022419756.1	protein_coding	7	c.571+294C>T
1	64884445	C	T	GATKstd	intron_variant	MODIFIER	TRMT11	476285	transcript	XM_022419741.1	protein_coding	8	c.559+294C>T
1	64884445	C	T	GATKstd	intron_variant	MODIFIER	TRMT11	476285	transcript	XM_022419761.1	protein_coding	4	c.166+294C>T
1	65530560	G	A	GATKstd	intergenic_region	MODIFIER	LOC111090705-LOC100684456	111090705-100684456	intergenic_region	111090705-100684456		-1	n.65530560G>A
1	65633200	G	A	GATKstd	intergenic_region	MODIFIER	LOC100684456-LOC102153070	100684456-102153070	intergenic_region	100684456-102153070		-1	n.65633200G>A
1	65688681	C	A	GATKstd	downstream_gene_variant	MODIFIER	LOC102153070	102153070	transcript	XR_002627442.1	pseudogene	-1	n.*354G>T
1	65688681	C	A	GATKstd	intron_variant	MODIFIER	LOC102153070	102153070	transcript	XR_002627437.1	pseudogene	13	n.1848+4393G>T
1	65688681	C	A	GATKstd	intron_variant	MODIFIER	LOC102153070	102153070	transcript	XR_002627441.1	pseudogene	13	n.1849-4092G>T
1	65789271	A	G	GATKstd	intron_variant	MODIFIER	LOC102153070	102153070	transcript	XR_002627450.1	pseudogene	5	n.1984+5881T>C
1	65789271	A	G	GATKstd	intron_variant	MODIFIER	LOC102153070	102153070	transcript	XR_002627437.1	pseudogene	4	n.329+11830T>C
1	65789271	A	G	GATKstd	intron_variant	MODIFIER	LOC102153070	102153070	transcript	XR_002627441.1	pseudogene	4	n.329+11830T>C
1	65789271	A	G	GATKstd	intron_variant	MODIFIER	LOC102153070	102153070	transcript	XR_002627442.1	pseudogene	4	n.329+11830T>C
1	65789271	A	G	GATKstd	intron_variant	MODIFIER	LOC102153070	102153070	transcript	XR_002627461.1	pseudogene	4	n.329+11830T>C
1	65789271	A	G	GATKstd	intron_variant	MODIFIER	LOC102153070	102153070	transcript	XR_002627443.1	pseudogene	4	n.329+11830T>C
1	65789271	A	G	GATKstd	intron_variant	MODIFIER	LOC102153070	102153070	transcript	XR_002627454.1	pseudogene	4	n.329+11830T>C
1	65789271	A	G	GATKstd	intron_variant	MODIFIER	LOC102153070	102153070	transcript	XR_002627451.1	pseudogene	3	n.364+5881T>C
1	65789271	A	G	GATKstd	intron_variant	MODIFIER	LOC102153070	102153070	transcript	XR_002627434.1	pseudogene	5	n.344+5881T>C
1	65789271	A	G	GATKstd	intron_variant	MODIFIER	LOC102153070	102153070	transcript	XR_002627430.1	pseudogene	4	n.256+5881T>C
1	65789271	A	G	GATKstd	intron_variant	MODIFIER	LOC102153070	102153070	transcript	XR_002627444.1	pseudogene	4	n.329+11830T>C
1	65789271	A	G	GATKstd	intron_variant	MODIFIER	LOC102153070	102153070	transcript	XR_002627447.1	pseudogene	4	n.329+11830T>C
1	65789271	A	G	GATKstd	intron_variant	MODIFIER	LOC102153070	102153070	transcript	XR_002627448.1	pseudogene	3	n.437+11830T>C
1	65789271	A	G	GATKstd	intron_variant	MODIFIER	LOC102153070	102153070	transcript	XR_002627429.1	pseudogene	3	n.206-14635T>C
1	65789271	A	G	GATKstd	intron_variant	MODIFIER	LOC102153070	102153070	transcript	XR_002627445.1	pseudogene	4	n.1968+11830T>C
1	65789271	A	G	GATKstd	intron_variant	MODIFIER	LOC102153070	102153070	transcript	XR_002627426.1	pseudogene	4	n.329+11830T>C
1	65789271	A	G	GATKstd	intron_variant	MODIFIER	LOC102153070	102153070	transcript	XR_002627427.1	pseudogene	4	n.329+11830T>C
1	65789271	A	G	GATKstd	intron_variant	MODIFIER	LOC102153070	102153070	transcript	XR_002627431.1	pseudogene	4	n.256+5881T>C
1	65789271	A	G	GATKstd	intron_variant	MODIFIER	LOC102153070	102153070	transcript	XR_002627433.1	pseudogene	3	n.205+52897T>C
1	65789271	A	G	GATKstd	intron_variant	MODIFIER	LOC102153070	102153070	transcript	XR_001316225.2	pseudogene	4	n.329+11830T>C
1	65789271	A	G	GATKstd	intron_variant	MODIFIER	LOC102153070	102153070	transcript	XR_002627446.1	pseudogene	4	n.329+11830T>C
1	65789271	A	G	GATKstd	intron_variant	MODIFIER	LOC102153070	102153070	transcript	XR_002627449.1	pseudogene	4	n.329+11830T>C
1	65789271	A	G	GATKstd	intron_variant	MODIFIER	LOC102153070	102153070	transcript	XR_001316226.2	pseudogene	4	n.329+11830T>C
1	66414582	G	T	PASS	intron_variant	MODIFIER	THEMIS	484120	transcript	XM_541237.5	protein_coding	4	c.1777-36560C>A
1	69503065	C	A	GATKstd	intron_variant	MODIFIER	LOC111096305	111096305	transcript	XR_002627607.1	pseudogene	4	n.1302-4114G>T
1	69503065	C	A	GATKstd	intron_variant	MODIFIER	LOC111096305	111096305	transcript	XR_002627608.1	pseudogene	5	n.1216-4114G>T
1	83826962	A	T	PASS	intergenic_region	MODIFIER	RORB-LOC100685845	484164-100685845	intergenic_region	484164-100685845		-1	n.83826962A>T
1	83826963	A	T	PASS	intergenic_region	MODIFIER	RORB-LOC100685845	484164-100685845	intergenic_region	484164-100685845		-1	n.83826963A>T
1	85717695	G	GA	PASS	intergenic_region	MODIFIER	C1H9orf57-C1H9orf85	102153343-608739	intergenic_region	102153343-608739		-1	n.85717695_85717696insA
1	88666653	A	AG	PASS	intron_variant	MODIFIER	LOC106559468	106559468	transcript	XR_002628661.1	pseudogene	1	n.367+666_367+667insG
1	111253515	G	A	GATKstd	intron_variant	MODIFIER	LOC100688264	100688264	transcript	100688264	pseudogene	1	n.645-3484G>A
1	111253521	A	G	GATKstd	intron_variant	MODIFIER	LOC100688264	100688264	transcript	100688264	pseudogene	1	n.645-3478A>G
1	111725734	AAG	A	PASS	intron_variant	MODIFIER	CEACAM23	100048998	transcript	NM_001097552.1	protein_coding	5	c.1172-439_1172-438delAG
1	121020154	G	GA	PASS	intron_variant	MODIFIER	ZNF536	484609	transcript	XM_022426442.1	protein_coding	4	c.3965-43974_3965-43973insT
1	121020154	G	GA	PASS	intron_variant	MODIFIER	ZNF536	484609	transcript	XM_022426464.1	protein_coding	3	c.3812-43974_3812-43973insT
1	121020154	G	GA	PASS	intron_variant	MODIFIER	ZNF536	484609	transcript	XM_022426460.1	protein_coding	4	c.3902-43974_3902-43973insT
1	121020154	G	GA	PASS	intron_variant	MODIFIER	ZNF536	484609	transcript	XM_005616788.3	protein_coding	5	c.3902-43974_3902-43973insT
1	121020154	G	GA	PASS	intron_variant	MODIFIER	ZNF536	484609	transcript	XM_005616784.3	protein_coding	5	c.3902-43974_3902-43973insT
1	121020154	G	GA	PASS	intron_variant	MODIFIER	ZNF536	484609	transcript	XM_022426450.1	protein_coding	6	c.3902-43974_3902-43973insT
1	121020154	G	GA	PASS	intron_variant	MODIFIER	ZNF536	484609	transcript	XM_005616786.3	protein_coding	5	c.3902-43974_3902-43973insT
1	121020154	G	GA	PASS	intron_variant	MODIFIER	ZNF536	484609	transcript	XM_005616785.3	protein_coding	5	c.3902-43974_3902-43973insT
1	121020154	G	GA	PASS	intron_variant	MODIFIER	ZNF536	484609	transcript	XM_005616787.3	protein_coding	5	c.3902-43974_3902-43973insT
1	121020154	G	GA	PASS	intron_variant	MODIFIER	ZNF536	484609	transcript	XM_022426473.1	protein_coding	5	c.*26+19392_*26+19393insT
1	121820122	A	C	GATKstd	upstream_gene_variant	MODIFIER	POP4	612732	transcript	XM_005616903.2	protein_coding	-1	c.-4311T>G
1	121820122	A	C	GATKstd	upstream_gene_variant	MODIFIER	LOC111090009	111090009	transcript	XR_002632297.1	pseudogene	-1	n.-3705A>C
1	121820122	A	C	GATKstd	upstream_gene_variant	MODIFIER	LOC111090009	111090009	transcript	XM_022426561.1	protein_coding	-1	c.-4074A>C
1	121820122	A	C	GATKstd	intergenic_region	MODIFIER	POP4-LOC111090009	612732-111090009	intergenic_region	612732-111090009		-1	n.121820122A>C
20	522743	C	T	GATKstd	missense_variant	MODERATE	KLF15	609067	transcript	XM_022406293.1	protein_coding	2	c.628G>A	p.Ala210Thr
20	522743	C	T	GATKstd	missense_variant	MODERATE	KLF15	609067	transcript	XM_022406294.1	protein_coding	1	c.628G>A	p.Ala210Thr
20	522743	C	T	GATKstd	missense_variant	MODERATE	KLF15	609067	transcript	XM_846268.4	protein_coding	2	c.628G>A	p.Ala210Thr
20	1089652	T	C	GATKstd	intron_variant	MODIFIER	CHCHD6	476509	transcript	XM_533716.6	protein_coding	6	c.581+14949T>C
20	1089652	T	C	GATKstd	intron_variant	MODIFIER	CHCHD6	476509	transcript	XR_002616521.1	pseudogene	7	n.866+14949T>C
20	1186682	G	A	GATKstd	downstream_gene_variant	MODIFIER	PLXNA1	100688869	transcript	XM_022406300.1	protein_coding	-1	c.*3361G>A
20	1186682	G	A	GATKstd	intergenic_region	MODIFIER	PLXNA1-LOC111091218	100688869-111091218	intergenic_region	100688869-111091218		-1	n.1186682G>A
20	1273246	T	A	GATKstd	intron_variant	MODIFIER	LOC111091218	111091218	transcript	XR_002616522.1	pseudogene	3	n.660+2825T>A
20	1613032	G	A	GATKstd	intergenic_region	MODIFIER	LOC111091221-LOC102154894	111091221-102154894	intergenic_region	111091221-102154894		-1	n.1613032G>A
20	1732427	G	A	GATKstd	intron_variant	MODIFIER	PODXL2	484623	transcript	XM_014121652.2	protein_coding	2	c.419-5509G>A
20	1732427	G	A	GATKstd	intron_variant	MODIFIER	PODXL2	484623	transcript	XR_002616544.1	pseudogene	2	n.430-5509G>A
20	3119111	A	T	GATKstd	intron_variant	MODIFIER	KIAA1257	100683130	transcript	XM_014121659.2	protein_coding	9	c.1332+3329A>T
20	3119111	A	T	GATKstd	intron_variant	MODIFIER	KIAA1257	100683130	transcript	XM_022406321.1	protein_coding	11	c.1332+3329A>T
20	3119111	A	T	GATKstd	intron_variant	MODIFIER	KIAA1257	100683130	transcript	XM_022406329.1	protein_coding	9	c.1148-7534A>T
20	3119111	A	T	GATKstd	intron_variant	MODIFIER	KIAA1257	100683130	transcript	XR_002616549.1	pseudogene	10	n.1774+3329A>T
20	3119111	A	T	GATKstd	intron_variant	MODIFIER	KIAA1257	100683130	transcript	XR_002616548.1	pseudogene	10	n.1773+3329A>T
20	3119111	A	T	GATKstd	intron_variant	MODIFIER	KIAA1257	100683130	transcript	XR_002616547.1	pseudogene	10	n.1771+3329A>T
20	3119111	A	T	GATKstd	intron_variant	MODIFIER	KIAA1257	100683130	transcript	XM_014121662.2	protein_coding	10	c.1332+3329A>T
20	3119111	A	T	GATKstd	intron_variant	MODIFIER	KIAA1257	100683130	transcript	XM_022406327.1	protein_coding	10	c.1332+3329A>T
20	3119111	A	T	GATKstd	intron_variant	MODIFIER	KIAA1257	100683130	transcript	XM_014121660.2	protein_coding	10	c.1329+3329A>T
20	3119111	A	T	GATKstd	intron_variant	MODIFIER	KIAA1257	100683130	transcript	XM_022406323.1	protein_coding	10	c.1317+3329A>T
20	3119111	A	T	GATKstd	intron_variant	MODIFIER	KIAA1257	100683130	transcript	XM_014121665.2	protein_coding	7	c.987+3329A>T
20	3119111	A	T	GATKstd	intron_variant	MODIFIER	KIAA1257	100683130	transcript	XM_022406320.1	protein_coding	10	c.1332+3329A>T
20	3119111	A	T	GATKstd	intron_variant	MODIFIER	KIAA1257	100683130	transcript	XM_014121663.2	protein_coding	8	c.1119+3329A>T
20	3119111	A	T	GATKstd	intron_variant	MODIFIER	KIAA1257	100683130	transcript	XM_022406326.1	protein_coding	7	c.975+3329A>T
20	3119111	A	T	GATKstd	intron_variant	MODIFIER	KIAA1257	100683130	transcript	XM_014121661.2	protein_coding	10	c.1332+3329A>T
20	3119111	A	T	GATKstd	intron_variant	MODIFIER	KIAA1257	100683130	transcript	XM_022406324.1	protein_coding	10	c.1332+3329A>T
20	3119111	A	T	GATKstd	intron_variant	MODIFIER	KIAA1257	100683130	transcript	XM_014121664.2	protein_coding	10	c.1332+3329A>T
20	3119111	A	T	GATKstd	intron_variant	MODIFIER	KIAA1257	100683130	transcript	XM_005632088.3	protein_coding	10	c.1332+3329A>T
20	3119111	A	T	GATKstd	intron_variant	MODIFIER	KIAA1257	100683130	transcript	XM_022406328.1	protein_coding	10	c.1332+3329A>T
20	3119111	A	T	GATKstd	intron_variant	MODIFIER	KIAA1257	100683130	transcript	XM_022406322.1	protein_coding	9	c.1332+3329A>T
20	3371390	C	T	GATKstd	intron_variant	MODIFIER	IQSEC1	100683208	transcript	XM_022406331.1	protein_coding	1	c.77+4073G>A
20	3371390	C	T	GATKstd	intron_variant	MODIFIER	IQSEC1	100683208	transcript	XM_022406333.1	protein_coding	1	c.23+31800G>A
20	3399287	G	A	GATKstd	intron_variant	MODIFIER	IQSEC1	100683208	transcript	XM_022406333.1	protein_coding	1	c.23+3903C>T
20	3526411	C	T	GATKstd	intergenic_region	MODIFIER	IQSEC1-LOC111091225	100683208-111091225	intergenic_region	100683208-111091225		-1	n.3526411C>T
20	4101167	T	A	GATKstd	intron_variant	MODIFIER	WNT7A	607180	transcript	XM_844117.5	protein_coding	3	c.570+13222A>T
20	4114147	C	A	GATKstd	intron_variant	MODIFIER	WNT7A	607180	transcript	XM_844117.5	protein_coding	3	c.570+242G>T
20	6719251	T	C	GATKstd	intergenic_region	MODIFIER	TAMM41-VGLL4	476532-607588	intergenic_region	476532-607588		-1	n.6719251T>C
20	23095800	C	T	GATKstd	intergenic_region	MODIFIER	FAM19A4-FAM19A1	610997-611001	intergenic_region	610997-611001		-1	n.23095800C>T
20	31827606	TAATGGG	T	PASS	intron_variant	MODIFIER	C20H3orf67	476572	transcript	XM_022406493.1	protein_coding	7	c.176-5539_176-5534delAATGGG
20	31827606	TAATGGG	T	PASS	intron_variant	MODIFIER	C20H3orf67	476572	transcript	XM_022406506.1	protein_coding	7	c.176-5539_176-5534delAATGGG
20	31827606	TAATGGG	T	PASS	intron_variant	MODIFIER	C20H3orf67	476572	transcript	XM_022406504.1	protein_coding	7	c.176-5539_176-5534delAATGGG
20	31827606	TAATGGG	T	PASS	intron_variant	MODIFIER	C20H3orf67	476572	transcript	XM_022406505.1	protein_coding	7	c.176-5539_176-5534delAATGGG
20	31827606	TAATGGG	T	PASS	intron_variant	MODIFIER	C20H3orf67	476572	transcript	XM_022406495.1	protein_coding	7	c.176-5539_176-5534delAATGGG
20	31827606	TAATGGG	T	PASS	intron_variant	MODIFIER	C20H3orf67	476572	transcript	XM_022406498.1	protein_coding	7	c.176-5539_176-5534delAATGGG
20	31827606	TAATGGG	T	PASS	intron_variant	MODIFIER	C20H3orf67	476572	transcript	XM_022406502.1	protein_coding	7	c.176-5539_176-5534delAATGGG
20	31827606	TAATGGG	T	PASS	intron_variant	MODIFIER	C20H3orf67	476572	transcript	XM_022406496.1	protein_coding	6	c.176-5539_176-5534delAATGGG
20	31827606	TAATGGG	T	PASS	intron_variant	MODIFIER	C20H3orf67	476572	transcript	XM_022406497.1	protein_coding	7	c.176-5539_176-5534delAATGGG
20	31827606	TAATGGG	T	PASS	intron_variant	MODIFIER	C20H3orf67	476572	transcript	XR_002616743.1	pseudogene	7	n.941-5539_941-5534delAATGGG
20	31827606	TAATGGG	T	PASS	intron_variant	MODIFIER	C20H3orf67	476572	transcript	XM_014122160.2	protein_coding	7	c.176-5539_176-5534delAATGGG
20	31827606	TAATGGG	T	PASS	intron_variant	MODIFIER	C20H3orf67	476572	transcript	XM_022406507.1	protein_coding	7	c.176-5539_176-5534delAATGGG
20	31827606	TAATGGG	T	PASS	intron_variant	MODIFIER	C20H3orf67	476572	transcript	XM_022406501.1	protein_coding	6	c.176-5539_176-5534delAATGGG
20	31827606	TAATGGG	T	PASS	intron_variant	MODIFIER	C20H3orf67	476572	transcript	XM_022406503.1	protein_coding	6	c.176-5539_176-5534delAATGGG
20	31827606	TAATGGG	T	PASS	intron_variant	MODIFIER	C20H3orf67	476572	transcript	XM_022406494.1	protein_coding	3	c.176-5539_176-5534delAATGGG
20	31827606	TAATGGG	T	PASS	intron_variant	MODIFIER	C20H3orf67	476572	transcript	XM_022406500.1	protein_coding	3	c.176-5539_176-5534delAATGGG
20	32274704	T	G	GATKstd	upstream_gene_variant	MODIFIER	PXK	476575	transcript	XM_022406523.1	protein_coding	-1	c.-2029A>C
20	32274704	T	G	GATKstd	upstream_gene_variant	MODIFIER	PXK	476575	transcript	XR_002616752.1	pseudogene	-1	n.-1937A>C
20	32274704	T	G	GATKstd	upstream_gene_variant	MODIFIER	PXK	476575	transcript	XR_002616753.1	pseudogene	-1	n.-1937A>C
20	32274704	T	G	GATKstd	upstream_gene_variant	MODIFIER	PXK	476575	transcript	XR_002616754.1	pseudogene	-1	n.-1937A>C
20	32274704	T	G	GATKstd	upstream_gene_variant	MODIFIER	PXK	476575	transcript	XR_002616755.1	pseudogene	-1	n.-1937A>C
20	32274704	T	G	GATKstd	upstream_gene_variant	MODIFIER	PXK	476575	transcript	XR_002616756.1	pseudogene	-1	n.-1937A>C
20	32274704	T	G	GATKstd	upstream_gene_variant	MODIFIER	PXK	476575	transcript	XR_002616757.1	pseudogene	-1	n.-1937A>C
20	32274704	T	G	GATKstd	upstream_gene_variant	MODIFIER	PXK	476575	transcript	XM_022406517.1	protein_coding	-1	c.-2029A>C
20	32274704	T	G	GATKstd	upstream_gene_variant	MODIFIER	PXK	476575	transcript	XM_022406518.1	protein_coding	-1	c.-2029A>C
20	32274704	T	G	GATKstd	upstream_gene_variant	MODIFIER	PXK	476575	transcript	XM_014121920.1	protein_coding	-1	c.-46882A>C
20	32274704	T	G	GATKstd	upstream_gene_variant	MODIFIER	PXK	476575	transcript	XM_014121904.1	protein_coding	-1	c.-2029A>C
20	32274704	T	G	GATKstd	upstream_gene_variant	MODIFIER	PXK	476575	transcript	XM_022406514.1	protein_coding	-1	c.-2029A>C
20	32274704	T	G	GATKstd	upstream_gene_variant	MODIFIER	PXK	476575	transcript	XM_003432889.2	protein_coding	-1	c.-2029A>C
20	32274704	T	G	GATKstd	upstream_gene_variant	MODIFIER	PXK	476575	transcript	XM_005632377.1	protein_coding	-1	c.-2029A>C
20	32274704	T	G	GATKstd	upstream_gene_variant	MODIFIER	PXK	476575	transcript	XM_022406524.1	protein_coding	-1	c.-2029A>C
20	32274704	T	G	GATKstd	upstream_gene_variant	MODIFIER	PXK	476575	transcript	XM_014121908.2	protein_coding	-1	c.-2029A>C
20	32274704	T	G	GATKstd	upstream_gene_variant	MODIFIER	PXK	476575	transcript	XM_014121914.2	protein_coding	-1	c.-2029A>C
20	32274704	T	G	GATKstd	upstream_gene_variant	MODIFIER	PXK	476575	transcript	XM_022406520.1	protein_coding	-1	c.-2029A>C
20	32274704	T	G	GATKstd	upstream_gene_variant	MODIFIER	PXK	476575	transcript	XM_022406521.1	protein_coding	-1	c.-2029A>C
20	32274704	T	G	GATKstd	upstream_gene_variant	MODIFIER	PXK	476575	transcript	XM_022406522.1	protein_coding	-1	c.-2029A>C
20	32274704	T	G	GATKstd	upstream_gene_variant	MODIFIER	PXK	476575	transcript	XM_014121905.2	protein_coding	-1	c.-2029A>C
20	32274704	T	G	GATKstd	upstream_gene_variant	MODIFIER	PXK	476575	transcript	XM_014121911.2	protein_coding	-1	c.-2029A>C
20	32274704	T	G	GATKstd	upstream_gene_variant	MODIFIER	PXK	476575	transcript	XM_014121917.2	protein_coding	-1	c.-2029A>C
20	32274704	T	G	GATKstd	upstream_gene_variant	MODIFIER	PXK	476575	transcript	XM_014121918.2	protein_coding	-1	c.-2029A>C
20	32274704	T	G	GATKstd	upstream_gene_variant	MODIFIER	PXK	476575	transcript	XM_022406516.1	protein_coding	-1	c.-2029A>C
20	32274704	T	G	GATKstd	upstream_gene_variant	MODIFIER	PXK	476575	transcript	XM_022406515.1	protein_coding	-1	c.-2029A>C
20	32274704	T	G	GATKstd	intergenic_region	MODIFIER	PXK-LOC111091303	476575-111091303	intergenic_region	476575-111091303		-1	n.32274704T>G
20	33310497	C	T	GATKstd	downstream_gene_variant	MODIFIER	IL17RD	484719	transcript	XM_541835.6	protein_coding	-1	c.*7093C>T
20	33310497	C	T	GATKstd	intergenic_region	MODIFIER	IL17RD-ARHGEF3	484719-476579	intergenic_region	484719-476579		-1	n.33310497C>T
20	33388022	A	C	GATKstd	intron_variant	MODIFIER	ARHGEF3	476579	transcript	XM_005632412.3	protein_coding	2	c.45-26934A>C
20	33388022	A	C	GATKstd	intron_variant	MODIFIER	ARHGEF3	476579	transcript	XM_022406566.1	protein_coding	3	c.45-26934A>C
20	33489260	C	A	GATKstd	intron_variant	MODIFIER	ARHGEF3	476579	transcript	XM_005632412.3	protein_coding	4	c.174+9357C>A
20	33489260	C	A	GATKstd	intron_variant	MODIFIER	ARHGEF3	476579	transcript	XM_022406566.1	protein_coding	5	c.174+9357C>A
20	33489260	C	A	GATKstd	intron_variant	MODIFIER	ARHGEF3	476579	transcript	XM_014122107.2	protein_coding	2	c.114+9357C>A
20	33974695	C	T	GATKstd	intron_variant	MODIFIER	ERC2	484720	transcript	XM_022406567.1	protein_coding	3	c.658-34951C>T
20	33974695	C	T	GATKstd	intron_variant	MODIFIER	ERC2	484720	transcript	XM_022406580.1	protein_coding	3	c.658-34951C>T
20	33974695	C	T	GATKstd	intron_variant	MODIFIER	ERC2	484720	transcript	XM_022406579.1	protein_coding	3	c.658-34951C>T
20	33974695	C	T	GATKstd	intron_variant	MODIFIER	ERC2	484720	transcript	XR_002616768.1	pseudogene	3	n.982-34951C>T
20	33974695	C	T	GATKstd	intron_variant	MODIFIER	ERC2	484720	transcript	XR_002616770.1	pseudogene	3	n.982-34951C>T
20	33974695	C	T	GATKstd	intron_variant	MODIFIER	ERC2	484720	transcript	XR_002616769.1	pseudogene	3	n.982-34951C>T
20	33974695	C	T	GATKstd	intron_variant	MODIFIER	ERC2	484720	transcript	XM_014122320.2	protein_coding	3	c.658-35620C>T
20	33974695	C	T	GATKstd	intron_variant	MODIFIER	ERC2	484720	transcript	XM_014122323.2	protein_coding	3	c.658-35620C>T
20	33974695	C	T	GATKstd	intron_variant	MODIFIER	ERC2	484720	transcript	XM_014122324.2	protein_coding	3	c.658-35620C>T
20	33974695	C	T	GATKstd	intron_variant	MODIFIER	ERC2	484720	transcript	XM_022406569.1	protein_coding	2	c.658-34951C>T
20	33974695	C	T	GATKstd	intron_variant	MODIFIER	ERC2	484720	transcript	XM_022406571.1	protein_coding	3	c.658-34951C>T
20	33974695	C	T	GATKstd	intron_variant	MODIFIER	ERC2	484720	transcript	XM_022406572.1	protein_coding	3	c.658-35620C>T
20	33974695	C	T	GATKstd	intron_variant	MODIFIER	ERC2	484720	transcript	XM_022406573.1	protein_coding	3	c.658-34951C>T
20	33974695	C	T	GATKstd	intron_variant	MODIFIER	ERC2	484720	transcript	XM_022406574.1	protein_coding	3	c.658-34951C>T
20	33974695	C	T	GATKstd	intron_variant	MODIFIER	ERC2	484720	transcript	XM_022406575.1	protein_coding	3	c.658-34951C>T
20	33974695	C	T	GATKstd	intron_variant	MODIFIER	ERC2	484720	transcript	XM_022406576.1	protein_coding	3	c.658-35620C>T
20	33974695	C	T	GATKstd	intron_variant	MODIFIER	ERC2	484720	transcript	XM_022406577.1	protein_coding	3	c.658-35620C>T
20	33974695	C	T	GATKstd	intron_variant	MODIFIER	ERC2	484720	transcript	XM_022406578.1	protein_coding	3	c.658-34951C>T
20	33974695	C	T	GATKstd	intron_variant	MODIFIER	ERC2	484720	transcript	XM_022406568.1	protein_coding	3	c.658-34951C>T
20	35089137	C	T	GATKstd	intergenic_region	MODIFIER	LOC100688690-CACNA2D3	100688690-476585	intergenic_region	100688690-476585		-1	n.35089137C>T
20	35310977	G	A	GATKstd	intron_variant	MODIFIER	CACNA2D3	476585	transcript	XM_014122124.2	protein_coding	17	c.1269+533C>T
20	35310977	G	A	GATKstd	intron_variant	MODIFIER	CACNA2D3	476585	transcript	XM_022406581.1	protein_coding	18	c.1269+533C>T
20	35310977	G	A	GATKstd	intron_variant	MODIFIER	CACNA2D3	476585	transcript	XM_022406582.1	protein_coding	17	c.1251+533C>T
20	35310977	G	A	GATKstd	intron_variant	MODIFIER	CACNA2D3	476585	transcript	XR_002616773.1	pseudogene	18	n.1956+533C>T
20	35665082	G	A	GATKstd	intron_variant	MODIFIER	CACNA2D3	476585	transcript	XM_014122124.2	protein_coding	5	c.99+15771C>T
20	35665082	G	A	GATKstd	intron_variant	MODIFIER	LOC111091311	111091311	transcript	XR_002616775.1	pseudogene	1	n.616-7012G>A
20	35665082	G	A	GATKstd	intron_variant	MODIFIER	CACNA2D3	476585	transcript	XM_022406581.1	protein_coding	6	c.99+15771C>T
20	35665082	G	A	GATKstd	intron_variant	MODIFIER	CACNA2D3	476585	transcript	XM_022406582.1	protein_coding	6	c.99+15771C>T
20	35665082	G	A	GATKstd	intron_variant	MODIFIER	CACNA2D3	476585	transcript	XR_002616773.1	pseudogene	6	n.786+15771C>T
20	39556342	ACTG	A	PASS	3_prime_UTR_variant	MODIFIER	AMIGO3	102156324	transcript	XM_005632534.3	protein_coding	1	c.*190_*192delGCT
20	39556342	ACTG	A	PASS	downstream_gene_variant	MODIFIER	GMPPB	100856660	transcript	XM_003639768.4	protein_coding	-1	c.*3540_*3542delCTG
20	39556342	ACTG	A	PASS	intron_variant	MODIFIER	RNF123	484767	transcript	XM_022406726.1	protein_coding	35	c.3512+1147_3512+1149delCAG
20	39556342	ACTG	A	PASS	intron_variant	MODIFIER	RNF123	484767	transcript	XM_014121859.2	protein_coding	35	c.3512+1147_3512+1149delCAG
20	39556342	ACTG	A	PASS	intron_variant	MODIFIER	RNF123	484767	transcript	XM_022406728.1	protein_coding	35	c.3500+1147_3500+1149delCAG
20	39556342	ACTG	A	PASS	intron_variant	MODIFIER	RNF123	484767	transcript	XM_022406729.1	protein_coding	35	c.3512+1147_3512+1149delCAG
20	39556342	ACTG	A	PASS	intron_variant	MODIFIER	RNF123	484767	transcript	XM_022406727.1	protein_coding	35	c.3512+1147_3512+1149delCAG
20	39556342	ACTG	A	PASS	intron_variant	MODIFIER	RNF123	484767	transcript	XM_005632535.3	protein_coding	35	c.3500+1147_3500+1149delCAG
20	39556342	ACTG	A	PASS	intron_variant	MODIFIER	RNF123	484767	transcript	XR_001318405.2	pseudogene	35	n.3638+1147_3638+1149delCAG
20	39556342	ACTG	A	PASS	intron_variant	MODIFIER	RNF123	484767	transcript	XM_022406730.1	protein_coding	35	c.3512+1147_3512+1149delCAG
20	39677260	G	T	GATKstd	intron_variant	MODIFIER	BSN	484769	transcript	XM_541885.5	protein_coding	1	c.221+19246C>A
20	39677260	G	T	GATKstd	intron_variant	MODIFIER	BSN	484769	transcript	XR_294977.3	pseudogene	1	n.326+19246C>A
20	39677260	G	T	GATKstd	intron_variant	MODIFIER	BSN	484769	transcript	XR_002616809.1	pseudogene	1	n.326+19246C>A
20	47653256	C	T	GATKstd	downstream_gene_variant	MODIFIER	LOC100684988	100684988	transcript	100684988	pseudogene	-1	n.*3899C>T
20	47653256	C	T	GATKstd	intergenic_region	MODIFIER	LOC100684988-OR12C09	100684988-484893	intergenic_region	100684988-484893		-1	n.47653256C>T
20	48227070	G	A	GATKstd	intergenic_region	MODIFIER	ADGRE5-LOC111091367	484904-111091367	intergenic_region	484904-111091367		-1	n.48227070G>A
20	49111012	G	A	GATKstd	downstream_gene_variant	MODIFIER	TRMT1	476692	transcript	XM_014122199.2	protein_coding	-1	c.*2319G>A
20	49111012	G	A	GATKstd	intron_variant	MODIFIER	LYL1	610908	transcript	XM_022407375.1	protein_coding	1	c.-22+199G>A
20	49667391	C	T	GATKstd	intergenic_region	MODIFIER	LOC100682654-LOC111091372	100682654-111091372	intergenic_region	100682654-111091372		-1	n.49667391C>T
20	49831194	G	A	GATKstd	3_prime_UTR_variant	MODIFIER	CNN1	484937	transcript	XM_542053.6	protein_coding	7	c.*185C>T
20	49831194	G	A	GATKstd	3_prime_UTR_variant	MODIFIER	CNN1	484937	transcript	XM_014122382.2	protein_coding	7	c.*185C>T
20	49831194	G	A	GATKstd	3_prime_UTR_variant	MODIFIER	CNN1	484937	transcript	XM_014122383.2	protein_coding	7	c.*185C>T
20	49831194	G	A	GATKstd	downstream_gene_variant	MODIFIER	ELOF1	100687887	transcript	XM_003432771.4	protein_coding	-1	c.*4418G>A
20	49831194	G	A	GATKstd	downstream_gene_variant	MODIFIER	ELOF1	100687887	transcript	XM_005632846.2	protein_coding	-1	c.*4418G>A
20	50126612	G	A	GATKstd	intron_variant	MODIFIER	LDLR	100683160	transcript	XM_005632869.3	protein_coding	10	c.1592+1710C>T
20	50126612	G	A	GATKstd	intron_variant	MODIFIER	LDLR	100683160	transcript	XM_022407043.1	protein_coding	10	c.1592+1710C>T
20	50628828	A	C	GATKstd	intergenic_region	MODIFIER	ATG4D-S1PR5	484953-610828	intergenic_region	484953-610828		-1	n.50628828A>C
20	51962712	G	A	PASS	intron_variant	MODIFIER	LOC111091382	111091382	transcript	XR_002616932.1	pseudogene	2	n.165-9894G>A
20	52299894	C	T	GATKstd	intron_variant	MODIFIER	TEX45	611499	transcript	XM_022407100.1	protein_coding	2	c.589+263C>T
20	52454829	T	A	GATKstd	intron_variant	MODIFIER	FCER2	484998	transcript	XM_022407108.1	protein_coding	7	c.520+183A>T
20	52454829	T	A	GATKstd	intron_variant	MODIFIER	FCER2	484998	transcript	XM_022407111.1	protein_coding	7	c.520+183A>T
20	52454829	T	A	GATKstd	intron_variant	MODIFIER	FCER2	484998	transcript	XM_022407113.1	protein_coding	7	c.481+183A>T
20	52454829	T	A	GATKstd	intron_variant	MODIFIER	FCER2	484998	transcript	XM_022407110.1	protein_coding	7	c.481+183A>T
20	52454829	T	A	GATKstd	intron_variant	MODIFIER	FCER2	484998	transcript	XM_022407112.1	protein_coding	8	c.481+183A>T
20	52454829	T	A	GATKstd	intron_variant	MODIFIER	FCER2	484998	transcript	XM_022407109.1	protein_coding	8	c.481+183A>T
20	52950799	C	T	GATKstd	downstream_gene_variant	MODIFIER	ANGPTL4	476724	transcript	XM_005633225.1	protein_coding	-1	c.*3419C>T
20	52950799	C	T	GATKstd	intergenic_region	MODIFIER	ANGPTL4-RAB11B	476724-611619	intergenic_region	476724-611619		-1	n.52950799C>T
20	53309103	T	G	GATKstd	intron_variant	MODIFIER	LOC100855754	100855754	transcript	XM_003639765.1	protein_coding	6	c.742-784A>C
20	53309122	C	T	GATKstd	intron_variant	MODIFIER	LOC100855754	100855754	transcript	XM_003639765.1	protein_coding	6	c.742-803G>A
20	53309126	C	A	GATKstd	intron_variant	MODIFIER	LOC100855754	100855754	transcript	XM_003639765.1	protein_coding	6	c.742-807G>T
20	53557513	C	T	GATKstd	splice_region_variant&intron_variant	LOW	GPR108	476727	transcript	XM_005632967.3	protein_coding	6	c.562-8C>T
20	53557513	C	T	GATKstd	splice_region_variant&intron_variant	LOW	GPR108	476727	transcript	XM_533931.7	protein_coding	6	c.562-8C>T
20	53557513	C	T	GATKstd	splice_region_variant&intron_variant	LOW	GPR108	476727	transcript	XM_014122103.2	protein_coding	6	c.493-8C>T
20	53557513	C	T	GATKstd	upstream_gene_variant	MODIFIER	TRIP10	476726	transcript	XM_005632968.3	protein_coding	-1	c.-3243G>A
20	53557513	C	T	GATKstd	upstream_gene_variant	MODIFIER	TRIP10	476726	transcript	XM_005632969.3	protein_coding	-1	c.-3243G>A
20	54041355	C	T	GATKstd	intron_variant	MODIFIER	RFX2	476733	transcript	XM_003432794.4	protein_coding	1	c.-9+27632C>T
20	54041355	C	T	GATKstd	intron_variant	MODIFIER	RFX2	476733	transcript	XM_005632995.3	protein_coding	1	c.-9+27632C>T
20	54210210	C	G	PASS	3_prime_UTR_variant	MODIFIER	LOC100683739	100683739	transcript	XM_003432795.4	protein_coding	1	c.*318C>G
20	54210210	C	G	PASS	downstream_gene_variant	MODIFIER	LOC106557468	106557468	transcript	XM_022407170.1	protein_coding	-1	c.*2407G>C
20	54216383	ACGCTGGCAT	A	PASS	upstream_gene_variant	MODIFIER	LOC106557468	106557468	transcript	XM_022407170.1	protein_coding	-1	c.-343_-335delATGCCAGCG
20	54216383	ACGCTGGCAT	A	PASS	upstream_gene_variant	MODIFIER	FUT5	449024	transcript	XM_022406216.1	protein_coding	-1	c.-8306_-8298delCGCTGGCAT
20	54216383	ACGCTGGCAT	A	PASS	upstream_gene_variant	MODIFIER	FUT5	449024	transcript	XM_022406217.1	protein_coding	-1	c.-8306_-8298delCGCTGGCAT
20	54216383	ACGCTGGCAT	A	PASS	upstream_gene_variant	MODIFIER	FUT5	449024	transcript	XR_002616506.1	pseudogene	-1	n.-636_-628delCGCTGGCAT
20	54216383	ACGCTGGCAT	A	PASS	upstream_gene_variant	MODIFIER	FUT5	449024	transcript	XR_002616504.1	pseudogene	-1	n.-646_-638delCGCTGGCAT
20	54216383	ACGCTGGCAT	A	PASS	intergenic_region	MODIFIER	LOC106557468-FUT5	106557468-449024	intergenic_region	106557468-449024		-1	n.54216384_54216392delCGCTGGCAT
20	54470437	G	C	GATKstd	intergenic_region	MODIFIER	SAFB2-ZNRF4	476740-485029	intergenic_region	476740-485029		-1	n.54470437G>C
20	54541031	G	A	GATKstd	intergenic_region	MODIFIER	ZNRF4-PTPRS	485029-485030	intergenic_region	485029-485030		-1	n.54541031G>A
20	56526578	C	T	GATKstd	intron_variant	MODIFIER	GNG7	612139	transcript	XM_022407261.1	protein_coding	2	c.-39+15252C>T
20	56526578	C	T	GATKstd	intron_variant	MODIFIER	GNG7	612139	transcript	XM_849868.5	protein_coding	2	c.-39+15252C>T
20	56548327	G	A	PASS	intron_variant	MODIFIER	GNG7	612139	transcript	XM_022407261.1	protein_coding	2	c.-39+37001G>A
20	56548327	G	A	PASS	intron_variant	MODIFIER	GNG7	612139	transcript	XM_849868.5	protein_coding	2	c.-39+37001G>A
21	94286	G	A	GATKstd	intergenic_region	MODIFIER	LOC111091471-LOC106560179	111091471-106560179	intergenic_region	111091471-106560179		-1	n.94286G>A
21	10030438	T	G	GATKstd	intergenic_region	MODIFIER	LOC100685679-LOC111091492	100685679-111091492	intergenic_region	100685679-111091492		-1	n.10030438T>G
21	13604554	C	G	GATKstd	upstream_gene_variant	MODIFIER	CCDC83	476781	transcript	XM_844165.5	protein_coding	-1	c.-6998G>C
21	13604554	C	G	GATKstd	upstream_gene_variant	MODIFIER	CCDC83	476781	transcript	XM_005633403.3	protein_coding	-1	c.-6998G>C
21	13604554	C	G	GATKstd	upstream_gene_variant	MODIFIER	CCDC83	476781	transcript	XM_022407568.1	protein_coding	-1	c.-6998G>C
21	13604554	C	G	GATKstd	intron_variant	MODIFIER	LOC111091500	111091500	transcript	XR_002617179.1	pseudogene	5	n.2059+808C>G
21	13604554	C	G	GATKstd	intron_variant	MODIFIER	LOC111091500	111091500	transcript	XR_002617184.1	pseudogene	5	n.2059+808C>G
21	13604554	C	G	GATKstd	intron_variant	MODIFIER	LOC111091500	111091500	transcript	XR_002617183.1	pseudogene	5	n.2059+808C>G
21	13604554	C	G	GATKstd	intron_variant	MODIFIER	LOC111091500	111091500	transcript	XR_002617176.1	pseudogene	5	n.2059+808C>G
21	13604554	C	G	GATKstd	intron_variant	MODIFIER	LOC111091500	111091500	transcript	XR_002617177.1	pseudogene	5	n.2059+808C>G
21	13604554	C	G	GATKstd	intron_variant	MODIFIER	LOC111091500	111091500	transcript	XR_002617178.1	pseudogene	5	n.2059+808C>G
21	13604554	C	G	GATKstd	intron_variant	MODIFIER	LOC111091500	111091500	transcript	XR_002617180.1	pseudogene	5	n.2059+808C>G
21	13604554	C	G	GATKstd	intron_variant	MODIFIER	LOC111091500	111091500	transcript	XR_002617181.1	pseudogene	5	n.2059+808C>G
21	13604554	C	G	GATKstd	intron_variant	MODIFIER	LOC111091500	111091500	transcript	XR_002617186.1	pseudogene	5	n.2059+808C>G
21	13604554	C	G	GATKstd	intron_variant	MODIFIER	LOC111091500	111091500	transcript	XR_002617188.1	pseudogene	5	n.2059+808C>G
21	13604554	C	G	GATKstd	intron_variant	MODIFIER	LOC111091500	111091500	transcript	XR_002617187.1	pseudogene	5	n.2037+808C>G
21	13604554	C	G	GATKstd	intron_variant	MODIFIER	LOC111091500	111091500	transcript	XR_002617185.1	pseudogene	5	n.2036+808C>G
21	17188061	T	G	GATKstd	intergenic_region	MODIFIER	LOC111091608-LOC100686166	111091608-100686166	intergenic_region	111091608-100686166		-1	n.17188061T>G
21	28009982	A	T	GATKstd	downstream_gene_variant	MODIFIER	LOC610350	610350	transcript	610350	pseudogene	-1	n.*454T>A
21	28009982	A	T	GATKstd	intergenic_region	MODIFIER	LOC100688540-LOC610350	100688540-610350	intergenic_region	100688540-610350		-1	n.28009982A>T
21	37577589	G	A	GATKstd	intron_variant	MODIFIER	CYP2R1	612993	transcript	XM_849440.5	protein_coding	1	c.225+1880C>T
21	37577591	C	G	GATKstd	intron_variant	MODIFIER	CYP2R1	612993	transcript	XM_849440.5	protein_coding	1	c.225+1878G>C
21	43720572	AAT	A	PASS	intergenic_region	MODIFIER	NELL1-LOC111091580	476888-111091580	intergenic_region	476888-111091580		-1	n.43720573_43720574delAT
21	46500619	C	G	GATKstd	intergenic_region	MODIFIER	LOC111091615-LOC111091467	111091615-111091467	intergenic_region	111091615-111091467		-1	n.46500619C>G
22	498273	T	G	PASS	intergenic_region	MODIFIER	LOC102156068-LOC102156143	102156068-102156143	intergenic_region	102156068-102156143		-1	n.498273T>G
22	546724	C	CCCCCCGACTCCCTCCACCACCCCGTTCCCT	PASS	upstream_gene_variant	MODIFIER	LOC102156143	102156143	transcript	XR_001314194.2	pseudogene	-1	n.-971_-970insAGGGAACGGGGTGGTGGAGGGAGTCGGGGG
22	546724	C	CCCCCCGACTCCCTCCACCACCCCGTTCCCT	PASS	upstream_gene_variant	MODIFIER	INTS6	476905	transcript	XM_534109.7	protein_coding	-1	c.-60180_-60179insCCCCCGACTCCCTCCACCACCCCGTTCCCT
22	546724	C	CCCCCCGACTCCCTCCACCACCCCGTTCCCT	PASS	intergenic_region	MODIFIER	LOC102156143-INTS6	102156143-476905	intergenic_region	102156143-476905		-1	n.546724_546725insCCCCCGACTCCCTCCACCACCCCGTTCCCT
22	1061721	G	A	PASS	intergenic_region	MODIFIER	RNASEH2B-LOC476906	607281-476906	intergenic_region	607281-476906		-1	n.1061721G>A
22	1524166	C	T	PASS	intergenic_region	MODIFIER	LOC111091793-LOC100682699	111091793-100682699	intergenic_region	111091793-100682699		-1	n.1524166C>T
22	3821804	TAAG	T	PASS	intergenic_region	MODIFIER	LOC100685987-LOC111091806	100685987-111091806	intergenic_region	100685987-111091806		-1	n.3821805_3821807delAAG
22	4897203	G	A	PASS	intron_variant	MODIFIER	RUBCNL	485452	transcript	XM_014106402.2	protein_coding	9	c.1089+252G>A
22	4897203	G	A	PASS	intron_variant	MODIFIER	RUBCNL	485452	transcript	XM_005634082.3	protein_coding	9	c.930+252G>A
22	5104882	C	CTCAATATGATGCAGTCTCAGCTTAGGGAAACCCATTTCTCTACACTTTGGGCAGCCTGAAGCCAGTCATTTCTTCCTATGAGGCCAATTTTAGATCCCT	PASS	intron_variant	MODIFIER	CPB2	608910	transcript	XM_846061.5	protein_coding	6	c.591+2825_591+2826insTCAATATGATGCAGTCTCAGCTTAGGGAAACCCATTTCTCTACACTTTGGGCAGCCTGAAGCCAGTCATTTCTTCCTATGAGGCCAATTTTAGATCCCT
22	5400142	T	C	PASS	intergenic_region	MODIFIER	SIAH3-LOC111091813	485454-111091813	intergenic_region	485454-111091813		-1	n.5400142T>C
22	5510486	G	A	PASS	intron_variant	MODIFIER	ERICH6B	100683849	transcript	XM_005633898.2	protein_coding	6	c.574+1881G>A
22	5510486	G	A	PASS	intron_variant	MODIFIER	SPERT	476922	transcript	XM_022408310.1	protein_coding	1	c.-297-22571C>T
22	5510486	G	A	PASS	intron_variant	MODIFIER	SPERT	476922	transcript	XM_005633901.3	protein_coding	1	c.-297-22571C>T
22	5510486	G	A	PASS	intron_variant	MODIFIER	ERICH6B	100683849	transcript	XM_022408308.1	protein_coding	6	c.574+1881G>A
22	5510486	G	A	PASS	intron_variant	MODIFIER	ERICH6B	100683849	transcript	XM_014106437.2	protein_coding	6	c.574+1881G>A
22	5510486	G	A	PASS	intron_variant	MODIFIER	ERICH6B	100683849	transcript	XM_022408309.1	protein_coding	6	c.574+1881G>A
22	5510486	G	A	PASS	intron_variant	MODIFIER	ERICH6B	100683849	transcript	XM_022408305.1	protein_coding	7	c.574+1881G>A
22	5510486	G	A	PASS	intron_variant	MODIFIER	ERICH6B	100683849	transcript	XR_002617893.1	pseudogene	6	n.826+1881G>A
22	5510486	G	A	PASS	intron_variant	MODIFIER	ERICH6B	100683849	transcript	XR_001314204.2	pseudogene	6	n.826+1881G>A
22	5510486	G	A	PASS	intron_variant	MODIFIER	ERICH6B	100683849	transcript	XM_014106435.2	protein_coding	6	c.574+1881G>A
22	5510486	G	A	PASS	intron_variant	MODIFIER	ERICH6B	100683849	transcript	XM_014106438.2	protein_coding	6	c.574+1881G>A
22	5510486	G	A	PASS	intron_variant	MODIFIER	ERICH6B	100683849	transcript	XM_022408306.1	protein_coding	7	c.574+1881G>A
22	5510486	G	A	PASS	intron_variant	MODIFIER	ERICH6B	100683849	transcript	XM_022408307.1	protein_coding	6	c.574+1881G>A
22	5510486	G	A	PASS	intron_variant	MODIFIER	ERICH6B	100683849	transcript	XM_014106439.2	protein_coding	4	c.217+1881G>A
22	5682489	CTG	C	PASS	intergenic_region	MODIFIER	SLC25A30-LOC111091814	609084-111091814	intergenic_region	609084-111091814		-1	n.5682490_5682491delTG
22	5817425	C	T	PASS	upstream_gene_variant	MODIFIER	KCTD4	485456	transcript	XM_005633904.3	protein_coding	-1	c.-13554C>T
22	5817425	C	T	PASS	intron_variant	MODIFIER	GTF2F2	609164	transcript	XM_846373.5	protein_coding	4	c.305-1512G>A
22	5958152	C	T	GATKstd	upstream_gene_variant	MODIFIER	TRNAR-CCU	111091837	transcript	111091837	pseudogene	-1	n.-4176C>T
22	5958152	C	T	GATKstd	intergenic_region	MODIFIER	GTF2F2-TRNAR-CCU	609164-111091837	intergenic_region	609164-111091837		-1	n.5958152C>T
22	9574712	A	AGG	PASS	intron_variant	MODIFIER	ELF1	476936	transcript	XM_534137.6	protein_coding	1	c.-232+8751_-232+8752insGG
22	9850015	G	GGCTCAA	PASS	intergenic_region	MODIFIER	MIR759-LOC485469	100886037-485469	intergenic_region	100886037-485469		-1	n.9850015_9850016insGCTCAA
22	9850018	T	C	PASS	intergenic_region	MODIFIER	MIR759-LOC485469	100886037-485469	intergenic_region	100886037-485469		-1	n.9850018T>C
22	9850019	T	A	PASS	intergenic_region	MODIFIER	MIR759-LOC485469	100886037-485469	intergenic_region	100886037-485469		-1	n.9850019T>A
22	47620928	T	TAGACACAGAGAGAGAGAGGCAGAGACACAGGA	PASS	intron_variant	MODIFIER	MBNL2	612815	transcript	XM_005634024.3	protein_coding	2	c.174+1719_174+1720insAGACACAGAGAGAGAGAGGCAGAGACACAGGA
22	47620928	T	TAGACACAGAGAGAGAGAGGCAGAGACACAGGA	PASS	intron_variant	MODIFIER	MBNL2	612815	transcript	XM_005634025.3	protein_coding	2	c.174+1719_174+1720insAGACACAGAGAGAGAGAGGCAGAGACACAGGA
22	47620928	T	TAGACACAGAGAGAGAGAGGCAGAGACACAGGA	PASS	intron_variant	MODIFIER	MBNL2	612815	transcript	XM_005634028.3	protein_coding	2	c.174+1719_174+1720insAGACACAGAGAGAGAGAGGCAGAGACACAGGA
22	47620928	T	TAGACACAGAGAGAGAGAGGCAGAGACACAGGA	PASS	intron_variant	MODIFIER	MBNL2	612815	transcript	XM_005634026.3	protein_coding	2	c.174+1719_174+1720insAGACACAGAGAGAGAGAGGCAGAGACACAGGA
22	47620928	T	TAGACACAGAGAGAGAGAGGCAGAGACACAGGA	PASS	intron_variant	MODIFIER	MBNL2	612815	transcript	XM_854291.5	protein_coding	2	c.174+1719_174+1720insAGACACAGAGAGAGAGAGGCAGAGACACAGGA
22	47620928	T	TAGACACAGAGAGAGAGAGGCAGAGACACAGGA	PASS	intron_variant	MODIFIER	MBNL2	612815	transcript	XM_005634027.3	protein_coding	2	c.174+1719_174+1720insAGACACAGAGAGAGAGAGGCAGAGACACAGGA
22	47620928	T	TAGACACAGAGAGAGAGAGGCAGAGACACAGGA	PASS	intron_variant	MODIFIER	MBNL2	612815	transcript	XM_005634029.3	protein_coding	2	c.174+1719_174+1720insAGACACAGAGAGAGAGAGGCAGAGACACAGGA
22	47620928	T	TAGACACAGAGAGAGAGAGGCAGAGACACAGGA	PASS	intron_variant	MODIFIER	MBNL2	612815	transcript	XM_853840.5	protein_coding	2	c.174+1719_174+1720insAGACACAGAGAGAGAGAGGCAGAGACACAGGA
22	47620928	T	TAGACACAGAGAGAGAGAGGCAGAGACACAGGA	PASS	intron_variant	MODIFIER	MBNL2	612815	transcript	XM_022408099.1	protein_coding	2	c.174+1719_174+1720insAGACACAGAGAGAGAGAGGCAGAGACACAGGA
22	49975387	A	ATTT	PASS	intron_variant	MODIFIER	PCCA	476975	transcript	XM_014106346.2	protein_coding	2	c.-31+8959_-31+8960insTTT
22	56288819	A	G	PASS	intron_variant	MODIFIER	FAM155A	100688758	transcript	XM_022408224.1	protein_coding	1	c.901-119516T>C
22	58714818	C	T	GATKstd	intron_variant	MODIFIER	COL4A2	403843	transcript	XM_022408227.1	protein_coding	2	c.105+17563C>T
23	43076789	C	A	GATKstd	intergenic_region	MODIFIER	LOC111091962-LOC106557599	111091962-106557599	intergenic_region	111091962-106557599		-1	n.43076789C>A
23	44932233	AAAGGAGGC	A	PASS	intergenic_region	MODIFIER	LOC111091988-LOC111091851	111091988-111091851	intergenic_region	111091988-111091851		-1	n.44932234_44932241delAAGGAGGC
23	44932248	A	T	PASS	intergenic_region	MODIFIER	LOC111091988-LOC111091851	111091988-111091851	intergenic_region	111091988-111091851		-1	n.44932248A>T
23	44932249	TCGTC	T	PASS	intergenic_region	MODIFIER	LOC111091988-LOC111091851	111091988-111091851	intergenic_region	111091988-111091851		-1	n.44932250_44932253delCGTC
23	44932251	G	GTTTTTTTTTTTTTTTTTTTT	PASS	intergenic_region	MODIFIER	LOC111091988-LOC111091851	111091988-111091851	intergenic_region	111091988-111091851		-1	n.44932251_44932252insTTTTTTTTTTTTTTTTTTTT
23	44932253	C	T	PASS	intergenic_region	MODIFIER	LOC111091988-LOC111091851	111091988-111091851	intergenic_region	111091988-111091851		-1	n.44932253C>T
24	7957294	A	AC	PASS	upstream_gene_variant	MODIFIER	LOC111092044	111092044	transcript	XR_002618474.1	pseudogene	-1	n.-4134_-4133insC
24	7957294	A	AC	PASS	intron_variant	MODIFIER	MACROD2	100688976	transcript	XM_014106933.2	protein_coding	5	c.418+74558_418+74559insG
24	7957294	A	AC	PASS	intron_variant	MODIFIER	MACROD2	100688976	transcript	XM_014106934.2	protein_coding	5	c.418+74558_418+74559insG
24	7957295	A	C	PASS	upstream_gene_variant	MODIFIER	LOC111092044	111092044	transcript	XR_002618474.1	pseudogene	-1	n.-4133A>C
24	7957295	A	C	PASS	intron_variant	MODIFIER	MACROD2	100688976	transcript	XM_014106933.2	protein_coding	5	c.418+74558T>G
24	7957295	A	C	PASS	intron_variant	MODIFIER	MACROD2	100688976	transcript	XM_014106934.2	protein_coding	5	c.418+74558T>G
24	7957302	A	T	PASS	upstream_gene_variant	MODIFIER	LOC111092044	111092044	transcript	XR_002618474.1	pseudogene	-1	n.-4126A>T
24	7957302	A	T	PASS	intron_variant	MODIFIER	MACROD2	100688976	transcript	XM_014106933.2	protein_coding	5	c.418+74551T>A
24	7957302	A	T	PASS	intron_variant	MODIFIER	MACROD2	100688976	transcript	XM_014106934.2	protein_coding	5	c.418+74551T>A
24	13449286	G	A	GATKstd	intron_variant	MODIFIER	PLCB1	485773	transcript	XM_014106856.1	protein_coding	25	c.2633-1556C>T
25	5077184	G	A	GATKstd	intron_variant	MODIFIER	NBEA	477305	transcript	XM_014107370.2	protein_coding	41	c.6499+5155C>T
25	5077184	G	A	GATKstd	intron_variant	MODIFIER	NBEA	477305	transcript	XM_014107377.2	protein_coding	34	c.5044+5155C>T
25	5077184	G	A	GATKstd	intron_variant	MODIFIER	NBEA	477305	transcript	XM_005635464.3	protein_coding	41	c.6481+5155C>T
25	5077184	G	A	GATKstd	intron_variant	MODIFIER	NBEA	477305	transcript	XM_005635468.3	protein_coding	39	c.6370+9114C>T
25	5077184	G	A	GATKstd	intron_variant	MODIFIER	NBEA	477305	transcript	XM_014107371.2	protein_coding	40	c.6490+5155C>T
25	5077184	G	A	GATKstd	intron_variant	MODIFIER	NBEA	477305	transcript	XM_014107372.2	protein_coding	41	c.6499+5155C>T
25	5077184	G	A	GATKstd	intron_variant	MODIFIER	NBEA	477305	transcript	XM_014107373.2	protein_coding	40	c.6466+9114C>T
25	5077184	G	A	GATKstd	intron_variant	MODIFIER	NBEA	477305	transcript	XM_014107374.2	protein_coding	41	c.6499+5155C>T
25	5077184	G	A	GATKstd	intron_variant	MODIFIER	NBEA	477305	transcript	XM_014107375.2	protein_coding	40	c.6403+5155C>T
25	5077184	G	A	GATKstd	intron_variant	MODIFIER	NBEA	477305	transcript	XM_014107376.2	protein_coding	40	c.6466+9114C>T
25	5077184	G	A	GATKstd	intron_variant	MODIFIER	NBEA	477305	transcript	XM_014107378.2	protein_coding	39	c.6457+9114C>T
25	5077184	G	A	GATKstd	intron_variant	MODIFIER	NBEA	477305	transcript	XM_022409659.1	protein_coding	41	c.6499+5155C>T
25	5077184	G	A	GATKstd	intron_variant	MODIFIER	NBEA	477305	transcript	XM_844120.5	protein_coding	40	c.6466+9114C>T
25	22399184	C	A	GATKstd	intergenic_region	MODIFIER	LOC100686034-LOC486061	100686034-486061	intergenic_region	100686034-486061		-1	n.22399184C>A
25	26397218	T	TGGG	PASS	intergenic_region	MODIFIER	BLK-FAM167A	486080-607855	intergenic_region	486080-607855		-1	n.26397218_26397219insGGG
25	28024031	A	AATTTATTTATGATAGTCACAGAGAGAGAGAGAGAGGCAGAGACACTGGCAGAGGGAG	PASS	intron_variant	MODIFIER	MSRA	608103	transcript	XM_014107567.2	protein_coding	1	c.135+18898_135+18899insCTCCCTCTGCCAGTGTCTCTGCCTCTCTCTCTCTCTCTGTGACTATCATAAATAAAT
25	30851797	G	GCGCGA	PASS	intergenic_region	MODIFIER	LOC111092296-DPYSL2	111092296-486107	intergenic_region	111092296-486107		-1	n.30851797_30851798insCGCGA
25	34385223	GGGGGGCTTT	G	PASS	intron_variant	MODIFIER	PEBP4	608950	transcript	XM_022409872.1	protein_coding	3	c.336+2763_336+2771delGGGGGCTTT
25	34385223	GGGGGGCTTT	G	PASS	intron_variant	MODIFIER	PEBP4	608950	transcript	XM_005635702.3	protein_coding	3	c.258+2763_258+2771delGGGGGCTTT
25	34385223	GGGGGGCTTT	G	PASS	intron_variant	MODIFIER	PEBP4	608950	transcript	XM_022409873.1	protein_coding	4	c.306+2763_306+2771delGGGGGCTTT
25	34385223	GGGGGGCTTT	G	PASS	intron_variant	MODIFIER	PEBP4	608950	transcript	XM_003433337.4	protein_coding	3	c.285+2763_285+2771delGGGGGCTTT
25	34385223	GGGGGGCTTT	G	PASS	intron_variant	MODIFIER	PEBP4	608950	transcript	XM_005635704.3	protein_coding	3	c.258+2763_258+2771delGGGGGCTTT
25	34385223	GGGGGGCTTT	G	PASS	intron_variant	MODIFIER	PEBP4	608950	transcript	XM_846111.4	protein_coding	3	c.258+2763_258+2771delGGGGGCTTT
25	34385223	GGGGGGCTTT	G	PASS	intron_variant	MODIFIER	PEBP4	608950	transcript	XM_005635703.3	protein_coding	3	c.258+2763_258+2771delGGGGGCTTT
25	34385223	GGGGGGCTTT	G	PASS	intron_variant	MODIFIER	PEBP4	608950	transcript	XM_022409870.1	protein_coding	2	c.258+2763_258+2771delGGGGGCTTT
25	34385223	GGGGGGCTTT	G	PASS	intron_variant	MODIFIER	PEBP4	608950	transcript	XM_022409871.1	protein_coding	2	c.258+2763_258+2771delGGGGGCTTT
25	36894077	T	TTTTTTTTTTTTTTTTTTTTC	PASS	intron_variant	MODIFIER	SLC18A1	486138	transcript	XM_005635731.2	protein_coding	13	c.1012+1806_1012+1807insTTTTTTTTTTTTTTTTTTTC
25	36894077	T	TTTTTTTTTTTTTTTTTTTTC	PASS	intron_variant	MODIFIER	SLC18A1	486138	transcript	XM_543264.4	protein_coding	12	c.1012+1806_1012+1807insTTTTTTTTTTTTTTTTTTTC
25	36894077	T	TTTTTTTTTTTTTTTTTTTTC	PASS	intron_variant	MODIFIER	SLC18A1	486138	transcript	XM_022409748.1	protein_coding	12	c.1012+1806_1012+1807insTTTTTTTTTTTTTTTTTTTC
25	36894077	T	TTTTTTTTTTTTTTTTTTTTC	PASS	intron_variant	MODIFIER	SLC18A1	486138	transcript	XM_005635732.2	protein_coding	12	c.1012+1806_1012+1807insTTTTTTTTTTTTTTTTTTTC
25	36894077	T	TTTTTTTTTTTTTTTTTTTTC	PASS	intron_variant	MODIFIER	SLC18A1	486138	transcript	XM_022409749.1	protein_coding	12	c.1012+1806_1012+1807insTTTTTTTTTTTTTTTTTTTC
25	44901115	C	T	GATKstd	upstream_gene_variant	MODIFIER	DGKD	486167	transcript	XM_005635871.3	protein_coding	-1	c.-4754C>T
25	44901115	C	T	GATKstd	intron_variant	MODIFIER	DGKD	486167	transcript	XM_022409579.1	protein_coding	3	c.250-22148C>T
25	44901115	C	T	GATKstd	intron_variant	MODIFIER	DGKD	486167	transcript	XM_005635867.3	protein_coding	3	c.235-22148C>T
25	44901115	C	T	GATKstd	intron_variant	MODIFIER	DGKD	486167	transcript	XR_002618942.1	pseudogene	3	n.265-22148C>T
25	44901115	C	T	GATKstd	intron_variant	MODIFIER	DGKD	486167	transcript	XM_005635868.3	protein_coding	3	c.220-22148C>T
25	45075684	A	G	GATKstd	downstream_gene_variant	MODIFIER	LOC100688694	100688694	transcript	XM_014107590.2	protein_coding	-1	c.*2818A>G
25	45075684	A	G	GATKstd	intergenic_region	MODIFIER	LOC100688694-UGT1A6	100688694-403629	intergenic_region	100688694-403629		-1	n.45075684A>G
26	17936600	A	G	GATKstd	intron_variant	MODIFIER	USP30	611662	transcript	XM_022410540.1	protein_coding	4	c.432+1047T>C
26	17936600	A	G	GATKstd	intron_variant	MODIFIER	USP30	611662	transcript	XM_005636331.3	protein_coding	4	c.387+1047T>C
26	17936600	A	G	GATKstd	intron_variant	MODIFIER	USP30	611662	transcript	XM_014107875.2	protein_coding	4	c.387+1047T>C
26	17936600	A	G	GATKstd	intron_variant	MODIFIER	USP30	611662	transcript	XM_014107876.2	protein_coding	4	c.387+1047T>C
26	17936600	A	G	GATKstd	intron_variant	MODIFIER	USP30	611662	transcript	XM_022410542.1	protein_coding	5	c.423+1047T>C
26	26296369	C	CCACTGAAGGTCTGGGGAAGAAAGCTTCTGACCTAAGAACCTTTGAATAAAGGGGGAGCCTCTAAGTCCAGAGACAACAGAAACCACGCATGAG	PASS	intergenic_region	MODIFIER	LOC111092545-LOC100685445	111092545-100685445	intergenic_region	111092545-100685445		-1	n.26296369_26296370insCACTGAAGGTCTGGGGAAGAAAGCTTCTGACCTAAGAACCTTTGAATAAAGGGGGAGCCTCTAAGTCCAGAGACAACAGAAACCACGCATGAG
26	27256882	G	T	GATKstd	intron_variant	MODIFIER	LOC607368	607368	transcript	XM_014108148.2	protein_coding	2	c.368+327593G>T
26	27256882	G	T	GATKstd	intron_variant	MODIFIER	LOC607368	607368	transcript	XM_014108163.2	protein_coding	2	c.366-348295G>T
26	27256882	G	T	GATKstd	intron_variant	MODIFIER	LOC607368	607368	transcript	XM_014108164.2	protein_coding	3	c.366-348295G>T
26	27256882	G	T	GATKstd	intron_variant	MODIFIER	LOC607368	607368	transcript	XM_022410581.1	protein_coding	3	c.365+336488G>T
26	27256882	G	T	GATKstd	intron_variant	MODIFIER	LOC607368	607368	transcript	XM_014108175.2	protein_coding	3	c.366-348295G>T
26	27256882	G	T	GATKstd	intron_variant	MODIFIER	LOC607368	607368	transcript	XM_022410575.1	protein_coding	3	c.365+336488G>T
26	27256882	G	T	GATKstd	intron_variant	MODIFIER	LOC607368	607368	transcript	XM_022410576.1	protein_coding	2	c.366-348295G>T
26	27256882	G	T	GATKstd	intron_variant	MODIFIER	LOC607368	607368	transcript	XM_014108157.1	protein_coding	2	c.366-361870G>T
26	27256882	G	T	GATKstd	intron_variant	MODIFIER	LOC607368	607368	transcript	XM_014108178.2	protein_coding	2	c.363-348295G>T
26	27256882	G	T	GATKstd	intron_variant	MODIFIER	LOC607368	607368	transcript	XM_014108179.2	protein_coding	3	c.363-348295G>T
26	27256882	G	T	GATKstd	intron_variant	MODIFIER	LOC607368	607368	transcript	XM_022410583.1	protein_coding	2	c.366-348295G>T
26	27256882	G	T	GATKstd	intron_variant	MODIFIER	LOC607368	607368	transcript	XM_022410584.1	protein_coding	3	c.366-348295G>T
26	27256882	G	T	GATKstd	intron_variant	MODIFIER	LOC607368	607368	transcript	XM_022410578.1	protein_coding	3	c.366-348295G>T
26	27256882	G	T	GATKstd	intron_variant	MODIFIER	LOC607368	607368	transcript	XM_022410579.1	protein_coding	2	c.366-348295G>T
26	27256882	G	T	GATKstd	intron_variant	MODIFIER	LOC607368	607368	transcript	XM_022410587.1	protein_coding	2	c.363-348295G>T
26	27256882	G	T	GATKstd	intron_variant	MODIFIER	LOC607368	607368	transcript	XM_022410588.1	protein_coding	3	c.363-348295G>T
26	27256882	G	T	GATKstd	intron_variant	MODIFIER	LOC607368	607368	transcript	XM_022410577.1	protein_coding	2	c.366-361870G>T
26	27256882	G	T	GATKstd	intron_variant	MODIFIER	LOC607368	607368	transcript	XM_022410585.1	protein_coding	3	c.366-348295G>T
26	27256882	G	T	GATKstd	intron_variant	MODIFIER	LOC607368	607368	transcript	XM_022410573.1	protein_coding	2	c.363-357391G>T
26	27256882	G	T	GATKstd	intron_variant	MODIFIER	LOC607368	607368	transcript	XM_022410580.1	protein_coding	3	c.366-348295G>T
26	27256882	G	T	GATKstd	intron_variant	MODIFIER	LOC607368	607368	transcript	XM_022410586.1	protein_coding	2	c.363-357391G>T
26	27256882	G	T	GATKstd	intron_variant	MODIFIER	LOC607368	607368	transcript	XM_014108150.2	protein_coding	2	c.368+327593G>T
26	27256882	G	T	GATKstd	intron_variant	MODIFIER	LOC607368	607368	transcript	XM_014108151.2	protein_coding	2	c.365+327596G>T
26	27256882	G	T	GATKstd	intron_variant	MODIFIER	LOC607368	607368	transcript	XM_022410572.1	protein_coding	3	c.368+287942G>T
26	27256882	G	T	GATKstd	intron_variant	MODIFIER	LOC607368	607368	transcript	XM_022410569.1	protein_coding	2	c.368+327593G>T
26	27256882	G	T	GATKstd	intron_variant	MODIFIER	LOC607368	607368	transcript	XM_022410570.1	protein_coding	2	c.365+327596G>T
26	27256882	G	T	GATKstd	intron_variant	MODIFIER	LOC607368	607368	transcript	XM_022410571.1	protein_coding	3	c.368+287942G>T
26	27256882	G	T	GATKstd	intron_variant	MODIFIER	LOC607368	607368	transcript	XM_014108154.2	protein_coding	2	c.365+327596G>T
26	27256882	G	T	GATKstd	intron_variant	MODIFIER	LOC607368	607368	transcript	XM_014108156.2	protein_coding	2	c.365+327596G>T
26	27256882	G	T	GATKstd	intron_variant	MODIFIER	LOC607368	607368	transcript	XM_022410589.1	protein_coding	2	c.353+91498G>T
26	27256882	G	T	GATKstd	intron_variant	MODIFIER	LOC607368	607368	transcript	XM_022410590.1	protein_coding	2	c.353+91498G>T
26	27726966	A	C	PASS	intron_variant	MODIFIER	LOC607647	607647	transcript	XM_022410342.1	protein_coding	8	c.899+4779A>C
26	32338196	AG	A	PASS	intergenic_region	MODIFIER	LOC111092549-ZWINT	111092549-477579	intergenic_region	111092549-477579		-1	n.32338197delG
26	32338199	AAGG	A	PASS	intergenic_region	MODIFIER	LOC111092549-ZWINT	111092549-477579	intergenic_region	111092549-477579		-1	n.32338200_32338202delAGG
27	5652045	C	T	PASS	upstream_gene_variant	MODIFIER	CCDC65	477622	transcript	XM_534816.6	protein_coding	-1	c.-2126G>A
27	5652045	C	T	PASS	intergenic_region	MODIFIER	CCDC65-RND1	477622-477623	intergenic_region	477622-477623		-1	n.5652045C>T
27	6212919	C	CAGA	PASS	intergenic_region	MODIFIER	COR8T4-COR8T2	486579-486580	intergenic_region	486579-486580		-1	n.6212919_6212920insAGA
27	6333294	G	A	PASS	intergenic_region	MODIFIER	LOC100687139-OR12B11	100687139-486583	intergenic_region	100687139-486583		-1	n.6333294G>A
27	6503400	G	A	GATKstd	upstream_gene_variant	MODIFIER	LOC486584	486584	transcript	XM_014108286.1	protein_coding	-1	c.-134G>A
27	6503400	G	A	GATKstd	intergenic_region	MODIFIER	LOC100687449-LOC486584	100687449-486584	intergenic_region	100687449-486584		-1	n.6503400G>A
27	11289687	T	G	PASS	intergenic_region	MODIFIER	LOC111092904-PRICKLE1	111092904-100856007	intergenic_region	111092904-100856007		-1	n.11289687T>G
27	11674774	A	G	PASS	upstream_gene_variant	MODIFIER	YAF2	609790	transcript	XM_014108587.2	protein_coding	-1	c.-1613A>G
27	11674774	A	G	PASS	upstream_gene_variant	MODIFIER	YAF2	609790	transcript	XM_022410901.1	protein_coding	-1	c.-1603A>G
27	11674774	A	G	PASS	upstream_gene_variant	MODIFIER	YAF2	609790	transcript	XR_002619925.1	pseudogene	-1	n.-1570A>G
27	11674774	A	G	PASS	upstream_gene_variant	MODIFIER	YAF2	609790	transcript	XR_002619926.1	pseudogene	-1	n.-4130A>G
27	11674774	A	G	PASS	upstream_gene_variant	MODIFIER	YAF2	609790	transcript	XR_002619924.1	pseudogene	-1	n.-4130A>G
27	11674774	A	G	PASS	intron_variant	MODIFIER	LOC106557903	106557903	transcript	XR_002620132.1	pseudogene	2	n.198+147T>C
27	11674774	A	G	PASS	intron_variant	MODIFIER	LOC106557903	106557903	transcript	XR_002620135.1	pseudogene	2	n.198+147T>C
27	11674774	A	G	PASS	intron_variant	MODIFIER	LOC106557903	106557903	transcript	XR_002620136.1	pseudogene	2	n.198+147T>C
27	11674774	A	G	PASS	intron_variant	MODIFIER	LOC106557903	106557903	transcript	XR_002620139.1	pseudogene	2	n.198+147T>C
27	11674774	A	G	PASS	intron_variant	MODIFIER	LOC106557903	106557903	transcript	XR_002620133.1	pseudogene	2	n.198+147T>C
27	11674774	A	G	PASS	intron_variant	MODIFIER	LOC106557903	106557903	transcript	XR_002620134.1	pseudogene	2	n.198+147T>C
27	11674774	A	G	PASS	intron_variant	MODIFIER	LOC106557903	106557903	transcript	XR_002620140.1	pseudogene	2	n.198+147T>C
27	11674774	A	G	PASS	intron_variant	MODIFIER	LOC106557903	106557903	transcript	XR_002620137.1	pseudogene	2	n.198+147T>C
27	11674774	A	G	PASS	non_coding_transcript_exon_variant	MODIFIER	LOC106557903	106557903	transcript	XR_001314663.2	pseudogene	2	n.345T>C
27	12314287	GTTC	G	PASS	intron_variant	MODIFIER	PDZRN4	100856107	transcript	XM_003639968.4	protein_coding	1	c.70-32533_70-32531delGAA
27	12314287	GTTC	G	PASS	intron_variant	MODIFIER	PDZRN4	100856107	transcript	XM_022411099.1	protein_coding	1	c.-144-32533_-144-32531delGAA
27	12314287	GTTC	G	PASS	intron_variant	MODIFIER	PDZRN4	100856107	transcript	XM_022411100.1	protein_coding	1	c.-144-32533_-144-32531delGAA
27	12314287	GTTC	G	PASS	intron_variant	MODIFIER	PDZRN4	100856107	transcript	XM_022411101.1	protein_coding	1	c.-144-32533_-144-32531delGAA
27	12771427	A	G	PASS	intron_variant	MODIFIER	CNTN1	477641	transcript	XM_005636975.3	protein_coding	14	c.1683+5349T>C
27	12771427	A	G	PASS	intron_variant	MODIFIER	CNTN1	477641	transcript	XM_022410939.1	protein_coding	14	c.1683+5349T>C
27	12771427	A	G	PASS	intron_variant	MODIFIER	CNTN1	477641	transcript	XM_846737.5	protein_coding	15	c.1683+5349T>C
27	12771427	A	G	PASS	intron_variant	MODIFIER	CNTN1	477641	transcript	XM_014108600.2	protein_coding	14	c.1683+5349T>C
27	12771427	A	G	PASS	intron_variant	MODIFIER	CNTN1	477641	transcript	XM_005636976.3	protein_coding	15	c.1683+5349T>C
27	12771661	G	GAC	PASS	intron_variant	MODIFIER	CNTN1	477641	transcript	XM_005636975.3	protein_coding	14	c.1683+5114_1683+5115insGT
27	12771661	G	GAC	PASS	intron_variant	MODIFIER	CNTN1	477641	transcript	XM_022410939.1	protein_coding	14	c.1683+5114_1683+5115insGT
27	12771661	G	GAC	PASS	intron_variant	MODIFIER	CNTN1	477641	transcript	XM_846737.5	protein_coding	15	c.1683+5114_1683+5115insGT
27	12771661	G	GAC	PASS	intron_variant	MODIFIER	CNTN1	477641	transcript	XM_014108600.2	protein_coding	14	c.1683+5114_1683+5115insGT
27	12771661	G	GAC	PASS	intron_variant	MODIFIER	CNTN1	477641	transcript	XM_005636976.3	protein_coding	15	c.1683+5114_1683+5115insGT
27	12842550	G	A	PASS	intron_variant	MODIFIER	CNTN1	477641	transcript	XM_005636975.3	protein_coding	1	c.-72-23008C>T
27	12842550	G	A	PASS	intron_variant	MODIFIER	CNTN1	477641	transcript	XM_022410939.1	protein_coding	1	c.-73+20961C>T
27	12842550	G	A	PASS	intron_variant	MODIFIER	CNTN1	477641	transcript	XM_846737.5	protein_coding	2	c.-72-23008C>T
27	12842550	G	A	PASS	intron_variant	MODIFIER	CNTN1	477641	transcript	XM_014108600.2	protein_coding	1	c.-72-23008C>T
27	12842550	G	A	PASS	intron_variant	MODIFIER	CNTN1	477641	transcript	XM_005636976.3	protein_coding	2	c.-72-23008C>T
27	12858775	C	T	PASS	intron_variant	MODIFIER	CNTN1	477641	transcript	XM_005636975.3	protein_coding	1	c.-73+26941G>A
27	12858775	C	T	PASS	intron_variant	MODIFIER	CNTN1	477641	transcript	XM_022410939.1	protein_coding	1	c.-73+4736G>A
27	12858775	C	T	PASS	intron_variant	MODIFIER	CNTN1	477641	transcript	XM_846737.5	protein_coding	2	c.-72-39233G>A
27	12858775	C	T	PASS	intron_variant	MODIFIER	CNTN1	477641	transcript	XM_014108600.2	protein_coding	1	c.-72-39233G>A
27	12858775	C	T	PASS	intron_variant	MODIFIER	CNTN1	477641	transcript	XM_005636976.3	protein_coding	2	c.-72-39233G>A
27	13183344	G	A	GATKstd	intron_variant	MODIFIER	MUC19	102156424	transcript	XM_022411498.1	protein_coding	52	c.5414-263C>T
27	16136864	T	C	GATKstd	upstream_gene_variant	MODIFIER	YARS2	486614	transcript	XM_543740.6	protein_coding	-1	c.-2635T>C
27	16136864	T	C	GATKstd	upstream_gene_variant	MODIFIER	YARS2	486614	transcript	XR_002620315.1	pseudogene	-1	n.-2598T>C
27	16136864	T	C	GATKstd	intergenic_region	MODIFIER	LOC111092833-YARS2	111092833-486614	intergenic_region	111092833-486614		-1	n.16136864T>C
27	18921483	G	A	GATKstd	intron_variant	MODIFIER	LOC111092877	111092877	transcript	XR_002620313.1	pseudogene	2	n.255-7005C>T
27	20720920	A	G	PASS	intron_variant	MODIFIER	INTS13	486627	transcript	NM_001197314.1	protein_coding	7	c.890-480A>G
27	20720920	A	G	PASS	intron_variant	MODIFIER	INTS13	486627	transcript	XM_005636713.3	protein_coding	8	c.890-480A>G
27	20720920	A	G	PASS	intron_variant	MODIFIER	INTS13	486627	transcript	XM_005636714.3	protein_coding	8	c.890-480A>G
27	20720920	A	G	PASS	intron_variant	MODIFIER	INTS13	486627	transcript	XM_022410862.1	protein_coding	8	c.889+2259A>G
27	20720920	A	G	PASS	intron_variant	MODIFIER	INTS13	486627	transcript	XM_022410863.1	protein_coding	7	c.587-480A>G
27	20720920	A	G	PASS	intron_variant	MODIFIER	INTS13	486627	transcript	XM_022410864.1	protein_coding	6	c.587-480A>G
27	22121087	G	A	PASS	intergenic_region	MODIFIER	LMNTD1-KRAS	100856494-403871	intergenic_region	100856494-403871		-1	n.22121087G>A
27	22827572	A	ATTTTC	PASS	intergenic_region	MODIFIER	BCAT1-LOC609391	486633-609391	intergenic_region	486633-609391		-1	n.22827572_22827573insTTTTC
27	22955278	C	G	PASS	intron_variant	MODIFIER	SOX5	486635	transcript	XM_022411392.1	protein_coding	1	c.-324-51679C>G
27	22955278	C	G	PASS	intron_variant	MODIFIER	SOX5	486635	transcript	XM_022411393.1	protein_coding	1	c.-406-51679C>G
27	22955278	C	G	PASS	intron_variant	MODIFIER	SOX5	486635	transcript	XM_014108358.2	protein_coding	1	c.-324-51679C>G
27	22955278	C	G	PASS	intron_variant	MODIFIER	SOX5	486635	transcript	XM_022411394.1	protein_coding	1	c.-313-51679C>G
27	22955278	C	G	PASS	intron_variant	MODIFIER	SOX5	486635	transcript	XM_014108356.2	protein_coding	1	c.-324-51679C>G
27	22955278	C	G	PASS	intron_variant	MODIFIER	SOX5	486635	transcript	XM_022411391.1	protein_coding	1	c.-325+23962C>G
27	22995852	A	G	GATKstd	upstream_gene_variant	MODIFIER	SOX5	486635	transcript	XM_022411390.1	protein_coding	-1	c.-512613A>G
27	22995852	A	G	GATKstd	intron_variant	MODIFIER	SOX5	486635	transcript	XM_022411392.1	protein_coding	1	c.-324-11105A>G
27	22995852	A	G	GATKstd	intron_variant	MODIFIER	SOX5	486635	transcript	XM_022411393.1	protein_coding	1	c.-406-11105A>G
27	22995852	A	G	GATKstd	intron_variant	MODIFIER	SOX5	486635	transcript	XM_014108358.2	protein_coding	1	c.-324-11105A>G
27	22995852	A	G	GATKstd	intron_variant	MODIFIER	SOX5	486635	transcript	XM_022411394.1	protein_coding	1	c.-313-11105A>G
27	22995852	A	G	GATKstd	intron_variant	MODIFIER	SOX5	486635	transcript	XM_014108356.2	protein_coding	1	c.-324-11105A>G
27	22995852	A	G	GATKstd	intron_variant	MODIFIER	SOX5	486635	transcript	XM_022411391.1	protein_coding	1	c.-324-11105A>G
27	23906417	G	A	PASS	intergenic_region	MODIFIER	SOX5-LOC111092848	486635-111092848	intergenic_region	486635-111092848		-1	n.23906417G>A
27	26950392	T	G	PASS	intergenic_region	MODIFIER	PDE3A-LOC100682607	610836-100682607	intergenic_region	610836-100682607		-1	n.26950392T>G
27	27392795	CT	C	PASS	upstream_gene_variant	MODIFIER	LOC100682682	100682682	transcript	100682682	pseudogene	-1	n.-908delT
27	27392795	CT	C	PASS	intergenic_region	MODIFIER	LOC100687563-LOC100682682	100687563-100682682	intergenic_region	100687563-100682682		-1	n.27392796delT
27	28567856	A	ACAGAACAGACTTTATTTTTTTTTTTTTTTTTTTTTTTTTTTTTTTTTTTTTTTTTTTTTTTTTTTTTTTTTTT	PASS	downstream_gene_variant	MODIFIER	LOC111092748	111092748	transcript	XR_002620000.1	pseudogene	-1	n.*1338_*1339insCAGAACAGACTTTATTTTTTTTTTTTTTTTTTTTTTTTTTTTTTTTTTTTTTTTTTTTTTTTTTTTTTTTTTT
27	28567856	A	ACAGAACAGACTTTATTTTTTTTTTTTTTTTTTTTTTTTTTTTTTTTTTTTTTTTTTTTTTTTTTTTTTTTTTT	PASS	intron_variant	MODIFIER	PIK3C2G	477681	transcript	XM_014108746.2	protein_coding	24	c.3323+7939_3323+7940insAAAAAAAAAAAAAAAAAAAAAAAAAAAAAAAAAAAAAAAAAAAAAAAAAAAAAAAAAAATAAAGTCTGTTCTG
27	28567856	A	ACAGAACAGACTTTATTTTTTTTTTTTTTTTTTTTTTTTTTTTTTTTTTTTTTTTTTTTTTTTTTTTTTTTTTT	PASS	intron_variant	MODIFIER	PIK3C2G	477681	transcript	XM_022411029.1	protein_coding	24	c.3323+7939_3323+7940insAAAAAAAAAAAAAAAAAAAAAAAAAAAAAAAAAAAAAAAAAAAAAAAAAAAAAAAAAAATAAAGTCTGTTCTG
27	28567856	A	ACAGAACAGACTTTATTTTTTTTTTTTTTTTTTTTTTTTTTTTTTTTTTTTTTTTTTTTTTTTTTTTTTTTTTT	PASS	intron_variant	MODIFIER	PIK3C2G	477681	transcript	XM_022411030.1	protein_coding	24	c.3323+7939_3323+7940insAAAAAAAAAAAAAAAAAAAAAAAAAAAAAAAAAAAAAAAAAAAAAAAAAAAAAAAAAAATAAAGTCTGTTCTG
27	28567856	A	ACAGAACAGACTTTATTTTTTTTTTTTTTTTTTTTTTTTTTTTTTTTTTTTTTTTTTTTTTTTTTTTTTTTTTT	PASS	intron_variant	MODIFIER	PIK3C2G	477681	transcript	XR_002619991.1	pseudogene	24	n.3485+7939_3485+7940insAAAAAAAAAAAAAAAAAAAAAAAAAAAAAAAAAAAAAAAAAAAAAAAAAAAAAAAAAAATAAAGTCTGTTCTG
27	28697048	A	T	PASS	intron_variant	MODIFIER	PIK3C2G	477681	transcript	XM_014108746.2	protein_coding	13	c.1881-1938T>A
27	28697048	A	T	PASS	intron_variant	MODIFIER	PIK3C2G	477681	transcript	XM_022411029.1	protein_coding	13	c.1881-1938T>A
27	28697048	A	T	PASS	intron_variant	MODIFIER	PIK3C2G	477681	transcript	XM_022411030.1	protein_coding	13	c.1881-1938T>A
27	28697048	A	T	PASS	intron_variant	MODIFIER	PIK3C2G	477681	transcript	XR_002619991.1	pseudogene	13	n.2043-1938T>A
27	29275239	T	A	GATKstd	intron_variant	MODIFIER	LOC111092899	111092899	transcript	XR_002620366.1	pseudogene	3	n.320-1158A>T
27	30156956	T	A	PASS	upstream_gene_variant	MODIFIER	LMO3	486662	transcript	XM_005637097.3	protein_coding	-1	c.-318T>A
27	30156956	T	A	PASS	intron_variant	MODIFIER	LMO3	486662	transcript	XM_005637103.3	protein_coding	1	c.-8-2684T>A
27	30156956	T	A	PASS	intron_variant	MODIFIER	LMO3	486662	transcript	XM_005637101.3	protein_coding	1	c.-8-2684T>A
27	30156956	T	A	PASS	intron_variant	MODIFIER	LMO3	486662	transcript	XM_022411066.1	protein_coding	2	c.-9+2494T>A
27	30156956	T	A	PASS	intron_variant	MODIFIER	LMO3	486662	transcript	XM_005637102.3	protein_coding	1	c.-8-2684T>A
27	30156956	T	A	PASS	intron_variant	MODIFIER	LMO3	486662	transcript	XM_005637098.3	protein_coding	2	c.-9+2494T>A
27	30156956	T	A	PASS	intron_variant	MODIFIER	LMO3	486662	transcript	XM_005637100.3	protein_coding	2	c.-9+2494T>A
27	30156956	T	A	PASS	intron_variant	MODIFIER	LMO3	486662	transcript	XM_005637099.3	protein_coding	2	c.-9+2494T>A
27	30156956	T	A	PASS	intron_variant	MODIFIER	LMO3	486662	transcript	XM_014108640.2	protein_coding	1	c.-9+2494T>A
27	30156956	T	A	PASS	intron_variant	MODIFIER	LMO3	486662	transcript	XM_003433569.4	protein_coding	1	c.25+1304T>A
28	28212984	G	A	PASS	intergenic_region	MODIFIER	LOC102156401-LOC102156694	102156401-102156694	intergenic_region	102156401-102156694		-1	n.28212984G>A
28	33788662	C	T	GATKstd	intron_variant	MODIFIER	OAT	477858	transcript	XM_005637828.2	protein_coding	1	c.-114+54G>A
28	33788662	C	T	GATKstd	intron_variant	MODIFIER	OAT	477858	transcript	XM_014109077.2	protein_coding	1	c.-331+54G>A
28	33788662	C	T	GATKstd	intron_variant	MODIFIER	OAT	477858	transcript	XM_022411766.1	protein_coding	1	c.-472+54G>A
28	33788662	C	T	GATKstd	intron_variant	MODIFIER	OAT	477858	transcript	XM_022411767.1	protein_coding	1	c.-520+54G>A
28	33788662	C	T	GATKstd	intron_variant	MODIFIER	OAT	477858	transcript	XM_022411769.1	protein_coding	1	c.-303+54G>A
28	33788662	C	T	GATKstd	intron_variant	MODIFIER	OAT	477858	transcript	XM_860971.4	protein_coding	1	c.-283+54G>A
29	16687945	A	T	PASS	intron_variant	MODIFIER	CSPP1	477902	transcript	XM_022412446.1	protein_coding	23	c.2524-1708A>T
29	16687945	A	T	PASS	intron_variant	MODIFIER	CSPP1	477902	transcript	XM_022412450.1	protein_coding	22	c.2524-1708A>T
29	16687945	A	T	PASS	intron_variant	MODIFIER	CSPP1	477902	transcript	XM_022412449.1	protein_coding	21	c.2524-1708A>T
29	16687945	A	T	PASS	intron_variant	MODIFIER	CSPP1	477902	transcript	XM_014109210.2	protein_coding	21	c.2521-1708A>T
29	16687945	A	T	PASS	intron_variant	MODIFIER	CSPP1	477902	transcript	XM_014109211.2	protein_coding	20	c.2500-1708A>T
29	16687945	A	T	PASS	intron_variant	MODIFIER	CSPP1	477902	transcript	XM_014109212.2	protein_coding	20	c.2425-1708A>T
29	16687945	A	T	PASS	intron_variant	MODIFIER	CSPP1	477902	transcript	XM_014109214.2	protein_coding	20	c.2371-1708A>T
29	16687945	A	T	PASS	intron_variant	MODIFIER	CSPP1	477902	transcript	XM_014109215.2	protein_coding	19	c.2323-1708A>T
29	16687945	A	T	PASS	intron_variant	MODIFIER	CSPP1	477902	transcript	XM_014109216.2	protein_coding	16	c.1993-1708A>T
29	16687945	A	T	PASS	intron_variant	MODIFIER	CSPP1	477902	transcript	XM_014109217.2	protein_coding	14	c.1792-1708A>T
29	16687945	A	T	PASS	intron_variant	MODIFIER	CSPP1	477902	transcript	XM_022412447.1	protein_coding	21	c.2524-1708A>T
29	16687945	A	T	PASS	intron_variant	MODIFIER	CSPP1	477902	transcript	XM_022412448.1	protein_coding	21	c.2524-1708A>T
29	16687945	A	T	PASS	intron_variant	MODIFIER	CSPP1	477902	transcript	XR_002621132.1	pseudogene	21	n.2667-1708A>T
29	16687947	A	T	PASS	intron_variant	MODIFIER	CSPP1	477902	transcript	XM_022412446.1	protein_coding	23	c.2524-1706A>T
29	16687947	A	T	PASS	intron_variant	MODIFIER	CSPP1	477902	transcript	XM_022412450.1	protein_coding	22	c.2524-1706A>T
29	16687947	A	T	PASS	intron_variant	MODIFIER	CSPP1	477902	transcript	XM_022412449.1	protein_coding	21	c.2524-1706A>T
29	16687947	A	T	PASS	intron_variant	MODIFIER	CSPP1	477902	transcript	XM_014109210.2	protein_coding	21	c.2521-1706A>T
29	16687947	A	T	PASS	intron_variant	MODIFIER	CSPP1	477902	transcript	XM_014109211.2	protein_coding	20	c.2500-1706A>T
29	16687947	A	T	PASS	intron_variant	MODIFIER	CSPP1	477902	transcript	XM_014109212.2	protein_coding	20	c.2425-1706A>T
29	16687947	A	T	PASS	intron_variant	MODIFIER	CSPP1	477902	transcript	XM_014109214.2	protein_coding	20	c.2371-1706A>T
29	16687947	A	T	PASS	intron_variant	MODIFIER	CSPP1	477902	transcript	XM_014109215.2	protein_coding	19	c.2323-1706A>T
29	16687947	A	T	PASS	intron_variant	MODIFIER	CSPP1	477902	transcript	XM_014109216.2	protein_coding	16	c.1993-1706A>T
29	16687947	A	T	PASS	intron_variant	MODIFIER	CSPP1	477902	transcript	XM_014109217.2	protein_coding	14	c.1792-1706A>T
29	16687947	A	T	PASS	intron_variant	MODIFIER	CSPP1	477902	transcript	XM_022412447.1	protein_coding	21	c.2524-1706A>T
29	16687947	A	T	PASS	intron_variant	MODIFIER	CSPP1	477902	transcript	XM_022412448.1	protein_coding	21	c.2524-1706A>T
29	16687947	A	T	PASS	intron_variant	MODIFIER	CSPP1	477902	transcript	XR_002621132.1	pseudogene	21	n.2667-1706A>T
29	16687948	A	T	PASS	intron_variant	MODIFIER	CSPP1	477902	transcript	XM_022412446.1	protein_coding	23	c.2524-1705A>T
29	16687948	A	T	PASS	intron_variant	MODIFIER	CSPP1	477902	transcript	XM_022412450.1	protein_coding	22	c.2524-1705A>T
29	16687948	A	T	PASS	intron_variant	MODIFIER	CSPP1	477902	transcript	XM_022412449.1	protein_coding	21	c.2524-1705A>T
29	16687948	A	T	PASS	intron_variant	MODIFIER	CSPP1	477902	transcript	XM_014109210.2	protein_coding	21	c.2521-1705A>T
29	16687948	A	T	PASS	intron_variant	MODIFIER	CSPP1	477902	transcript	XM_014109211.2	protein_coding	20	c.2500-1705A>T
29	16687948	A	T	PASS	intron_variant	MODIFIER	CSPP1	477902	transcript	XM_014109212.2	protein_coding	20	c.2425-1705A>T
29	16687948	A	T	PASS	intron_variant	MODIFIER	CSPP1	477902	transcript	XM_014109214.2	protein_coding	20	c.2371-1705A>T
29	16687948	A	T	PASS	intron_variant	MODIFIER	CSPP1	477902	transcript	XM_014109215.2	protein_coding	19	c.2323-1705A>T
29	16687948	A	T	PASS	intron_variant	MODIFIER	CSPP1	477902	transcript	XM_014109216.2	protein_coding	16	c.1993-1705A>T
29	16687948	A	T	PASS	intron_variant	MODIFIER	CSPP1	477902	transcript	XM_014109217.2	protein_coding	14	c.1792-1705A>T
29	16687948	A	T	PASS	intron_variant	MODIFIER	CSPP1	477902	transcript	XM_022412447.1	protein_coding	21	c.2524-1705A>T
29	16687948	A	T	PASS	intron_variant	MODIFIER	CSPP1	477902	transcript	XM_022412448.1	protein_coding	21	c.2524-1705A>T
29	16687948	A	T	PASS	intron_variant	MODIFIER	CSPP1	477902	transcript	XR_002621132.1	pseudogene	21	n.2667-1705A>T
29	25744992	A	G	GATKstd	intron_variant	MODIFIER	LOC111093168	111093168	transcript	XR_002620987.1	pseudogene	3	n.554+19773T>C
29	25744992	A	G	GATKstd	intron_variant	MODIFIER	LOC111093168	111093168	transcript	XR_002620986.1	pseudogene	2	n.396+19773T>C
29	25744992	A	G	GATKstd	intron_variant	MODIFIER	LOC111093168	111093168	transcript	XR_002620985.1	pseudogene	2	n.396+19773T>C
29	26138709	C	T	GATKstd	intron_variant	MODIFIER	LOC102155786	102155786	transcript	XR_002621149.1	pseudogene	4	n.387+49989G>A
29	26157927	T	C	GATKstd	intron_variant	MODIFIER	LOC111093251	111093251	transcript	XR_002621152.1	pseudogene	1	n.974+3368T>C
29	26157927	T	C	GATKstd	intron_variant	MODIFIER	LOC102155786	102155786	transcript	XR_002621149.1	pseudogene	4	n.387+30771A>G
29	26438805	C	T	GATKstd	intron_variant	MODIFIER	LOC106558028	106558028	transcript	XR_002621145.1	pseudogene	2	n.322+9012C>T
29	26438805	C	T	GATKstd	intron_variant	MODIFIER	LOC111093249	111093249	transcript	XR_002621146.1	pseudogene	1	n.65-261C>T
29	26768588	C	T	GATKstd	intron_variant	MODIFIER	LOC111093176	111093176	transcript	XR_002621001.1	pseudogene	2	n.357-2706C>T
29	26768588	C	T	GATKstd	intron_variant	MODIFIER	LOC102155979	102155979	transcript	XR_002620997.1	pseudogene	5	n.598+1049G>A
29	26768588	C	T	GATKstd	intron_variant	MODIFIER	LOC111093176	111093176	transcript	XR_002621002.1	pseudogene	2	n.215-2706C>T
29	26768588	C	T	GATKstd	intron_variant	MODIFIER	LOC102155979	102155979	transcript	XR_002620998.1	pseudogene	4	n.521+1049G>A
2	6211888	A	G	PASS	intron_variant	MODIFIER	LOC111091106	111091106	transcript	XM_022405927.1	protein_coding	3	c.546+219210T>C
2	8292369	G	A	PASS	downstream_gene_variant	MODIFIER	LOC111091242	111091242	transcript	XR_002616607.1	pseudogene	-1	n.*4646G>A
2	8292369	G	A	PASS	intron_variant	MODIFIER	GPR158	477984	transcript	XM_014121676.2	protein_coding	2	c.1008+42477C>T
2	14233167	A	G	GATKstd	intergenic_region	MODIFIER	LOC111094506-LOC111091118	111094506-111091118	intergenic_region	111094506-111091118		-1	n.14233167A>G
2	18135149	G	A	PASS	intergenic_region	MODIFIER	MPP7-LOC111091399	487080-111091399	intergenic_region	487080-111091399		-1	n.18135149G>A
2	41052486	A	ATCAGG	PASS	intron_variant	MODIFIER	PPP2R2B	478053	transcript	XM_003638915.4	protein_coding	6	c.823+5709_823+5710insCCTGA
2	41052486	A	ATCAGG	PASS	intron_variant	MODIFIER	PPP2R2B	478053	transcript	XM_022409223.1	protein_coding	5	c.571+5709_571+5710insCCTGA
2	41052486	A	ATCAGG	PASS	intron_variant	MODIFIER	PPP2R2B	478053	transcript	XM_022409217.1	protein_coding	5	c.577+5709_577+5710insCCTGA
2	41052486	A	ATCAGG	PASS	intron_variant	MODIFIER	PPP2R2B	478053	transcript	XM_005617357.3	protein_coding	6	c.592+5709_592+5710insCCTGA
2	41052486	A	ATCAGG	PASS	intron_variant	MODIFIER	PPP2R2B	478053	transcript	XM_005617360.3	protein_coding	6	c.625+5709_625+5710insCCTGA
2	41052486	A	ATCAGG	PASS	intron_variant	MODIFIER	PPP2R2B	478053	transcript	XM_022409203.1	protein_coding	6	c.592+5709_592+5710insCCTGA
2	41052486	A	ATCAGG	PASS	intron_variant	MODIFIER	PPP2R2B	478053	transcript	XM_022409211.1	protein_coding	6	c.592+5709_592+5710insCCTGA
2	41052486	A	ATCAGG	PASS	intron_variant	MODIFIER	PPP2R2B	478053	transcript	XM_022409181.1	protein_coding	6	c.751+5709_751+5710insCCTGA
2	41052486	A	ATCAGG	PASS	intron_variant	MODIFIER	PPP2R2B	478053	transcript	XM_005617354.3	protein_coding	5	c.586+5709_586+5710insCCTGA
2	41052486	A	ATCAGG	PASS	intron_variant	MODIFIER	PPP2R2B	478053	transcript	XM_005617353.3	protein_coding	6	c.793+5709_793+5710insCCTGA
2	41052486	A	ATCAGG	PASS	intron_variant	MODIFIER	PPP2R2B	478053	transcript	XM_022409200.1	protein_coding	6	c.592+5709_592+5710insCCTGA
2	41052486	A	ATCAGG	PASS	intron_variant	MODIFIER	PPP2R2B	478053	transcript	XM_003433781.4	protein_coding	5	c.634+5709_634+5710insCCTGA
2	41052486	A	ATCAGG	PASS	intron_variant	MODIFIER	PPP2R2B	478053	transcript	XM_005617355.3	protein_coding	7	c.592+5709_592+5710insCCTGA
2	41052486	A	ATCAGG	PASS	intron_variant	MODIFIER	PPP2R2B	478053	transcript	XM_003433782.4	protein_coding	6	c.643+5709_643+5710insCCTGA
2	41052486	A	ATCAGG	PASS	intron_variant	MODIFIER	PPP2R2B	478053	transcript	XM_003433780.4	protein_coding	7	c.799+5709_799+5710insCCTGA
2	41052486	A	ATCAGG	PASS	intron_variant	MODIFIER	PPP2R2B	478053	transcript	XM_022409183.1	protein_coding	7	c.730+5709_730+5710insCCTGA
2	48953965	C	T	PASS	non_coding_transcript_exon_variant	MODIFIER	LOC102153322	102153322	transcript	XR_002619180.1	pseudogene	1	n.52G>A
2	48953967	CA	C	PASS	non_coding_transcript_exon_variant	MODIFIER	LOC102153322	102153322	transcript	XR_002619180.1	pseudogene	1	n.49delT
2	51296786	TGA	T	PASS	upstream_gene_variant	MODIFIER	PPWD1	478078	transcript	XM_535256.6	protein_coding	-1	c.-3393_-3392delGA
2	51296786	TGA	T	PASS	upstream_gene_variant	MODIFIER	PPWD1	478078	transcript	XM_005617442.3	protein_coding	-1	c.-3670_-3669delGA
2	51296786	TGA	T	PASS	upstream_gene_variant	MODIFIER	PPWD1	478078	transcript	XM_014108731.2	protein_coding	-1	c.-8814_-8813delGA
2	51296786	TGA	T	PASS	intron_variant	MODIFIER	CENPK	609707	transcript	XM_022410063.1	protein_coding	1	c.-77-1446_-77-1445delTC
2	51296786	TGA	T	PASS	intron_variant	MODIFIER	CENPK	609707	transcript	XM_847023.4	protein_coding	1	c.-77-1446_-77-1445delTC
2	51296791	A	C	GATKstd	upstream_gene_variant	MODIFIER	PPWD1	478078	transcript	XM_535256.6	protein_coding	-1	c.-3389A>C
2	51296791	A	C	GATKstd	upstream_gene_variant	MODIFIER	PPWD1	478078	transcript	XM_005617442.3	protein_coding	-1	c.-3666A>C
2	51296791	A	C	GATKstd	upstream_gene_variant	MODIFIER	PPWD1	478078	transcript	XM_014108731.2	protein_coding	-1	c.-8810A>C
2	51296791	A	C	GATKstd	intron_variant	MODIFIER	CENPK	609707	transcript	XM_022410063.1	protein_coding	1	c.-77-1449T>G
2	51296791	A	C	GATKstd	intron_variant	MODIFIER	CENPK	609707	transcript	XM_847023.4	protein_coding	1	c.-77-1449T>G
2	51296796	A	G	GATKstd	upstream_gene_variant	MODIFIER	PPWD1	478078	transcript	XM_535256.6	protein_coding	-1	c.-3384A>G
2	51296796	A	G	GATKstd	upstream_gene_variant	MODIFIER	PPWD1	478078	transcript	XM_005617442.3	protein_coding	-1	c.-3661A>G
2	51296796	A	G	GATKstd	upstream_gene_variant	MODIFIER	PPWD1	478078	transcript	XM_014108731.2	protein_coding	-1	c.-8805A>G
2	51296796	A	G	GATKstd	intron_variant	MODIFIER	CENPK	609707	transcript	XM_022410063.1	protein_coding	1	c.-77-1454T>C
2	51296796	A	G	GATKstd	intron_variant	MODIFIER	CENPK	609707	transcript	XM_847023.4	protein_coding	1	c.-77-1454T>C
2	51296800	A	G	GATKstd	upstream_gene_variant	MODIFIER	PPWD1	478078	transcript	XM_535256.6	protein_coding	-1	c.-3380A>G
2	51296800	A	G	GATKstd	upstream_gene_variant	MODIFIER	PPWD1	478078	transcript	XM_005617442.3	protein_coding	-1	c.-3657A>G
2	51296800	A	G	GATKstd	upstream_gene_variant	MODIFIER	PPWD1	478078	transcript	XM_014108731.2	protein_coding	-1	c.-8801A>G
2	51296800	A	G	GATKstd	intron_variant	MODIFIER	CENPK	609707	transcript	XM_022410063.1	protein_coding	1	c.-77-1458T>C
2	51296800	A	G	GATKstd	intron_variant	MODIFIER	CENPK	609707	transcript	XM_847023.4	protein_coding	1	c.-77-1458T>C
2	62983208	A	C	PASS	intron_variant	MODIFIER	TOX3	487281	transcript	XM_022411368.1	protein_coding	1	c.-22+1309A>C
2	62983208	A	C	PASS	intron_variant	MODIFIER	TOX3	487281	transcript	XM_022411376.1	protein_coding	1	c.-22+1309A>C
30	10563602	T	A	GATKstd	upstream_gene_variant	MODIFIER	MFAP1	478281	transcript	XM_535455.6	protein_coding	-1	c.-4264A>T
30	10563602	T	A	GATKstd	intron_variant	MODIFIER	WDR76	487529	transcript	XM_014109623.2	protein_coding	3	c.510+964T>A
30	10563602	T	A	GATKstd	intron_variant	MODIFIER	WDR76	487529	transcript	XM_022412675.1	protein_coding	2	c.174+964T>A
30	10563602	T	A	GATKstd	intron_variant	MODIFIER	WDR76	487529	transcript	XM_544653.5	protein_coding	2	c.480+964T>A
30	18691642	G	T	PASS	downstream_gene_variant	MODIFIER	LOC102152470	102152470	transcript	XR_296154.2	pseudogene	-1	n.*2953C>A
30	18691642	G	T	PASS	intergenic_region	MODIFIER	LOC102152431-LOC102152470	102152431-102152470	intergenic_region	102152431-102152470		-1	n.18691642G>T
30	18691648	G	GTTTTTTT	PASS	downstream_gene_variant	MODIFIER	LOC102152470	102152470	transcript	XR_296154.2	pseudogene	-1	n.*2946_*2947insAAAAAAA
30	18691648	G	GTTTTTTT	PASS	intergenic_region	MODIFIER	LOC102152431-LOC102152470	102152431-102152470	intergenic_region	102152431-102152470		-1	n.18691648_18691649insTTTTTTT
30	18691650	A	T	PASS	downstream_gene_variant	MODIFIER	LOC102152470	102152470	transcript	XR_296154.2	pseudogene	-1	n.*2945T>A
30	18691650	A	T	PASS	intergenic_region	MODIFIER	LOC102152431-LOC102152470	102152431-102152470	intergenic_region	102152431-102152470		-1	n.18691650A>T
30	39901232	G	GCTTTTTTTTTTTTTTTTTTTTTTTTTTTTTTTTT	PASS	intron_variant	MODIFIER	ETFA	610134	transcript	XM_848294.5	protein_coding	9	c.817-10022_817-10021insCTTTTTTTTTTTTTTTTTTTTTTTTTTTTTTTTT
31	2035595	A	AAAAATAGCCTATAAAAAAAAAAAAAAAAAAAAAAAAAAAAAAAAAAAAAAAAAAAAAAAAAAAAAG	PASS	intron_variant	MODIFIER	CADM2	487680	transcript	XM_005638747.3	protein_coding	5	c.529+9821_529+9822insCTTTTTTTTTTTTTTTTTTTTTTTTTTTTTTTTTTTTTTTTTTTTTTTTTTTTTATAGGCTATTTT
31	2035595	A	AAAAATAGCCTATAAAAAAAAAAAAAAAAAAAAAAAAAAAAAAAAAAAAAAAAAAAAAAAAAAAAAG	PASS	intron_variant	MODIFIER	CADM2	487680	transcript	XM_022413323.1	protein_coding	4	c.178+9821_178+9822insCTTTTTTTTTTTTTTTTTTTTTTTTTTTTTTTTTTTTTTTTTTTTTTTTTTTTTATAGGCTATTTT
31	2035595	A	AAAAATAGCCTATAAAAAAAAAAAAAAAAAAAAAAAAAAAAAAAAAAAAAAAAAAAAAAAAAAAAAG	PASS	intron_variant	MODIFIER	CADM2	487680	transcript	XM_005638748.3	protein_coding	5	c.529+9821_529+9822insCTTTTTTTTTTTTTTTTTTTTTTTTTTTTTTTTTTTTTTTTTTTTTTTTTTTTTATAGGCTATTTT
31	2035595	A	AAAAATAGCCTATAAAAAAAAAAAAAAAAAAAAAAAAAAAAAAAAAAAAAAAAAAAAAAAAAAAAAG	PASS	intron_variant	MODIFIER	CADM2	487680	transcript	XM_544804.6	protein_coding	4	c.502+9821_502+9822insCTTTTTTTTTTTTTTTTTTTTTTTTTTTTTTTTTTTTTTTTTTTTTTTTTTTTTATAGGCTATTTT
31	12417096	C	T	PASS	downstream_gene_variant	MODIFIER	LOC100683656	100683656	transcript	100683656	pseudogene	-1	n.*2499C>T
31	12417096	C	T	PASS	intergenic_region	MODIFIER	LOC100683656-LOC102154762	100683656-102154762	intergenic_region	100683656-102154762		-1	n.12417096C>T
31	12514653	GT	G	PASS	intron_variant	MODIFIER	LOC102154762	102154762	transcript	XR_296222.3	pseudogene	1	n.100-16421delA
31	12550876	A	G	PASS	upstream_gene_variant	MODIFIER	USP25	478387	transcript	XM_535562.6	protein_coding	-1	c.-4831A>G
31	12550876	A	G	PASS	upstream_gene_variant	MODIFIER	USP25	478387	transcript	XM_003433996.4	protein_coding	-1	c.-4831A>G
31	12550876	A	G	PASS	downstream_gene_variant	MODIFIER	LOC111093545	111093545	transcript	XR_002621831.1	pseudogene	-1	n.*2391T>C
31	12550876	A	G	PASS	intron_variant	MODIFIER	LOC102154762	102154762	transcript	XR_296222.3	pseudogene	1	n.99+5053T>C
31	12841354	GTA	G	PASS	intron_variant	MODIFIER	LOC102154980	102154980	transcript	XR_002621553.1	pseudogene	1	n.145-7516_145-7515delTA
31	12869117	T	A	PASS	intron_variant	MODIFIER	LOC102154980	102154980	transcript	XR_002621553.1	pseudogene	2	n.429+19962T>A
31	12966858	A	T	PASS	intron_variant	MODIFIER	LOC102154980	102154980	transcript	XR_002621552.1	pseudogene	1	n.458+7941A>T
31	12966858	A	T	PASS	intron_variant	MODIFIER	LOC102154980	102154980	transcript	XR_002621553.1	pseudogene	3	n.526+22712A>T
31	14021742	G	GGCGCGGAGGTGCCGCGGCCGCCAGCCAGTCGGGAGC	PASS	upstream_gene_variant	MODIFIER	CXADR	403772	transcript	XM_005638767.2	protein_coding	-1	c.-1057_-1056insGCGCGGAGGTGCCGCGGCCGCCAGCCAGTCGGGAGC
31	14021742	G	GGCGCGGAGGTGCCGCGGCCGCCAGCCAGTCGGGAGC	PASS	upstream_gene_variant	MODIFIER	LOC106558102	106558102	transcript	XR_002621796.1	pseudogene	-1	n.-545_-544insGCTCCCGACTGGCTGGCGGCCGCGGCACCTCCGCGC
31	14021742	G	GGCGCGGAGGTGCCGCGGCCGCCAGCCAGTCGGGAGC	PASS	upstream_gene_variant	MODIFIER	CXADR	403772	transcript	XM_005638768.3	protein_coding	-1	c.-1057_-1056insGCGCGGAGGTGCCGCGGCCGCCAGCCAGTCGGGAGC
31	14021742	G	GGCGCGGAGGTGCCGCGGCCGCCAGCCAGTCGGGAGC	PASS	intron_variant	MODIFIER	CXADR	403772	transcript	XM_014109724.2	protein_coding	1	c.-39+347_-39+348insGCGCGGAGGTGCCGCGGCCGCCAGCCAGTCGGGAGC
31	36196387	G	C	GATKstd	downstream_gene_variant	MODIFIER	LOC102154052	102154052	transcript	XR_296268.3	pseudogene	-1	n.*1643C>G
31	36196387	G	C	GATKstd	intron_variant	MODIFIER	RIPK4	487772	transcript	XM_005638997.1	protein_coding	1	c.13-15C>G
31	36313813	C	T	GATKstd	intron_variant	MODIFIER	C2CD2	487774	transcript	XM_544899.3	protein_coding	12	c.1736+65G>A
31	39240752	G	A	GATKstd	intron_variant	MODIFIER	PCBP3	607066	transcript	XM_005639010.3	protein_coding	4	c.11-5269G>A
31	39240752	G	A	GATKstd	intron_variant	MODIFIER	PCBP3	607066	transcript	XM_005639011.3	protein_coding	3	c.11-5269G>A
31	39240752	G	A	GATKstd	intron_variant	MODIFIER	PCBP3	607066	transcript	XM_022413127.1	protein_coding	2	c.11-5269G>A
31	39240752	G	A	GATKstd	intron_variant	MODIFIER	PCBP3	607066	transcript	XM_022413138.1	protein_coding	3	c.11-5269G>A
31	39240752	G	A	GATKstd	intron_variant	MODIFIER	PCBP3	607066	transcript	XM_022413139.1	protein_coding	3	c.11-5269G>A
31	39240752	G	A	GATKstd	intron_variant	MODIFIER	PCBP3	607066	transcript	XM_022413124.1	protein_coding	3	c.11-5269G>A
31	39240752	G	A	GATKstd	intron_variant	MODIFIER	PCBP3	607066	transcript	XM_022413125.1	protein_coding	3	c.11-5269G>A
31	39240752	G	A	GATKstd	intron_variant	MODIFIER	PCBP3	607066	transcript	XM_022413128.1	protein_coding	3	c.11-5269G>A
31	39240752	G	A	GATKstd	intron_variant	MODIFIER	PCBP3	607066	transcript	XM_022413129.1	protein_coding	3	c.11-5269G>A
31	39240752	G	A	GATKstd	intron_variant	MODIFIER	PCBP3	607066	transcript	XM_022413130.1	protein_coding	3	c.11-5269G>A
31	39240752	G	A	GATKstd	intron_variant	MODIFIER	PCBP3	607066	transcript	XM_022413131.1	protein_coding	3	c.11-5269G>A
31	39240752	G	A	GATKstd	intron_variant	MODIFIER	PCBP3	607066	transcript	XM_022413132.1	protein_coding	3	c.11-5269G>A
31	39240752	G	A	GATKstd	intron_variant	MODIFIER	PCBP3	607066	transcript	XM_022413133.1	protein_coding	4	c.-86-5269G>A
31	39240752	G	A	GATKstd	intron_variant	MODIFIER	PCBP3	607066	transcript	XM_022413134.1	protein_coding	3	c.11-5269G>A
31	39240752	G	A	GATKstd	intron_variant	MODIFIER	PCBP3	607066	transcript	XM_022413135.1	protein_coding	3	c.11-5269G>A
31	39240752	G	A	GATKstd	intron_variant	MODIFIER	PCBP3	607066	transcript	XM_022413136.1	protein_coding	3	c.11-5269G>A
31	39240752	G	A	GATKstd	intron_variant	MODIFIER	PCBP3	607066	transcript	XM_022413137.1	protein_coding	3	c.11-5269G>A
31	39240752	G	A	GATKstd	intron_variant	MODIFIER	PCBP3	607066	transcript	XM_022413140.1	protein_coding	3	c.11-5269G>A
31	39240752	G	A	GATKstd	intron_variant	MODIFIER	PCBP3	607066	transcript	XM_022413141.1	protein_coding	3	c.11-5269G>A
31	39240752	G	A	GATKstd	intron_variant	MODIFIER	PCBP3	607066	transcript	XM_005639012.3	protein_coding	2	c.11-5269G>A
31	39251244	G	A	GATKstd	intron_variant	MODIFIER	PCBP3	607066	transcript	XM_005639010.3	protein_coding	10	c.600+1144G>A
31	39251244	G	A	GATKstd	intron_variant	MODIFIER	PCBP3	607066	transcript	XM_005639011.3	protein_coding	9	c.600+1144G>A
31	39251244	G	A	GATKstd	intron_variant	MODIFIER	PCBP3	607066	transcript	XM_022413127.1	protein_coding	8	c.600+1144G>A
31	39251244	G	A	GATKstd	intron_variant	MODIFIER	PCBP3	607066	transcript	XM_022413138.1	protein_coding	9	c.600+1144G>A
31	39251244	G	A	GATKstd	intron_variant	MODIFIER	PCBP3	607066	transcript	XM_022413139.1	protein_coding	9	c.600+1144G>A
31	39251244	G	A	GATKstd	intron_variant	MODIFIER	PCBP3	607066	transcript	XM_022413124.1	protein_coding	9	c.600+1144G>A
31	39251244	G	A	GATKstd	intron_variant	MODIFIER	PCBP3	607066	transcript	XM_022413125.1	protein_coding	9	c.600+1144G>A
31	39251244	G	A	GATKstd	intron_variant	MODIFIER	PCBP3	607066	transcript	XM_022413128.1	protein_coding	9	c.600+1144G>A
31	39251244	G	A	GATKstd	intron_variant	MODIFIER	PCBP3	607066	transcript	XM_022413129.1	protein_coding	9	c.600+1144G>A
31	39251244	G	A	GATKstd	intron_variant	MODIFIER	PCBP3	607066	transcript	XM_022413130.1	protein_coding	9	c.600+1144G>A
31	39251244	G	A	GATKstd	intron_variant	MODIFIER	PCBP3	607066	transcript	XM_022413131.1	protein_coding	9	c.600+1144G>A
31	39251244	G	A	GATKstd	intron_variant	MODIFIER	PCBP3	607066	transcript	XM_022413132.1	protein_coding	9	c.600+1144G>A
31	39251244	G	A	GATKstd	intron_variant	MODIFIER	PCBP3	607066	transcript	XM_022413133.1	protein_coding	10	c.504+1144G>A
31	39251244	G	A	GATKstd	intron_variant	MODIFIER	PCBP3	607066	transcript	XM_022413134.1	protein_coding	9	c.600+1144G>A
31	39251244	G	A	GATKstd	intron_variant	MODIFIER	PCBP3	607066	transcript	XM_022413135.1	protein_coding	9	c.600+1144G>A
31	39251244	G	A	GATKstd	intron_variant	MODIFIER	PCBP3	607066	transcript	XM_022413136.1	protein_coding	9	c.600+1144G>A
31	39251244	G	A	GATKstd	intron_variant	MODIFIER	PCBP3	607066	transcript	XM_022413137.1	protein_coding	9	c.600+1144G>A
31	39251244	G	A	GATKstd	intron_variant	MODIFIER	PCBP3	607066	transcript	XM_022413140.1	protein_coding	8	c.471+2085G>A
31	39251244	G	A	GATKstd	intron_variant	MODIFIER	PCBP3	607066	transcript	XM_022413141.1	protein_coding	8	c.471+2085G>A
31	39251244	G	A	GATKstd	intron_variant	MODIFIER	PCBP3	607066	transcript	XM_005639012.3	protein_coding	8	c.600+1144G>A
31	39257424	G	A	GATKstd	intron_variant	MODIFIER	PCBP3	607066	transcript	XM_005639010.3	protein_coding	12	c.786+302G>A
31	39257424	G	A	GATKstd	intron_variant	MODIFIER	PCBP3	607066	transcript	XM_005639011.3	protein_coding	11	c.786+302G>A
31	39257424	G	A	GATKstd	intron_variant	MODIFIER	PCBP3	607066	transcript	XM_022413127.1	protein_coding	10	c.786+302G>A
31	39257424	G	A	GATKstd	intron_variant	MODIFIER	PCBP3	607066	transcript	XM_022413138.1	protein_coding	11	c.786+302G>A
31	39257424	G	A	GATKstd	intron_variant	MODIFIER	PCBP3	607066	transcript	XM_022413139.1	protein_coding	11	c.786+302G>A
31	39257424	G	A	GATKstd	intron_variant	MODIFIER	PCBP3	607066	transcript	XM_022413124.1	protein_coding	11	c.786+302G>A
31	39257424	G	A	GATKstd	intron_variant	MODIFIER	PCBP3	607066	transcript	XM_022413125.1	protein_coding	11	c.786+302G>A
31	39257424	G	A	GATKstd	intron_variant	MODIFIER	PCBP3	607066	transcript	XM_022413128.1	protein_coding	11	c.786+302G>A
31	39257424	G	A	GATKstd	intron_variant	MODIFIER	PCBP3	607066	transcript	XM_022413129.1	protein_coding	11	c.786+302G>A
31	39257424	G	A	GATKstd	intron_variant	MODIFIER	PCBP3	607066	transcript	XM_022413130.1	protein_coding	11	c.786+302G>A
31	39257424	G	A	GATKstd	intron_variant	MODIFIER	PCBP3	607066	transcript	XM_022413131.1	protein_coding	11	c.717+302G>A
31	39257424	G	A	GATKstd	intron_variant	MODIFIER	PCBP3	607066	transcript	XM_022413132.1	protein_coding	11	c.717+302G>A
31	39257424	G	A	GATKstd	intron_variant	MODIFIER	PCBP3	607066	transcript	XM_022413133.1	protein_coding	12	c.690+302G>A
31	39257424	G	A	GATKstd	intron_variant	MODIFIER	PCBP3	607066	transcript	XM_022413134.1	protein_coding	11	c.717+302G>A
31	39257424	G	A	GATKstd	intron_variant	MODIFIER	PCBP3	607066	transcript	XM_022413135.1	protein_coding	11	c.717+302G>A
31	39257424	G	A	GATKstd	intron_variant	MODIFIER	PCBP3	607066	transcript	XM_022413136.1	protein_coding	10	c.642+302G>A
31	39257424	G	A	GATKstd	intron_variant	MODIFIER	PCBP3	607066	transcript	XM_022413137.1	protein_coding	10	c.642+302G>A
31	39257424	G	A	GATKstd	intron_variant	MODIFIER	PCBP3	607066	transcript	XM_022413140.1	protein_coding	9	c.513+302G>A
31	39257424	G	A	GATKstd	intron_variant	MODIFIER	PCBP3	607066	transcript	XM_022413141.1	protein_coding	9	c.513+302G>A
31	39257424	G	A	GATKstd	intron_variant	MODIFIER	PCBP3	607066	transcript	XM_005639012.3	protein_coding	10	c.786+302G>A
31	39263703	G	A	GATKstd	intron_variant	MODIFIER	PCBP3	607066	transcript	XM_005639010.3	protein_coding	12	c.787-1856G>A
31	39263703	G	A	GATKstd	intron_variant	MODIFIER	PCBP3	607066	transcript	XM_005639011.3	protein_coding	11	c.787-1856G>A
31	39263703	G	A	GATKstd	intron_variant	MODIFIER	PCBP3	607066	transcript	XM_022413127.1	protein_coding	10	c.787-1856G>A
31	39263703	G	A	GATKstd	intron_variant	MODIFIER	PCBP3	607066	transcript	XM_022413138.1	protein_coding	11	c.787-1856G>A
31	39263703	G	A	GATKstd	intron_variant	MODIFIER	PCBP3	607066	transcript	XM_022413139.1	protein_coding	11	c.787-1856G>A
31	39263703	G	A	GATKstd	intron_variant	MODIFIER	PCBP3	607066	transcript	XM_022413124.1	protein_coding	11	c.787-1856G>A
31	39263703	G	A	GATKstd	intron_variant	MODIFIER	PCBP3	607066	transcript	XM_022413125.1	protein_coding	11	c.787-1856G>A
31	39263703	G	A	GATKstd	intron_variant	MODIFIER	PCBP3	607066	transcript	XM_022413128.1	protein_coding	11	c.787-1859G>A
31	39263703	G	A	GATKstd	intron_variant	MODIFIER	PCBP3	607066	transcript	XM_022413129.1	protein_coding	11	c.787-1856G>A
31	39263703	G	A	GATKstd	intron_variant	MODIFIER	PCBP3	607066	transcript	XM_022413130.1	protein_coding	11	c.787-1859G>A
31	39263703	G	A	GATKstd	intron_variant	MODIFIER	PCBP3	607066	transcript	XM_022413131.1	protein_coding	11	c.718-1856G>A
31	39263703	G	A	GATKstd	intron_variant	MODIFIER	PCBP3	607066	transcript	XM_022413132.1	protein_coding	11	c.718-1859G>A
31	39263703	G	A	GATKstd	intron_variant	MODIFIER	PCBP3	607066	transcript	XM_022413133.1	protein_coding	12	c.691-1856G>A
31	39263703	G	A	GATKstd	intron_variant	MODIFIER	PCBP3	607066	transcript	XM_022413134.1	protein_coding	11	c.718-1856G>A
31	39263703	G	A	GATKstd	intron_variant	MODIFIER	PCBP3	607066	transcript	XM_022413135.1	protein_coding	11	c.718-1859G>A
31	39263703	G	A	GATKstd	intron_variant	MODIFIER	PCBP3	607066	transcript	XM_022413136.1	protein_coding	10	c.643-1856G>A
31	39263703	G	A	GATKstd	intron_variant	MODIFIER	PCBP3	607066	transcript	XM_022413137.1	protein_coding	10	c.643-1859G>A
31	39263703	G	A	GATKstd	intron_variant	MODIFIER	PCBP3	607066	transcript	XM_022413140.1	protein_coding	9	c.514-1856G>A
31	39263703	G	A	GATKstd	intron_variant	MODIFIER	PCBP3	607066	transcript	XM_022413141.1	protein_coding	9	c.514-1859G>A
31	39263703	G	A	GATKstd	intron_variant	MODIFIER	PCBP3	607066	transcript	XM_005639012.3	protein_coding	10	c.787-1856G>A
31	39457087	G	A	GATKstd	intron_variant	MODIFIER	FTCD	607685	transcript	XM_022413320.1	protein_coding	7	c.907-515C>T
31	39457087	G	A	GATKstd	intron_variant	MODIFIER	FTCD	607685	transcript	XM_005639019.3	protein_coding	7	c.907-515C>T
31	39457087	G	A	GATKstd	intron_variant	MODIFIER	FTCD	607685	transcript	XM_844452.6	protein_coding	7	c.907-515C>T
31	39737732	G	A	GATKstd	intron_variant	MODIFIER	DIP2A	491614	transcript	XM_548736.4	protein_coding	8	c.1241-281G>A
32	20146744	TAAAAAAAAAAA	T	PASS	intron_variant	MODIFIER	STPG2	487867	transcript	XM_022413470.1	protein_coding	11	c.1430-26737_1430-26727delTTTTTTTTTTT
32	20146744	TAAAAAAAAAAA	T	PASS	intron_variant	MODIFIER	STPG2	487867	transcript	XM_014110065.2	protein_coding	11	c.1430-26737_1430-26727delTTTTTTTTTTT
32	20146744	TAAAAAAAAAAA	T	PASS	intron_variant	MODIFIER	STPG2	487867	transcript	XM_014110066.2	protein_coding	11	c.1430-26737_1430-26727delTTTTTTTTTTT
32	20146744	TAAAAAAAAAAA	T	PASS	intron_variant	MODIFIER	STPG2	487867	transcript	XM_022413471.1	protein_coding	11	c.1430-26737_1430-26727delTTTTTTTTTTT
32	20146744	TAAAAAAAAAAA	T	PASS	intron_variant	MODIFIER	STPG2	487867	transcript	XM_022413473.1	protein_coding	10	c.1292-26737_1292-26727delTTTTTTTTTTT
32	20146744	TAAAAAAAAAAA	T	PASS	intron_variant	MODIFIER	STPG2	487867	transcript	XR_002621954.1	pseudogene	11	n.1446-26737_1446-26727delTTTTTTTTTTT
32	20146744	TAAAAAAAAAAA	T	PASS	intron_variant	MODIFIER	STPG2	487867	transcript	XR_002621955.1	pseudogene	11	n.1446-26737_1446-26727delTTTTTTTTTTT
32	20146744	TAAAAAAAAAAA	T	PASS	intron_variant	MODIFIER	STPG2	487867	transcript	XR_002621951.1	pseudogene	11	n.1446-26737_1446-26727delTTTTTTTTTTT
32	20146744	TAAAAAAAAAAA	T	PASS	intron_variant	MODIFIER	STPG2	487867	transcript	XR_002621960.1	pseudogene	11	n.1446-26737_1446-26727delTTTTTTTTTTT
32	20146744	TAAAAAAAAAAA	T	PASS	intron_variant	MODIFIER	STPG2	487867	transcript	XR_001315084.2	pseudogene	11	n.1446-26737_1446-26727delTTTTTTTTTTT
32	20146744	TAAAAAAAAAAA	T	PASS	intron_variant	MODIFIER	STPG2	487867	transcript	XR_002621949.1	pseudogene	11	n.1446-26737_1446-26727delTTTTTTTTTTT
32	20146744	TAAAAAAAAAAA	T	PASS	intron_variant	MODIFIER	STPG2	487867	transcript	XM_022413475.1	protein_coding	11	c.1430-26737_1430-26727delTTTTTTTTTTT
32	20146744	TAAAAAAAAAAA	T	PASS	intron_variant	MODIFIER	STPG2	487867	transcript	XR_002621952.1	pseudogene	11	n.1446-26737_1446-26727delTTTTTTTTTTT
32	20146744	TAAAAAAAAAAA	T	PASS	intron_variant	MODIFIER	STPG2	487867	transcript	XM_022413476.1	protein_coding	11	c.1430-26737_1430-26727delTTTTTTTTTTT
32	20146744	TAAAAAAAAAAA	T	PASS	intron_variant	MODIFIER	STPG2	487867	transcript	XR_002621958.1	pseudogene	11	n.1446-26737_1446-26727delTTTTTTTTTTT
32	20146744	TAAAAAAAAAAA	T	PASS	intron_variant	MODIFIER	STPG2	487867	transcript	XM_022413477.1	protein_coding	11	c.1430-26737_1430-26727delTTTTTTTTTTT
32	20146744	TAAAAAAAAAAA	T	PASS	intron_variant	MODIFIER	STPG2	487867	transcript	XR_002621953.1	pseudogene	11	n.1446-26737_1446-26727delTTTTTTTTTTT
32	20146744	TAAAAAAAAAAA	T	PASS	intron_variant	MODIFIER	STPG2	487867	transcript	XR_002621957.1	pseudogene	11	n.1446-26737_1446-26727delTTTTTTTTTTT
32	20146744	TAAAAAAAAAAA	T	PASS	intron_variant	MODIFIER	STPG2	487867	transcript	XR_002621950.1	pseudogene	11	n.1446-26737_1446-26727delTTTTTTTTTTT
32	20146744	TAAAAAAAAAAA	T	PASS	intron_variant	MODIFIER	STPG2	487867	transcript	XR_002621956.1	pseudogene	11	n.1446-26737_1446-26727delTTTTTTTTTTT
32	20146744	TAAAAAAAAAAA	T	PASS	intron_variant	MODIFIER	STPG2	487867	transcript	XM_022413480.1	protein_coding	11	c.1430-26737_1430-26727delTTTTTTTTTTT
32	20146744	TAAAAAAAAAAA	T	PASS	intron_variant	MODIFIER	STPG2	487867	transcript	XM_022413474.1	protein_coding	11	c.1430-26737_1430-26727delTTTTTTTTTTT
32	20146744	TAAAAAAAAAAA	T	PASS	intron_variant	MODIFIER	STPG2	487867	transcript	XM_014110067.2	protein_coding	11	c.1430-26737_1430-26727delTTTTTTTTTTT
32	20146744	TAAAAAAAAAAA	T	PASS	intron_variant	MODIFIER	STPG2	487867	transcript	XM_022413478.1	protein_coding	11	c.1430-26737_1430-26727delTTTTTTTTTTT
32	20146744	TAAAAAAAAAAA	T	PASS	intron_variant	MODIFIER	STPG2	487867	transcript	XM_022413479.1	protein_coding	11	c.1430-13129_1430-13119delTTTTTTTTTTT
32	20146744	TAAAAAAAAAAA	T	PASS	intron_variant	MODIFIER	STPG2	487867	transcript	XM_022413482.1	protein_coding	11	c.1430-25044_1430-25034delTTTTTTTTTTT
32	20146744	TAAAAAAAAAAA	T	PASS	intron_variant	MODIFIER	STPG2	487867	transcript	XR_002621959.1	pseudogene	11	n.1446-13129_1446-13119delTTTTTTTTTTT
33	27319448	C	T	GATKstd	intron_variant	MODIFIER	KALRN	478592	transcript	XM_535768.6	protein_coding	5	c.963+888C>T
33	27319448	C	T	GATKstd	intron_variant	MODIFIER	KALRN	478592	transcript	XM_003434080.4	protein_coding	5	c.963+888C>T
33	27319448	C	T	GATKstd	intron_variant	MODIFIER	KALRN	478592	transcript	XM_022414029.1	protein_coding	5	c.963+888C>T
33	27319448	C	T	GATKstd	intron_variant	MODIFIER	KALRN	478592	transcript	XM_022414028.1	protein_coding	5	c.963+888C>T
33	27319448	C	T	GATKstd	intron_variant	MODIFIER	KALRN	478592	transcript	XM_022414030.1	protein_coding	5	c.963+888C>T
33	27319448	C	T	GATKstd	intron_variant	MODIFIER	KALRN	478592	transcript	XM_005639577.3	protein_coding	5	c.963+888C>T
33	27319448	C	T	GATKstd	intron_variant	MODIFIER	KALRN	478592	transcript	XM_005639578.3	protein_coding	5	c.963+888C>T
33	27319448	C	T	GATKstd	intron_variant	MODIFIER	KALRN	478592	transcript	XM_005639576.3	protein_coding	5	c.963+888C>T
33	27319448	C	T	GATKstd	intron_variant	MODIFIER	KALRN	478592	transcript	XM_005639579.3	protein_coding	5	c.963+888C>T
33	27319448	C	T	GATKstd	intron_variant	MODIFIER	KALRN	478592	transcript	XM_005639580.3	protein_coding	5	c.963+888C>T
33	27319448	C	T	GATKstd	intron_variant	MODIFIER	KALRN	478592	transcript	XM_022414020.1	protein_coding	5	c.963+888C>T
33	27319448	C	T	GATKstd	intron_variant	MODIFIER	KALRN	478592	transcript	XM_022414021.1	protein_coding	5	c.963+888C>T
33	27319448	C	T	GATKstd	intron_variant	MODIFIER	KALRN	478592	transcript	XM_022414031.1	protein_coding	5	c.963+888C>T
33	27319448	C	T	GATKstd	intron_variant	MODIFIER	KALRN	478592	transcript	XM_005639583.3	protein_coding	5	c.963+888C>T
33	27319448	C	T	GATKstd	intron_variant	MODIFIER	KALRN	478592	transcript	XM_022414022.1	protein_coding	5	c.963+888C>T
33	27319448	C	T	GATKstd	intron_variant	MODIFIER	KALRN	478592	transcript	XM_022414023.1	protein_coding	5	c.963+888C>T
33	27319448	C	T	GATKstd	intron_variant	MODIFIER	KALRN	478592	transcript	XM_005639581.3	protein_coding	5	c.963+888C>T
33	27319448	C	T	GATKstd	intron_variant	MODIFIER	KALRN	478592	transcript	XM_022414024.1	protein_coding	5	c.963+888C>T
33	27319448	C	T	GATKstd	intron_variant	MODIFIER	KALRN	478592	transcript	XM_022414025.1	protein_coding	5	c.963+888C>T
33	27319448	C	T	GATKstd	intron_variant	MODIFIER	KALRN	478592	transcript	XM_022414026.1	protein_coding	5	c.963+888C>T
33	27319448	C	T	GATKstd	intron_variant	MODIFIER	KALRN	478592	transcript	XM_022414027.1	protein_coding	5	c.963+888C>T
33	27319448	C	T	GATKstd	intron_variant	MODIFIER	KALRN	478592	transcript	XM_014110186.2	protein_coding	5	c.963+888C>T
33	27339200	A	G	PASS	intron_variant	MODIFIER	KALRN	478592	transcript	XM_535768.6	protein_coding	5	c.964-6286A>G
33	27339200	A	G	PASS	intron_variant	MODIFIER	KALRN	478592	transcript	XM_003434080.4	protein_coding	5	c.964-6286A>G
33	27339200	A	G	PASS	intron_variant	MODIFIER	KALRN	478592	transcript	XM_022414029.1	protein_coding	5	c.964-6286A>G
33	27339200	A	G	PASS	intron_variant	MODIFIER	KALRN	478592	transcript	XM_022414028.1	protein_coding	5	c.964-6286A>G
33	27339200	A	G	PASS	intron_variant	MODIFIER	KALRN	478592	transcript	XM_022414030.1	protein_coding	5	c.964-6286A>G
33	27339200	A	G	PASS	intron_variant	MODIFIER	KALRN	478592	transcript	XM_005639577.3	protein_coding	5	c.964-6286A>G
33	27339200	A	G	PASS	intron_variant	MODIFIER	KALRN	478592	transcript	XM_005639578.3	protein_coding	5	c.964-6286A>G
33	27339200	A	G	PASS	intron_variant	MODIFIER	KALRN	478592	transcript	XM_005639576.3	protein_coding	5	c.964-6286A>G
33	27339200	A	G	PASS	intron_variant	MODIFIER	KALRN	478592	transcript	XM_005639579.3	protein_coding	5	c.964-6286A>G
33	27339200	A	G	PASS	intron_variant	MODIFIER	KALRN	478592	transcript	XM_005639580.3	protein_coding	5	c.964-6286A>G
33	27339200	A	G	PASS	intron_variant	MODIFIER	KALRN	478592	transcript	XM_022414020.1	protein_coding	5	c.964-6286A>G
33	27339200	A	G	PASS	intron_variant	MODIFIER	KALRN	478592	transcript	XM_022414021.1	protein_coding	5	c.964-6286A>G
33	27339200	A	G	PASS	intron_variant	MODIFIER	KALRN	478592	transcript	XM_022414031.1	protein_coding	5	c.964-6286A>G
33	27339200	A	G	PASS	intron_variant	MODIFIER	KALRN	478592	transcript	XM_005639583.3	protein_coding	5	c.964-6286A>G
33	27339200	A	G	PASS	intron_variant	MODIFIER	KALRN	478592	transcript	XM_022414022.1	protein_coding	5	c.964-6286A>G
33	27339200	A	G	PASS	intron_variant	MODIFIER	KALRN	478592	transcript	XM_022414023.1	protein_coding	5	c.964-6286A>G
33	27339200	A	G	PASS	intron_variant	MODIFIER	KALRN	478592	transcript	XM_005639581.3	protein_coding	5	c.964-6286A>G
33	27339200	A	G	PASS	intron_variant	MODIFIER	KALRN	478592	transcript	XM_022414024.1	protein_coding	5	c.964-6286A>G
33	27339200	A	G	PASS	intron_variant	MODIFIER	KALRN	478592	transcript	XM_022414025.1	protein_coding	5	c.964-6286A>G
33	27339200	A	G	PASS	intron_variant	MODIFIER	KALRN	478592	transcript	XM_022414026.1	protein_coding	5	c.964-6286A>G
33	27339200	A	G	PASS	intron_variant	MODIFIER	KALRN	478592	transcript	XM_022414027.1	protein_coding	5	c.964-6286A>G
33	27339200	A	G	PASS	intron_variant	MODIFIER	KALRN	478592	transcript	XM_014110186.2	protein_coding	5	c.964-6286A>G
33	27371879	T	G	GATKstd	intron_variant	MODIFIER	KALRN	478592	transcript	XM_535768.6	protein_coding	7	c.1279-1705T>G
33	27371879	T	G	GATKstd	intron_variant	MODIFIER	KALRN	478592	transcript	XM_003434080.4	protein_coding	7	c.1279-1705T>G
33	27371879	T	G	GATKstd	intron_variant	MODIFIER	KALRN	478592	transcript	XM_022414029.1	protein_coding	7	c.1279-1705T>G
33	27371879	T	G	GATKstd	intron_variant	MODIFIER	KALRN	478592	transcript	XM_022414028.1	protein_coding	7	c.1279-1705T>G
33	27371879	T	G	GATKstd	intron_variant	MODIFIER	KALRN	478592	transcript	XM_022414030.1	protein_coding	7	c.1279-1705T>G
33	27371879	T	G	GATKstd	intron_variant	MODIFIER	KALRN	478592	transcript	XM_005639577.3	protein_coding	7	c.1279-1705T>G
33	27371879	T	G	GATKstd	intron_variant	MODIFIER	KALRN	478592	transcript	XM_005639578.3	protein_coding	7	c.1279-1705T>G
33	27371879	T	G	GATKstd	intron_variant	MODIFIER	KALRN	478592	transcript	XM_005639576.3	protein_coding	7	c.1279-1705T>G
33	27371879	T	G	GATKstd	intron_variant	MODIFIER	KALRN	478592	transcript	XM_005639579.3	protein_coding	7	c.1279-1705T>G
33	27371879	T	G	GATKstd	intron_variant	MODIFIER	KALRN	478592	transcript	XM_005639580.3	protein_coding	7	c.1279-1705T>G
33	27371879	T	G	GATKstd	intron_variant	MODIFIER	KALRN	478592	transcript	XM_022414020.1	protein_coding	7	c.1279-1705T>G
33	27371879	T	G	GATKstd	intron_variant	MODIFIER	KALRN	478592	transcript	XM_022414021.1	protein_coding	7	c.1279-1705T>G
33	27371879	T	G	GATKstd	intron_variant	MODIFIER	KALRN	478592	transcript	XM_022414031.1	protein_coding	7	c.1279-1705T>G
33	27371879	T	G	GATKstd	intron_variant	MODIFIER	KALRN	478592	transcript	XM_005639583.3	protein_coding	7	c.1279-1705T>G
33	27371879	T	G	GATKstd	intron_variant	MODIFIER	KALRN	478592	transcript	XM_022414022.1	protein_coding	7	c.1279-1705T>G
33	27371879	T	G	GATKstd	intron_variant	MODIFIER	KALRN	478592	transcript	XM_022414023.1	protein_coding	7	c.1279-1705T>G
33	27371879	T	G	GATKstd	intron_variant	MODIFIER	KALRN	478592	transcript	XM_005639581.3	protein_coding	7	c.1279-1705T>G
33	27371879	T	G	GATKstd	intron_variant	MODIFIER	KALRN	478592	transcript	XM_022414024.1	protein_coding	7	c.1279-1705T>G
33	27371879	T	G	GATKstd	intron_variant	MODIFIER	KALRN	478592	transcript	XM_022414025.1	protein_coding	7	c.1279-1705T>G
33	27371879	T	G	GATKstd	intron_variant	MODIFIER	KALRN	478592	transcript	XM_022414026.1	protein_coding	7	c.1279-1705T>G
33	27371879	T	G	GATKstd	intron_variant	MODIFIER	KALRN	478592	transcript	XM_022414027.1	protein_coding	7	c.1279-1705T>G
33	27371879	T	G	GATKstd	intron_variant	MODIFIER	KALRN	478592	transcript	XM_014110186.2	protein_coding	7	c.1279-1705T>G
33	27794749	A	T	GATKstd	upstream_gene_variant	MODIFIER	LOC106558170	106558170	transcript	XR_001315109.2	pseudogene	-1	n.-44T>A
33	27794749	A	T	GATKstd	downstream_gene_variant	MODIFIER	ITGB5	608977	transcript	XM_846152.4	protein_coding	-1	c.*2926T>A
33	27794749	A	T	GATKstd	intergenic_region	MODIFIER	LOC106558170-ITGB5	106558170-608977	intergenic_region	106558170-608977		-1	n.27794749A>T
33	27950862	C	G	GATKstd	intron_variant	MODIFIER	MUC13	478594	transcript	XM_022413890.1	protein_coding	1	c.46+614G>C
34	31976401	C	G	GATKstd	intergenic_region	MODIFIER	LOC111093853-ZBBX	111093853-100855956	intergenic_region	111093853-100855956		-1	n.31976401C>G
34	31976408	C	T	GATKstd	intergenic_region	MODIFIER	LOC111093853-ZBBX	111093853-100855956	intergenic_region	111093853-100855956		-1	n.31976408C>T
34	34628486	G	C	GATKstd	intergenic_region	MODIFIER	LOC111093877-PHC3	111093877-488158	intergenic_region	111093877-488158		-1	n.34628486G>C
34	40436534	C	A	GATKstd	intergenic_region	MODIFIER	LOC102156429-LOC111093867	102156429-111093867	intergenic_region	102156429-111093867		-1	n.40436534C>A
34	40545832	C	T	GATKstd	intergenic_region	MODIFIER	LOC111093930-TBL1XR1	111093930-488176	intergenic_region	111093930-488176		-1	n.40545832C>T
35	5922435	G	A	GATKstd	intergenic_region	MODIFIER	FARS2-NRN1	488204-612757	intergenic_region	488204-612757		-1	n.5922435G>A
36	16057356	G	T	GATKstd	intron_variant	MODIFIER	LOC111094279	111094279	transcript	XR_002623282.1	pseudogene	1	n.2132-1177C>A
36	16057356	G	T	GATKstd	intron_variant	MODIFIER	LOC111094279	111094279	transcript	XR_002623281.1	pseudogene	2	n.1830-1177C>A
36	16057356	G	T	GATKstd	intron_variant	MODIFIER	LOC111094279	111094279	transcript	XR_002623279.1	pseudogene	1	n.2132-1177C>A
36	16057356	G	T	GATKstd	intron_variant	MODIFIER	LOC111094279	111094279	transcript	XR_002623280.1	pseudogene	2	n.1696-1177C>A
36	21274363	A	T	GATKstd	upstream_gene_variant	MODIFIER	TTC30B	610209	transcript	XM_847647.4	protein_coding	-1	c.-766T>A
36	21274363	A	T	GATKstd	intron_variant	MODIFIER	LOC106558294	106558294	transcript	XR_002623158.1	pseudogene	1	n.133+274A>T
36	30258646	C	T	PASS	intron_variant	MODIFIER	LOC102156907	102156907	transcript	XR_296696.3	pseudogene	2	n.289+4518G>A
37	869656	T	C	GATKstd	intron_variant	MODIFIER	HIBCH	607040	transcript	XM_005640454.2	protein_coding	8	c.652-1233A>G
37	869656	T	C	GATKstd	intron_variant	MODIFIER	HIBCH	607040	transcript	XM_022414967.1	protein_coding	8	c.583-1233A>G
37	869656	T	C	GATKstd	intron_variant	MODIFIER	HIBCH	607040	transcript	XM_022414968.1	protein_coding	9	c.583-1233A>G
37	2016694	A	T	GATKstd	intergenic_region	MODIFIER	MYO1B-LOC111094431	478846-111094431	intergenic_region	478846-111094431		-1	n.2016694A>T
38	1517296	G	A	GATKstd	intron_variant	MODIFIER	NFASC	488565	transcript	XM_005640773.3	protein_coding	26	c.3139+438G>A
38	1517296	G	A	GATKstd	intron_variant	MODIFIER	LOC111094590	111094590	transcript	XR_002624011.1	pseudogene	1	n.921-483C>T
38	1517296	G	A	GATKstd	intron_variant	MODIFIER	NFASC	488565	transcript	XM_022415411.1	protein_coding	26	c.3139+438G>A
38	1517296	G	A	GATKstd	intron_variant	MODIFIER	NFASC	488565	transcript	XM_005640774.3	protein_coding	25	c.3121+438G>A
38	1517296	G	A	GATKstd	intron_variant	MODIFIER	NFASC	488565	transcript	XM_005640775.3	protein_coding	25	c.3094+438G>A
38	1517296	G	A	GATKstd	intron_variant	MODIFIER	NFASC	488565	transcript	XM_005640776.3	protein_coding	25	c.3088+438G>A
38	1517296	G	A	GATKstd	intron_variant	MODIFIER	NFASC	488565	transcript	XM_003434326.4	protein_coding	24	c.3076+438G>A
38	1517296	G	A	GATKstd	intron_variant	MODIFIER	NFASC	488565	transcript	XM_005640777.3	protein_coding	26	c.3139+438G>A
38	1517296	G	A	GATKstd	intron_variant	MODIFIER	NFASC	488565	transcript	XM_005640778.3	protein_coding	26	c.3139+438G>A
38	1517296	G	A	GATKstd	intron_variant	MODIFIER	NFASC	488565	transcript	XM_005640779.3	protein_coding	24	c.2818+438G>A
38	1517296	G	A	GATKstd	intron_variant	MODIFIER	NFASC	488565	transcript	XM_005640780.3	protein_coding	26	c.3139+438G>A
38	1517296	G	A	GATKstd	intron_variant	MODIFIER	NFASC	488565	transcript	XM_005640781.3	protein_coding	26	c.3139+438G>A
38	1517296	G	A	GATKstd	intron_variant	MODIFIER	NFASC	488565	transcript	XM_005640782.3	protein_coding	23	c.3025+438G>A
38	1517296	G	A	GATKstd	intron_variant	MODIFIER	NFASC	488565	transcript	XM_014111177.2	protein_coding	24	c.3070+438G>A
38	1517296	G	A	GATKstd	intron_variant	MODIFIER	NFASC	488565	transcript	XM_022415412.1	protein_coding	24	c.2818+438G>A
38	1517296	G	A	GATKstd	intron_variant	MODIFIER	NFASC	488565	transcript	XM_022415413.1	protein_coding	23	c.2767+438G>A
38	1517296	G	A	GATKstd	intron_variant	MODIFIER	NFASC	488565	transcript	XM_545682.6	protein_coding	25	c.3121+438G>A
38	1517296	G	A	GATKstd	intron_variant	MODIFIER	NFASC	488565	transcript	XM_850983.5	protein_coding	24	c.3076+438G>A
38	1517296	G	A	GATKstd	intron_variant	MODIFIER	NFASC	488565	transcript	XM_851151.5	protein_coding	23	c.2767+438G>A
38	1517296	G	A	GATKstd	intron_variant	MODIFIER	NFASC	488565	transcript	XM_005640783.3	protein_coding	26	c.3139+438G>A
38	1517296	G	A	GATKstd	intron_variant	MODIFIER	NFASC	488565	transcript	XM_022415410.1	protein_coding	25	c.3139+438G>A
38	1617431	G	A	PASS	intron_variant	MODIFIER	RBBP5	488568	transcript	XM_843459.5	protein_coding	10	c.1096+497C>T
38	1617431	G	A	PASS	intron_variant	MODIFIER	RBBP5	488568	transcript	XM_014111259.2	protein_coding	8	c.715+497C>T
38	1617431	G	A	PASS	intron_variant	MODIFIER	RBBP5	488568	transcript	XM_005640785.3	protein_coding	10	c.1096+497C>T
38	1645258	A	G	GATKstd	upstream_gene_variant	MODIFIER	LOC102156359	102156359	transcript	XR_002623810.1	pseudogene	-1	n.-1356A>G
38	1645258	A	G	GATKstd	upstream_gene_variant	MODIFIER	LOC102156359	102156359	transcript	XR_002623811.1	pseudogene	-1	n.-1356A>G
38	1645258	A	G	GATKstd	upstream_gene_variant	MODIFIER	LOC102156359	102156359	transcript	XR_002623809.1	pseudogene	-1	n.-1357A>G
38	1645258	A	G	GATKstd	intron_variant	MODIFIER	RBBP5	488568	transcript	XM_843459.5	protein_coding	1	c.19+818T>C
38	1645258	A	G	GATKstd	intron_variant	MODIFIER	RBBP5	488568	transcript	XM_014111259.2	protein_coding	1	c.-164+818T>C
38	1645258	A	G	GATKstd	intron_variant	MODIFIER	RBBP5	488568	transcript	XM_005640785.3	protein_coding	1	c.19+818T>C
38	2119217	A	T	GATKstd	intron_variant	MODIFIER	SLC45A3	488575	transcript	XM_005640792.3	protein_coding	2	c.-227-2127T>A
38	2119217	A	T	GATKstd	intron_variant	MODIFIER	SLC45A3	488575	transcript	XM_022415303.1	protein_coding	2	c.-227-2127T>A
38	2119217	A	T	GATKstd	intron_variant	MODIFIER	SLC45A3	488575	transcript	XR_002623788.1	pseudogene	2	n.1761-2127T>A
38	2119217	A	T	GATKstd	intron_variant	MODIFIER	SLC45A3	488575	transcript	XM_005640795.3	protein_coding	1	c.-227-2127T>A
38	2119217	A	T	GATKstd	intron_variant	MODIFIER	SLC45A3	488575	transcript	XM_005640794.3	protein_coding	1	c.-227-2127T>A
38	2119217	A	T	GATKstd	intron_variant	MODIFIER	SLC45A3	488575	transcript	XM_022415302.1	protein_coding	3	c.-227-2127T>A
38	2188707	G	C	GATKstd	upstream_gene_variant	MODIFIER	NUCKS1	478944	transcript	XM_005640796.3	protein_coding	-1	c.-396C>G
38	2188707	G	C	GATKstd	upstream_gene_variant	MODIFIER	NUCKS1	478944	transcript	XM_022415448.1	protein_coding	-1	c.-396C>G
38	2188707	G	C	GATKstd	intergenic_region	MODIFIER	NUCKS1-RAB29	478944-478945	intergenic_region	478944-478945		-1	n.2188707G>C
38	3228968	G	A	GATKstd	intron_variant	MODIFIER	KCNT2	607500	transcript	XM_844191.4	protein_coding	13	c.1295-11784G>A
38	3476084	C	T	GATKstd	intergenic_region	MODIFIER	KCNT2-LOC111094553	607500-111094553	intergenic_region	607500-111094553		-1	n.3476084C>T
38	11898740	G	A	PASS	intron_variant	MODIFIER	ESRRG	478961	transcript	XM_022415393.1	protein_coding	3	c.590-11827C>T
38	11898740	G	A	PASS	intron_variant	MODIFIER	ESRRG	478961	transcript	XM_022415394.1	protein_coding	3	c.539-11827C>T
38	11898740	G	A	PASS	intron_variant	MODIFIER	ESRRG	478961	transcript	XM_022415398.1	protein_coding	6	c.521-11827C>T
38	11898740	G	A	PASS	intron_variant	MODIFIER	ESRRG	478961	transcript	XM_022415399.1	protein_coding	5	c.521-11827C>T
38	11898740	G	A	PASS	intron_variant	MODIFIER	ESRRG	478961	transcript	XM_022415404.1	protein_coding	5	c.521-11827C>T
38	11898740	G	A	PASS	intron_variant	MODIFIER	ESRRG	478961	transcript	XM_022415407.1	protein_coding	5	c.521-11827C>T
38	11898740	G	A	PASS	intron_variant	MODIFIER	ESRRG	478961	transcript	XM_022415403.1	protein_coding	6	c.521-11827C>T
38	11898740	G	A	PASS	intron_variant	MODIFIER	ESRRG	478961	transcript	XM_022415402.1	protein_coding	6	c.521-11827C>T
38	11898740	G	A	PASS	intron_variant	MODIFIER	ESRRG	478961	transcript	XM_022415405.1	protein_coding	5	c.521-11827C>T
38	11898740	G	A	PASS	intron_variant	MODIFIER	ESRRG	478961	transcript	XM_022415400.1	protein_coding	5	c.521-11827C>T
38	11898740	G	A	PASS	intron_variant	MODIFIER	ESRRG	478961	transcript	XM_022415408.1	protein_coding	3	c.521-11827C>T
38	11898740	G	A	PASS	intron_variant	MODIFIER	ESRRG	478961	transcript	XM_022415401.1	protein_coding	6	c.521-11827C>T
38	11898740	G	A	PASS	intron_variant	MODIFIER	ESRRG	478961	transcript	XM_022415395.1	protein_coding	6	c.521-11827C>T
38	11898740	G	A	PASS	intron_variant	MODIFIER	ESRRG	478961	transcript	XM_022415396.1	protein_coding	7	c.521-11827C>T
38	11898740	G	A	PASS	intron_variant	MODIFIER	ESRRG	478961	transcript	XM_022415397.1	protein_coding	5	c.521-11827C>T
38	11898740	G	A	PASS	intron_variant	MODIFIER	ESRRG	478961	transcript	XM_022415406.1	protein_coding	5	c.521-11827C>T
38	11898740	G	A	PASS	intron_variant	MODIFIER	ESRRG	478961	transcript	XM_844183.5	protein_coding	3	c.590-11827C>T
38	12327325	T	C	PASS	intron_variant	MODIFIER	ESRRG	478961	transcript	XM_022415398.1	protein_coding	1	c.-280+24851A>G
38	12327325	T	C	PASS	intron_variant	MODIFIER	ESRRG	478961	transcript	XM_022415399.1	protein_coding	1	c.-189+24851A>G
38	12327325	T	C	PASS	intron_variant	MODIFIER	ESRRG	478961	transcript	XM_022415404.1	protein_coding	1	c.-189+24876A>G
38	12327325	T	C	PASS	intron_variant	MODIFIER	ESRRG	478961	transcript	XM_022415407.1	protein_coding	1	c.-197+24851A>G
38	12327325	T	C	PASS	intron_variant	MODIFIER	ESRRG	478961	transcript	XM_022415403.1	protein_coding	2	c.-189+38858A>G
38	12327325	T	C	PASS	intron_variant	MODIFIER	ESRRG	478961	transcript	XM_022415402.1	protein_coding	2	c.-189+38858A>G
38	12327325	T	C	PASS	intron_variant	MODIFIER	ESRRG	478961	transcript	XM_022415405.1	protein_coding	1	c.-189+55414A>G
38	12327325	T	C	PASS	intron_variant	MODIFIER	ESRRG	478961	transcript	XM_022415400.1	protein_coding	1	c.-189+66177A>G
38	12327325	T	C	PASS	intron_variant	MODIFIER	ESRRG	478961	transcript	XM_022415408.1	protein_coding	1	c.-14+66177A>G
38	12327325	T	C	PASS	intron_variant	MODIFIER	ESRRG	478961	transcript	XM_022415401.1	protein_coding	2	c.-189+38858A>G
38	12327325	T	C	PASS	intron_variant	MODIFIER	ESRRG	478961	transcript	XM_022415395.1	protein_coding	2	c.-189+67290A>G
38	12327325	T	C	PASS	intron_variant	MODIFIER	ESRRG	478961	transcript	XM_022415396.1	protein_coding	3	c.-189+38858A>G
38	12327325	T	C	PASS	intron_variant	MODIFIER	ESRRG	478961	transcript	XM_022415397.1	protein_coding	1	c.-188-71297A>G
38	12327325	T	C	PASS	intron_variant	MODIFIER	ESRRG	478961	transcript	XM_022415406.1	protein_coding	2	c.-106+67290A>G
3	540090	C	CT	PASS	intron_variant	MODIFIER	EPB41L4A	479140	transcript	XM_005618035.2	protein_coding	1	c.45+32515_45+32516insT
3	31548908	G	A	GATKstd	downstream_gene_variant	MODIFIER	COR6C40	488678	transcript	NM_001256450.1	protein_coding	-1	c.*1896G>A
3	31548908	G	A	GATKstd	downstream_gene_variant	MODIFIER	COR6C40	488678	transcript	XM_005618031.3	protein_coding	-1	c.*1896G>A
3	31548908	G	A	GATKstd	downstream_gene_variant	MODIFIER	COR6C40	488678	transcript	XM_005618032.1	protein_coding	-1	c.*1896G>A
3	31548908	G	A	GATKstd	intergenic_region	MODIFIER	COR6C40-LOC100683660	488678-100683660	intergenic_region	488678-100683660		-1	n.31548908G>A
3	79475118	T	C	GATKstd	intergenic_region	MODIFIER	LOC111095396-LOC111095397	111095396-111095397	intergenic_region	111095396-111095397		-1	n.79475118T>C
3	79753616	T	G	GATKstd	intergenic_region	MODIFIER	LOC111095396-LOC111095397	111095396-111095397	intergenic_region	111095396-111095397		-1	n.79753616T>G
3	79757359	GAGAA	G	PASS	intergenic_region	MODIFIER	LOC111095396-LOC111095397	111095396-111095397	intergenic_region	111095396-111095397		-1	n.79757360_79757363delAGAA
3	79791841	A	AG	PASS	intron_variant	MODIFIER	LOC111095397	111095397	transcript	XR_002625493.1	pseudogene	2	n.245-384_245-383insC
3	79791841	A	AG	PASS	intron_variant	MODIFIER	LOC111095397	111095397	transcript	XR_002625492.1	pseudogene	1	n.158-384_158-383insC
3	79815440	G	A	GATKstd	intron_variant	MODIFIER	LOC111095397	111095397	transcript	XR_002625493.1	pseudogene	1	n.157+14683C>T
3	79815440	G	A	GATKstd	intron_variant	MODIFIER	LOC111095397	111095397	transcript	XR_002625492.1	pseudogene	1	n.157+14683C>T
3	79879068	CT	C	PASS	intergenic_region	MODIFIER	LOC111095397-PCDH7	111095397-488843	intergenic_region	111095397-488843		-1	n.79879069delT
3	79879070	CTCTCTCT	C	PASS	intergenic_region	MODIFIER	LOC111095397-PCDH7	111095397-488843	intergenic_region	111095397-488843		-1	n.79879071_79879077delTCTCTCT
3	79958498	A	C	GATKstd	intergenic_region	MODIFIER	LOC111095397-PCDH7	111095397-488843	intergenic_region	111095397-488843		-1	n.79958498A>C
3	80012398	G	A	GATKstd	intron_variant	MODIFIER	PCDH7	488843	transcript	XM_022417259.1	protein_coding	4	c.3407-35481C>T
3	80014250	C	T	GATKstd	intron_variant	MODIFIER	PCDH7	488843	transcript	XM_022417259.1	protein_coding	4	c.3407-37333G>A
3	80061134	A	G	GATKstd	intron_variant	MODIFIER	PCDH7	488843	transcript	XM_022417259.1	protein_coding	4	c.3406+67248T>C
3	80246966	A	T	GATKstd	intron_variant	MODIFIER	PCDH7	488843	transcript	XM_022417259.1	protein_coding	2	c.3271-51394T>A
4	206213	G	A	PASS	intron_variant	MODIFIER	LOC606894	606894	transcript	XM_022417374.1	protein_coding	2	c.16-237G>A
4	206213	G	A	PASS	intron_variant	MODIFIER	LOC606894	606894	transcript	XR_002625531.1	pseudogene	2	n.452-624G>A
4	206213	G	A	PASS	intron_variant	MODIFIER	LOC606894	606894	transcript	XM_022417375.1	protein_coding	2	c.16-237G>A
4	206213	G	A	PASS	intron_variant	MODIFIER	LOC606894	606894	transcript	XR_002625532.1	pseudogene	2	n.452-624G>A
4	206213	G	A	PASS	intron_variant	MODIFIER	LOC606894	606894	transcript	XM_022417376.1	protein_coding	2	c.16-237G>A
4	206213	G	A	PASS	intron_variant	MODIFIER	LOC606894	606894	transcript	XR_002625530.1	pseudogene	2	n.452-624G>A
4	265616	C	T	GATKstd	missense_variant	MODERATE	ZNF25	479185	transcript	XM_005618772.3	protein_coding	5	c.287G>A	p.Arg96Gln
4	265616	C	T	GATKstd	missense_variant	MODERATE	ZNF25	479185	transcript	XM_014112717.2	protein_coding	4	c.179G>A	p.Arg60Gln
4	265616	C	T	GATKstd	missense_variant	MODERATE	ZNF25	479185	transcript	XM_022417372.1	protein_coding	5	c.287G>A	p.Arg96Gln
4	265616	C	T	GATKstd	missense_variant	MODERATE	ZNF25	479185	transcript	XM_005618773.3	protein_coding	5	c.287G>A	p.Arg96Gln
4	265616	C	T	GATKstd	missense_variant	MODERATE	ZNF25	479185	transcript	XM_536326.7	protein_coding	4	c.179G>A	p.Arg60Gln
4	334166	G	T	PASS	missense_variant	MODERATE	LOC111095417	111095417	transcript	XM_022417371.1	protein_coding	1	c.81G>T	p.Met27Ile
4	334166	G	T	PASS	intron_variant	MODIFIER	LOC606925	606925	transcript	XM_022417354.1	protein_coding	4	c.238+20687G>T
4	355429	A	G	PASS	downstream_gene_variant	MODIFIER	LOC100686105	100686105	transcript	100686105	pseudogene	-1	n.*1217T>C
4	355429	A	G	PASS	intron_variant	MODIFIER	LOC606925	606925	transcript	XM_022417354.1	protein_coding	4	c.239-8592A>G
4	519330	C	T	PASS	intron_variant	MODIFIER	CHRM3	403827	transcript	XM_546069.6	protein_coding	1	c.14+1270G>A
4	519330	C	T	PASS	intron_variant	MODIFIER	CHRM3	403827	transcript	XM_022417364.1	protein_coding	1	c.-19-10549G>A
4	519330	C	T	PASS	intron_variant	MODIFIER	CHRM3	403827	transcript	XM_022417363.1	protein_coding	4	c.-19-10549G>A
4	519330	C	T	PASS	intron_variant	MODIFIER	CHRM3	403827	transcript	XM_005618760.2	protein_coding	4	c.-19-10549G>A
4	519330	C	T	PASS	intron_variant	MODIFIER	CHRM3	403827	transcript	XM_005618761.2	protein_coding	4	c.-19-10549G>A
4	519330	C	T	PASS	intron_variant	MODIFIER	CHRM3	403827	transcript	XM_005618763.2	protein_coding	3	c.-19-10549G>A
4	519330	C	T	PASS	intron_variant	MODIFIER	CHRM3	403827	transcript	XM_005618766.2	protein_coding	5	c.-19-10549G>A
4	519330	C	T	PASS	intron_variant	MODIFIER	CHRM3	403827	transcript	XM_005618768.2	protein_coding	5	c.-19-10549G>A
4	519330	C	T	PASS	intron_variant	MODIFIER	CHRM3	403827	transcript	XM_005618769.2	protein_coding	5	c.-19-10549G>A
4	519330	C	T	PASS	intron_variant	MODIFIER	CHRM3	403827	transcript	XM_014112712.2	protein_coding	3	c.-19-10549G>A
4	519330	C	T	PASS	intron_variant	MODIFIER	CHRM3	403827	transcript	XM_014112713.2	protein_coding	6	c.-19-10549G>A
4	519330	C	T	PASS	intron_variant	MODIFIER	CHRM3	403827	transcript	XM_014112714.2	protein_coding	2	c.-19-10549G>A
4	519330	C	T	PASS	intron_variant	MODIFIER	CHRM3	403827	transcript	XM_022417355.1	protein_coding	5	c.-19-10549G>A
4	519330	C	T	PASS	intron_variant	MODIFIER	CHRM3	403827	transcript	XM_022417356.1	protein_coding	6	c.-19-10549G>A
4	519330	C	T	PASS	intron_variant	MODIFIER	CHRM3	403827	transcript	XM_022417357.1	protein_coding	7	c.-19-10549G>A
4	519330	C	T	PASS	intron_variant	MODIFIER	CHRM3	403827	transcript	XM_022417358.1	protein_coding	7	c.-19-10549G>A
4	519330	C	T	PASS	intron_variant	MODIFIER	CHRM3	403827	transcript	XM_022417359.1	protein_coding	6	c.-19-10549G>A
4	519330	C	T	PASS	intron_variant	MODIFIER	CHRM3	403827	transcript	XM_022417360.1	protein_coding	5	c.-19-10549G>A
4	519330	C	T	PASS	intron_variant	MODIFIER	CHRM3	403827	transcript	XM_022417361.1	protein_coding	3	c.-19-10549G>A
4	519330	C	T	PASS	intron_variant	MODIFIER	CHRM3	403827	transcript	XM_022417362.1	protein_coding	3	c.-19-10549G>A
4	891216	T	G	PASS	intron_variant	MODIFIER	CHRM3	403827	transcript	XM_005618760.2	protein_coding	1	c.-295-32669A>C
4	891216	T	G	PASS	intron_variant	MODIFIER	CHRM3	403827	transcript	XM_005618761.2	protein_coding	1	c.-299-32669A>C
4	891216	T	G	PASS	intron_variant	MODIFIER	CHRM3	403827	transcript	XM_005618763.2	protein_coding	1	c.-232-32669A>C
4	891216	T	G	PASS	intron_variant	MODIFIER	CHRM3	403827	transcript	XM_005618766.2	protein_coding	1	c.-398-32669A>C
4	891216	T	G	PASS	intron_variant	MODIFIER	CHRM3	403827	transcript	XM_005618768.2	protein_coding	1	c.-324-32669A>C
4	891216	T	G	PASS	intron_variant	MODIFIER	CHRM3	403827	transcript	XM_005618769.2	protein_coding	1	c.-462-32669A>C
4	891216	T	G	PASS	intron_variant	MODIFIER	CHRM3	403827	transcript	XM_014112712.2	protein_coding	1	c.-236-32669A>C
4	891216	T	G	PASS	intron_variant	MODIFIER	CHRM3	403827	transcript	XM_014112713.2	protein_coding	1	c.-587-32669A>C
4	891216	T	G	PASS	intron_variant	MODIFIER	CHRM3	403827	transcript	XM_014112714.2	protein_coding	1	c.-124+108126A>C
4	891216	T	G	PASS	intron_variant	MODIFIER	CHRM3	403827	transcript	XM_022417355.1	protein_coding	1	c.-505-32669A>C
4	891216	T	G	PASS	intron_variant	MODIFIER	CHRM3	403827	transcript	XM_022417356.1	protein_coding	1	c.-565-32669A>C
4	891216	T	G	PASS	intron_variant	MODIFIER	CHRM3	403827	transcript	XM_022417357.1	protein_coding	1	c.-594-32669A>C
4	891216	T	G	PASS	intron_variant	MODIFIER	CHRM3	403827	transcript	XM_022417358.1	protein_coding	1	c.-660-32669A>C
4	891216	T	G	PASS	intron_variant	MODIFIER	CHRM3	403827	transcript	XM_022417359.1	protein_coding	1	c.-551-32669A>C
4	891216	T	G	PASS	intron_variant	MODIFIER	CHRM3	403827	transcript	XM_022417360.1	protein_coding	2	c.-295-32669A>C
4	891216	T	G	PASS	intron_variant	MODIFIER	CHRM3	403827	transcript	XM_022417361.1	protein_coding	1	c.-187+108126A>C
4	891216	T	G	PASS	intron_variant	MODIFIER	CHRM3	403827	transcript	XM_022417362.1	protein_coding	1	c.-334+108126A>C
4	911287	A	T	GATKstd	intron_variant	MODIFIER	CHRM3	403827	transcript	XM_005618760.2	protein_coding	1	c.-295-52740T>A
4	911287	A	T	GATKstd	intron_variant	MODIFIER	CHRM3	403827	transcript	XM_005618761.2	protein_coding	1	c.-299-52740T>A
4	911287	A	T	GATKstd	intron_variant	MODIFIER	CHRM3	403827	transcript	XM_005618763.2	protein_coding	1	c.-232-52740T>A
4	911287	A	T	GATKstd	intron_variant	MODIFIER	CHRM3	403827	transcript	XM_005618766.2	protein_coding	1	c.-398-52740T>A
4	911287	A	T	GATKstd	intron_variant	MODIFIER	CHRM3	403827	transcript	XM_005618768.2	protein_coding	1	c.-324-52740T>A
4	911287	A	T	GATKstd	intron_variant	MODIFIER	CHRM3	403827	transcript	XM_005618769.2	protein_coding	1	c.-462-52740T>A
4	911287	A	T	GATKstd	intron_variant	MODIFIER	CHRM3	403827	transcript	XM_014112712.2	protein_coding	1	c.-236-52740T>A
4	911287	A	T	GATKstd	intron_variant	MODIFIER	CHRM3	403827	transcript	XM_014112713.2	protein_coding	1	c.-587-52740T>A
4	911287	A	T	GATKstd	intron_variant	MODIFIER	CHRM3	403827	transcript	XM_014112714.2	protein_coding	1	c.-124+88055T>A
4	911287	A	T	GATKstd	intron_variant	MODIFIER	CHRM3	403827	transcript	XM_022417355.1	protein_coding	1	c.-505-52740T>A
4	911287	A	T	GATKstd	intron_variant	MODIFIER	CHRM3	403827	transcript	XM_022417356.1	protein_coding	1	c.-565-52740T>A
4	911287	A	T	GATKstd	intron_variant	MODIFIER	CHRM3	403827	transcript	XM_022417357.1	protein_coding	1	c.-594-52740T>A
4	911287	A	T	GATKstd	intron_variant	MODIFIER	CHRM3	403827	transcript	XM_022417358.1	protein_coding	1	c.-660-52740T>A
4	911287	A	T	GATKstd	intron_variant	MODIFIER	CHRM3	403827	transcript	XM_022417359.1	protein_coding	1	c.-551-52740T>A
4	911287	A	T	GATKstd	intron_variant	MODIFIER	CHRM3	403827	transcript	XM_022417360.1	protein_coding	2	c.-295-52740T>A
4	911287	A	T	GATKstd	intron_variant	MODIFIER	CHRM3	403827	transcript	XM_022417361.1	protein_coding	1	c.-187+88055T>A
4	911287	A	T	GATKstd	intron_variant	MODIFIER	CHRM3	403827	transcript	XM_022417362.1	protein_coding	1	c.-334+88055T>A
4	1890199	G	A	PASS	upstream_gene_variant	MODIFIER	LOC100686977	100686977	transcript	100686977	pseudogene	-1	n.-705G>A
4	1890199	G	A	PASS	intergenic_region	MODIFIER	LOC111095424-LOC100686977	111095424-100686977	intergenic_region	111095424-100686977		-1	n.1890199G>A
4	4478004	C	T	GATKstd	intron_variant	MODIFIER	B3GALNT2	479196	transcript	XM_536338.5	protein_coding	6	c.762+666C>T
4	4478004	C	T	GATKstd	intron_variant	MODIFIER	B3GALNT2	479196	transcript	XM_022417399.1	protein_coding	5	c.652-2029C>T
4	4634826	T	C	GATKstd	intron_variant	MODIFIER	ARID4B	488959	transcript	XM_005618808.3	protein_coding	2	c.7-28622T>C
4	4634826	T	C	GATKstd	intron_variant	MODIFIER	ARID4B	488959	transcript	XM_005618809.3	protein_coding	2	c.7-28622T>C
4	4634826	T	C	GATKstd	intron_variant	MODIFIER	ARID4B	488959	transcript	XR_002625564.1	pseudogene	2	n.192-28622T>C
4	4634826	T	C	GATKstd	intron_variant	MODIFIER	ARID4B	488959	transcript	XM_022417404.1	protein_coding	2	c.7-28622T>C
4	4634826	T	C	GATKstd	intron_variant	MODIFIER	ARID4B	488959	transcript	XM_851566.6	protein_coding	2	c.7-28622T>C
4	4634826	T	C	GATKstd	intron_variant	MODIFIER	ARID4B	488959	transcript	XM_851728.6	protein_coding	2	c.7-28622T>C
4	4634826	T	C	GATKstd	intron_variant	MODIFIER	ARID4B	488959	transcript	XM_022417403.1	protein_coding	2	c.7-28622T>C
4	4643148	T	G	PASS	intron_variant	MODIFIER	ARID4B	488959	transcript	XM_005618808.3	protein_coding	2	c.7-20300T>G
4	4643148	T	G	PASS	intron_variant	MODIFIER	ARID4B	488959	transcript	XM_005618809.3	protein_coding	2	c.7-20300T>G
4	4643148	T	G	PASS	intron_variant	MODIFIER	ARID4B	488959	transcript	XR_002625564.1	pseudogene	2	n.192-20300T>G
4	4643148	T	G	PASS	intron_variant	MODIFIER	ARID4B	488959	transcript	XM_022417404.1	protein_coding	2	c.7-20300T>G
4	4643148	T	G	PASS	intron_variant	MODIFIER	ARID4B	488959	transcript	XM_851566.6	protein_coding	2	c.7-20300T>G
4	4643148	T	G	PASS	intron_variant	MODIFIER	ARID4B	488959	transcript	XM_851728.6	protein_coding	2	c.7-20300T>G
4	4643148	T	G	PASS	intron_variant	MODIFIER	ARID4B	488959	transcript	XM_022417403.1	protein_coding	2	c.7-20300T>G
4	4901867	G	A	GATKstd	downstream_gene_variant	MODIFIER	LOC111089982	111089982	transcript	111089982	pseudogene	-1	n.*949G>A
4	4901867	G	A	GATKstd	intergenic_region	MODIFIER	LOC111089982-LOC111095430	111089982-111095430	intergenic_region	111089982-111095430		-1	n.4901867G>A
4	4954990	G	A	PASS	intergenic_region	MODIFIER	LOC111095430-LOC111095433	111095430-111095433	intergenic_region	111095430-111095433		-1	n.4954990G>A
4	5349441	C	T	PASS	intergenic_region	MODIFIER	LOC106558664-TARBP1	106558664-479200	intergenic_region	106558664-479200		-1	n.5349441C>T
4	5453374	G	A	GATKstd	upstream_gene_variant	MODIFIER	LOC102155552	102155552	transcript	XR_001315933.2	pseudogene	-1	n.-1170G>A
4	5453374	G	A	GATKstd	upstream_gene_variant	MODIFIER	LOC102155069	102155069	transcript	102155069	pseudogene	-1	n.-3315G>A
4	5453374	G	A	GATKstd	intron_variant	MODIFIER	COA6	607627	transcript	XM_844384.5	protein_coding	2	c.144+442C>T
4	6853571	G	A	PASS	upstream_gene_variant	MODIFIER	LOC111095435	111095435	transcript	XR_002625582.1	pseudogene	-1	n.-3032C>T
4	6853571	G	A	PASS	intron_variant	MODIFIER	LOC111095436	111095436	transcript	XR_002625583.1	pseudogene	1	n.138+2734G>A
4	8698243	C	T	PASS	downstream_gene_variant	MODIFIER	AGT	403783	transcript	XM_005618833.2	protein_coding	-1	c.*4744C>T
4	8698243	C	T	PASS	downstream_gene_variant	MODIFIER	MIR1841	100886085	transcript	NR_049323.1	pseudogene	-1	n.*4595G>A
4	8698243	C	T	PASS	downstream_gene_variant	MODIFIER	MIR1841	100886085	transcript	TRANSCRIPT_100886085	pseudogene	-1	n.*4633G>A
4	8698243	C	T	PASS	intergenic_region	MODIFIER	AGT-MIR1841	403783-100886085	intergenic_region	403783-100886085		-1	n.8698243C>T
4	8776765	C	T	GATKstd	intergenic_region	MODIFIER	LOC479206-LOC111095695	479206-111095695	intergenic_region	479206-111095695		-1	n.8776765C>T
4	8776767	T	A	GATKstd	intergenic_region	MODIFIER	LOC479206-LOC111095695	479206-111095695	intergenic_region	479206-111095695		-1	n.8776767T>A
4	8776768	G	GAA	PASS	intergenic_region	MODIFIER	LOC479206-LOC111095695	479206-111095695	intergenic_region	479206-111095695		-1	n.8776768_8776769insAA
4	8963698	T	A	GATKstd	intergenic_region	MODIFIER	LOC111095696-PGBD5	111095696-100855465	intergenic_region	111095696-100855465		-1	n.8963698T>A
4	12971088	TCTCA	T	PASS	downstream_gene_variant	MODIFIER	RHOBTB1	488998	transcript	XM_005618903.3	protein_coding	-1	c.*2569_*2572delTGAG
4	12971088	TCTCA	T	PASS	downstream_gene_variant	MODIFIER	RHOBTB1	488998	transcript	XM_005618910.2	protein_coding	-1	c.*2569_*2572delTGAG
4	12971088	TCTCA	T	PASS	downstream_gene_variant	MODIFIER	RHOBTB1	488998	transcript	XM_022417454.1	protein_coding	-1	c.*2569_*2572delTGAG
4	12971088	TCTCA	T	PASS	downstream_gene_variant	MODIFIER	RHOBTB1	488998	transcript	XM_005618907.3	protein_coding	-1	c.*2569_*2572delTGAG
4	12971088	TCTCA	T	PASS	downstream_gene_variant	MODIFIER	RHOBTB1	488998	transcript	XM_844405.5	protein_coding	-1	c.*2569_*2572delTGAG
4	12971088	TCTCA	T	PASS	downstream_gene_variant	MODIFIER	RHOBTB1	488998	transcript	XM_022417452.1	protein_coding	-1	c.*2569_*2572delTGAG
4	12971088	TCTCA	T	PASS	downstream_gene_variant	MODIFIER	RHOBTB1	488998	transcript	XM_005618905.3	protein_coding	-1	c.*2569_*2572delTGAG
4	12971088	TCTCA	T	PASS	downstream_gene_variant	MODIFIER	RHOBTB1	488998	transcript	XM_022417451.1	protein_coding	-1	c.*2569_*2572delTGAG
4	12971088	TCTCA	T	PASS	downstream_gene_variant	MODIFIER	RHOBTB1	488998	transcript	XM_005618906.3	protein_coding	-1	c.*2569_*2572delTGAG
4	12971088	TCTCA	T	PASS	downstream_gene_variant	MODIFIER	RHOBTB1	488998	transcript	XM_022417453.1	protein_coding	-1	c.*2569_*2572delTGAG
4	12971088	TCTCA	T	PASS	downstream_gene_variant	MODIFIER	RHOBTB1	488998	transcript	XM_022417455.1	protein_coding	-1	c.*3206_*3209delTGAG
4	12971088	TCTCA	T	PASS	intergenic_region	MODIFIER	CDK1-RHOBTB1	100856079-488998	intergenic_region	100856079-488998		-1	n.12971089_12971092delCTCA
4	12997170	G	A	GATKstd	intron_variant	MODIFIER	RHOBTB1	488998	transcript	XM_005618903.3	protein_coding	5	c.297-4832C>T
4	12997170	G	A	GATKstd	intron_variant	MODIFIER	RHOBTB1	488998	transcript	XM_005618910.2	protein_coding	2	c.65+430C>T
4	12997170	G	A	GATKstd	intron_variant	MODIFIER	RHOBTB1	488998	transcript	XM_022417454.1	protein_coding	2	c.297-4832C>T
4	12997170	G	A	GATKstd	intron_variant	MODIFIER	RHOBTB1	488998	transcript	XM_005618907.3	protein_coding	3	c.297-4832C>T
4	12997170	G	A	GATKstd	intron_variant	MODIFIER	RHOBTB1	488998	transcript	XM_844405.5	protein_coding	4	c.297-4832C>T
4	12997170	G	A	GATKstd	intron_variant	MODIFIER	RHOBTB1	488998	transcript	XM_022417452.1	protein_coding	5	c.297-4832C>T
4	12997170	G	A	GATKstd	intron_variant	MODIFIER	RHOBTB1	488998	transcript	XM_005618905.3	protein_coding	4	c.297-4832C>T
4	12997170	G	A	GATKstd	intron_variant	MODIFIER	RHOBTB1	488998	transcript	XM_022417451.1	protein_coding	5	c.297-4832C>T
4	12997170	G	A	GATKstd	intron_variant	MODIFIER	RHOBTB1	488998	transcript	XM_005618906.3	protein_coding	4	c.297-4832C>T
4	12997170	G	A	GATKstd	intron_variant	MODIFIER	RHOBTB1	488998	transcript	XM_022417453.1	protein_coding	5	c.297-4832C>T
4	12997170	G	A	GATKstd	intron_variant	MODIFIER	RHOBTB1	488998	transcript	XM_022417455.1	protein_coding	4	c.297-4832C>T
4	13449855	A	T	GATKstd	intergenic_region	MODIFIER	LOC111095703-TMEM26	111095703-489000	intergenic_region	111095703-489000		-1	n.13449855A>T
4	41410314	T	A	GATKstd	intron_variant	MODIFIER	KCNIP1	489125	transcript	XM_005619219.3	protein_coding	1	c.61+21136A>T
4	41410314	T	A	GATKstd	intron_variant	MODIFIER	KCNIP1	489125	transcript	XM_546243.6	protein_coding	1	c.61+21136A>T
4	41410314	T	A	GATKstd	intron_variant	MODIFIER	KCNIP1	489125	transcript	XM_022417710.1	protein_coding	1	c.88+156066A>T
4	41410315	C	G	GATKstd	intron_variant	MODIFIER	KCNIP1	489125	transcript	XM_005619219.3	protein_coding	1	c.61+21135G>C
4	41410315	C	G	GATKstd	intron_variant	MODIFIER	KCNIP1	489125	transcript	XM_546243.6	protein_coding	1	c.61+21135G>C
4	41410315	C	G	GATKstd	intron_variant	MODIFIER	KCNIP1	489125	transcript	XM_022417710.1	protein_coding	1	c.88+156065G>C
4	43323428	G	C	GATKstd	intron_variant	MODIFIER	WWC1	479297	transcript	XM_014113022.2	protein_coding	9	c.1185-3172C>G
4	43323428	G	C	GATKstd	intron_variant	MODIFIER	WWC1	479297	transcript	XM_022417719.1	protein_coding	9	c.1146-3172C>G
4	43323428	G	C	GATKstd	intron_variant	MODIFIER	WWC1	479297	transcript	XM_003434507.4	protein_coding	9	c.1185-3172C>G
4	43323428	G	C	GATKstd	intron_variant	MODIFIER	WWC1	479297	transcript	XM_005619227.3	protein_coding	9	c.1185-3172C>G
4	43323428	G	C	GATKstd	intron_variant	MODIFIER	WWC1	479297	transcript	XM_014113023.2	protein_coding	9	c.1185-3172C>G
4	43323428	G	C	GATKstd	intron_variant	MODIFIER	WWC1	479297	transcript	XM_536435.6	protein_coding	9	c.1185-3172C>G
4	43323428	G	C	GATKstd	intron_variant	MODIFIER	WWC1	479297	transcript	XM_014113024.2	protein_coding	9	c.1185-3172C>G
4	43424988	C	T	GATKstd	intron_variant	MODIFIER	WWC1	479297	transcript	XM_014113022.2	protein_coding	1	c.119+6038G>A
4	43424988	C	T	GATKstd	intron_variant	MODIFIER	WWC1	479297	transcript	XM_003434507.4	protein_coding	1	c.119+6038G>A
4	43424988	C	T	GATKstd	intron_variant	MODIFIER	WWC1	479297	transcript	XM_005619227.3	protein_coding	1	c.119+6038G>A
4	43424988	C	T	GATKstd	intron_variant	MODIFIER	WWC1	479297	transcript	XM_014113023.2	protein_coding	1	c.119+6038G>A
4	43424988	C	T	GATKstd	intron_variant	MODIFIER	WWC1	479297	transcript	XM_536435.6	protein_coding	1	c.119+6038G>A
4	43424988	C	T	GATKstd	intron_variant	MODIFIER	WWC1	479297	transcript	XM_014113024.2	protein_coding	1	c.119+6038G>A
4	43463701	G	T	GATKstd	intron_variant	MODIFIER	TENM2	489135	transcript	XM_014113025.2	protein_coding	29	c.7432+1323C>A
4	43463701	G	T	GATKstd	intron_variant	MODIFIER	TENM2	489135	transcript	XM_014113031.2	protein_coding	26	c.6946+1323C>A
4	43463701	G	T	GATKstd	intron_variant	MODIFIER	TENM2	489135	transcript	XM_014113033.2	protein_coding	26	c.6841+1323C>A
4	43463701	G	T	GATKstd	intron_variant	MODIFIER	TENM2	489135	transcript	XM_014113034.2	protein_coding	25	c.6766+1323C>A
4	43463701	G	T	GATKstd	intron_variant	MODIFIER	TENM2	489135	transcript	XM_014113030.2	protein_coding	26	c.6976+1323C>A
4	43463701	G	T	GATKstd	intron_variant	MODIFIER	TENM2	489135	transcript	XM_022417723.1	protein_coding	29	c.7135+1323C>A
4	43463701	G	T	GATKstd	intron_variant	MODIFIER	TENM2	489135	transcript	XM_022417721.1	protein_coding	28	c.7432+1323C>A
4	43463701	G	T	GATKstd	intron_variant	MODIFIER	TENM2	489135	transcript	XM_022417722.1	protein_coding	36	c.7405+1323C>A
4	43527710	C	T	GATKstd	intron_variant	MODIFIER	TENM2	489135	transcript	XM_014113025.2	protein_coding	16	c.2781-1720G>A
4	43527710	C	T	GATKstd	intron_variant	MODIFIER	TENM2	489135	transcript	XM_014113031.2	protein_coding	13	c.2295-1720G>A
4	43527710	C	T	GATKstd	intron_variant	MODIFIER	TENM2	489135	transcript	XM_014113033.2	protein_coding	13	c.2190-1720G>A
4	43527710	C	T	GATKstd	intron_variant	MODIFIER	TENM2	489135	transcript	XM_014113034.2	protein_coding	12	c.2115-1720G>A
4	43527710	C	T	GATKstd	intron_variant	MODIFIER	TENM2	489135	transcript	XM_014113030.2	protein_coding	13	c.2325-1720G>A
4	43527710	C	T	GATKstd	intron_variant	MODIFIER	TENM2	489135	transcript	XM_022417723.1	protein_coding	16	c.2484-1720G>A
4	43527710	C	T	GATKstd	intron_variant	MODIFIER	TENM2	489135	transcript	XM_022417721.1	protein_coding	15	c.2781-1720G>A
4	43527710	C	T	GATKstd	intron_variant	MODIFIER	TENM2	489135	transcript	XM_022417722.1	protein_coding	23	c.2754-1720G>A
4	44513208	A	C	GATKstd	intron_variant	MODIFIER	TENM2	489135	transcript	XM_014113025.2	protein_coding	2	c.-75+63501T>G
4	44513208	A	C	GATKstd	intron_variant	MODIFIER	TENM2	489135	transcript	XM_022417722.1	protein_coding	9	c.-75+63501T>G
4	44926825	T	C	GATKstd	intron_variant	MODIFIER	TENM2	489135	transcript	XM_022417722.1	protein_coding	1	c.-1070-26752A>G
4	84176443	A	G	GATKstd	intron_variant	MODIFIER	CDH18	489256	transcript	XM_014113160.2	protein_coding	1	c.-459-13176A>G
4	84176443	A	G	GATKstd	intron_variant	MODIFIER	CDH18	489256	transcript	XM_022417962.1	protein_coding	1	c.-459-13176A>G
4	84176443	A	G	GATKstd	intron_variant	MODIFIER	CDH18	489256	transcript	XM_022417960.1	protein_coding	1	c.-512-13176A>G
4	84176443	A	G	GATKstd	intron_variant	MODIFIER	CDH18	489256	transcript	XM_022417961.1	protein_coding	1	c.-459-13176A>G
4	84176443	A	G	GATKstd	intron_variant	MODIFIER	CDH18	489256	transcript	XM_546374.5	protein_coding	1	c.-459-13176A>G
4	87696919	G	C	GATKstd	upstream_gene_variant	MODIFIER	LOC102151393	102151393	transcript	XR_002626201.1	pseudogene	-1	n.-1193C>G
4	87696919	G	C	GATKstd	upstream_gene_variant	MODIFIER	LOC102151393	102151393	transcript	XR_002626202.1	pseudogene	-1	n.-1193C>G
4	87696919	G	C	GATKstd	upstream_gene_variant	MODIFIER	LOC102151393	102151393	transcript	XR_292179.3	pseudogene	-1	n.-1193C>G
4	87696919	G	C	GATKstd	intergenic_region	MODIFIER	LOC102151393-LOC100688076	102151393-100688076	intergenic_region	102151393-100688076		-1	n.87696919G>C
5	7952608	A	G	GATKstd	intron_variant	MODIFIER	KIRREL3	489289	transcript	XM_005619570.3	protein_coding	1	c.56-47840A>G
5	7952608	A	G	GATKstd	intron_variant	MODIFIER	KIRREL3	489289	transcript	XM_014113292.2	protein_coding	1	c.56-47840A>G
5	7952608	A	G	GATKstd	intron_variant	MODIFIER	KIRREL3	489289	transcript	XM_005619571.3	protein_coding	1	c.56-47840A>G
5	7952608	A	G	GATKstd	intron_variant	MODIFIER	KIRREL3	489289	transcript	XM_005619572.3	protein_coding	1	c.56-47840A>G
5	7952608	A	G	GATKstd	intron_variant	MODIFIER	KIRREL3	489289	transcript	XM_546407.7	protein_coding	1	c.56-47840A>G
5	8089347	C	T	GATKstd	intron_variant	MODIFIER	KIRREL3	489289	transcript	XM_005619570.3	protein_coding	5	c.592-2261C>T
5	8089347	C	T	GATKstd	intron_variant	MODIFIER	KIRREL3	489289	transcript	XM_014113292.2	protein_coding	5	c.592-2261C>T
5	8089347	C	T	GATKstd	intron_variant	MODIFIER	KIRREL3	489289	transcript	XM_005619571.3	protein_coding	5	c.592-2261C>T
5	8089347	C	T	GATKstd	intron_variant	MODIFIER	KIRREL3	489289	transcript	XM_005619572.3	protein_coding	5	c.592-2261C>T
5	8089347	C	T	GATKstd	intron_variant	MODIFIER	KIRREL3	489289	transcript	XM_546407.7	protein_coding	5	c.592-2261C>T
5	8089347	C	T	GATKstd	intron_variant	MODIFIER	KIRREL3	489289	transcript	XM_022418103.1	protein_coding	3	c.322-2261C>T
5	8101854	G	A	GATKstd	intron_variant	MODIFIER	KIRREL3	489289	transcript	XM_005619570.3	protein_coding	7	c.849-1342G>A
5	8101854	G	A	GATKstd	intron_variant	MODIFIER	KIRREL3	489289	transcript	XM_014113292.2	protein_coding	7	c.849-1342G>A
5	8101854	G	A	GATKstd	intron_variant	MODIFIER	KIRREL3	489289	transcript	XM_005619571.3	protein_coding	7	c.849-1342G>A
5	8101854	G	A	GATKstd	intron_variant	MODIFIER	KIRREL3	489289	transcript	XM_005619572.3	protein_coding	7	c.849-1342G>A
5	8101854	G	A	GATKstd	intron_variant	MODIFIER	KIRREL3	489289	transcript	XM_546407.7	protein_coding	7	c.849-1342G>A
5	8101854	G	A	GATKstd	intron_variant	MODIFIER	KIRREL3	489289	transcript	XM_022418103.1	protein_coding	5	c.579-1342G>A
5	8409695	T	C	GATKstd	intergenic_region	MODIFIER	LOC111096093-CDON	111096093-489296	intergenic_region	111096093-489296		-1	n.8409695T>C
5	8602298	C	G	GATKstd	intron_variant	MODIFIER	HYLS1	609650	transcript	XM_005619583.2	protein_coding	2	c.-155+1408G>C
5	8602298	C	G	GATKstd	intron_variant	MODIFIER	HYLS1	609650	transcript	XM_014113311.2	protein_coding	1	c.-168+103G>C
5	8602298	C	G	GATKstd	intron_variant	MODIFIER	HYLS1	609650	transcript	XM_005619585.3	protein_coding	1	c.-155+103G>C
5	8602298	C	G	GATKstd	intron_variant	MODIFIER	HYLS1	609650	transcript	XM_846949.5	protein_coding	1	c.-76+103G>C
5	8602298	C	G	GATKstd	intron_variant	MODIFIER	HYLS1	609650	transcript	XM_005619584.2	protein_coding	1	c.-154-2542G>C
5	8602298	C	G	GATKstd	intron_variant	MODIFIER	HYLS1	609650	transcript	XM_005619586.2	protein_coding	1	c.-75-2542G>C
5	8602298	C	G	GATKstd	intron_variant	MODIFIER	HYLS1	609650	transcript	XM_014113310.2	protein_coding	2	c.-168+1408G>C
5	8602298	C	G	GATKstd	intron_variant	MODIFIER	HYLS1	609650	transcript	XM_022418111.1	protein_coding	2	c.-155+1408G>C
5	8602298	C	G	GATKstd	intron_variant	MODIFIER	HYLS1	609650	transcript	XM_022418112.1	protein_coding	2	c.-76+1408G>C
5	8616093	C	T	GATKstd	intergenic_region	MODIFIER	HYLS1-LOC111095794	609650-111095794	intergenic_region	609650-111095794		-1	n.8616093C>T
5	9393985	T	C	GATKstd	intron_variant	MODIFIER	SLC37A2	489303	transcript	XM_022418136.1	protein_coding	4	c.342-163A>G
5	9393985	T	C	GATKstd	intron_variant	MODIFIER	SLC37A2	489303	transcript	XM_022418139.1	protein_coding	4	c.204-163A>G
5	9393985	T	C	GATKstd	intron_variant	MODIFIER	SLC37A2	489303	transcript	XM_005619600.3	protein_coding	4	c.342-163A>G
5	9393985	T	C	GATKstd	intron_variant	MODIFIER	SLC37A2	489303	transcript	XM_022418137.1	protein_coding	4	c.288-163A>G
5	9393985	T	C	GATKstd	intron_variant	MODIFIER	SLC37A2	489303	transcript	XM_005619601.3	protein_coding	4	c.204-163A>G
5	9393985	T	C	GATKstd	intron_variant	MODIFIER	SLC37A2	489303	transcript	XM_022418138.1	protein_coding	4	c.273-163A>G
5	12192406	C	T	PASS	intron_variant	MODIFIER	LOC106558788	106558788	transcript	XR_002626402.1	pseudogene	2	n.3750-2972C>T
5	12477862	G	T	PASS	intergenic_region	MODIFIER	LOC111096096-LOC111095804	111096096-111095804	intergenic_region	111096096-111095804		-1	n.12477862G>T
5	12477910	G	T	PASS	intergenic_region	MODIFIER	LOC111096096-LOC111095804	111096096-111095804	intergenic_region	111096096-111095804		-1	n.12477910G>T
5	15004291	A	G	PASS	intron_variant	MODIFIER	DDX6	479414	transcript	XM_005619696.3	protein_coding	1	c.-274-766A>G
5	15004291	A	G	PASS	intron_variant	MODIFIER	DDX6	479414	transcript	XM_844882.5	protein_coding	1	c.-274-766A>G
5	15004291	A	G	PASS	intron_variant	MODIFIER	DDX6	479414	transcript	XM_022418224.1	protein_coding	1	c.-274-766A>G
5	15192025	C	G	PASS	intron_variant	MODIFIER	IFT46	479416	transcript	XM_536553.5	protein_coding	7	c.474+369C>G
5	18667896	G	GT	PASS	intergenic_region	MODIFIER	LOC111095827-NXPE4	111095827-489394	intergenic_region	111095827-489394		-1	n.18667896_18667897insT
5	18697792	C	T	GATKstd	intron_variant	MODIFIER	NXPE4	489394	transcript	XM_022418283.1	protein_coding	2	c.39-5347C>T
5	18697792	C	T	GATKstd	intron_variant	MODIFIER	NXPE4	489394	transcript	XM_022418286.1	protein_coding	3	c.97-10608C>T
5	18697792	C	T	GATKstd	intron_variant	MODIFIER	NXPE4	489394	transcript	XM_022418288.1	protein_coding	3	c.97-10608C>T
5	18697792	C	T	GATKstd	intron_variant	MODIFIER	NXPE4	489394	transcript	XM_022418285.1	protein_coding	2	c.39-5347C>T
5	18697792	C	T	GATKstd	intron_variant	MODIFIER	NXPE4	489394	transcript	XM_022418284.1	protein_coding	2	c.39-5347C>T
5	18697792	C	T	GATKstd	intron_variant	MODIFIER	NXPE4	489394	transcript	XM_022418287.1	protein_coding	3	c.97-10608C>T
5	18697792	C	T	GATKstd	intron_variant	MODIFIER	NXPE4	489394	transcript	XM_022418289.1	protein_coding	2	c.-19-5347C>T
5	18697792	C	T	GATKstd	intron_variant	MODIFIER	NXPE4	489394	transcript	XM_022418293.1	protein_coding	2	c.-80-5347C>T
5	18697792	C	T	GATKstd	intron_variant	MODIFIER	NXPE4	489394	transcript	XM_022418294.1	protein_coding	1	c.-51-10608C>T
5	18697792	C	T	GATKstd	intron_variant	MODIFIER	NXPE4	489394	transcript	XM_022418297.1	protein_coding	1	c.39-5347C>T
5	18697792	C	T	GATKstd	intron_variant	MODIFIER	NXPE4	489394	transcript	XM_005619744.2	protein_coding	2	c.-19-5347C>T
5	18697792	C	T	GATKstd	intron_variant	MODIFIER	NXPE4	489394	transcript	XM_022418290.1	protein_coding	1	c.-19-5347C>T
5	18697792	C	T	GATKstd	intron_variant	MODIFIER	NXPE4	489394	transcript	XM_022418295.1	protein_coding	2	c.-51-10608C>T
5	18697792	C	T	GATKstd	intron_variant	MODIFIER	NXPE4	489394	transcript	XM_022418296.1	protein_coding	1	c.-51-10608C>T
5	18697792	C	T	GATKstd	intron_variant	MODIFIER	NXPE4	489394	transcript	XM_022418291.1	protein_coding	1	c.-19-5347C>T
5	19511019	T	A	GATKstd	intron_variant	MODIFIER	ZW10	479433	transcript	XM_536569.7	protein_coding	7	c.926-2405T>A
5	41138147	T	C	GATKstd	intron_variant	MODIFIER	PRPSAP2	489535	transcript	XM_005620140.3	protein_coding	8	c.584+2954A>G
5	41138147	T	C	GATKstd	intron_variant	MODIFIER	PRPSAP2	489535	transcript	XM_022418648.1	protein_coding	8	c.584+2954A>G
5	41138147	T	C	GATKstd	intron_variant	MODIFIER	PRPSAP2	489535	transcript	XM_546654.5	protein_coding	8	c.584+2954A>G
5	41138147	T	C	GATKstd	intron_variant	MODIFIER	PRPSAP2	489535	transcript	XM_005620141.2	protein_coding	7	c.584+2954A>G
5	64609970	T	TAAAAAAA	PASS	intron_variant	MODIFIER	PIEZO1	489662	transcript	XM_022419088.1	protein_coding	1	c.121+355_121+356insAAAAAAA
5	64609970	T	TAAAAAAA	PASS	intron_variant	MODIFIER	PIEZO1	489662	transcript	XM_005620574.2	protein_coding	1	c.65-2398_65-2397insAAAAAAA
5	64609970	T	TAAAAAAA	PASS	intron_variant	MODIFIER	PIEZO1	489662	transcript	XM_022419089.1	protein_coding	1	c.121+355_121+356insAAAAAAA
5	64609970	T	TAAAAAAA	PASS	intron_variant	MODIFIER	PIEZO1	489662	transcript	XM_022419090.1	protein_coding	1	c.121+355_121+356insAAAAAAA
5	67846897	C	CG	PASS	upstream_gene_variant	MODIFIER	KLHL36	489679	transcript	XM_005620639.3	protein_coding	-1	c.-3503_-3502insC
5	67846897	C	CG	PASS	upstream_gene_variant	MODIFIER	KLHL36	489679	transcript	XM_005620640.3	protein_coding	-1	c.-3503_-3502insC
5	67846897	C	CG	PASS	intron_variant	MODIFIER	KLHL36	489679	transcript	XM_546799.7	protein_coding	1	c.-16-3487_-16-3486insC
5	67947407	G	A	GATKstd	upstream_gene_variant	MODIFIER	LOC102152359	102152359	transcript	XR_292355.3	pseudogene	-1	n.-2567G>A
5	67947407	G	A	GATKstd	intergenic_region	MODIFIER	COTL1-LOC102152359	489680-102152359	intergenic_region	489680-102152359		-1	n.67947407G>A
5	71179920	TGC	T	PASS	upstream_gene_variant	MODIFIER	DYNLRB2	479636	transcript	XM_536771.6	protein_coding	-1	c.-988_-987delGC
5	71179920	TGC	T	PASS	intron_variant	MODIFIER	LOC111096025	111096025	transcript	XR_002627038.1	pseudogene	1	n.143+653_143+654delGC
5	71179920	TGC	T	PASS	intron_variant	MODIFIER	LOC111096025	111096025	transcript	XR_002627035.1	pseudogene	1	n.143+653_143+654delGC
5	71179920	TGC	T	PASS	intron_variant	MODIFIER	LOC111096025	111096025	transcript	XR_002627037.1	pseudogene	1	n.143+653_143+654delGC
5	71179920	TGC	T	PASS	intron_variant	MODIFIER	LOC111096025	111096025	transcript	XR_002627036.1	pseudogene	1	n.143+653_143+654delGC
5	83699094	T	C	GATKstd	intergenic_region	MODIFIER	LOC106558850-LOC111096130	106558850-111096130	intergenic_region	106558850-111096130		-1	n.83699094T>C
5	86703721	T	TAAAAGAAAAAAGAAAAAAAAAAAAAAAGAAAAAAAAAAA	PASS	intron_variant	MODIFIER	CDH8	489777	transcript	XM_014114123.2	protein_coding	9	c.1654+13448_1654+13449insAAAAGAAAAAAGAAAAAAAAAAAAAAAGAAAAAAAAAAA
5	86703721	T	TAAAAGAAAAAAGAAAAAAAAAAAAAAAGAAAAAAAAAAA	PASS	intron_variant	MODIFIER	CDH8	489777	transcript	XM_022419410.1	protein_coding	8	c.961+13448_961+13449insAAAAGAAAAAAGAAAAAAAAAAAAAAAGAAAAAAAAAAA
5	86703721	T	TAAAAGAAAAAAGAAAAAAAAAAAAAAAGAAAAAAAAAAA	PASS	intron_variant	MODIFIER	CDH8	489777	transcript	XM_022419411.1	protein_coding	2	c.97+13448_97+13449insAAAAGAAAAAAGAAAAAAAAAAAAAAAGAAAAAAAAAAA
6	10309870	GAAGGAAGGAAGGAAGGAAGGAAGGAAGGAAGGAAGGAAGGAAAGAGAGA	G	PASS	intron_variant	MODIFIER	MYH16	489862	transcript	XM_546980.7	protein_coding	11	c.1404+709_1404+757delTCTCTCTTTCCTTCCTTCCTTCCTTCCTTCCTTCCTTCCTTCCTTCCTT
6	21405231	A	AAC	PASS	downstream_gene_variant	MODIFIER	LOC102156764	102156764	transcript	XR_292481.3	pseudogene	-1	n.*56_*57insAC
6	21405231	A	AAC	PASS	downstream_gene_variant	MODIFIER	LOC102156764	102156764	transcript	XR_002627519.1	pseudogene	-1	n.*56_*57insAC
6	21405231	A	AAC	PASS	downstream_gene_variant	MODIFIER	LOC102156764	102156764	transcript	XR_002627517.1	pseudogene	-1	n.*56_*57insAC
6	21405231	A	AAC	PASS	downstream_gene_variant	MODIFIER	LOC102156764	102156764	transcript	XR_002627518.1	pseudogene	-1	n.*56_*57insAC
6	21405231	A	AAC	PASS	downstream_gene_variant	MODIFIER	LOC102156764	102156764	transcript	XR_002627520.1	pseudogene	-1	n.*56_*57insAC
6	21405231	A	AAC	PASS	intron_variant	MODIFIER	TNRC6A	489966	transcript	XM_005621399.3	protein_coding	2	c.80+15408_80+15409insGT
6	21405231	A	AAC	PASS	intron_variant	MODIFIER	TNRC6A	489966	transcript	XM_022419938.1	protein_coding	2	c.80+15408_80+15409insGT
6	21405231	A	AAC	PASS	intron_variant	MODIFIER	TNRC6A	489966	transcript	XM_005621402.3	protein_coding	2	c.80+15408_80+15409insGT
6	21405231	A	AAC	PASS	intron_variant	MODIFIER	TNRC6A	489966	transcript	XM_014114535.2	protein_coding	2	c.80+15408_80+15409insGT
6	21405231	A	AAC	PASS	intron_variant	MODIFIER	TNRC6A	489966	transcript	XM_022419936.1	protein_coding	2	c.80+15408_80+15409insGT
6	21405231	A	AAC	PASS	intron_variant	MODIFIER	TNRC6A	489966	transcript	XM_005621401.3	protein_coding	2	c.80+15408_80+15409insGT
6	21405231	A	AAC	PASS	intron_variant	MODIFIER	TNRC6A	489966	transcript	XM_022419937.1	protein_coding	2	c.80+15408_80+15409insGT
6	21405231	A	AAC	PASS	intron_variant	MODIFIER	TNRC6A	489966	transcript	XM_005621404.3	protein_coding	2	c.80+15408_80+15409insGT
6	21405231	A	AAC	PASS	intron_variant	MODIFIER	TNRC6A	489966	transcript	XR_001316396.2	pseudogene	2	n.359+15408_359+15409insGT
6	21405231	A	AAC	PASS	intron_variant	MODIFIER	TNRC6A	489966	transcript	XR_002627516.1	pseudogene	2	n.361+15408_361+15409insGT
6	21405231	A	AAC	PASS	intron_variant	MODIFIER	TNRC6A	489966	transcript	XM_022419939.1	protein_coding	2	c.80+15408_80+15409insGT
6	21405231	A	AAC	PASS	intron_variant	MODIFIER	TNRC6A	489966	transcript	XM_022419941.1	protein_coding	2	c.80+15408_80+15409insGT
6	22464970	G	GGGGT	PASS	upstream_gene_variant	MODIFIER	SCNN1B	489972	transcript	XM_022419496.1	protein_coding	-1	c.-1784_-1783insACCC
6	22464970	G	GGGGT	PASS	intron_variant	MODIFIER	SCNN1B	489972	transcript	NM_001313864.1	protein_coding	1	c.-8-1776_-8-1775insACCC
6	22464970	G	GGGGT	PASS	non_coding_transcript_exon_variant	MODIFIER	LOC102152642	102152642	transcript	XR_292486.2	pseudogene	3	n.441_442insGTGG
6	24888742	G	A	GATKstd	intron_variant	MODIFIER	LOC479822	479822	transcript	XM_536949.5	protein_coding	2	c.177+3498C>T
6	24888742	G	A	GATKstd	intron_variant	MODIFIER	LOC479822	479822	transcript	XM_005621477.2	protein_coding	2	c.177+3498C>T
6	24888742	G	A	GATKstd	intron_variant	MODIFIER	LOC479822	479822	transcript	XM_005621478.2	protein_coding	2	c.177+3498C>T
6	40684684	A	T	GATKstd	intergenic_region	MODIFIER	LOC611675-PGB	611675-403552	intergenic_region	611675-403552		-1	n.40684684A>T
6	40690386	TG	T	PASS	intergenic_region	MODIFIER	LOC611675-PGB	611675-403552	intergenic_region	611675-403552		-1	n.40690387delG
6	40690395	A	T	GATKstd	intergenic_region	MODIFIER	LOC611675-PGB	611675-403552	intergenic_region	611675-403552		-1	n.40690395A>T
6	65650234	T	A	GATKstd	intron_variant	MODIFIER	ADGRL2	490193	transcript	XM_022419501.1	protein_coding	4	c.398-1939A>T
6	65650234	T	A	GATKstd	intron_variant	MODIFIER	ADGRL2	490193	transcript	NM_001190488.1	protein_coding	5	c.398-2880A>T
6	65650234	T	A	GATKstd	intron_variant	MODIFIER	ADGRL2	490193	transcript	XM_022419506.1	protein_coding	3	c.398-2880A>T
6	65650234	T	A	GATKstd	intron_variant	MODIFIER	ADGRL2	490193	transcript	XM_022419508.1	protein_coding	3	c.398-2880A>T
6	65650234	T	A	GATKstd	intron_variant	MODIFIER	ADGRL2	490193	transcript	XM_022419509.1	protein_coding	3	c.398-2880A>T
6	65650234	T	A	GATKstd	intron_variant	MODIFIER	ADGRL2	490193	transcript	XM_022419502.1	protein_coding	4	c.398-1939A>T
6	65650234	T	A	GATKstd	intron_variant	MODIFIER	ADGRL2	490193	transcript	XM_022419504.1	protein_coding	4	c.398-2880A>T
6	65650234	T	A	GATKstd	intron_variant	MODIFIER	ADGRL2	490193	transcript	XM_022419505.1	protein_coding	4	c.398-1939A>T
6	65650234	T	A	GATKstd	intron_variant	MODIFIER	ADGRL2	490193	transcript	XM_022419507.1	protein_coding	4	c.398-1939A>T
6	65650234	T	A	GATKstd	intron_variant	MODIFIER	ADGRL2	490193	transcript	XM_022419503.1	protein_coding	4	c.398-1942A>T
6	65650234	T	A	GATKstd	intron_variant	MODIFIER	ADGRL2	490193	transcript	XM_022419511.1	protein_coding	4	c.398-1939A>T
6	65650234	T	A	GATKstd	intron_variant	MODIFIER	ADGRL2	490193	transcript	XM_022419510.1	protein_coding	4	c.398-1939A>T
6	65650234	T	A	GATKstd	intron_variant	MODIFIER	ADGRL2	490193	transcript	XM_022419514.1	protein_coding	3	c.398-2880A>T
6	65650234	T	A	GATKstd	intron_variant	MODIFIER	ADGRL2	490193	transcript	XM_022419512.1	protein_coding	4	c.398-1939A>T
6	65650234	T	A	GATKstd	intron_variant	MODIFIER	ADGRL2	490193	transcript	XM_022419515.1	protein_coding	3	c.398-2880A>T
6	65650234	T	A	GATKstd	intron_variant	MODIFIER	ADGRL2	490193	transcript	XM_022419513.1	protein_coding	4	c.398-1939A>T
6	66610504	G	A	GATKstd	intergenic_region	MODIFIER	LOC100685738-LOC111096528	100685738-111096528	intergenic_region	100685738-111096528		-1	n.66610504G>A
6	66795707	A	G	GATKstd	intergenic_region	MODIFIER	LOC102152021-LOC111096529	102152021-111096529	intergenic_region	102152021-111096529		-1	n.66795707A>G
6	67096827	A	G	GATKstd	intergenic_region	MODIFIER	LOC111096529-LOC111096438	111096529-111096438	intergenic_region	111096529-111096438		-1	n.67096827A>G
6	67309179	A	T	GATKstd	intergenic_region	MODIFIER	LOC100685921-LOC100684305	100685921-100684305	intergenic_region	100685921-100684305		-1	n.67309179A>T
6	67904357	C	G	GATKstd	intergenic_region	MODIFIER	LOC111096531-LOC111096532	111096531-111096532	intergenic_region	111096531-111096532		-1	n.67904357C>G
7	18246875	GGA	G	PASS	intron_variant	MODIFIER	RNF2	480042	transcript	XM_022420969.1	protein_coding	2	c.-3+4262_-3+4263delGA
7	20446442	T	TC	PASS	intron_variant	MODIFIER	AXDND1	480051	transcript	XM_005622463.3	protein_coding	9	c.867-9314_867-9313insG
7	20446442	T	TC	PASS	intron_variant	MODIFIER	AXDND1	480051	transcript	XM_022420988.1	protein_coding	9	c.867-9314_867-9313insG
7	20446442	T	TC	PASS	intron_variant	MODIFIER	AXDND1	480051	transcript	XM_022420991.1	protein_coding	7	c.417-9314_417-9313insG
7	20446442	T	TC	PASS	intron_variant	MODIFIER	AXDND1	480051	transcript	XM_022420989.1	protein_coding	8	c.795-9314_795-9313insG
7	20446442	T	TC	PASS	intron_variant	MODIFIER	AXDND1	480051	transcript	XM_014115152.2	protein_coding	9	c.867-9314_867-9313insG
7	20446442	T	TC	PASS	intron_variant	MODIFIER	AXDND1	480051	transcript	XM_022420987.1	protein_coding	9	c.867-9314_867-9313insG
7	20446442	T	TC	PASS	intron_variant	MODIFIER	AXDND1	480051	transcript	XM_022420990.1	protein_coding	9	c.867-9314_867-9313insG
7	24899953	T	A	GATKstd	intron_variant	MODIFIER	RABGAP1L	100855946	transcript	XM_014115176.2	protein_coding	13	c.1854+13813A>T
7	24899953	T	A	GATKstd	intron_variant	MODIFIER	RABGAP1L	100855946	transcript	XM_005622504.3	protein_coding	13	c.1746+13813A>T
7	24899953	T	A	GATKstd	intron_variant	MODIFIER	RABGAP1L	100855946	transcript	XM_014115177.2	protein_coding	13	c.1854+13813A>T
7	46388054	A	G	GATKstd	downstream_gene_variant	MODIFIER	LOC111096752	111096752	transcript	XR_002628591.1	pseudogene	-1	n.*1488A>G
7	46388054	A	G	GATKstd	downstream_gene_variant	MODIFIER	LOC111096752	111096752	transcript	XR_002628592.1	pseudogene	-1	n.*1488A>G
7	46388054	A	G	GATKstd	intergenic_region	MODIFIER	LOC111096752-LOC111096897	111096752-111096897	intergenic_region	111096752-111096897		-1	n.46388054A>G
7	47870521	CT	C	PASS	intron_variant	MODIFIER	RIT2	490475	transcript	XM_547597.6	protein_coding	3	c.235-2932delT
7	47870521	CT	C	PASS	intron_variant	MODIFIER	RIT2	490475	transcript	XM_005622856.3	protein_coding	4	c.130-2932delT
7	47870521	CT	C	PASS	intron_variant	MODIFIER	RIT2	490475	transcript	XM_014115446.2	protein_coding	5	c.130-2932delT
7	47870521	CT	C	PASS	intron_variant	MODIFIER	RIT2	490475	transcript	XM_022421434.1	protein_coding	3	c.130-2932delT
7	51350713	C	T	GATKstd	intron_variant	MODIFIER	LOC111096764	111096764	transcript	XR_002628616.1	pseudogene	2	n.242-607C>T
7	53168347	G	A	PASS	intron_variant	MODIFIER	KIAA1328	480155	transcript	XM_022421436.1	protein_coding	8	c.1322+2204C>T
7	53168347	G	A	PASS	intron_variant	MODIFIER	KIAA1328	480155	transcript	XM_022421447.1	protein_coding	5	c.884+2204C>T
7	53168347	G	A	PASS	intron_variant	MODIFIER	KIAA1328	480155	transcript	XM_022421446.1	protein_coding	5	c.884+2204C>T
7	53168347	G	A	PASS	intron_variant	MODIFIER	KIAA1328	480155	transcript	XM_022421439.1	protein_coding	8	c.1280+2204C>T
7	53168347	G	A	PASS	intron_variant	MODIFIER	KIAA1328	480155	transcript	XM_022421440.1	protein_coding	9	c.1280+2204C>T
7	53168347	G	A	PASS	intron_variant	MODIFIER	KIAA1328	480155	transcript	XM_022421442.1	protein_coding	8	c.1280+2204C>T
7	53168347	G	A	PASS	intron_variant	MODIFIER	KIAA1328	480155	transcript	XM_022421444.1	protein_coding	8	c.1274+2204C>T
7	53168347	G	A	PASS	intron_variant	MODIFIER	KIAA1328	480155	transcript	XM_022421445.1	protein_coding	7	c.1130+2204C>T
7	53168347	G	A	PASS	intron_variant	MODIFIER	KIAA1328	480155	transcript	XM_022421441.1	protein_coding	9	c.1280+2204C>T
7	53168347	G	A	PASS	intron_variant	MODIFIER	KIAA1328	480155	transcript	XM_022421443.1	protein_coding	8	c.1280+2204C>T
7	53168347	G	A	PASS	intron_variant	MODIFIER	KIAA1328	480155	transcript	XM_005622869.3	protein_coding	6	c.1055+2204C>T
7	53168347	G	A	PASS	intron_variant	MODIFIER	KIAA1328	480155	transcript	XM_005622871.3	protein_coding	7	c.1247+2204C>T
7	53168347	G	A	PASS	intron_variant	MODIFIER	KIAA1328	480155	transcript	XM_537278.6	protein_coding	7	c.1247+2204C>T
7	53168347	G	A	PASS	intron_variant	MODIFIER	KIAA1328	480155	transcript	XM_022421437.1	protein_coding	8	c.1322+2204C>T
7	61736211	T	A	GATKstd	intron_variant	MODIFIER	CHST9	100688744	transcript	XM_022421508.1	protein_coding	3	c.202+32687T>A
7	61736211	T	A	GATKstd	intron_variant	MODIFIER	CHST9	100688744	transcript	XM_022421509.1	protein_coding	2	c.163+32687T>A
7	61736211	T	A	GATKstd	intron_variant	MODIFIER	CHST9	100688744	transcript	XM_022421510.1	protein_coding	2	c.-16-14105T>A
7	66114224	A	C	PASS	intergenic_region	MODIFIER	LOC111096800-MIB1	111096800-490521	intergenic_region	111096800-490521		-1	n.66114224A>C
7	66114225	A	T	PASS	intergenic_region	MODIFIER	LOC111096800-MIB1	111096800-490521	intergenic_region	111096800-490521		-1	n.66114225A>T
7	73702416	T	TTG	PASS	intron_variant	MODIFIER	LOC102156870	102156870	transcript	XR_292840.3	pseudogene	7	n.1376+1131_1376+1132insTG
7	73702416	T	TTG	PASS	intron_variant	MODIFIER	LOC102156870	102156870	transcript	XR_002628758.1	pseudogene	7	n.1376+1131_1376+1132insTG
7	73702416	T	TTG	PASS	intron_variant	MODIFIER	LOC102156870	102156870	transcript	XR_002628755.1	pseudogene	7	n.1376+1131_1376+1132insTG
7	73702416	T	TTG	PASS	intron_variant	MODIFIER	LOC102156870	102156870	transcript	XR_002628753.1	pseudogene	7	n.1376+1131_1376+1132insTG
7	73702416	T	TTG	PASS	intron_variant	MODIFIER	LOC102156870	102156870	transcript	XR_002628757.1	pseudogene	7	n.1376+1131_1376+1132insTG
7	73702416	T	TTG	PASS	intron_variant	MODIFIER	LOC102156870	102156870	transcript	XR_002628752.1	pseudogene	7	n.1376+1131_1376+1132insTG
7	73702416	T	TTG	PASS	intron_variant	MODIFIER	LOC102156870	102156870	transcript	XR_002628759.1	pseudogene	5	n.1259+1131_1259+1132insTG
7	73702416	T	TTG	PASS	intron_variant	MODIFIER	LOC102156870	102156870	transcript	XR_002628748.1	pseudogene	7	n.1376+1131_1376+1132insTG
7	73702416	T	TTG	PASS	intron_variant	MODIFIER	LOC102156870	102156870	transcript	XR_002628756.1	pseudogene	7	n.1376+1131_1376+1132insTG
7	73702416	T	TTG	PASS	intron_variant	MODIFIER	LOC102156870	102156870	transcript	XR_002628767.1	pseudogene	4	n.1105-4170_1105-4169insTG
7	73702416	T	TTG	PASS	intron_variant	MODIFIER	LOC102156870	102156870	transcript	XR_002628750.1	pseudogene	7	n.1376+1131_1376+1132insTG
7	73702416	T	TTG	PASS	intron_variant	MODIFIER	LOC102156870	102156870	transcript	XR_002628764.1	pseudogene	5	n.1176+1131_1176+1132insTG
7	73702416	T	TTG	PASS	intron_variant	MODIFIER	LOC102156870	102156870	transcript	XR_002628746.1	pseudogene	7	n.1376+1131_1376+1132insTG
7	73702416	T	TTG	PASS	intron_variant	MODIFIER	LOC102156870	102156870	transcript	XR_002628744.1	pseudogene	7	n.1376+1131_1376+1132insTG
7	73702416	T	TTG	PASS	intron_variant	MODIFIER	LOC102156870	102156870	transcript	XR_002628763.1	pseudogene	6	n.1226+1131_1226+1132insTG
7	73702416	T	TTG	PASS	intron_variant	MODIFIER	LOC102156870	102156870	transcript	XR_002628760.1	pseudogene	6	n.1304+2560_1304+2561insTG
7	73702416	T	TTG	PASS	intron_variant	MODIFIER	LOC102156870	102156870	transcript	XR_002628754.1	pseudogene	7	n.1376+1131_1376+1132insTG
7	73702416	T	TTG	PASS	intron_variant	MODIFIER	LOC102156870	102156870	transcript	XR_002628745.1	pseudogene	7	n.1376+1131_1376+1132insTG
7	73702416	T	TTG	PASS	intron_variant	MODIFIER	LOC102156870	102156870	transcript	XR_002628761.1	pseudogene	5	n.1176+1131_1176+1132insTG
7	73702416	T	TTG	PASS	intron_variant	MODIFIER	LOC102156870	102156870	transcript	XR_002628749.1	pseudogene	7	n.1376+1131_1376+1132insTG
7	73702416	T	TTG	PASS	intron_variant	MODIFIER	LOC102156870	102156870	transcript	XR_002628762.1	pseudogene	6	n.1226+1131_1226+1132insTG
7	73702416	T	TTG	PASS	intron_variant	MODIFIER	LOC102156870	102156870	transcript	XR_002628747.1	pseudogene	7	n.1376+1131_1376+1132insTG
7	73702416	T	TTG	PASS	intron_variant	MODIFIER	LOC102156870	102156870	transcript	XR_002628751.1	pseudogene	7	n.1376+1131_1376+1132insTG
7	73702416	T	TTG	PASS	intron_variant	MODIFIER	LOC102156870	102156870	transcript	XR_002628765.1	pseudogene	6	n.615+1131_615+1132insTG
7	73702416	T	TTG	PASS	intron_variant	MODIFIER	LOC102156870	102156870	transcript	XR_002628766.1	pseudogene	7	n.1376+1131_1376+1132insTG
7	73702416	T	TTG	PASS	intron_variant	MODIFIER	LOC102156870	102156870	transcript	XR_002628768.1	pseudogene	7	n.1376+1131_1376+1132insTG
8	3992078	A	AGGGAGGG	PASS	intron_variant	MODIFIER			transcript	TRANSCRIPT_	protein_coding	86	c.28140+1127215_28140+1127216insGGGAGGG
8	7735917	T	TTTTTTTTTTTTTTAA	PASS	intron_variant	MODIFIER			transcript	TRANSCRIPT_	protein_coding	109	c.32470+720179_32470+720180insTTTTTTTTTTTTTAA
8	26691732	C	G	GATKstd	intron_variant	MODIFIER			transcript	TRANSCRIPT_	protein_coding	239	c.56215+10990C>G
8	26691732	C	G	GATKstd	intron_variant	MODIFIER	SOS2	490682	transcript	XM_005623379.2	protein_coding	3	c.331-809G>C
8	26691732	C	G	GATKstd	intron_variant	MODIFIER	SOS2	490682	transcript	XM_022421982.1	protein_coding	3	c.331-809G>C
8	27740671	A	C	GATKstd	intron_variant	MODIFIER			transcript	TRANSCRIPT_	protein_coding	283	c.64611+108870A>C
8	55721963	TAA	T	PASS	intron_variant	MODIFIER			transcript	TRANSCRIPT_	protein_coding	306	c.69287-17128771_69287-17128770delAA
8	55772510	C	T	PASS	intron_variant	MODIFIER			transcript	TRANSCRIPT_	protein_coding	306	c.69287-17078225C>T
8	55948103	A	C	PASS	intron_variant	MODIFIER			transcript	TRANSCRIPT_	protein_coding	306	c.69287-16902632A>C
8	55948103	A	C	PASS	intron_variant	MODIFIER	LOC102154140	102154140	transcript	XR_002629375.1	pseudogene	2	n.762+2703A>C
8	55948103	A	C	PASS	intron_variant	MODIFIER	LOC102154140	102154140	transcript	XR_001316642.2	pseudogene	2	n.762+2703A>C
8	55963238	T	G	PASS	intron_variant	MODIFIER			transcript	TRANSCRIPT_	protein_coding	306	c.69287-16887497T>G
8	55963238	T	G	PASS	intron_variant	MODIFIER	LOC102154140	102154140	transcript	XR_001316642.2	pseudogene	2	n.763-1629T>G
8	56133066	T	A	PASS	intron_variant	MODIFIER			transcript	TRANSCRIPT_	protein_coding	306	c.69287-16717669T>A
8	56165954	G	A	PASS	intron_variant	MODIFIER			transcript	TRANSCRIPT_	protein_coding	306	c.69287-16684781G>A
8	56165954	G	A	PASS	intron_variant	MODIFIER	LOC111097233	111097233	transcript	XR_002629622.1	pseudogene	2	n.257-6876C>T
8	56171326	G	T	PASS	intron_variant	MODIFIER			transcript	TRANSCRIPT_	protein_coding	306	c.69287-16679409G>T
8	56171326	G	T	PASS	intron_variant	MODIFIER	LOC111097233	111097233	transcript	XR_002629622.1	pseudogene	2	n.257-12248C>A
8	56388481	T	A	PASS	intron_variant	MODIFIER			transcript	TRANSCRIPT_	protein_coding	306	c.69287-16462254T>A
8	56638395	CTTTCT	C	PASS	intron_variant	MODIFIER			transcript	TRANSCRIPT_	protein_coding	306	c.69287-16212339_69287-16212335delTTTCT
8	56774297	TG	T	PASS	intron_variant	MODIFIER			transcript	TRANSCRIPT_	protein_coding	306	c.69287-16076437delG
8	56833922	TA	T	PASS	intron_variant	MODIFIER			transcript	TRANSCRIPT_	protein_coding	306	c.69287-16016812delA
8	56898302	AG	A	PASS	intron_variant	MODIFIER			transcript	TRANSCRIPT_	protein_coding	306	c.69287-15952432delG
8	57189197	A	T	GATKstd	intron_variant	MODIFIER			transcript	TRANSCRIPT_	protein_coding	306	c.69287-15661538A>T
8	57189197	A	T	GATKstd	intron_variant	MODIFIER	LOC106559187	106559187	transcript	XR_002629380.1	pseudogene	3	n.337+22463A>T
8	65313677	C	CCTTTCCCCTCCTCTTCCCTTCCTCCCTCTCCCCTTTCTCCT	PASS	intron_variant	MODIFIER			transcript	TRANSCRIPT_	protein_coding	306	c.69287-7537058_69287-7537057insCTTTCCCCTCCTCTTCCCTTCCTCCCTCTCCCCTTTCTCCT
9	192502	G	A	GATKstd	intron_variant	MODIFIER	CCDC57	607741	transcript	XM_005623974.3	protein_coding	15	c.2342-1153G>A
9	192502	G	A	GATKstd	intron_variant	MODIFIER	CCDC57	607741	transcript	XM_014116225.2	protein_coding	15	c.2342-6803G>A
9	192502	G	A	GATKstd	intron_variant	MODIFIER	CCDC57	607741	transcript	XM_014116223.2	protein_coding	15	c.2342-1153G>A
9	192502	G	A	GATKstd	intron_variant	MODIFIER	CCDC57	607741	transcript	XM_014116222.2	protein_coding	15	c.2342-1153G>A
9	192502	G	A	GATKstd	intron_variant	MODIFIER	CCDC57	607741	transcript	XM_022422611.1	protein_coding	14	c.2171-1153G>A
9	192502	G	A	GATKstd	intron_variant	MODIFIER	CCDC57	607741	transcript	XM_014116224.2	protein_coding	14	c.1913-1153G>A
9	8269573	T	G	GATKstd	upstream_gene_variant	MODIFIER	LOC111097304	111097304	transcript	XR_002629750.1	pseudogene	-1	n.-20A>C
9	8269573	T	G	GATKstd	intergenic_region	MODIFIER	LOC111097304-SOX9	111097304-403464	intergenic_region	111097304-403464		-1	n.8269573T>G
9	13686584	CAGTT	C	PASS	intron_variant	MODIFIER	PRKCA	490904	transcript	XM_022422857.1	protein_coding	11	c.1137+729_1137+732delAACT
9	19215319	T	TTTTTTTTTTTTC	PASS	downstream_gene_variant	MODIFIER	ASB16	490940	transcript	XM_548063.5	protein_coding	-1	c.*3321_*3322insGAAAAAAAAAAA
9	19215319	T	TTTTTTTTTTTTC	PASS	downstream_gene_variant	MODIFIER	ASB16	490940	transcript	XR_002629867.1	pseudogene	-1	n.*3365_*3366insGAAAAAAAAAAA
9	19215319	T	TTTTTTTTTTTTC	PASS	downstream_gene_variant	MODIFIER	ASB16	490940	transcript	XR_002629868.1	pseudogene	-1	n.*3365_*3366insGAAAAAAAAAAA
9	19215319	T	TTTTTTTTTTTTC	PASS	downstream_gene_variant	MODIFIER	ASB16	490940	transcript	XR_002629870.1	pseudogene	-1	n.*3480_*3481insGAAAAAAAAAAA
9	19215319	T	TTTTTTTTTTTTC	PASS	downstream_gene_variant	MODIFIER	ASB16	490940	transcript	XR_002629871.1	pseudogene	-1	n.*3849_*3850insGAAAAAAAAAAA
9	19215319	T	TTTTTTTTTTTTC	PASS	downstream_gene_variant	MODIFIER	ASB16	490940	transcript	XR_002629869.1	pseudogene	-1	n.*3925_*3926insGAAAAAAAAAAA
9	19215319	T	TTTTTTTTTTTTC	PASS	intergenic_region	MODIFIER	TMUB2-ASB16	607070-490940	intergenic_region	607070-490940		-1	n.19215319_19215320insTTTTTTTTTTTC
AAEX03019090.1	170268	A	ATAACAT	PASS	intergenic_region	MODIFIER						-1
AAEX03019443.1	9053	C	A	GATKstd	intergenic_region	MODIFIER						-1
AAEX03019443.1	73705	A	G	GATKstd	intergenic_region	MODIFIER						-1
AAEX03019535.1	79623	G	T	GATKstd	intergenic_region	MODIFIER						-1
AAEX03019535.1	79634	G	T	GATKstd	intergenic_region	MODIFIER						-1
AAEX03019535.1	79637	G	A	GATKstd	intergenic_region	MODIFIER						-1
AAEX03019535.1	79641	G	C	GATKstd	intergenic_region	MODIFIER						-1
AAEX03020963.1	4352	C	A	GATKstd	intergenic_region	MODIFIER						-1
AAEX03020963.1	4366	G	C	GATKstd	intergenic_region	MODIFIER						-1
AAEX03020963.1	5525	T	A	GATKstd	intergenic_region	MODIFIER						-1
AAEX03020963.1	5600	T	G	GATKstd	intergenic_region	MODIFIER						-1
AAEX03020963.1	5615	G	A	GATKstd	intergenic_region	MODIFIER						-1
AAEX03021108.1	2134	C	G	GATKstd	intergenic_region	MODIFIER						-1
AAEX03021187.1	23798	GC	G	PASS	intergenic_region	MODIFIER						-1
AAEX03021458.1	1515	C	A	GATKstd	intergenic_region	MODIFIER						-1
AAEX03021458.1	1516	A	G	GATKstd	intergenic_region	MODIFIER						-1
AAEX03021458.1	4695	G	C	GATKstd	intergenic_region	MODIFIER						-1
AAEX03021737.1	18465	A	T	GATKstd	intergenic_region	MODIFIER						-1
AAEX03022030.1	13082	A	T	GATKstd	intergenic_region	MODIFIER						-1
AAEX03022030.1	13085	C	G	GATKstd	intergenic_region	MODIFIER						-1
AAEX03022030.1	13102	C	T	GATKstd	intergenic_region	MODIFIER						-1
AAEX03022030.1	13159	A	C	PASS	intergenic_region	MODIFIER						-1
AAEX03022081.1	16926	G	T	GATKstd	intergenic_region	MODIFIER						-1
AAEX03022081.1	16929	T	C	GATKstd	intergenic_region	MODIFIER						-1
AAEX03022262.1	14107	G	T	GATKstd	intergenic_region	MODIFIER						-1
AAEX03022277.1	3053	G	A	GATKstd	intergenic_region	MODIFIER						-1
AAEX03022630.1	10178	T	C	GATKstd	intergenic_region	MODIFIER						-1
AAEX03022759.1	13135	C	G	GATKstd	intergenic_region	MODIFIER						-1
AAEX03022785.1	16361	A	G	GATKstd	intergenic_region	MODIFIER						-1
AAEX03022993.1	2842	C	A	GATKstd	intergenic_region	MODIFIER						-1
AAEX03022993.1	2860	G	T	GATKstd	intergenic_region	MODIFIER						-1
AAEX03023114.1	3704	G	T	GATKstd	intergenic_region	MODIFIER						-1
AAEX03023200.1	1451	A	C	GATKstd	intergenic_region	MODIFIER						-1
AAEX03023200.1	1710	G	C	GATKstd	intergenic_region	MODIFIER						-1
AAEX03023200.1	1719	G	A	GATKstd	intergenic_region	MODIFIER						-1
AAEX03023200.1	1753	A	T	GATKstd	intergenic_region	MODIFIER						-1
AAEX03023358.1	9914	G	C	PASS	intergenic_region	MODIFIER						-1
AAEX03023358.1	10518	TG	T	PASS	intergenic_region	MODIFIER						-1
AAEX03023374.1	7613	G	A	PASS	intergenic_region	MODIFIER						-1
AAEX03023374.1	9563	A	T	GATKstd	intergenic_region	MODIFIER						-1
AAEX03023374.1	9592	C	A	GATKstd	intergenic_region	MODIFIER						-1
AAEX03023374.1	9598	A	T	GATKstd	intergenic_region	MODIFIER						-1
AAEX03023431.1	3255	T	C	GATKstd	intergenic_region	MODIFIER						-1
AAEX03023431.1	3297	C	A	GATKstd	intergenic_region	MODIFIER						-1
AAEX03023431.1	3337	C	T	GATKstd	intergenic_region	MODIFIER						-1
AAEX03023452.1	10923	A	G	GATKstd	intergenic_region	MODIFIER						-1
AAEX03023452.1	11008	TTC	T	PASS	intergenic_region	MODIFIER						-1
AAEX03023534.1	756	G	A	GATKstd	intergenic_region	MODIFIER						-1
AAEX03023768.1	3667	C	T	GATKstd	intergenic_region	MODIFIER						-1
AAEX03023788.1	1962	G	A	GATKstd	intergenic_region	MODIFIER						-1
AAEX03023810.1	5028	T	A	GATKstd	intergenic_region	MODIFIER						-1
AAEX03023810.1	5029	C	A	GATKstd	intergenic_region	MODIFIER						-1
AAEX03023810.1	5068	G	T	GATKstd	intergenic_region	MODIFIER						-1
AAEX03023842.1	11078	AG	A	PASS	intergenic_region	MODIFIER						-1
AAEX03023848.1	1764	A	G	GATKstd	intergenic_region	MODIFIER						-1
AAEX03023848.1	1796	C	T	GATKstd	intergenic_region	MODIFIER						-1
AAEX03023848.1	1809	T	C	PASS	intergenic_region	MODIFIER						-1
AAEX03023848.1	6254	A	T	GATKstd	intergenic_region	MODIFIER						-1
AAEX03023848.1	6258	C	T	GATKstd	intergenic_region	MODIFIER						-1
AAEX03023874.1	6129	G	T	GATKstd	intergenic_region	MODIFIER						-1
AAEX03023999.1	1189	T	G	GATKstd	intergenic_region	MODIFIER						-1
AAEX03024034.1	8228	T	C	GATKstd	intergenic_region	MODIFIER						-1
AAEX03024034.1	8232	C	A	GATKstd	intergenic_region	MODIFIER						-1
AAEX03024034.1	8250	T	A	GATKstd	intergenic_region	MODIFIER						-1
AAEX03024034.1	8251	A	G	GATKstd	intergenic_region	MODIFIER						-1
AAEX03024041.1	8780	C	A	GATKstd	intergenic_region	MODIFIER						-1
AAEX03024041.1	8872	TG	T	PASS	intergenic_region	MODIFIER						-1
AAEX03024042.1	1156	C	A	GATKstd	intergenic_region	MODIFIER						-1
AAEX03024042.1	1173	A	T	GATKstd	intergenic_region	MODIFIER						-1
AAEX03024042.1	1183	C	A	GATKstd	intergenic_region	MODIFIER						-1
AAEX03024051.1	6397	AAC	A	PASS	intergenic_region	MODIFIER						-1
AAEX03024051.1	6401	T	TGG	PASS	intergenic_region	MODIFIER						-1
AAEX03024076.1	8321	A	G	PASS	intergenic_region	MODIFIER						-1
AAEX03024093.1	1640	C	A,G	GATKstd	intergenic_region	MODIFIER						-1
AAEX03024093.1	1640	C	A,G	GATKstd	intergenic_region	MODIFIER						-1
AAEX03024093.1	1646	A	C	GATKstd	intergenic_region	MODIFIER						-1
AAEX03024093.1	1651	G	C	GATKstd	intergenic_region	MODIFIER						-1
AAEX03024093.1	1663	A	T	GATKstd	intergenic_region	MODIFIER						-1
AAEX03024093.1	1664	T	G	GATKstd	intergenic_region	MODIFIER						-1
AAEX03024150.1	3496	A	T	GATKstd	intergenic_region	MODIFIER						-1
AAEX03024150.1	3652	G	A	GATKstd	intergenic_region	MODIFIER						-1
AAEX03024225.1	4153	T	A	PASS	intergenic_region	MODIFIER						-1
AAEX03024350.1	3217	C	CT	PASS	intergenic_region	MODIFIER						-1
AAEX03024351.1	5512	A	C	GATKstd	intergenic_region	MODIFIER						-1
AAEX03024354.1	5203	C	T	GATKstd	intergenic_region	MODIFIER						-1
AAEX03024354.1	5207	G	T	GATKstd	intergenic_region	MODIFIER						-1
AAEX03024354.1	5218	G	C	GATKstd	intergenic_region	MODIFIER						-1
AAEX03024354.1	5233	A	G	PASS	intergenic_region	MODIFIER						-1
AAEX03024400.1	7626	T	A	GATKstd	intergenic_region	MODIFIER						-1
AAEX03024400.1	7632	C	T	PASS	intergenic_region	MODIFIER						-1
AAEX03024452.1	5065	C	A	GATKstd	intergenic_region	MODIFIER						-1
AAEX03024452.1	5080	C	T	GATKstd	intergenic_region	MODIFIER						-1
AAEX03024452.1	5091	T	G	PASS	intergenic_region	MODIFIER						-1
AAEX03024461.1	5441	C	A	GATKstd	intergenic_region	MODIFIER						-1
AAEX03024463.1	6754	C	G	GATKstd	intergenic_region	MODIFIER						-1
AAEX03024466.1	461	A	T	GATKstd	intergenic_region	MODIFIER						-1
AAEX03024476.1	5068	C	T	GATKstd	intergenic_region	MODIFIER						-1
AAEX03024476.1	5422	A	T	GATKstd	intergenic_region	MODIFIER						-1
AAEX03024482.1	6762	T	G	GATKstd	intergenic_region	MODIFIER						-1
AAEX03024482.1	6775	G	A	GATKstd	intergenic_region	MODIFIER						-1
AAEX03024482.1	6857	A	G	GATKstd	intergenic_region	MODIFIER						-1
AAEX03024504.1	1686	A	T	GATKstd	intergenic_region	MODIFIER						-1
AAEX03024534.1	4938	G	A	GATKstd	intergenic_region	MODIFIER						-1
AAEX03024534.1	4951	A	C	GATKstd	intergenic_region	MODIFIER						-1
AAEX03024542.1	7598	G	C	GATKstd	intergenic_region	MODIFIER						-1
AAEX03024542.1	7600	C	G	GATKstd	intergenic_region	MODIFIER						-1
AAEX03024542.1	7611	G	T	GATKstd	intergenic_region	MODIFIER						-1
AAEX03024542.1	7617	T	C	GATKstd	intergenic_region	MODIFIER						-1
AAEX03024547.1	6571	C	A	GATKstd	intergenic_region	MODIFIER						-1
AAEX03024547.1	6572	C	T	GATKstd	intergenic_region	MODIFIER						-1
AAEX03024588.1	4534	C	T	GATKstd	intergenic_region	MODIFIER						-1
AAEX03024589.1	1066	C	A	GATKstd	intergenic_region	MODIFIER						-1
AAEX03024649.1	4688	ATAC	A	PASS	intergenic_region	MODIFIER						-1
AAEX03024649.1	4694	CA	C	PASS	intergenic_region	MODIFIER						-1
AAEX03024651.1	5584	C	G	PASS	intergenic_region	MODIFIER						-1
AAEX03024651.1	5630	G	A	GATKstd	intergenic_region	MODIFIER						-1
AAEX03024651.1	5642	T	A	GATKstd	intergenic_region	MODIFIER						-1
AAEX03024720.1	5096	C	G	GATKstd	intergenic_region	MODIFIER						-1
AAEX03024734.1	7655	T	A	GATKstd	intergenic_region	MODIFIER						-1
AAEX03024737.1	4325	G	C	PASS	intergenic_region	MODIFIER						-1
AAEX03024737.1	4417	G	T	GATKstd	intergenic_region	MODIFIER						-1
AAEX03024746.1	3823	A	T	GATKstd	intergenic_region	MODIFIER						-1
AAEX03024746.1	3832	G	T	PASS	intergenic_region	MODIFIER						-1
AAEX03024788.1	186	T	A	GATKstd	intergenic_region	MODIFIER						-1
AAEX03024838.1	5268	T	C	GATKstd	intergenic_region	MODIFIER						-1
AAEX03024845.1	4604	G	T	GATKstd	intergenic_region	MODIFIER						-1
AAEX03024845.1	4605	C	T	GATKstd	intergenic_region	MODIFIER						-1
AAEX03024845.1	5366	G	A	GATKstd	intergenic_region	MODIFIER						-1
AAEX03024861.1	4760	G	C	GATKstd	intergenic_region	MODIFIER						-1
AAEX03024889.1	1664	C	T	GATKstd	intergenic_region	MODIFIER						-1
AAEX03024919.1	5679	C	G	GATKstd	intergenic_region	MODIFIER						-1
AAEX03024919.1	5686	C	A	GATKstd	intergenic_region	MODIFIER						-1
AAEX03024922.1	2009	TGATAC	T	PASS	intergenic_region	MODIFIER						-1
AAEX03024953.1	5384	TA	T	PASS	intergenic_region	MODIFIER						-1
AAEX03024958.1	717	G	A	GATKstd	intergenic_region	MODIFIER						-1
AAEX03024958.1	722	C	G	GATKstd	intergenic_region	MODIFIER						-1
AAEX03024978.1	543	C	T	GATKstd	intergenic_region	MODIFIER						-1
AAEX03024980.1	871	C	A	GATKstd	intergenic_region	MODIFIER						-1
AAEX03025081.1	4632	C	CT	PASS	intergenic_region	MODIFIER						-1
AAEX03025186.1	5429	T	G	GATKstd	intergenic_region	MODIFIER						-1
AAEX03025199.1	2297	T	G	GATKstd	intergenic_region	MODIFIER						-1
AAEX03025246.1	1402	C	T	GATKstd	intergenic_region	MODIFIER						-1
AAEX03025255.1	2504	G	C	GATKstd	intergenic_region	MODIFIER						-1
AAEX03025261.1	4749	A	T	GATKstd	intergenic_region	MODIFIER						-1
AAEX03025261.1	4750	C	A	GATKstd	intergenic_region	MODIFIER						-1
AAEX03025262.1	3737	C	G	GATKstd	intergenic_region	MODIFIER						-1
AAEX03025348.1	2244	G	T	PASS	intergenic_region	MODIFIER						-1
AAEX03025410.1	1417	TAGA	T	PASS	intergenic_region	MODIFIER						-1
AAEX03025410.1	1425	G	GCC	PASS	intergenic_region	MODIFIER						-1
AAEX03025464.1	3062	G	T	GATKstd	intergenic_region	MODIFIER						-1
AAEX03025464.1	3082	C	T	GATKstd	intergenic_region	MODIFIER						-1
AAEX03025490.1	3321	C	T	GATKstd	intergenic_region	MODIFIER						-1
AAEX03025492.1	2118	C	G	GATKstd	intergenic_region	MODIFIER						-1
AAEX03025492.1	3178	C	A	GATKstd	intergenic_region	MODIFIER						-1
AAEX03025492.1	3181	C	T	GATKstd	intergenic_region	MODIFIER						-1
AAEX03025498.1	4562	A	G	GATKstd	intergenic_region	MODIFIER						-1
AAEX03025498.1	5208	C	A	GATKstd	intergenic_region	MODIFIER						-1
AAEX03025524.1	4009	GGAGCGACGGACGC	G	PASS	upstream_gene_variant	MODIFIER	LOC111095109	111095109	transcript	XR_002624784.1	pseudogene	-1	n.-1499_-1487delGCGTCCGTCGCTC
AAEX03025524.1	4009	GGAGCGACGGACGC	G	PASS	downstream_gene_variant	MODIFIER	LOC100683345	100683345	transcript	XR_297040.3	pseudogene	-1	n.*2621_*2633delGAGCGACGGACGC
AAEX03025524.1	4009	GGAGCGACGGACGC	G	PASS	intergenic_region	MODIFIER	LOC111095109-CHR_END	111095109-CHR_END	intergenic_region	111095109-CHR_END		-1	n.4010_4022delGAGCGACGGACGC
AAEX03025552.1	4363	T	C	GATKstd	intergenic_region	MODIFIER						-1
AAEX03025601.1	1477	G	T	GATKstd	intergenic_region	MODIFIER						-1
AAEX03025610.1	4282	C	G	GATKstd	intergenic_region	MODIFIER						-1
AAEX03025652.1	3011	A	G	GATKstd	intergenic_region	MODIFIER						-1
AAEX03025652.1	3013	G	T	GATKstd	intergenic_region	MODIFIER						-1
AAEX03025675.1	1876	G	A	GATKstd	intergenic_region	MODIFIER						-1
AAEX03025720.1	4208	G	C	GATKstd	intergenic_region	MODIFIER						-1
AAEX03025769.1	721	C	T	GATKstd	intergenic_region	MODIFIER						-1
AAEX03025769.1	723	C	G	GATKstd	intergenic_region	MODIFIER						-1
AAEX03025769.1	726	C	CA	PASS	intergenic_region	MODIFIER						-1
AAEX03025783.1	1855	G	T	GATKstd	intergenic_region	MODIFIER						-1
AAEX03025785.1	4466	G	C	GATKstd	intergenic_region	MODIFIER						-1
AAEX03025785.1	4468	A	G	GATKstd	intergenic_region	MODIFIER						-1
AAEX03025785.1	4720	T	A	GATKstd	intergenic_region	MODIFIER						-1
AAEX03025854.1	3079	G	C	GATKstd	intergenic_region	MODIFIER						-1
AAEX03025861.1	2125	A	G	GATKstd	intergenic_region	MODIFIER						-1
AAEX03025861.1	2201	A	G	GATKstd	intergenic_region	MODIFIER						-1
AAEX03025862.1	2091	C	G	GATKstd	intergenic_region	MODIFIER						-1
[truncated: 278 more rows]

## Sheet: IT390_Heterozygous_Variants
Table S2. Private variants in the genome of the affected Irish Terrier IT390. Variants were called with respect to the CanFam 3.1 reference genome assembly. The functional annotation of the variants is based on the NCBI annotation release 105. The table is in "1 effect per line" format. Thus, one variant will be listed several times, if multiple effects, e.g. on different alternative transcripts,…
#CHROM	POS	REF	ALT	FILTER	EFFECT	IMPACT	GENE	GENEID	FEATURE	FEATUREID	BIOTYPE	RANK	HGVS_C	HGVS_P
10	55239	G	A	GATKstd	downstream_gene_variant	MODIFIER	LOC100685830	100685830	transcript	XM_014117107.1	protein_coding	-1	c.*3701G>A
10	55239	G	A	GATKstd	intergenic_region	MODIFIER	LOC100685830-LOC100682740	100685830-100682740	intergenic_region	100685830-100682740		-1	n.55239G>A
10	459127	A	G	GATKstd	intron_variant	MODIFIER	ESYT1	474397	transcript	XM_022424872.1	protein_coding	19	c.2863-681A>G
10	1064178	C	T	GATKstd	upstream_gene_variant	MODIFIER	LOC100687241	100687241	transcript	100687241	pseudogene	-1	n.-2826C>T
10	1064178	C	T	GATKstd	intergenic_region	MODIFIER	HSD17B6-LOC100687241	481118-100687241	intergenic_region	481118-100687241		-1	n.1064178C>T
10	2403164	ACCTTT	A	PASS	intergenic_region	MODIFIER	ATP23-LOC111097578	474422-111097578	intergenic_region	474422-111097578		-1	n.2403165_2403169delCCTTT
10	5329754	A	AC	PASS	intergenic_region	MODIFIER	FAM19A2-USP15	607990-474424	intergenic_region	607990-474424		-1	n.5329754_5329755insC
10	5329768	G	C	GATKstd	intergenic_region	MODIFIER	FAM19A2-USP15	607990-474424	intergenic_region	607990-474424		-1	n.5329768G>C
10	5329773	C	T	GATKstd	intergenic_region	MODIFIER	FAM19A2-USP15	607990-474424	intergenic_region	607990-474424		-1	n.5329773C>T
10	5759574	C	T	GATKstd	intron_variant	MODIFIER	MON2	481141	transcript	XM_005625572.3	protein_coding	31	c.4524-1098C>T
10	5759574	C	T	GATKstd	intron_variant	MODIFIER	MON2	481141	transcript	XM_005625574.3	protein_coding	29	c.4503-1098C>T
10	5759574	C	T	GATKstd	intron_variant	MODIFIER	MON2	481141	transcript	XM_855513.5	protein_coding	30	c.4521-1098C>T
10	5759574	C	T	GATKstd	intron_variant	MODIFIER	MON2	481141	transcript	XM_005625573.3	protein_coding	30	c.4506-1098C>T
10	5759574	C	T	GATKstd	intron_variant	MODIFIER	MON2	481141	transcript	XM_005625576.2	protein_coding	31	c.4308-1098C>T
10	6415198	C	T	GATKstd	intergenic_region	MODIFIER	LOC111097582-LOC102155476	111097582-102155476	intergenic_region	111097582-102155476		-1	n.6415198C>T
10	6415200	G	T	GATKstd	intergenic_region	MODIFIER	LOC111097582-LOC102155476	111097582-102155476	intergenic_region	111097582-102155476		-1	n.6415200G>T
10	9252953	GGACC	G	PASS	intergenic_region	MODIFIER	GRIP1-LOC100684551	474434-100684551	intergenic_region	474434-100684551		-1	n.9252954_9252957delGACC
10	10968543	TTTTTG	T	PASS	downstream_gene_variant	MODIFIER	CPM	100685525	transcript	XM_022424880.1	protein_coding	-1	c.*3219_*3223delCAAAA
10	10968543	TTTTTG	T	PASS	intergenic_region	MODIFIER	MDM2-CPM	403693-100685525	intergenic_region	403693-100685525		-1	n.10968544_10968548delTTTTG
10	11111019	T	A	GATKstd	intergenic_region	MODIFIER	CPM-LOC102153043	100685525-102153043	intergenic_region	100685525-102153043		-1	n.11111019T>A
10	11609829	A	G	PASS	intron_variant	MODIFIER	BEST3	481158	transcript	XM_538279.6	protein_coding	9	c.1100+2675T>C
10	11609829	A	G	PASS	intron_variant	MODIFIER	BEST3	481158	transcript	XM_005625618.3	protein_coding	7	c.782+2675T>C
10	11619247	G	A	PASS	intron_variant	MODIFIER	BEST3	481158	transcript	XM_538279.6	protein_coding	5	c.636+300C>T
10	11619247	G	A	PASS	intron_variant	MODIFIER	BEST3	481158	transcript	XM_005625618.3	protein_coding	3	c.318+300C>T
10	11672919	C	A	GATKstd	upstream_gene_variant	MODIFIER	RAB3IP	481159	transcript	XM_538280.5	protein_coding	-1	c.-14904C>A
10	11672919	C	A	GATKstd	upstream_gene_variant	MODIFIER	RAB3IP	481159	transcript	XM_005625622.3	protein_coding	-1	c.-14904C>A
10	11672919	C	A	GATKstd	upstream_gene_variant	MODIFIER	RAB3IP	481159	transcript	XM_005625621.2	protein_coding	-1	c.-14904C>A
10	11672919	C	A	GATKstd	intergenic_region	MODIFIER	BEST3-RAB3IP	481158-481159	intergenic_region	481158-481159		-1	n.11672919C>A
10	11866729	C	T	GATKstd	intergenic_region	MODIFIER	MYRFL-LOC100686334	102153182-100686334	intergenic_region	102153182-100686334		-1	n.11866729C>T
10	12233703	T	A	PASS	intron_variant	MODIFIER	KCNMB4	474447	transcript	XM_022424213.1	protein_coding	1	c.521-11801T>A
10	12233703	T	A	PASS	intron_variant	MODIFIER	KCNMB4	474447	transcript	XR_002630473.1	pseudogene	1	n.151-11801T>A
10	12233703	T	A	PASS	intron_variant	MODIFIER	KCNMB4	474447	transcript	XR_002630474.1	pseudogene	1	n.145-11801T>A
10	13527178	AGCTATGGGC	A	GATKIndelStd	downstream_gene_variant	MODIFIER	TPH2	481165	transcript	NM_001197120.1	protein_coding	-1	c.*642_*650delGCTATGGGC
10	13527178	AGCTATGGGC	A	GATKIndelStd	intergenic_region	MODIFIER	TPH2-LOC111097601	481165-111097601	intergenic_region	481165-111097601		-1	n.13527179_13527187delGCTATGGGC
10	13527187	C	CAAAAAAAAA	GATKIndelStd	downstream_gene_variant	MODIFIER	TPH2	481165	transcript	NM_001197120.1	protein_coding	-1	c.*650_*651insAAAAAAAAA
10	13527187	C	CAAAAAAAAA	GATKIndelStd	intergenic_region	MODIFIER	TPH2-LOC111097601	481165-111097601	intergenic_region	481165-111097601		-1	n.13527187_13527188insAAAAAAAAA
10	15293010	A	C	GATKstd	intergenic_region	MODIFIER	LOC111097827-LOC111097603	111097827-111097603	intergenic_region	111097827-111097603		-1	n.15293010A>C
10	16529381	T	C	GATKstd	intergenic_region	MODIFIER	LOC100685346-RABL2B	100685346-100685429	intergenic_region	100685346-100685429		-1	n.16529381T>C
10	16529385	A	T	GATKstd	intergenic_region	MODIFIER	LOC100685346-RABL2B	100685346-100685429	intergenic_region	100685346-100685429		-1	n.16529385A>T
10	17668183	C	T	GATKstd	intergenic_region	MODIFIER	LOC106559363-FAM19A5	106559363-608054	intergenic_region	106559363-608054		-1	n.17668183C>T
10	17692438	G	A	GATKstd	intergenic_region	MODIFIER	LOC106559363-FAM19A5	106559363-608054	intergenic_region	106559363-608054		-1	n.17692438G>A
10	17859099	G	A	GATKstd	intergenic_region	MODIFIER	LOC106559363-FAM19A5	106559363-608054	intergenic_region	106559363-608054		-1	n.17859099G>A
10	18130978	C	T	GATKstd	downstream_gene_variant	MODIFIER	FAM19A5	608054	transcript	XR_002630505.1	pseudogene	-1	n.*3973G>A
10	18130978	C	T	GATKstd	downstream_gene_variant	MODIFIER	FAM19A5	608054	transcript	XR_002630506.1	pseudogene	-1	n.*3973G>A
10	18130978	C	T	GATKstd	downstream_gene_variant	MODIFIER	FAM19A5	608054	transcript	XR_002630507.1	pseudogene	-1	n.*3973G>A
10	18130978	C	T	GATKstd	downstream_gene_variant	MODIFIER	FAM19A5	608054	transcript	XM_022424282.1	protein_coding	-1	c.*6303G>A
10	18130978	C	T	GATKstd	intron_variant	MODIFIER	FAM19A5	608054	transcript	XM_022424281.1	protein_coding	2	c.182-11046G>A
10	18130978	C	T	GATKstd	intron_variant	MODIFIER	FAM19A5	608054	transcript	XM_005625743.3	protein_coding	2	c.182-11046G>A
10	18278034	C	T	PASS	intergenic_region	MODIFIER	LOC102157395-LOC102151191	102157395-102151191	intergenic_region	102157395-102151191		-1	n.18278034C>T
10	18290960	G	A	PASS	intergenic_region	MODIFIER	LOC102157395-LOC102151191	102157395-102151191	intergenic_region	102157395-102151191		-1	n.18290960G>A
10	18559703	C	A	PASS	intergenic_region	MODIFIER	LOC100686419-LOC102154327	100686419-102154327	intergenic_region	100686419-102154327		-1	n.18559703C>A
10	19158559	G	A	GATKstd	intergenic_region	MODIFIER	LOC102154327-TBC1D22A	102154327-474462	intergenic_region	102154327-474462		-1	n.19158559G>A
10	19710765	G	A	GATKstd	intron_variant	MODIFIER	CELSR1	481203	transcript	XM_022424295.1	protein_coding	3	c.3085+58G>A
10	19877770	C	T	GATKstd	intron_variant	MODIFIER	GTSE1	608855	transcript	XM_845993.5	protein_coding	2	c.23-1258G>A
10	20609815	T	G	GATKstd	intergenic_region	MODIFIER	FBLN1-RIBC2	474468-474469	intergenic_region	474468-474469		-1	n.20609815T>G
10	21466381	C	T	GATKstd	intron_variant	MODIFIER	KIAA1644	100682848	transcript	XM_003431483.4	protein_coding	3	c.282-2115C>T
10	21466381	C	T	GATKstd	intron_variant	MODIFIER	KIAA1644	100682848	transcript	XR_002630526.1	pseudogene	3	n.434-2115C>T
10	21466381	C	T	GATKstd	intron_variant	MODIFIER	KIAA1644	100682848	transcript	XM_022424326.1	protein_coding	3	c.282-2115C>T
10	21649231	CCTCT	C	PASS	intergenic_region	MODIFIER	PARVB-LOC111097628	481215-111097628	intergenic_region	481215-111097628		-1	n.21649232_21649235delCTCT
10	21657753	AGAATGAGT	A	PASS	downstream_gene_variant	MODIFIER	LOC111097628	111097628	transcript	XR_002630528.1	pseudogene	-1	n.*4630_*4637delACTCATTC
10	21657753	AGAATGAGT	A	PASS	intergenic_region	MODIFIER	PARVB-LOC111097628	481215-111097628	intergenic_region	481215-111097628		-1	n.21657754_21657761delGAATGAGT
10	21695362	T	C	GATKstd	intron_variant	MODIFIER	SAMM50	474473	transcript	XM_531702.6	protein_coding	3	c.234+1023A>G
10	21707746	G	GA	PASS	upstream_gene_variant	MODIFIER	SAMM50	474473	transcript	XM_531702.6	protein_coding	-1	c.-4080_-4079insT
10	21707746	G	GA	PASS	downstream_gene_variant	MODIFIER	PNPLA3	609368	transcript	XM_022424299.1	protein_coding	-1	c.*1493_*1494insT
10	21707746	G	GA	PASS	intergenic_region	MODIFIER	SAMM50-PNPLA3	474473-609368	intergenic_region	474473-609368		-1	n.21707746_21707747insA
10	21707748	G	C	PASS	upstream_gene_variant	MODIFIER	SAMM50	474473	transcript	XM_531702.6	protein_coding	-1	c.-4081C>G
10	21707748	G	C	PASS	downstream_gene_variant	MODIFIER	PNPLA3	609368	transcript	XM_022424299.1	protein_coding	-1	c.*1492C>G
10	21707748	G	C	PASS	intergenic_region	MODIFIER	SAMM50-PNPLA3	474473-609368	intergenic_region	474473-609368		-1	n.21707748G>C
10	21713267	G	A	PASS	intron_variant	MODIFIER	PNPLA3	609368	transcript	XM_022424299.1	protein_coding	5	c.758-435C>T
10	21765501	G	T	PASS	intron_variant	MODIFIER	PNPLA5	481216	transcript	XM_538337.4	protein_coding	4	c.703-272G>T
10	21765501	G	T	PASS	intron_variant	MODIFIER	PNPLA5	481216	transcript	XM_005625768.2	protein_coding	3	c.493-272G>T
10	21765501	G	T	PASS	intron_variant	MODIFIER	PNPLA5	481216	transcript	XM_005625766.2	protein_coding	4	c.703-272G>T
10	21765501	G	T	PASS	intron_variant	MODIFIER	PNPLA5	481216	transcript	XM_005625767.2	protein_coding	4	c.703-272G>T
10	21807724	G	A	PASS	intron_variant	MODIFIER	SULT4A1	609410	transcript	XM_846659.5	protein_coding	5	c.603+2425G>A
10	21807724	G	A	PASS	intron_variant	MODIFIER	SULT4A1	609410	transcript	XR_002630529.1	pseudogene	5	n.650+2425G>A
10	21809506	C	T	PASS	intron_variant	MODIFIER	SULT4A1	609410	transcript	XM_846659.5	protein_coding	5	c.604-1185C>T
10	21809506	C	T	PASS	intron_variant	MODIFIER	SULT4A1	609410	transcript	XR_002630529.1	pseudogene	5	n.651-1185C>T
10	21856616	G	A	GATKstd	intron_variant	MODIFIER	EFCAB6	481218	transcript	XM_022424329.1	protein_coding	2	c.143-611G>A
10	21856616	G	A	GATKstd	intron_variant	MODIFIER	EFCAB6	481218	transcript	XM_014117294.2	protein_coding	4	c.221-611G>A
10	21856616	G	A	GATKstd	intron_variant	MODIFIER	EFCAB6	481218	transcript	XM_022424332.1	protein_coding	4	c.221-611G>A
10	21856616	G	A	GATKstd	intron_variant	MODIFIER	EFCAB6	481218	transcript	XM_538339.6	protein_coding	3	c.143-611G>A
10	21856616	G	A	GATKstd	intron_variant	MODIFIER	EFCAB6	481218	transcript	XM_022424330.1	protein_coding	2	c.143-611G>A
10	21856616	G	A	GATKstd	intron_variant	MODIFIER	EFCAB6	481218	transcript	XM_022424331.1	protein_coding	2	c.143-611G>A
10	21856616	G	A	GATKstd	intron_variant	MODIFIER	EFCAB6	481218	transcript	XM_014117295.2	protein_coding	1	c.-61+7017G>A
10	21860298	C	T	GATKstd	intron_variant	MODIFIER	EFCAB6	481218	transcript	XM_022424329.1	protein_coding	3	c.354+2860C>T
10	21860298	C	T	GATKstd	intron_variant	MODIFIER	EFCAB6	481218	transcript	XM_014117294.2	protein_coding	5	c.432+2860C>T
10	21860298	C	T	GATKstd	intron_variant	MODIFIER	EFCAB6	481218	transcript	XM_022424332.1	protein_coding	5	c.432+2860C>T
10	21860298	C	T	GATKstd	intron_variant	MODIFIER	EFCAB6	481218	transcript	XM_538339.6	protein_coding	4	c.354+2860C>T
10	21860298	C	T	GATKstd	intron_variant	MODIFIER	EFCAB6	481218	transcript	XM_022424330.1	protein_coding	3	c.354+2860C>T
10	21860298	C	T	GATKstd	intron_variant	MODIFIER	EFCAB6	481218	transcript	XM_022424331.1	protein_coding	3	c.354+2860C>T
10	21860298	C	T	GATKstd	intron_variant	MODIFIER	EFCAB6	481218	transcript	XM_014117295.2	protein_coding	1	c.-60-7104C>T
10	21914413	C	T	GATKstd	intron_variant	MODIFIER	EFCAB6	481218	transcript	XM_022424329.1	protein_coding	9	c.1034+1824C>T
10	21914413	C	T	GATKstd	intron_variant	MODIFIER	EFCAB6	481218	transcript	XM_014117294.2	protein_coding	11	c.1112+1824C>T
10	21914413	C	T	GATKstd	intron_variant	MODIFIER	EFCAB6	481218	transcript	XM_022424332.1	protein_coding	11	c.1112+1824C>T
10	21914413	C	T	GATKstd	intron_variant	MODIFIER	EFCAB6	481218	transcript	XM_538339.6	protein_coding	10	c.1034+1824C>T
10	21914413	C	T	GATKstd	intron_variant	MODIFIER	EFCAB6	481218	transcript	XM_022424330.1	protein_coding	9	c.1034+1824C>T
10	21914413	C	T	GATKstd	intron_variant	MODIFIER	EFCAB6	481218	transcript	XM_022424331.1	protein_coding	7	c.878+1824C>T
10	21914413	C	T	GATKstd	intron_variant	MODIFIER	EFCAB6	481218	transcript	XM_014117295.2	protein_coding	7	c.620+1824C>T
10	21914413	C	T	GATKstd	intron_variant	MODIFIER	EFCAB6	481218	transcript	XM_022424333.1	protein_coding	5	c.410+1824C>T
10	25133665	C	T	PASS	downstream_gene_variant	MODIFIER	LOC111097644	111097644	transcript	XR_002630566.1	pseudogene	-1	n.*854C>T
10	25133665	C	T	PASS	intron_variant	MODIFIER	FAM83F	474500	transcript	XM_531728.5	protein_coding	1	c.492+6833G>A
10	25356204	C	T	GATKstd	intergenic_region	MODIFIER	ENTHD1-LOC111097646	481242-111097646	intergenic_region	481242-111097646		-1	n.25356204C>T
10	25423980	T	A	PASS	intron_variant	MODIFIER	CACNA1I	481243	transcript	XM_022424301.1	protein_coding	6	c.741-1010A>T
10	25423982	T	A	GATKstd	intron_variant	MODIFIER	CACNA1I	481243	transcript	XM_022424301.1	protein_coding	6	c.741-1012A>T
10	26433920	TTTAA	T	PASS	intron_variant	MODIFIER	TMEM184B	481254	transcript	XM_005625888.3	protein_coding	1	c.-58+9832_-58+9835delTTAA
10	26433920	TTTAA	T	PASS	intron_variant	MODIFIER	TMEM184B	481254	transcript	XM_538375.6	protein_coding	1	c.-58+9832_-58+9835delTTAA
10	29291122	A	T	GATKstd	intron_variant	MODIFIER	LOC102153408	102153408	transcript	XR_002630624.1	pseudogene	2	n.711-1957A>T
10	29291122	A	T	GATKstd	intron_variant	MODIFIER	LOC102153408	102153408	transcript	XR_002630623.1	pseudogene	2	n.707-1957A>T
10	29291122	A	T	GATKstd	intron_variant	MODIFIER	LOC102153408	102153408	transcript	XR_002630622.1	pseudogene	2	n.651-1957A>T
10	29604220	T	A	PASS	intergenic_region	MODIFIER	LOC102153408-LOC111097663	102153408-111097663	intergenic_region	102153408-111097663		-1	n.29604220T>A
10	29861618	C	G	GATKstd	intergenic_region	MODIFIER	LOC111097836-LARGE1	111097836-474521	intergenic_region	111097836-474521		-1	n.29861618C>G
10	30585130	A	AGGG	PASS	intron_variant	MODIFIER	SYN3	481290	transcript	XM_005625932.3	protein_coding	4	c.461+25580_461+25581insGGG
10	30585130	A	AGGG	PASS	intron_variant	MODIFIER	LOC102154205	102154205	transcript	XR_293367.2	pseudogene	3	n.778-270_778-269insCCC
10	30585130	A	AGGG	PASS	intron_variant	MODIFIER	SYN3	481290	transcript	XM_022424500.1	protein_coding	5	c.461+25580_461+25581insGGG
10	30585130	A	AGGG	PASS	intron_variant	MODIFIER	SYN3	481290	transcript	XM_538411.5	protein_coding	4	c.461+25580_461+25581insGGG
10	30585130	A	AGGG	PASS	intron_variant	MODIFIER	LOC102154205	102154205	transcript	XR_002630635.1	pseudogene	3	n.577-270_577-269insCCC
10	30585131	A	ATCCCTGGATGGCGCAGGGGTTTGGCGCCTG	PASS	intron_variant	MODIFIER	SYN3	481290	transcript	XM_005625932.3	protein_coding	4	c.461+25581_461+25582insTCCCTGGATGGCGCAGGGGTTTGGCGCCTG
10	30585131	A	ATCCCTGGATGGCGCAGGGGTTTGGCGCCTG	PASS	intron_variant	MODIFIER	LOC102154205	102154205	transcript	XR_293367.2	pseudogene	3	n.778-271_778-270insCAGGCGCCAAACCCCTGCGCCATCCAGGGA
10	30585131	A	ATCCCTGGATGGCGCAGGGGTTTGGCGCCTG	PASS	intron_variant	MODIFIER	SYN3	481290	transcript	XM_022424500.1	protein_coding	5	c.461+25581_461+25582insTCCCTGGATGGCGCAGGGGTTTGGCGCCTG
10	30585131	A	ATCCCTGGATGGCGCAGGGGTTTGGCGCCTG	PASS	intron_variant	MODIFIER	SYN3	481290	transcript	XM_538411.5	protein_coding	4	c.461+25581_461+25582insTCCCTGGATGGCGCAGGGGTTTGGCGCCTG
10	30585131	A	ATCCCTGGATGGCGCAGGGGTTTGGCGCCTG	PASS	intron_variant	MODIFIER	LOC102154205	102154205	transcript	XR_002630635.1	pseudogene	3	n.577-271_577-270insCAGGCGCCAAACCCCTGCGCCATCCAGGGA
10	31847848	G	T	PASS	intergenic_region	MODIFIER	TMEM263-LOC111097674	610769-111097674	intergenic_region	610769-111097674		-1	n.31847848G>T
10	32292531	TGCACACAA	T	PASS	intron_variant	MODIFIER	POLR3B	474531	transcript	XM_531760.6	protein_coding	7	c.497-648_497-641delTTGTGTGC
10	32292531	TGCACACAA	T	PASS	intron_variant	MODIFIER	POLR3B	474531	transcript	XM_005625951.3	protein_coding	7	c.323-648_323-641delTTGTGTGC
10	32292531	TGCACACAA	T	PASS	intron_variant	MODIFIER	POLR3B	474531	transcript	XM_005625950.3	protein_coding	7	c.497-648_497-641delTTGTGTGC
10	32292531	TGCACACAA	T	PASS	intron_variant	MODIFIER	POLR3B	474531	transcript	XM_022424517.1	protein_coding	7	c.497-648_497-641delTTGTGTGC
10	32292539	A	ATTTTTTTT	PASS	intron_variant	MODIFIER	POLR3B	474531	transcript	XM_531760.6	protein_coding	7	c.497-649_497-648insAAAAAAAA
10	32292539	A	ATTTTTTTT	PASS	intron_variant	MODIFIER	POLR3B	474531	transcript	XM_005625951.3	protein_coding	7	c.323-649_323-648insAAAAAAAA
10	32292539	A	ATTTTTTTT	PASS	intron_variant	MODIFIER	POLR3B	474531	transcript	XM_005625950.3	protein_coding	7	c.497-649_497-648insAAAAAAAA
10	32292539	A	ATTTTTTTT	PASS	intron_variant	MODIFIER	POLR3B	474531	transcript	XM_022424517.1	protein_coding	7	c.497-649_497-648insAAAAAAAA
10	34326004	G	GT	PASS	intergenic_region	MODIFIER	SEPT10-LOC106559442	100688206-106559442	intergenic_region	100688206-106559442		-1	n.34326004_34326005insT
10	34655790	C	T	GATKstd	intron_variant	MODIFIER	SH3RF3	481304	transcript	XM_005625970.2	protein_coding	1	c.585+74020G>A
10	34655790	C	T	GATKstd	intron_variant	MODIFIER	SH3RF3	481304	transcript	XM_022424534.1	protein_coding	1	c.585+74020G>A
10	34978926	A	C	GATKstd	intron_variant	MODIFIER	CCDC138	610991	transcript	XM_014117398.2	protein_coding	13	c.1706-154T>G
10	34978926	A	C	GATKstd	intron_variant	MODIFIER	CCDC138	610991	transcript	XM_014117403.2	protein_coding	7	c.809-154T>G
10	34978926	A	C	GATKstd	intron_variant	MODIFIER	CCDC138	610991	transcript	XM_014117401.2	protein_coding	8	c.809-154T>G
10	34978926	A	C	GATKstd	intron_variant	MODIFIER	CCDC138	610991	transcript	XM_014117400.2	protein_coding	13	c.809-154T>G
10	34978926	A	C	GATKstd	intron_variant	MODIFIER	CCDC138	610991	transcript	XM_022424536.1	protein_coding	12	c.1547-154T>G
10	34978926	A	C	GATKstd	intron_variant	MODIFIER	CCDC138	610991	transcript	XM_022424537.1	protein_coding	12	c.1541-154T>G
10	34978926	A	C	GATKstd	intron_variant	MODIFIER	CCDC138	610991	transcript	XM_848591.4	protein_coding	13	c.1703-154T>G
10	34978926	A	C	GATKstd	intron_variant	MODIFIER	CCDC138	610991	transcript	XM_022424539.1	protein_coding	10	c.1216-154T>G
10	35221413	A	T	PASS	intron_variant	MODIFIER	LIMS1	474540	transcript	XM_005625978.3	protein_coding	1	c.182+609T>A
10	35221413	A	T	PASS	intron_variant	MODIFIER	LIMS1	474540	transcript	XM_857845.5	protein_coding	1	c.182+609T>A
10	35221413	A	T	PASS	intron_variant	MODIFIER	LIMS1	474540	transcript	XM_003431515.4	protein_coding	1	c.108-3877T>A
10	35221413	A	T	PASS	intron_variant	MODIFIER	LIMS1	474540	transcript	XM_005625981.3	protein_coding	1	c.-4-3877T>A
10	35221413	A	T	PASS	intron_variant	MODIFIER	LIMS1	474540	transcript	XM_022424540.1	protein_coding	1	c.-4-3877T>A
10	35221413	A	T	PASS	intron_variant	MODIFIER	LIMS1	474540	transcript	XM_005625979.3	protein_coding	1	c.108-3877T>A
10	35221413	A	T	PASS	intron_variant	MODIFIER	LIMS1	474540	transcript	XM_005625980.3	protein_coding	1	c.-4-3877T>A
10	35221413	A	T	PASS	intron_variant	MODIFIER	LIMS1	474540	transcript	XM_005625982.3	protein_coding	1	c.-4-3877T>A
10	35221413	A	T	PASS	intron_variant	MODIFIER	LIMS1	474540	transcript	XM_003431514.3	protein_coding	1	c.33-3877T>A
10	35309741	C	T	GATKstd	intron_variant	MODIFIER	LIMS1	474540	transcript	XM_003431514.3	protein_coding	1	c.32+29202G>A
10	35334163	G	A	GATKstd	intron_variant	MODIFIER	LIMS1	474540	transcript	XM_003431514.3	protein_coding	1	c.32+4780C>T
10	35413102	T	G	GATKstd	intron_variant	MODIFIER	GCC2	474541	transcript	XM_531770.6	protein_coding	9	c.3219+3005A>C
10	35472267	C	T	PASS	intron_variant	MODIFIER	LOC111097683	111097683	transcript	XR_002630668.1	pseudogene	1	n.844+39912C>T
10	35472267	C	T	PASS	intron_variant	MODIFIER	LOC111097683	111097683	transcript	XR_002630669.1	pseudogene	1	n.844+39912C>T
10	35472268	A	T	GATKstd	intron_variant	MODIFIER	LOC111097683	111097683	transcript	XR_002630668.1	pseudogene	1	n.844+39913A>T
10	35472268	A	T	GATKstd	intron_variant	MODIFIER	LOC111097683	111097683	transcript	XR_002630669.1	pseudogene	1	n.844+39913A>T
10	35534462	C	CATAAAGACATAATCACAAAAAAAAAAAAAAAAAAAAAAAAAAAAAAAAAAAA,CATAAAGACATAATCACAAAAAAAAAAAAAAAAAAAAAAAAAAAAAAAAAAAAAAAAAAAAAAA	PASS	intron_variant	MODIFIER	LOC111097683	111097683	transcript	XR_002630668.1	pseudogene	4	n.1271+7643_1271+7644insATAAAGACATAATCACAAAAAAAAAAAAAAAAAAAAAAAAAAAAAAAAAAAA
10	35534462	C	CATAAAGACATAATCACAAAAAAAAAAAAAAAAAAAAAAAAAAAAAAAAAAAA,CATAAAGACATAATCACAAAAAAAAAAAAAAAAAAAAAAAAAAAAAAAAAAAAAAAAAAAAAAA	PASS	intron_variant	MODIFIER	LOC111097683	111097683	transcript	XR_002630668.1	pseudogene	4	n.1271+7643_1271+7644insATAAAGACATAATCACAAAAAAAAAAAAAAAAAAAAAAAAAAAAAAAAAAAAAAAAAAAAAAA
10	35534462	C	CATAAAGACATAATCACAAAAAAAAAAAAAAAAAAAAAAAAAAAAAAAAAAAA,CATAAAGACATAATCACAAAAAAAAAAAAAAAAAAAAAAAAAAAAAAAAAAAAAAAAAAAAAAA	PASS	intron_variant	MODIFIER	LOC111097683	111097683	transcript	XR_002630669.1	pseudogene	4	n.1272-1979_1272-1978insATAAAGACATAATCACAAAAAAAAAAAAAAAAAAAAAAAAAAAAAAAAAAAA
10	35534462	C	CATAAAGACATAATCACAAAAAAAAAAAAAAAAAAAAAAAAAAAAAAAAAAAA,CATAAAGACATAATCACAAAAAAAAAAAAAAAAAAAAAAAAAAAAAAAAAAAAAAAAAAAAAAA	PASS	intron_variant	MODIFIER	LOC111097683	111097683	transcript	XR_002630669.1	pseudogene	4	n.1272-1979_1272-1978insATAAAGACATAATCACAAAAAAAAAAAAAAAAAAAAAAAAAAAAAAAAAAAAAAAAAAAAAAA
10	35648869	C	A	GATKstd	upstream_gene_variant	MODIFIER	LOC481309	481309	transcript	XM_538430.5	protein_coding	-1	c.-19623G>T
10	35648869	C	A	GATKstd	intron_variant	MODIFIER	LOC106559386	106559386	transcript	XR_001317092.2	pseudogene	3	n.316+1498C>A
10	35663488	T	C	PASS	upstream_gene_variant	MODIFIER	LOC100688002	100688002	transcript	100688002	pseudogene	-1	n.-3012T>C
10	35663488	T	C	PASS	intron_variant	MODIFIER	LOC106559386	106559386	transcript	XR_001317092.2	pseudogene	3	n.317-97T>C
10	35680958	G	A	GATKstd	intergenic_region	MODIFIER	LOC100688002-LOC111097685	100688002-111097685	intergenic_region	100688002-111097685		-1	n.35680958G>A
10	35685128	A	T	GATKstd	intergenic_region	MODIFIER	LOC100688002-LOC111097685	100688002-111097685	intergenic_region	100688002-111097685		-1	n.35685128A>T
10	35721230	C	T	GATKstd	intergenic_region	MODIFIER	LOC100688002-LOC111097685	100688002-111097685	intergenic_region	100688002-111097685		-1	n.35721230C>T
10	35723061	A	T	GATKstd	intergenic_region	MODIFIER	LOC100688002-LOC111097685	100688002-111097685	intergenic_region	100688002-111097685		-1	n.35723061A>T
10	35831361	A	G	GATKstd	intron_variant	MODIFIER	LOC102154326	102154326	transcript	XR_293384.2	pseudogene	1	n.284-8965A>G
10	35874471	C	T	PASS	intergenic_region	MODIFIER	LOC100688158-SLC5A7	100688158-481311	intergenic_region	100688158-481311		-1	n.35874471C>T
10	35911059	A	G	GATKstd	upstream_gene_variant	MODIFIER	SLC5A7	481311	transcript	XM_538432.6	protein_coding	-1	c.-4213T>C
10	35911059	A	G	GATKstd	intergenic_region	MODIFIER	SLC5A7-LOC100855857	481311-100855857	intergenic_region	481311-100855857		-1	n.35911059A>G
10	35949129	C	T	GATKstd	intergenic_region	MODIFIER	SLC5A7-LOC100855857	481311-100855857	intergenic_region	481311-100855857		-1	n.35949129C>T
10	35981822	G	A	GATKstd	intergenic_region	MODIFIER	SLC5A7-LOC100855857	481311-100855857	intergenic_region	481311-100855857		-1	n.35981822G>A
10	35993147	T	C	PASS	intergenic_region	MODIFIER	SLC5A7-LOC100855857	481311-100855857	intergenic_region	481311-100855857		-1	n.35993147T>C
10	36021533	C	A	GATKstd	intergenic_region	MODIFIER	SLC5A7-LOC100855857	481311-100855857	intergenic_region	481311-100855857		-1	n.36021533C>A
10	36021583	C	T	GATKstd	intergenic_region	MODIFIER	SLC5A7-LOC100855857	481311-100855857	intergenic_region	481311-100855857		-1	n.36021583C>T
10	36040677	T	A	PASS	upstream_gene_variant	MODIFIER	LOC100855857	100855857	transcript	100855857	pseudogene	-1	n.-4688A>T
10	36040677	T	A	PASS	intergenic_region	MODIFIER	LOC100855857-LOC111097842	100855857-111097842	intergenic_region	100855857-111097842		-1	n.36040677T>A
10	36057079	C	T	GATKstd	intergenic_region	MODIFIER	LOC100855857-LOC111097842	100855857-111097842	intergenic_region	100855857-111097842		-1	n.36057079C>T
10	36122327	G	A	GATKstd	intergenic_region	MODIFIER	LOC100855857-LOC111097842	100855857-111097842	intergenic_region	100855857-111097842		-1	n.36122327G>A
10	36151916	C	T	GATKstd	intergenic_region	MODIFIER	LOC100855857-LOC111097842	100855857-111097842	intergenic_region	100855857-111097842		-1	n.36151916C>T
10	36163793	TGGG	T	PASS	intergenic_region	MODIFIER	LOC100855857-LOC111097842	100855857-111097842	intergenic_region	100855857-111097842		-1	n.36163794_36163796delGGG
10	36163796	G	GAATAATA	PASS	intergenic_region	MODIFIER	LOC100855857-LOC111097842	100855857-111097842	intergenic_region	100855857-111097842		-1	n.36163796_36163797insAATAATA
10	36190421	T	A	GATKstd	intergenic_region	MODIFIER	LOC100855857-LOC111097842	100855857-111097842	intergenic_region	100855857-111097842		-1	n.36190421T>A
10	36192058	GTGATGAAC	G	PASS	intergenic_region	MODIFIER	LOC100855857-LOC111097842	100855857-111097842	intergenic_region	100855857-111097842		-1	n.36192059_36192066delTGATGAAC
10	36276432	TTCTC	T	PASS	intergenic_region	MODIFIER	LOC111097842-LOC100682592	111097842-100682592	intergenic_region	111097842-100682592		-1	n.36276433_36276436delTCTC
10	36301353	G	A	GATKstd	intergenic_region	MODIFIER	LOC100682592-LOC100688434	100682592-100688434	intergenic_region	100682592-100688434		-1	n.36301353G>A
10	36327696	T	A	GATKstd	intergenic_region	MODIFIER	LOC100682592-LOC100688434	100682592-100688434	intergenic_region	100682592-100688434		-1	n.36327696T>A
10	36382566	C	T	GATKstd	intergenic_region	MODIFIER	LOC100682592-LOC100688434	100682592-100688434	intergenic_region	100682592-100688434		-1	n.36382566C>T
10	36436556	T	TGAACAATA	PASS	intergenic_region	MODIFIER	LOC100682592-LOC100688434	100682592-100688434	intergenic_region	100682592-100688434		-1	n.36436556_36436557insGAACAATA
10	36476130	C	T	GATKstd	intergenic_region	MODIFIER	LOC100682592-LOC100688434	100682592-100688434	intergenic_region	100682592-100688434		-1	n.36476130C>T
10	36493953	G	A	GATKstd	intergenic_region	MODIFIER	LOC100688434-LOC111097843	100688434-111097843	intergenic_region	100688434-111097843		-1	n.36493953G>A
10	36515934	CT	C	PASS	intergenic_region	MODIFIER	LOC100688434-LOC111097843	100688434-111097843	intergenic_region	100688434-111097843		-1	n.36515935delT
10	36544788	G	A	GATKstd	intergenic_region	MODIFIER	LOC100688434-LOC111097843	100688434-111097843	intergenic_region	100688434-111097843		-1	n.36544788G>A
10	36547892	G	C	GATKstd	intergenic_region	MODIFIER	LOC100688434-LOC111097843	100688434-111097843	intergenic_region	100688434-111097843		-1	n.36547892G>C
10	36580911	G	A	PASS	intergenic_region	MODIFIER	LOC100688434-LOC111097843	100688434-111097843	intergenic_region	100688434-111097843		-1	n.36580911G>A
10	36648153	A	C	GATKstd	intergenic_region	MODIFIER	LOC100688434-LOC111097843	100688434-111097843	intergenic_region	100688434-111097843		-1	n.36648153A>C
10	36657272	T	A	GATKstd	intergenic_region	MODIFIER	LOC100688434-LOC111097843	100688434-111097843	intergenic_region	100688434-111097843		-1	n.36657272T>A
10	36678434	G	A	GATKstd	upstream_gene_variant	MODIFIER	LOC100682742	100682742	transcript	XM_022424309.1	protein_coding	-1	c.-937G>A
10	36678434	G	A	GATKstd	intergenic_region	MODIFIER	LOC111097843-LOC100682742	111097843-100682742	intergenic_region	111097843-100682742		-1	n.36678434G>A
10	36678437	T	A	GATKstd	upstream_gene_variant	MODIFIER	LOC100682742	100682742	transcript	XM_022424309.1	protein_coding	-1	c.-934T>A
10	36678437	T	A	GATKstd	intergenic_region	MODIFIER	LOC111097843-LOC100682742	111097843-100682742	intergenic_region	111097843-100682742		-1	n.36678437T>A
10	36702801	A	G	GATKstd	intergenic_region	MODIFIER	LOC100682742-LOC611115	100682742-611115	intergenic_region	100682742-611115		-1	n.36702801A>G
10	36887018	G	A	GATKstd	intron_variant	MODIFIER	LOC102154849	102154849	transcript	XR_293385.2	pseudogene	1	n.500+6848C>T
10	37328523	G	T	GATKstd	intergenic_region	MODIFIER	MIR8799C-UXS1	104796447-481318	intergenic_region	104796447-481318		-1	n.37328523G>T
10	38393395	A	AACTTT	PASS	intron_variant	MODIFIER	LOC111097695	111097695	transcript	XR_002630687.1	pseudogene	1	n.235-21678_235-21677insACTTT
10	39084226	C	T	GATKstd	intergenic_region	MODIFIER	LOC111097700-LOC111097844	111097700-111097844	intergenic_region	111097700-111097844		-1	n.39084226C>T
10	39084228	G	T	GATKstd	intergenic_region	MODIFIER	LOC111097700-LOC111097844	111097700-111097844	intergenic_region	111097700-111097844		-1	n.39084228G>T
10	39084230	G	T	GATKstd	intergenic_region	MODIFIER	LOC111097700-LOC111097844	111097700-111097844	intergenic_region	111097700-111097844		-1	n.39084230G>T
10	39084232	G	T	GATKstd	intergenic_region	MODIFIER	LOC111097700-LOC111097844	111097700-111097844	intergenic_region	111097700-111097844		-1	n.39084232G>T
10	39211758	G	GAAAAAAAAAAAAAAAAAAAAAAAAAAAAAA	PASS	intergenic_region	MODIFIER	LOC111097700-LOC111097844	111097700-111097844	intergenic_region	111097700-111097844		-1	n.39211758_39211759insAAAAAAAAAAAAAAAAAAAAAAAAAAAAAA
10	40578535	TGCA	T	PASS	3_prime_UTR_variant	MODIFIER	IL18RAP	481327	transcript	XM_022424554.1	protein_coding	10	c.*75_*77delTGC
10	40578535	TGCA	T	PASS	downstream_gene_variant	MODIFIER	IL18RAP	481327	transcript	XM_538448.6	protein_coding	-1	c.*3011_*3013delTGC
10	40578535	TGCA	T	PASS	downstream_gene_variant	MODIFIER	IL18RAP	481327	transcript	XM_014117426.2	protein_coding	-1	c.*3011_*3013delTGC
10	40578539	G	T	GATKstd	3_prime_UTR_variant	MODIFIER	IL18RAP	481327	transcript	XM_022424554.1	protein_coding	10	c.*74C>A
10	40578539	G	T	GATKstd	downstream_gene_variant	MODIFIER	IL18RAP	481327	transcript	XM_538448.6	protein_coding	-1	c.*3010C>A
10	40578539	G	T	GATKstd	downstream_gene_variant	MODIFIER	IL18RAP	481327	transcript	XM_014117426.2	protein_coding	-1	c.*3010C>A
10	42589933	T	A	GATKstd	intron_variant	MODIFIER	AFF3	611584	transcript	XM_014117468.2	protein_coding	1	c.50+2501T>A
10	42589933	T	A	GATKstd	intron_variant	MODIFIER	AFF3	611584	transcript	XM_014117469.2	protein_coding	1	c.50+2501T>A
10	42589933	T	A	GATKstd	intron_variant	MODIFIER	AFF3	611584	transcript	XM_022424585.1	protein_coding	1	c.50+2501T>A
10	42589933	T	A	GATKstd	intron_variant	MODIFIER	AFF3	611584	transcript	XM_005626014.3	protein_coding	1	c.50+2501T>A
10	42589933	T	A	GATKstd	intron_variant	MODIFIER	AFF3	611584	transcript	XM_005626015.3	protein_coding	1	c.50+2501T>A
10	42778139	C	T	GATKstd	intron_variant	MODIFIER	AFF3	611584	transcript	XM_014117468.2	protein_coding	5	c.946-62860C>T
10	42778139	C	T	GATKstd	intron_variant	MODIFIER	AFF3	611584	transcript	XM_014117469.2	protein_coding	5	c.946-62860C>T
10	42778139	C	T	GATKstd	intron_variant	MODIFIER	AFF3	611584	transcript	XM_022424585.1	protein_coding	4	c.871-62860C>T
10	42778139	C	T	GATKstd	intron_variant	MODIFIER	AFF3	611584	transcript	XM_005626014.3	protein_coding	5	c.946-62860C>T
10	42778139	C	T	GATKstd	intron_variant	MODIFIER	AFF3	611584	transcript	XM_005626015.3	protein_coding	5	c.946-62860C>T
10	42778139	C	T	GATKstd	intron_variant	MODIFIER	AFF3	611584	transcript	XM_022424586.1	protein_coding	4	c.640-62860C>T
10	43807757	G	A	PASS	intron_variant	MODIFIER	KIAA1211L	481340	transcript	XM_022424598.1	protein_coding	3	c.91+692G>A
10	43886468	GA	G	PASS	intergenic_region	MODIFIER	KIAA1211L-MGAT4A	481340-474562	intergenic_region	481340-474562		-1	n.43886469delA
10	44291206	C	T	GATKstd	intron_variant	MODIFIER	VWA3B	474564	transcript	XM_022424627.1	protein_coding	28	c.3745-12106G>A
10	44291206	C	T	GATKstd	intron_variant	MODIFIER	VWA3B	474564	transcript	XM_022424629.1	protein_coding	28	c.3745-596G>A
10	44797747	C	T	PASS	intron_variant	MODIFIER	TMEM131	474566	transcript	XM_531794.6	protein_coding	31	c.4141+3970C>T
10	44824662	A	G	PASS	intron_variant	MODIFIER	TMEM131	474566	transcript	XM_531794.6	protein_coding	40	c.5365-174A>G
10	45308645	G	A	GATKstd	upstream_gene_variant	MODIFIER	FER1L5	481347	transcript	XM_005626058.3	protein_coding	-1	c.-3852C>T
10	45308645	G	A	GATKstd	upstream_gene_variant	MODIFIER	FER1L5	481347	transcript	XM_005626059.3	protein_coding	-1	c.-3852C>T
10	45308645	G	A	GATKstd	upstream_gene_variant	MODIFIER	FER1L5	481347	transcript	XM_014117497.2	protein_coding	-1	c.-3852C>T
10	45308645	G	A	GATKstd	upstream_gene_variant	MODIFIER	FER1L5	481347	transcript	XM_022424643.1	protein_coding	-1	c.-3852C>T
10	45308645	G	A	GATKstd	upstream_gene_variant	MODIFIER	FER1L5	481347	transcript	XM_022424644.1	protein_coding	-1	c.-3852C>T
10	45308645	G	A	GATKstd	upstream_gene_variant	MODIFIER	FER1L5	481347	transcript	XM_022424645.1	protein_coding	-1	c.-3852C>T
10	45308645	G	A	GATKstd	upstream_gene_variant	MODIFIER	FER1L5	481347	transcript	XM_022424646.1	protein_coding	-1	c.-3852C>T
10	45308645	G	A	GATKstd	upstream_gene_variant	MODIFIER	FER1L5	481347	transcript	XM_022424647.1	protein_coding	-1	c.-3852C>T
10	45308645	G	A	GATKstd	upstream_gene_variant	MODIFIER	FER1L5	481347	transcript	XM_022424650.1	protein_coding	-1	c.-3852C>T
10	45308645	G	A	GATKstd	upstream_gene_variant	MODIFIER	FER1L5	481347	transcript	XM_022424649.1	protein_coding	-1	c.-3852C>T
10	45308645	G	A	GATKstd	upstream_gene_variant	MODIFIER	FER1L5	481347	transcript	XM_005626061.3	protein_coding	-1	c.-3852C>T
10	45308645	G	A	GATKstd	upstream_gene_variant	MODIFIER	FER1L5	481347	transcript	XM_022424651.1	protein_coding	-1	c.-3852C>T
10	45308645	G	A	GATKstd	upstream_gene_variant	MODIFIER	FER1L5	481347	transcript	XM_022424652.1	protein_coding	-1	c.-3852C>T
10	45308645	G	A	GATKstd	upstream_gene_variant	MODIFIER	FER1L5	481347	transcript	XM_022424654.1	protein_coding	-1	c.-3852C>T
10	45308645	G	A	GATKstd	upstream_gene_variant	MODIFIER	FER1L5	481347	transcript	XM_022424653.1	protein_coding	-1	c.-3852C>T
10	45308645	G	A	GATKstd	upstream_gene_variant	MODIFIER	FER1L5	481347	transcript	XM_022424655.1	protein_coding	-1	c.-3852C>T
10	45308645	G	A	GATKstd	upstream_gene_variant	MODIFIER	FER1L5	481347	transcript	XM_022424656.1	protein_coding	-1	c.-3852C>T
10	45308645	G	A	GATKstd	upstream_gene_variant	MODIFIER	FER1L5	481347	transcript	XR_002630716.1	pseudogene	-1	n.-3852C>T
10	45308645	G	A	GATKstd	upstream_gene_variant	MODIFIER	FER1L5	481347	transcript	XR_002630717.1	pseudogene	-1	n.-3852C>T
10	45308645	G	A	GATKstd	upstream_gene_variant	MODIFIER	FER1L5	481347	transcript	XM_022424657.1	protein_coding	-1	c.-3852C>T
10	45308645	G	A	GATKstd	intergenic_region	MODIFIER	FER1L5-KANSL3	481347-481348	intergenic_region	481347-481348		-1	n.45308645G>A
10	45310203	C	T	GATKstd	intergenic_region	MODIFIER	FER1L5-KANSL3	481347-481348	intergenic_region	481347-481348		-1	n.45310203C>T
10	45451355	G	T	PASS	intergenic_region	MODIFIER	LOC111097720-LOC106559420	111097720-106559420	intergenic_region	111097720-106559420		-1	n.45451355G>T
10	45965820	G	GCGGTTTGGCGCCTGT	PASS	intron_variant	MODIFIER	THADA	100126180	transcript	NM_001109959.1	protein_coding	26	c.3827+18027_3827+18028insACAGGCGCCAAACCG
10	45965820	G	GCGGTTTGGCGCCTGT	PASS	intron_variant	MODIFIER	LOC111097722	111097722	transcript	XR_002630726.1	pseudogene	2	n.1469+649_1469+650insCGGTTTGGCGCCTGT
10	45965820	G	GCGGTTTGGCGCCTGT	PASS	intron_variant	MODIFIER	THADA	100126180	transcript	XM_022423966.1	protein_coding	26	c.3827+18027_3827+18028insACAGGCGCCAAACCG
10	45965820	G	GCGGTTTGGCGCCTGT	PASS	intron_variant	MODIFIER	THADA	100126180	transcript	XM_022423967.1	protein_coding	26	c.3827+18027_3827+18028insACAGGCGCCAAACCG
10	45965820	G	GCGGTTTGGCGCCTGT	PASS	intron_variant	MODIFIER	THADA	100126180	transcript	XM_005625665.3	protein_coding	27	c.3827+18027_3827+18028insACAGGCGCCAAACCG
10	45965820	G	GCGGTTTGGCGCCTGT	PASS	intron_variant	MODIFIER	THADA	100126180	transcript	XM_022423968.1	protein_coding	27	c.3827+18027_3827+18028insACAGGCGCCAAACCG
10	46427510	T	A	PASS	intron_variant	MODIFIER	LRPPRC	474572	transcript	XM_531800.6	protein_coding	1	c.150-5682A>T
10	46724107	A	G	GATKstd	intron_variant	MODIFIER	SLC3A1	403700	transcript	NM_001003109.1	protein_coding	5	c.1057-1003A>G
10	46724107	A	G	GATKstd	intron_variant	MODIFIER	SLC3A1	403700	transcript	XM_022423985.1	protein_coding	6	c.1096-1003A>G
10	47120630	A	T	GATKstd	intron_variant	MODIFIER	CAMKMT	474575	transcript	XM_846713.5	protein_coding	3	c.377-2784A>T
10	47120630	A	T	GATKstd	intron_variant	MODIFIER	CAMKMT	474575	transcript	XR_002630733.1	pseudogene	3	n.518-2784A>T
10	47120630	A	T	GATKstd	intron_variant	MODIFIER	CAMKMT	474575	transcript	XM_005626072.3	protein_coding	3	c.377-2784A>T
10	47120630	A	T	GATKstd	intron_variant	MODIFIER	CAMKMT	474575	transcript	XM_022424673.1	protein_coding	3	c.377-2784A>T
10	47120630	A	T	GATKstd	intron_variant	MODIFIER	CAMKMT	474575	transcript	XM_005626071.3	protein_coding	3	c.245-2784A>T
10	47120630	A	T	GATKstd	intron_variant	MODIFIER	CAMKMT	474575	transcript	XM_022424674.1	protein_coding	4	c.257-2784A>T
10	47610505	TTTC	T	PASS	intron_variant	MODIFIER	LOC111097728	111097728	transcript	XR_002630756.1	pseudogene	8	n.3792-13537_3792-13535delGAA
10	47610505	TTTC	T	PASS	intron_variant	MODIFIER	LOC111097728	111097728	transcript	XR_002630750.1	pseudogene	1	n.694-4582_694-4580delGAA
10	47610505	TTTC	T	PASS	intron_variant	MODIFIER	LOC111097728	111097728	transcript	XR_002630751.1	pseudogene	1	n.694-4582_694-4580delGAA
10	47610505	TTTC	T	PASS	intron_variant	MODIFIER	LOC111097728	111097728	transcript	XR_002630753.1	pseudogene	1	n.694-4582_694-4580delGAA
10	47610505	TTTC	T	PASS	intron_variant	MODIFIER	LOC111097728	111097728	transcript	XR_002630754.1	pseudogene	1	n.694-2946_694-2944delGAA
10	47610505	TTTC	T	PASS	intron_variant	MODIFIER	LOC111097728	111097728	transcript	XR_002630755.1	pseudogene	1	n.694-4582_694-4580delGAA
10	47610505	TTTC	T	PASS	intron_variant	MODIFIER	LOC111097728	111097728	transcript	XR_002630757.1	pseudogene	1	n.693+7350_693+7352delGAA
10	47610505	TTTC	T	PASS	intron_variant	MODIFIER	LOC111097728	111097728	transcript	XR_002630759.1	pseudogene	1	n.693+7350_693+7352delGAA
10	47610505	TTTC	T	PASS	intron_variant	MODIFIER	LOC111097728	111097728	transcript	XR_002630749.1	pseudogene	7	n.1182-13537_1182-13535delGAA
10	47610505	TTTC	T	PASS	intron_variant	MODIFIER	LOC111097728	111097728	transcript	XR_002630738.1	pseudogene	8	n.3792-13537_3792-13535delGAA
10	47610505	TTTC	T	PASS	intron_variant	MODIFIER	LOC111097728	111097728	transcript	XR_002630739.1	pseudogene	7	n.3718-13537_3718-13535delGAA
10	47610505	TTTC	T	PASS	intron_variant	MODIFIER	LOC111097728	111097728	transcript	XR_002630740.1	pseudogene	7	n.3581-13537_3581-13535delGAA
10	47610505	TTTC	T	PASS	intron_variant	MODIFIER	LOC111097728	111097728	transcript	XR_002630741.1	pseudogene	9	n.2866-13537_2866-13535delGAA
10	47610505	TTTC	T	PASS	intron_variant	MODIFIER	LOC111097728	111097728	transcript	XR_002630742.1	pseudogene	10	n.2028-13537_2028-13535delGAA
10	47610505	TTTC	T	PASS	intron_variant	MODIFIER	LOC111097728	111097728	transcript	XR_002630743.1	pseudogene	8	n.3792-13592_3792-13590delGAA
10	47610505	TTTC	T	PASS	intron_variant	MODIFIER	LOC111097728	111097728	transcript	XR_002630744.1	pseudogene	4	n.3146-13537_3146-13535delGAA
10	47610505	TTTC	T	PASS	intron_variant	MODIFIER	LOC111097728	111097728	transcript	XR_002630745.1	pseudogene	9	n.1945-13537_1945-13535delGAA
10	47610505	TTTC	T	PASS	intron_variant	MODIFIER	LOC111097728	111097728	transcript	XR_002630746.1	pseudogene	8	n.3792-13537_3792-13535delGAA
10	47610505	TTTC	T	PASS	intron_variant	MODIFIER	LOC111097728	111097728	transcript	XR_002630747.1	pseudogene	8	n.1786-13537_1786-13535delGAA
10	47610505	TTTC	T	PASS	intron_variant	MODIFIER	LOC111097728	111097728	transcript	XR_002630748.1	pseudogene	8	n.3792-13537_3792-13535delGAA
10	47610505	TTTC	T	PASS	intron_variant	MODIFIER	LOC111097728	111097728	transcript	XR_002630752.1	pseudogene	8	n.3792-13537_3792-13535delGAA
10	47610505	TTTC	T	PASS	intron_variant	MODIFIER	LOC111097728	111097728	transcript	XR_002630758.1	pseudogene	8	n.3792-13537_3792-13535delGAA
10	47656705	G	A	PASS	intron_variant	MODIFIER	LOC111097728	111097728	transcript	XR_002630756.1	pseudogene	5	n.3209+623C>T
10	47656705	G	A	PASS	intron_variant	MODIFIER	LOC111097728	111097728	transcript	XR_002630749.1	pseudogene	4	n.599+623C>T
10	47656705	G	A	PASS	intron_variant	MODIFIER	LOC111097728	111097728	transcript	XR_002630738.1	pseudogene	5	n.3209+623C>T
10	47656705	G	A	PASS	intron_variant	MODIFIER	LOC111097728	111097728	transcript	XR_002630739.1	pseudogene	4	n.3135+623C>T
10	47656705	G	A	PASS	intron_variant	MODIFIER	LOC111097728	111097728	transcript	XR_002630740.1	pseudogene	4	n.2998+623C>T
10	47656705	G	A	PASS	intron_variant	MODIFIER	LOC111097728	111097728	transcript	XR_002630741.1	pseudogene	6	n.2283+623C>T
10	47656705	G	A	PASS	intron_variant	MODIFIER	LOC111097728	111097728	transcript	XR_002630742.1	pseudogene	7	n.1445+623C>T
10	47656705	G	A	PASS	intron_variant	MODIFIER	LOC111097728	111097728	transcript	XR_002630743.1	pseudogene	5	n.3209+623C>T
10	47656705	G	A	PASS	intron_variant	MODIFIER	LOC111097728	111097728	transcript	XR_002630744.1	pseudogene	3	n.2836-32171C>T
10	47656705	G	A	PASS	intron_variant	MODIFIER	LOC111097728	111097728	transcript	XR_002630745.1	pseudogene	6	n.1362+623C>T
10	47656705	G	A	PASS	intron_variant	MODIFIER	LOC111097728	111097728	transcript	XR_002630746.1	pseudogene	5	n.3209+623C>T
10	47656705	G	A	PASS	intron_variant	MODIFIER	LOC111097728	111097728	transcript	XR_002630747.1	pseudogene	5	n.1203+623C>T
10	47656705	G	A	PASS	intron_variant	MODIFIER	LOC111097728	111097728	transcript	XR_002630748.1	pseudogene	5	n.3209+623C>T
10	47656705	G	A	PASS	intron_variant	MODIFIER	LOC111097728	111097728	transcript	XR_002630752.1	pseudogene	5	n.3209+623C>T
10	47656705	G	A	PASS	intron_variant	MODIFIER	LOC111097728	111097728	transcript	XR_002630758.1	pseudogene	5	n.3209+623C>T
10	47670610	A	AGC	PASS	intron_variant	MODIFIER	LOC111097728	111097728	transcript	XR_002630756.1	pseudogene	3	n.2836-10268_2836-10267insGC
10	47670610	A	AGC	PASS	intron_variant	MODIFIER	LOC111097728	111097728	transcript	XR_002630749.1	pseudogene	2	n.226-10268_226-10267insGC
10	47670610	A	AGC	PASS	intron_variant	MODIFIER	LOC111097728	111097728	transcript	XR_002630738.1	pseudogene	3	n.2836-10268_2836-10267insGC
10	47670610	A	AGC	PASS	intron_variant	MODIFIER	LOC111097728	111097728	transcript	XR_002630739.1	pseudogene	2	n.2762-10268_2762-10267insGC
10	47670610	A	AGC	PASS	intron_variant	MODIFIER	LOC111097728	111097728	transcript	XR_002630740.1	pseudogene	3	n.2836-13121_2836-13120insGC
10	47670610	A	AGC	PASS	intron_variant	MODIFIER	LOC111097728	111097728	transcript	XR_002630741.1	pseudogene	4	n.1910-10268_1910-10267insGC
10	47670610	A	AGC	PASS	intron_variant	MODIFIER	LOC111097728	111097728	transcript	XR_002630742.1	pseudogene	5	n.1072-10268_1072-10267insGC
10	47670610	A	AGC	PASS	intron_variant	MODIFIER	LOC111097728	111097728	transcript	XR_002630743.1	pseudogene	3	n.2836-10268_2836-10267insGC
10	47670610	A	AGC	PASS	intron_variant	MODIFIER	LOC111097728	111097728	transcript	XR_002630744.1	pseudogene	3	n.2836-46077_2836-46076insGC
10	47670610	A	AGC	PASS	intron_variant	MODIFIER	LOC111097728	111097728	transcript	XR_002630745.1	pseudogene	4	n.989-10268_989-10267insGC
10	47670610	A	AGC	PASS	intron_variant	MODIFIER	LOC111097728	111097728	transcript	XR_002630746.1	pseudogene	3	n.2836-10268_2836-10267insGC
10	47670610	A	AGC	PASS	intron_variant	MODIFIER	LOC111097728	111097728	transcript	XR_002630747.1	pseudogene	3	n.830-10268_830-10267insGC
10	47670610	A	AGC	PASS	intron_variant	MODIFIER	LOC111097728	111097728	transcript	XR_002630748.1	pseudogene	3	n.2836-10268_2836-10267insGC
10	47670610	A	AGC	PASS	intron_variant	MODIFIER	LOC111097728	111097728	transcript	XR_002630752.1	pseudogene	3	n.2836-10268_2836-10267insGC
10	47670610	A	AGC	PASS	intron_variant	MODIFIER	LOC111097728	111097728	transcript	XR_002630758.1	pseudogene	3	n.2836-10268_2836-10267insGC
10	47787674	T	A	GATKstd	intron_variant	MODIFIER	SRBD1	611842	transcript	XM_849562.5	protein_coding	16	c.2080-10972A>T
10	47787674	T	A	GATKstd	intron_variant	MODIFIER	SRBD1	611842	transcript	XM_022424678.1	protein_coding	16	c.2029-10972A>T
10	47787674	T	A	GATKstd	intron_variant	MODIFIER	SRBD1	611842	transcript	XM_022424677.1	protein_coding	17	c.2071-10972A>T
10	47880668	G	A	GATKstd	intron_variant	MODIFIER	SRBD1	611842	transcript	XM_849562.5	protein_coding	12	c.1705+1267C>T
10	47880668	G	A	GATKstd	intron_variant	MODIFIER	SRBD1	611842	transcript	XM_022424678.1	protein_coding	12	c.1654+1267C>T
10	47880668	G	A	GATKstd	intron_variant	MODIFIER	SRBD1	611842	transcript	XM_022424677.1	protein_coding	13	c.1696+1267C>T
10	48332158	G	A	GATKstd	intron_variant	MODIFIER	PRKCE	609934	transcript	XM_022424679.1	protein_coding	10	c.1437+18080G>A
10	48332158	G	A	GATKstd	intron_variant	MODIFIER	PRKCE	609934	transcript	XM_005626079.3	protein_coding	10	c.1437+18080G>A
10	48332158	G	A	GATKstd	intron_variant	MODIFIER	PRKCE	609934	transcript	XM_846768.5	protein_coding	10	c.1437+18080G>A
10	48425182	C	T	GATKstd	intron_variant	MODIFIER	PRKCE	609934	transcript	XM_022424679.1	protein_coding	11	c.1593-2563C>T
10	48425182	C	T	GATKstd	intron_variant	MODIFIER	LOC111097732	111097732	transcript	XR_002630767.1	pseudogene	1	n.389+599G>A
10	48425182	C	T	GATKstd	intron_variant	MODIFIER	PRKCE	609934	transcript	XM_005626079.3	protein_coding	11	c.1593-2563C>T
10	48425182	C	T	GATKstd	intron_variant	MODIFIER	PRKCE	609934	transcript	XM_846768.5	protein_coding	11	c.1593-2563C>T
10	48425182	C	T	GATKstd	intron_variant	MODIFIER	LOC111097732	111097732	transcript	XR_002630766.1	pseudogene	1	n.389+599G>A
10	48527888	A	C	GATKstd	intergenic_region	MODIFIER	LOC111097736-EPAS1	111097736-474578	intergenic_region	111097736-474578		-1	n.48527888A>C
10	48885973	G	A	GATKstd	intergenic_region	MODIFIER	LOC111097738-LOC111097739	111097738-111097739	intergenic_region	111097738-111097739		-1	n.48885973G>A
10	49092759	T	C	GATKstd	3_prime_UTR_variant	MODIFIER	MCFD2	474582	transcript	XM_005626084.3	protein_coding	4	c.*334A>G
10	49092759	T	C	GATKstd	3_prime_UTR_variant	MODIFIER	MCFD2	474582	transcript	XM_531811.4	protein_coding	4	c.*334A>G
10	49178497	G	GCT	PASS	intron_variant	MODIFIER	TTC7A	474583	transcript	XM_022424685.1	protein_coding	8	c.924+2900_924+2901insCT
10	49178497	G	GCT	PASS	intron_variant	MODIFIER	TTC7A	474583	transcript	XM_022424686.1	protein_coding	8	c.771+2900_771+2901insCT
10	49178497	G	GCT	PASS	intron_variant	MODIFIER	TTC7A	474583	transcript	XM_022424688.1	protein_coding	8	c.924+2900_924+2901insCT
10	49178497	G	GCT	PASS	intron_variant	MODIFIER	TTC7A	474583	transcript	XM_022424689.1	protein_coding	8	c.924+2900_924+2901insCT
10	49178497	G	GCT	PASS	intron_variant	MODIFIER	TTC7A	474583	transcript	XM_005626086.3	protein_coding	8	c.924+2900_924+2901insCT
10	49178497	G	GCT	PASS	intron_variant	MODIFIER	TTC7A	474583	transcript	XM_022424687.1	protein_coding	8	c.735+2900_735+2901insCT
10	49864044	CCA	C	PASS	intron_variant	MODIFIER	FBXO11	481363	transcript	XM_538484.5	protein_coding	1	c.108+38_108+39delTG
10	50181686	TAAGA	T	PASS	intron_variant	MODIFIER	LOC111097744	111097744	transcript	XR_002630806.1	pseudogene	3	n.627+335_627+338delTCTT
10	50181686	TAAGA	T	PASS	intron_variant	MODIFIER	LOC111097744	111097744	transcript	XR_002630805.1	pseudogene	3	n.364+335_364+338delTCTT
10	50181686	TAAGA	T	PASS	intron_variant	MODIFIER	LOC111097744	111097744	transcript	XR_002630808.1	pseudogene	2	n.183-7693_183-7690delTCTT
10	50181686	TAAGA	T	PASS	intron_variant	MODIFIER	LOC111097744	111097744	transcript	XR_002630807.1	pseudogene	2	n.449-7693_449-7690delTCTT
10	50181690	A	ATTTT	PASS	intron_variant	MODIFIER	LOC111097744	111097744	transcript	XR_002630806.1	pseudogene	3	n.627+334_627+335insAAAA
10	50181690	A	ATTTT	PASS	intron_variant	MODIFIER	LOC111097744	111097744	transcript	XR_002630805.1	pseudogene	3	n.364+334_364+335insAAAA
10	50181690	A	ATTTT	PASS	intron_variant	MODIFIER	LOC111097744	111097744	transcript	XR_002630808.1	pseudogene	2	n.183-7694_183-7693insAAAA
10	50181690	A	ATTTT	PASS	intron_variant	MODIFIER	LOC111097744	111097744	transcript	XR_002630807.1	pseudogene	2	n.449-7694_449-7693insAAAA
10	51966911	A	T	GATKstd	intron_variant	MODIFIER	NRXN1	474589	transcript	XM_022424706.1	protein_coding	17	c.3392-98076T>A
10	51966911	A	T	GATKstd	intron_variant	MODIFIER	NRXN1	474589	transcript	XM_005626094.2	protein_coding	17	c.3392-98076T>A
10	51966911	A	T	GATKstd	intron_variant	MODIFIER	NRXN1	474589	transcript	XM_022424709.1	protein_coding	16	c.3365-98076T>A
10	51966911	A	T	GATKstd	intron_variant	MODIFIER	NRXN1	474589	transcript	XM_014117522.2	protein_coding	17	c.3389-98076T>A
10	51966911	A	T	GATKstd	intron_variant	MODIFIER	NRXN1	474589	transcript	XM_014117523.2	protein_coding	16	c.3374-98076T>A
10	51966911	A	T	GATKstd	intron_variant	MODIFIER	NRXN1	474589	transcript	XM_014117524.2	protein_coding	15	c.3362-98076T>A
10	51966911	A	T	GATKstd	intron_variant	MODIFIER	NRXN1	474589	transcript	XM_014117525.2	protein_coding	14	c.3332-98076T>A
10	51966911	A	T	GATKstd	intron_variant	MODIFIER	NRXN1	474589	transcript	XM_022424707.1	protein_coding	16	c.3380-98076T>A
10	51966911	A	T	GATKstd	intron_variant	MODIFIER	NRXN1	474589	transcript	XM_022424708.1	protein_coding	16	c.3368-98076T>A
10	51966911	A	T	GATKstd	intron_variant	MODIFIER	NRXN1	474589	transcript	XM_022424727.1	protein_coding	12	c.3278-98076T>A
10	51966911	A	T	GATKstd	intron_variant	MODIFIER	NRXN1	474589	transcript	XM_022424728.1	protein_coding	12	c.3278-98076T>A
10	51966911	A	T	GATKstd	intron_variant	MODIFIER	NRXN1	474589	transcript	XM_022424723.1	protein_coding	1	c.253+14009T>A
10	51966911	A	T	GATKstd	intron_variant	MODIFIER	NRXN1	474589	transcript	XM_022424724.1	protein_coding	1	c.253+14009T>A
10	51966911	A	T	GATKstd	intron_variant	MODIFIER	NRXN1	474589	transcript	XM_859844.5	protein_coding	1	c.253+14009T>A
10	51966911	A	T	GATKstd	intron_variant	MODIFIER	NRXN1	474589	transcript	XM_022424722.1	protein_coding	1	c.253+14009T>A
10	51966911	A	T	GATKstd	intron_variant	MODIFIER	NRXN1	474589	transcript	XM_005626098.2	protein_coding	16	c.3365-98076T>A
10	51966911	A	T	GATKstd	intron_variant	MODIFIER	NRXN1	474589	transcript	XM_005626100.2	protein_coding	15	c.3341-98076T>A
10	51966911	A	T	GATKstd	intron_variant	MODIFIER	NRXN1	474589	transcript	XM_005626101.2	protein_coding	14	c.3329-98076T>A
10	51966911	A	T	GATKstd	intron_variant	MODIFIER	NRXN1	474589	transcript	XM_022424710.1	protein_coding	16	c.3362-98076T>A
10	51966911	A	T	GATKstd	intron_variant	MODIFIER	NRXN1	474589	transcript	XM_022424711.1	protein_coding	16	c.3365-98076T>A
10	51966911	A	T	GATKstd	intron_variant	MODIFIER	NRXN1	474589	transcript	XM_022424712.1	protein_coding	15	c.3353-98076T>A
10	51966911	A	T	GATKstd	intron_variant	MODIFIER	NRXN1	474589	transcript	XM_022424713.1	protein_coding	15	c.3341-98076T>A
10	51966911	A	T	GATKstd	intron_variant	MODIFIER	NRXN1	474589	transcript	XM_022424714.1	protein_coding	15	c.3338-98076T>A
10	51966911	A	T	GATKstd	intron_variant	MODIFIER	NRXN1	474589	transcript	XM_022424715.1	protein_coding	17	c.3392-98076T>A
10	51966911	A	T	GATKstd	intron_variant	MODIFIER	NRXN1	474589	transcript	XM_022424716.1	protein_coding	15	c.3338-98076T>A
10	51966911	A	T	GATKstd	intron_variant	MODIFIER	NRXN1	474589	transcript	XM_022424717.1	protein_coding	14	c.3314-98076T>A
10	51966911	A	T	GATKstd	intron_variant	MODIFIER	NRXN1	474589	transcript	XM_022424718.1	protein_coding	12	c.3284-98076T>A
10	51966911	A	T	GATKstd	intron_variant	MODIFIER	NRXN1	474589	transcript	XM_022424719.1	protein_coding	11	c.3254-98076T>A
10	51966911	A	T	GATKstd	intron_variant	MODIFIER	NRXN1	474589	transcript	XM_022424720.1	protein_coding	11	c.3254-98076T>A
10	51966911	A	T	GATKstd	intron_variant	MODIFIER	NRXN1	474589	transcript	XM_531818.5	protein_coding	16	c.3365-98076T>A
10	51966911	A	T	GATKstd	intron_variant	MODIFIER	NRXN1	474589	transcript	XM_022424721.1	protein_coding	17	c.3392-98076T>A
10	52018946	C	T	GATKstd	intron_variant	MODIFIER	NRXN1	474589	transcript	XM_022424706.1	protein_coding	17	c.3391+80401G>A
10	52018946	C	T	GATKstd	intron_variant	MODIFIER	NRXN1	474589	transcript	XM_005626094.2	protein_coding	17	c.3391+80401G>A
10	52018946	C	T	GATKstd	intron_variant	MODIFIER	NRXN1	474589	transcript	XM_022424709.1	protein_coding	16	c.3364+80401G>A
10	52018946	C	T	GATKstd	intron_variant	MODIFIER	NRXN1	474589	transcript	XM_014117522.2	protein_coding	17	c.3388+80401G>A
10	52018946	C	T	GATKstd	intron_variant	MODIFIER	NRXN1	474589	transcript	XM_014117523.2	protein_coding	16	c.3373+80401G>A
10	52018946	C	T	GATKstd	intron_variant	MODIFIER	NRXN1	474589	transcript	XM_014117524.2	protein_coding	15	c.3361+80401G>A
10	52018946	C	T	GATKstd	intron_variant	MODIFIER	NRXN1	474589	transcript	XM_014117525.2	protein_coding	14	c.3331+80401G>A
10	52018946	C	T	GATKstd	intron_variant	MODIFIER	NRXN1	474589	transcript	XM_022424707.1	protein_coding	16	c.3379+80401G>A
10	52018946	C	T	GATKstd	intron_variant	MODIFIER	NRXN1	474589	transcript	XM_022424708.1	protein_coding	16	c.3367+80401G>A
10	52018946	C	T	GATKstd	intron_variant	MODIFIER	NRXN1	474589	transcript	XM_022424727.1	protein_coding	12	c.3277+80401G>A
10	52018946	C	T	GATKstd	intron_variant	MODIFIER	NRXN1	474589	transcript	XM_022424728.1	protein_coding	12	c.3277+80401G>A
10	52018946	C	T	GATKstd	intron_variant	MODIFIER	NRXN1	474589	transcript	XM_005626098.2	protein_coding	16	c.3364+80401G>A
10	52018946	C	T	GATKstd	intron_variant	MODIFIER	NRXN1	474589	transcript	XM_005626100.2	protein_coding	15	c.3340+80401G>A
10	52018946	C	T	GATKstd	intron_variant	MODIFIER	NRXN1	474589	transcript	XM_005626101.2	protein_coding	14	c.3328+80401G>A
10	52018946	C	T	GATKstd	intron_variant	MODIFIER	NRXN1	474589	transcript	XM_022424710.1	protein_coding	16	c.3361+80401G>A
10	52018946	C	T	GATKstd	intron_variant	MODIFIER	NRXN1	474589	transcript	XM_022424711.1	protein_coding	16	c.3364+80401G>A
10	52018946	C	T	GATKstd	intron_variant	MODIFIER	NRXN1	474589	transcript	XM_022424712.1	protein_coding	15	c.3352+80401G>A
10	52018946	C	T	GATKstd	intron_variant	MODIFIER	NRXN1	474589	transcript	XM_022424713.1	protein_coding	15	c.3340+80401G>A
10	52018946	C	T	GATKstd	intron_variant	MODIFIER	NRXN1	474589	transcript	XM_022424714.1	protein_coding	15	c.3337+80401G>A
10	52018946	C	T	GATKstd	intron_variant	MODIFIER	NRXN1	474589	transcript	XM_022424715.1	protein_coding	17	c.3391+80401G>A
10	52018946	C	T	GATKstd	intron_variant	MODIFIER	NRXN1	474589	transcript	XM_022424716.1	protein_coding	15	c.3337+80401G>A
10	52018946	C	T	GATKstd	intron_variant	MODIFIER	NRXN1	474589	transcript	XM_022424717.1	protein_coding	14	c.3313+80401G>A
10	52018946	C	T	GATKstd	intron_variant	MODIFIER	NRXN1	474589	transcript	XM_022424718.1	protein_coding	12	c.3283+80401G>A
10	52018946	C	T	GATKstd	intron_variant	MODIFIER	NRXN1	474589	transcript	XM_022424719.1	protein_coding	11	c.3253+80401G>A
10	52018946	C	T	GATKstd	intron_variant	MODIFIER	NRXN1	474589	transcript	XM_022424720.1	protein_coding	11	c.3253+80401G>A
10	52018946	C	T	GATKstd	intron_variant	MODIFIER	NRXN1	474589	transcript	XM_531818.5	protein_coding	16	c.3364+80401G>A
10	52018946	C	T	GATKstd	intron_variant	MODIFIER	NRXN1	474589	transcript	XM_022424721.1	protein_coding	17	c.3391+80401G>A
10	52273809	G	T	GATKstd	intron_variant	MODIFIER	NRXN1	474589	transcript	XM_022424706.1	protein_coding	4	c.833-15710C>A
10	52273809	G	T	GATKstd	intron_variant	MODIFIER	NRXN1	474589	transcript	XM_005626094.2	protein_coding	4	c.833-15710C>A
10	52273809	G	T	GATKstd	intron_variant	MODIFIER	NRXN1	474589	transcript	XM_022424709.1	protein_coding	4	c.833-15710C>A
10	52273809	G	T	GATKstd	intron_variant	MODIFIER	NRXN1	474589	transcript	XM_014117522.2	protein_coding	4	c.830-15710C>A
10	52273809	G	T	GATKstd	intron_variant	MODIFIER	NRXN1	474589	transcript	XM_014117523.2	protein_coding	3	c.815-15710C>A
10	52273809	G	T	GATKstd	intron_variant	MODIFIER	NRXN1	474589	transcript	XM_014117524.2	protein_coding	2	c.803-15710C>A
10	52273809	G	T	GATKstd	intron_variant	MODIFIER	NRXN1	474589	transcript	XM_014117525.2	protein_coding	1	c.773-15710C>A
10	52273809	G	T	GATKstd	intron_variant	MODIFIER	NRXN1	474589	transcript	XM_022424707.1	protein_coding	3	c.821-15710C>A
10	52273809	G	T	GATKstd	intron_variant	MODIFIER	NRXN1	474589	transcript	XM_022424708.1	protein_coding	4	c.833-15710C>A
10	52273809	G	T	GATKstd	intron_variant	MODIFIER	NRXN1	474589	transcript	XM_022424727.1	protein_coding	1	c.773-15710C>A
10	52273809	G	T	GATKstd	intron_variant	MODIFIER	NRXN1	474589	transcript	XM_022424728.1	protein_coding	1	c.773-15710C>A
10	52273809	G	T	GATKstd	intron_variant	MODIFIER	NRXN1	474589	transcript	XM_005626098.2	protein_coding	4	c.833-15710C>A
10	52273809	G	T	GATKstd	intron_variant	MODIFIER	NRXN1	474589	transcript	XM_005626100.2	protein_coding	4	c.833-15710C>A
10	52273809	G	T	GATKstd	intron_variant	MODIFIER	NRXN1	474589	transcript	XM_005626101.2	protein_coding	3	c.821-15710C>A
10	52273809	G	T	GATKstd	intron_variant	MODIFIER	NRXN1	474589	transcript	XM_022424710.1	protein_coding	4	c.830-15710C>A
10	52273809	G	T	GATKstd	intron_variant	MODIFIER	NRXN1	474589	transcript	XM_022424711.1	protein_coding	4	c.833-15710C>A
10	52273809	G	T	GATKstd	intron_variant	MODIFIER	NRXN1	474589	transcript	XM_022424712.1	protein_coding	3	c.821-15710C>A
10	52273809	G	T	GATKstd	intron_variant	MODIFIER	NRXN1	474589	transcript	XM_022424713.1	protein_coding	4	c.833-15710C>A
10	52273809	G	T	GATKstd	intron_variant	MODIFIER	NRXN1	474589	transcript	XM_022424714.1	protein_coding	4	c.833-15710C>A
10	52273809	G	T	GATKstd	intron_variant	MODIFIER	NRXN1	474589	transcript	XM_022424715.1	protein_coding	4	c.833-15710C>A
10	52273809	G	T	GATKstd	intron_variant	MODIFIER	NRXN1	474589	transcript	XM_022424716.1	protein_coding	4	c.833-15710C>A
10	52273809	G	T	GATKstd	intron_variant	MODIFIER	NRXN1	474589	transcript	XM_022424717.1	protein_coding	4	c.833-15710C>A
10	52273809	G	T	GATKstd	intron_variant	MODIFIER	NRXN1	474589	transcript	XM_022424718.1	protein_coding	2	c.803-15710C>A
10	52273809	G	T	GATKstd	intron_variant	MODIFIER	NRXN1	474589	transcript	XM_022424719.1	protein_coding	1	c.773-15710C>A
10	52273809	G	T	GATKstd	intron_variant	MODIFIER	NRXN1	474589	transcript	XM_022424720.1	protein_coding	1	c.773-15710C>A
10	52273809	G	T	GATKstd	intron_variant	MODIFIER	NRXN1	474589	transcript	XM_531818.5	protein_coding	4	c.833-15710C>A
10	52273809	G	T	GATKstd	intron_variant	MODIFIER	NRXN1	474589	transcript	XM_022424721.1	protein_coding	4	c.833-15710C>A
10	52687588	TTTTTTTTTTTTTA	T	PASS	intergenic_region	MODIFIER	LOC102157367-LOC100683314	102157367-100683314	intergenic_region	102157367-100683314		-1	n.52687589_52687601delTTTTTTTTTTTTA
10	53159191	T	C	GATKstd	intergenic_region	MODIFIER	LOC100683314-LOC100688606	100683314-100688606	intergenic_region	100683314-100688606		-1	n.53159191T>C
10	53443209	C	T	GATKstd	intergenic_region	MODIFIER	LOC100683314-LOC100688606	100683314-100688606	intergenic_region	100683314-100688606		-1	n.53443209C>T
10	53443211	G	T	GATKstd	intergenic_region	MODIFIER	LOC100683314-LOC100688606	100683314-100688606	intergenic_region	100683314-100688606		-1	n.53443211G>T
10	53751352	C	T	GATKstd	intergenic_region	MODIFIER	LOC100683314-LOC100688606	100683314-100688606	intergenic_region	100683314-100688606		-1	n.53751352C>T
10	53883033	TGAA	T	PASS	intergenic_region	MODIFIER	LOC100683314-LOC100688606	100683314-100688606	intergenic_region	100683314-100688606		-1	n.53883034_53883036delGAA
10	53883038	TGAAAC	T	PASS	intergenic_region	MODIFIER	LOC100683314-LOC100688606	100683314-100688606	intergenic_region	100683314-100688606		-1	n.53883039_53883043delGAAAC
10	53883043	C	CTTTTTTTT	PASS	intergenic_region	MODIFIER	LOC100683314-LOC100688606	100683314-100688606	intergenic_region	100683314-100688606		-1	n.53883043_53883044insTTTTTTTT
10	55443286	G	GT	GATKIndelStd	intron_variant	MODIFIER	SPTBN1	403743	transcript	XM_022424749.1	protein_coding	1	c.148+13150_148+13151insT
10	57135334	ATCTG	A	PASS	intergenic_region	MODIFIER	LOC102154028-LOC102154143	102154028-102154143	intergenic_region	102154028-102154143		-1	n.57135335_57135338delTCTG
10	58345597	T	A	PASS	intergenic_region	MODIFIER	LOC111097763-VRK2	111097763-474605	intergenic_region	111097763-474605		-1	n.58345597T>A
10	58447650	T	A	GATKstd	intron_variant	MODIFIER	VRK2	474605	transcript	XM_005626121.3	protein_coding	3	c.136+13725T>A
10	59048900	A	G	GATKstd	intron_variant	MODIFIER	LOC102154583	102154583	transcript	XR_002630845.1	pseudogene	5	n.525+7400A>G
10	59093350	C	CT	PASS	intron_variant	MODIFIER	LOC102154583	102154583	transcript	XR_002630845.1	pseudogene	6	n.676+4708_676+4709insT
10	60745613	T	TA	PASS	intergenic_region	MODIFIER	BCL11A-LOC106559422	481381-106559422	intergenic_region	481381-106559422		-1	n.60745613_60745614insA
10	61134386	G	A	GATKstd	downstream_gene_variant	MODIFIER	PEX13	474607	transcript	XM_005626123.3	protein_coding	-1	c.*6804G>A
10	61134386	G	A	GATKstd	intergenic_region	MODIFIER	PEX13-KIAA1841	474607-481384	intergenic_region	474607-481384		-1	n.61134386G>A
10	61928936	A	T	GATKstd	intron_variant	MODIFIER	COMMD1	403590	transcript	NM_001003055.1	protein_coding	1	c.178-38025A>T
10	62128915	T	C	GATKstd	intron_variant	MODIFIER	B3GNT2	474611	transcript	XM_005626144.2	protein_coding	1	c.-10+6592T>C
10	62128915	T	C	GATKstd	intron_variant	MODIFIER	B3GNT2	474611	transcript	XM_531841.6	protein_coding	1	c.-10+10251T>C
10	62388478	T	A	GATKstd	intron_variant	MODIFIER	LOC111097779	111097779	transcript	XR_002630907.1	pseudogene	2	n.342-6010T>A
10	62388478	T	A	GATKstd	intron_variant	MODIFIER	LOC111097779	111097779	transcript	XR_002630908.1	pseudogene	2	n.341-6010T>A
10	66830219	G	A	GATKstd	intergenic_region	MODIFIER	LOC102155303-LOC106559424	102155303-106559424	intergenic_region	102155303-106559424		-1	n.66830219G>A
10	66857477	T	G	GATKstd	intergenic_region	MODIFIER	LOC102155303-LOC106559424	102155303-106559424	intergenic_region	102155303-106559424		-1	n.66857477T>G
10	66878179	C	T	GATKstd	intergenic_region	MODIFIER	LOC102155303-LOC106559424	102155303-106559424	intergenic_region	102155303-106559424		-1	n.66878179C>T
10	67146341	G	A	PASS	intergenic_region	MODIFIER	LOC100683563-C1D	100683563-612549	intergenic_region	100683563-612549		-1	n.67146341G>A
10	67244848	G	A	GATKstd	downstream_gene_variant	MODIFIER	PNO1	474623	transcript	XM_531853.5	protein_coding	-1	c.*3430G>A
10	67244848	G	A	GATKstd	intron_variant	MODIFIER	PPP3R1	612559	transcript	XM_850290.5	protein_coding	5	c.511-175C>T
10	67244848	G	A	GATKstd	intron_variant	MODIFIER	PPP3R1	612559	transcript	XM_005626174.3	protein_coding	5	c.484-175C>T
10	67413934	C	T	GATKstd	upstream_gene_variant	MODIFIER	LOC111097806	111097806	transcript	XR_002630962.1	pseudogene	-1	n.-3036G>A
10	67413934	C	T	GATKstd	intron_variant	MODIFIER	PLEK	442956	transcript	NM_001003363.2	protein_coding	6	c.762+1192C>T
10	67433930	C	T	GATKstd	intergenic_region	MODIFIER	PLEK-FBXO48	442956-100684024	intergenic_region	442956-100684024		-1	n.67433930C>T
10	68493021	A	T	GATKstd	intron_variant	MODIFIER	GMCL1	481414	transcript	XM_538534.6	protein_coding	9	c.1084+1031A>T
10	68588677	C	CCCCCTCCA	PASS	intron_variant	MODIFIER	ASPRV1	481416	transcript	XM_014117456.1	protein_coding	1	c.188-787_188-786insTGGAGGGG
10	68693347	G	A	PASS	downstream_gene_variant	MODIFIER	LOC111097866	111097866	transcript	XR_002631067.1	pseudogene	-1	n.*343G>A
10	68693347	G	A	PASS	intergenic_region	MODIFIER	LOC111097866-LOC102151723	111097866-102151723	intergenic_region	111097866-102151723		-1	n.68693347G>A
10	69110303	G	A	PASS	intergenic_region	MODIFIER	ADD2-FIGLA	610670-100687488	intergenic_region	610670-100687488		-1	n.69110303G>A
10	69110575	C	T	PASS	intergenic_region	MODIFIER	ADD2-FIGLA	610670-100687488	intergenic_region	610670-100687488		-1	n.69110575C>T
10	69191460	C	T	PASS	upstream_gene_variant	MODIFIER	CD207	612679	transcript	XM_850409.2	protein_coding	-1	c.-1171G>A
10	69191460	C	T	PASS	intergenic_region	MODIFIER	CD207-VAX2	612679-106559406	intergenic_region	612679-106559406		-1	n.69191460C>T
11	214306	A	C	GATKstd	upstream_gene_variant	MODIFIER	LOC111097973	111097973	transcript	XR_002631206.1	pseudogene	-1	n.-1665A>C
11	214306	A	C	GATKstd	intron_variant	MODIFIER	LOC111097912	111097912	transcript	XR_002631143.1	pseudogene	2	n.161+695T>G
11	827251	C	T	PASS	upstream_gene_variant	MODIFIER	IFGGC1	481471	transcript	NM_001313803.1	protein_coding	-1	c.-11151C>T
11	827251	C	T	PASS	intergenic_region	MODIFIER	LOC481472-IFGGC1	481472-481471	intergenic_region	481472-481471		-1	n.827251C>T
11	964631	G	T	GATKstd	intergenic_region	MODIFIER	LOC100684769-COR2AI2	100684769-481468	intergenic_region	100684769-481468		-1	n.964631G>T
11	2044493	G	A	PASS	intergenic_region	MODIFIER	CBY3-HNRNPH1	481456-481455	intergenic_region	481456-481455		-1	n.2044493G>A
11	2044495	A	G	PASS	intergenic_region	MODIFIER	CBY3-HNRNPH1	481456-481455	intergenic_region	481456-481455		-1	n.2044495A>G
11	2044508	A	C	GATKstd	intergenic_region	MODIFIER	CBY3-HNRNPH1	481456-481455	intergenic_region	481456-481455		-1	n.2044508A>C
11	3440170	G	T	GATKstd	intergenic_region	MODIFIER	N4BP3-B4GALT7	481446-481445	intergenic_region	481446-481445		-1	n.3440170G>T
11	3440182	A	T	GATKstd	intergenic_region	MODIFIER	N4BP3-B4GALT7	481446-481445	intergenic_region	481446-481445		-1	n.3440182A>T
11	3950016	C	T	GATKstd	intron_variant	MODIFIER	LOC111097982	111097982	transcript	XR_002631226.1	pseudogene	6	n.801-15213C>T
11	3950016	C	T	GATKstd	intron_variant	MODIFIER	LOC111097982	111097982	transcript	XR_002631225.1	pseudogene	6	n.791-15213C>T
11	3950016	C	T	GATKstd	intron_variant	MODIFIER	LOC111097982	111097982	transcript	XR_002631227.1	pseudogene	5	n.685-15213C>T
11	3950017	A	G	GATKstd	intron_variant	MODIFIER	LOC111097982	111097982	transcript	XR_002631226.1	pseudogene	6	n.801-15212A>G
11	3950017	A	G	GATKstd	intron_variant	MODIFIER	LOC111097982	111097982	transcript	XR_002631225.1	pseudogene	6	n.791-15212A>G
11	3950017	A	G	GATKstd	intron_variant	MODIFIER	LOC111097982	111097982	transcript	XR_002631227.1	pseudogene	5	n.685-15212A>G
11	5021416	C	T	GATKstd	upstream_gene_variant	MODIFIER	PGGT1B	481440	transcript	XM_538560.5	protein_coding	-1	c.-943G>A
11	5021416	C	T	GATKstd	upstream_gene_variant	MODIFIER	PGGT1B	481440	transcript	XM_005626320.3	protein_coding	-1	c.-1506G>A
11	5021416	C	T	GATKstd	upstream_gene_variant	MODIFIER	PGGT1B	481440	transcript	XM_005626321.2	protein_coding	-1	c.-959G>A
11	5021416	C	T	GATKstd	downstream_gene_variant	MODIFIER	CCDC112	474638	transcript	XM_022425043.1	protein_coding	-1	c.*4722G>A
11	5021416	C	T	GATKstd	intergenic_region	MODIFIER	PGGT1B-CCDC112	481440-474638	intergenic_region	481440-474638		-1	n.5021416C>T
11	5021418	G	C	GATKstd	upstream_gene_variant	MODIFIER	PGGT1B	481440	transcript	XM_538560.5	protein_coding	-1	c.-945C>G
11	5021418	G	C	GATKstd	upstream_gene_variant	MODIFIER	PGGT1B	481440	transcript	XM_005626320.3	protein_coding	-1	c.-1508C>G
11	5021418	G	C	GATKstd	upstream_gene_variant	MODIFIER	PGGT1B	481440	transcript	XM_005626321.2	protein_coding	-1	c.-961C>G
11	5021418	G	C	GATKstd	downstream_gene_variant	MODIFIER	CCDC112	474638	transcript	XM_022425043.1	protein_coding	-1	c.*4720C>G
11	5021418	G	C	GATKstd	intergenic_region	MODIFIER	PGGT1B-CCDC112	481440-474638	intergenic_region	481440-474638		-1	n.5021418G>C
11	5021420	G	C	GATKstd	upstream_gene_variant	MODIFIER	PGGT1B	481440	transcript	XM_538560.5	protein_coding	-1	c.-947C>G
11	5021420	G	C	GATKstd	upstream_gene_variant	MODIFIER	PGGT1B	481440	transcript	XM_005626320.3	protein_coding	-1	c.-1510C>G
11	5021420	G	C	GATKstd	upstream_gene_variant	MODIFIER	PGGT1B	481440	transcript	XM_005626321.2	protein_coding	-1	c.-963C>G
11	5021420	G	C	GATKstd	downstream_gene_variant	MODIFIER	CCDC112	474638	transcript	XM_022425043.1	protein_coding	-1	c.*4718C>G
11	5021420	G	C	GATKstd	intergenic_region	MODIFIER	PGGT1B-CCDC112	481440-474638	intergenic_region	481440-474638		-1	n.5021420G>C
11	5021421	T	C	GATKstd	upstream_gene_variant	MODIFIER	PGGT1B	481440	transcript	XM_538560.5	protein_coding	-1	c.-948A>G
11	5021421	T	C	GATKstd	upstream_gene_variant	MODIFIER	PGGT1B	481440	transcript	XM_005626320.3	protein_coding	-1	c.-1511A>G
11	5021421	T	C	GATKstd	upstream_gene_variant	MODIFIER	PGGT1B	481440	transcript	XM_005626321.2	protein_coding	-1	c.-964A>G
11	5021421	T	C	GATKstd	downstream_gene_variant	MODIFIER	CCDC112	474638	transcript	XM_022425043.1	protein_coding	-1	c.*4717A>G
11	5021421	T	C	GATKstd	intergenic_region	MODIFIER	PGGT1B-CCDC112	481440-474638	intergenic_region	481440-474638		-1	n.5021421T>C
11	5299302	TCAAAG	T	PASS	intergenic_region	MODIFIER	LOC100687002-TICAM2	100687002-100533188	intergenic_region	100687002-100533188		-1	n.5299303_5299307delCAAAG
11	5299307	G	GTTTTT	PASS	intergenic_region	MODIFIER	LOC100687002-TICAM2	100687002-100533188	intergenic_region	100687002-100533188		-1	n.5299307_5299308insTTTTT
11	5299309	A	T	PASS	intergenic_region	MODIFIER	LOC100687002-TICAM2	100687002-100533188	intergenic_region	100687002-100533188		-1	n.5299309A>T
11	5299311	A	T	PASS	intergenic_region	MODIFIER	LOC100687002-TICAM2	100687002-100533188	intergenic_region	100687002-100533188		-1	n.5299311A>T
11	5485134	ATCTT	A	GATKIndelStd	intron_variant	MODIFIER	LOC111097989	111097989	transcript	XR_002631245.1	pseudogene	2	n.1519-2168_1519-2165delAAGA
11	5485134	ATCTT	A	GATKIndelStd	intron_variant	MODIFIER	LOC111097989	111097989	transcript	XR_002631246.1	pseudogene	2	n.1518+2623_1518+2626delAAGA
11	6951164	T	C	GATKstd	intergenic_region	MODIFIER	LOC111097915-LOC111097917	111097915-111097917	intergenic_region	111097915-111097917		-1	n.6951164T>C
11	7500494	AG	A	PASS	intergenic_region	MODIFIER	LOC111097917-LOC100687242	111097917-100687242	intergenic_region	111097917-100687242		-1	n.7500495delG
11	8290391	C	T	GATKstd	intron_variant	MODIFIER	DTWD2	608190	transcript	XM_022425142.1	protein_coding	4	c.484-20213G>A
11	8290391	C	T	GATKstd	intron_variant	MODIFIER	DTWD2	608190	transcript	XR_002631266.1	pseudogene	4	n.508-20213G>A
11	8290391	C	T	GATKstd	intron_variant	MODIFIER	DTWD2	608190	transcript	XR_002631265.1	pseudogene	4	n.508-20213G>A
11	8290391	C	T	GATKstd	intron_variant	MODIFIER	DTWD2	608190	transcript	XR_002631264.1	pseudogene	4	n.508-20213G>A
11	8962511	TAA	T	PASS	intergenic_region	MODIFIER	LOC481426-LOC111097919	481426-111097919	intergenic_region	481426-111097919		-1	n.8962512_8962513delAA
11	8962514	TCTGTGG	T	PASS	intergenic_region	MODIFIER	LOC481426-LOC111097919	481426-111097919	intergenic_region	481426-111097919		-1	n.8962515_8962520delCTGTGG
11	9633145	T	C	GATKstd	intergenic_region	MODIFIER	LOC111097996-LOC111097921	111097996-111097921	intergenic_region	111097996-111097921		-1	n.9633145T>C
11	10196729	C	T	PASS	intergenic_region	MODIFIER	PRR16-LOC100686900	100686740-100686900	intergenic_region	100686740-100686900		-1	n.10196729C>T
11	10217371	C	G	PASS	intergenic_region	MODIFIER	PRR16-LOC100686900	100686740-100686900	intergenic_region	100686740-100686900		-1	n.10217371C>G
11	11131287	C	G	GATKstd	downstream_gene_variant	MODIFIER	LOC102155594	102155594	transcript	XM_022425186.1	protein_coding	-1	c.*5002C>G
11	11131287	C	G	GATKstd	downstream_gene_variant	MODIFIER	LOC102155594	102155594	transcript	XM_022425188.1	protein_coding	-1	c.*5002C>G
11	11131287	C	G	GATKstd	downstream_gene_variant	MODIFIER	LOC102155594	102155594	transcript	XM_022425193.1	protein_coding	-1	c.*5002C>G
11	11131287	C	G	GATKstd	downstream_gene_variant	MODIFIER	LOC102155594	102155594	transcript	XM_022425189.1	protein_coding	-1	c.*5002C>G
11	11131287	C	G	GATKstd	downstream_gene_variant	MODIFIER	LOC102155594	102155594	transcript	XM_022425191.1	protein_coding	-1	c.*5002C>G
11	11131287	C	G	GATKstd	downstream_gene_variant	MODIFIER	LOC102155594	102155594	transcript	XM_022425192.1	protein_coding	-1	c.*5002C>G
11	11131287	C	G	GATKstd	downstream_gene_variant	MODIFIER	LOC102155594	102155594	transcript	XM_022425187.1	protein_coding	-1	c.*5002C>G
11	11131287	C	G	GATKstd	intron_variant	MODIFIER	LOC102151636	102151636	transcript	XM_022425180.1	protein_coding	8	c.836-192612G>C
11	11131287	C	G	GATKstd	intron_variant	MODIFIER	LOC102151636	102151636	transcript	XM_022425182.1	protein_coding	7	c.746-192612G>C
11	11131287	C	G	GATKstd	intron_variant	MODIFIER	LOC102151636	102151636	transcript	XM_022425181.1	protein_coding	8	c.836-192612G>C
11	11371192	TAACA	T	PASS	intron_variant	MODIFIER	LOC102151636	102151636	transcript	XM_022425180.1	protein_coding	8	c.835+41972_835+41975delTGTT
11	11371192	TAACA	T	PASS	intron_variant	MODIFIER	LOC102151636	102151636	transcript	XM_022425182.1	protein_coding	7	c.745+41972_745+41975delTGTT
11	11371192	TAACA	T	PASS	intron_variant	MODIFIER	LOC102151636	102151636	transcript	XM_022425181.1	protein_coding	8	c.835+41972_835+41975delTGTT
11	11689417	G	C	GATKstd	intergenic_region	MODIFIER	LOC111097923-LOC111097998	111097923-111097998	intergenic_region	111097923-111097998		-1	n.11689417G>C
11	12104139	T	A	GATKstd	intron_variant	MODIFIER	LOC474655	474655	transcript	XM_005626440.3	protein_coding	1	c.-212-12348T>A
11	12104139	T	A	GATKstd	intron_variant	MODIFIER	LOC474655	474655	transcript	XM_022425200.1	protein_coding	1	c.-212-12348T>A
11	12104139	T	A	GATKstd	intron_variant	MODIFIER	LOC474655	474655	transcript	XM_022425201.1	protein_coding	1	c.-212-12348T>A
11	12104139	T	A	GATKstd	intron_variant	MODIFIER	LOC474655	474655	transcript	XM_022425202.1	protein_coding	1	c.-212-12348T>A
11	12104139	T	A	GATKstd	intron_variant	MODIFIER	LOC474655	474655	transcript	XR_001317255.2	pseudogene	1	n.159-12348T>A
11	12104139	T	A	GATKstd	intron_variant	MODIFIER	LOC474655	474655	transcript	XM_005626442.3	protein_coding	1	c.-212-12348T>A
11	12104139	T	A	GATKstd	intron_variant	MODIFIER	LOC474655	474655	transcript	XM_022425197.1	protein_coding	1	c.-324-7110T>A
11	12104139	T	A	GATKstd	intron_variant	MODIFIER	LOC474655	474655	transcript	XM_022425199.1	protein_coding	2	c.-213+6711T>A
11	13164590	C	T	GATKstd	intergenic_region	MODIFIER	PRDM6-CEP120	100687856-474659	intergenic_region	100687856-474659		-1	n.13164590C>T
11	14901652	C	T	PASS	5_prime_UTR_variant	MODIFIER	LOC106559535	106559535	transcript	XM_022425228.1	protein_coding	2	c.-227G>A
11	14901652	C	T	PASS	5_prime_UTR_variant	MODIFIER	LOC106559535	106559535	transcript	XM_022425231.1	protein_coding	2	c.-227G>A
11	14901652	C	T	PASS	intron_variant	MODIFIER	LOC106559535	106559535	transcript	XM_022425229.1	protein_coding	1	c.-123-38570G>A
11	14901652	C	T	PASS	non_coding_transcript_exon_variant	MODIFIER	LOC106559535	106559535	transcript	XR_002631300.1	pseudogene	2	n.512G>A
11	15170091	AT	A	PASS	intergenic_region	MODIFIER	LOC111098006-609022	111098006-609022	intergenic_region	111098006-609022		-1	n.15170092delT
11	15706475	C	T	GATKstd	intron_variant	MODIFIER	GRAMD2B	474662	transcript	XM_005626468.3	protein_coding	1	c.125+32402C>T
11	16187353	G	A	GATKstd	downstream_gene_variant	MODIFIER	LOC111098008	111098008	transcript	XR_002631307.1	pseudogene	-1	n.*3077G>A
11	16187353	G	A	GATKstd	downstream_gene_variant	MODIFIER	LOC111098008	111098008	transcript	XR_002631308.1	pseudogene	-1	n.*2221G>A
11	16187353	G	A	GATKstd	intron_variant	MODIFIER	MARCH3	481488	transcript	XM_538609.6	protein_coding	1	c.-57+26133C>T
11	16187353	G	A	GATKstd	intron_variant	MODIFIER	LOC111098008	111098008	transcript	XR_002631306.1	pseudogene	4	n.3207+3798G>A
11	16187353	G	A	GATKstd	intron_variant	MODIFIER	LOC111098008	111098008	transcript	XR_002631305.1	pseudogene	3	n.3076+3798G>A
11	16221965	T	A	GATKstd	downstream_gene_variant	MODIFIER	C11H5orf63	100684721	transcript	XM_022425236.1	protein_coding	-1	c.*4735A>T
11	16221965	T	A	GATKstd	downstream_gene_variant	MODIFIER	C11H5orf63	100684721	transcript	XM_022425244.1	protein_coding	-1	c.*2588A>T
11	16221965	T	A	GATKstd	downstream_gene_variant	MODIFIER	C11H5orf63	100684721	transcript	XM_022425242.1	protein_coding	-1	c.*10775A>T
11	16221965	T	A	GATKstd	downstream_gene_variant	MODIFIER	C11H5orf63	100684721	transcript	XM_022425237.1	protein_coding	-1	c.*4735A>T
11	16221965	T	A	GATKstd	downstream_gene_variant	MODIFIER	C11H5orf63	100684721	transcript	XM_022425239.1	protein_coding	-1	c.*4735A>T
11	16221965	T	A	GATKstd	downstream_gene_variant	MODIFIER	C11H5orf63	100684721	transcript	XM_022425240.1	protein_coding	-1	c.*4735A>T
11	16221965	T	A	GATKstd	downstream_gene_variant	MODIFIER	C11H5orf63	100684721	transcript	XM_022425243.1	protein_coding	-1	c.*10775A>T
11	16221965	T	A	GATKstd	non_coding_transcript_exon_variant	MODIFIER	LOC111098009	111098009	transcript	XR_002631309.1	pseudogene	3	n.375T>A
11	16225635	A	G	GATKstd	downstream_gene_variant	MODIFIER	LOC111098009	111098009	transcript	XR_002631309.1	pseudogene	-1	n.*3589A>G
11	16225635	A	G	GATKstd	downstream_gene_variant	MODIFIER	C11H5orf63	100684721	transcript	XM_022425236.1	protein_coding	-1	c.*1065T>C
11	16225635	A	G	GATKstd	downstream_gene_variant	MODIFIER	C11H5orf63	100684721	transcript	XM_022425237.1	protein_coding	-1	c.*1065T>C
11	16225635	A	G	GATKstd	downstream_gene_variant	MODIFIER	C11H5orf63	100684721	transcript	XM_022425239.1	protein_coding	-1	c.*1065T>C
11	16225635	A	G	GATKstd	downstream_gene_variant	MODIFIER	C11H5orf63	100684721	transcript	XM_022425240.1	protein_coding	-1	c.*1065T>C
11	16225635	A	G	GATKstd	downstream_gene_variant	MODIFIER	C11H5orf63	100684721	transcript	XM_022425243.1	protein_coding	-1	c.*7105T>C
11	16225635	A	G	GATKstd	intron_variant	MODIFIER	C11H5orf63	100684721	transcript	XM_022425244.1	protein_coding	4	c.279-1049T>C
11	16225635	A	G	GATKstd	intron_variant	MODIFIER	C11H5orf63	100684721	transcript	XM_022425242.1	protein_coding	4	c.*7-1049T>C
11	16300722	G	A	GATKstd	intron_variant	MODIFIER	LOC111098010	111098010	transcript	XR_002631310.1	pseudogene	2	n.279-8809G>A
11	16515614	TTAAGA	T	PASS	intron_variant	MODIFIER	MEGF10	474665	transcript	XM_022425235.1	protein_coding	10	c.947+1543_947+1547delTAAGA
11	16515614	TTAAGA	T	PASS	intron_variant	MODIFIER	MEGF10	474665	transcript	XM_531893.6	protein_coding	8	c.917+1543_917+1547delTAAGA
11	16515614	TTAAGA	T	PASS	intron_variant	MODIFIER	MEGF10	474665	transcript	XM_005626476.3	protein_coding	8	c.917+1543_917+1547delTAAGA
11	16515614	TTAAGA	T	PASS	intron_variant	MODIFIER	MEGF10	474665	transcript	XM_005626478.3	protein_coding	8	c.917+1543_917+1547delTAAGA
11	16515614	TTAAGA	T	PASS	intron_variant	MODIFIER	MEGF10	474665	transcript	XM_022425234.1	protein_coding	8	c.917+1543_917+1547delTAAGA
11	16515614	TTAAGA	T	PASS	intron_variant	MODIFIER	MEGF10	474665	transcript	XM_014117690.2	protein_coding	8	c.917+1543_917+1547delTAAGA
11	16515614	TTAAGA	T	PASS	intron_variant	MODIFIER	MEGF10	474665	transcript	XM_014117691.2	protein_coding	8	c.917+1543_917+1547delTAAGA
11	16567420	G	A	GATKstd	intron_variant	MODIFIER	MEGF10	474665	transcript	XM_022425235.1	protein_coding	26	c.3263-89G>A
11	16567420	G	A	GATKstd	intron_variant	MODIFIER	MEGF10	474665	transcript	XM_531893.6	protein_coding	24	c.3233-89G>A
11	16567420	G	A	GATKstd	intron_variant	MODIFIER	MEGF10	474665	transcript	XM_005626476.3	protein_coding	24	c.3233-89G>A
11	16567420	G	A	GATKstd	intron_variant	MODIFIER	MEGF10	474665	transcript	XM_005626478.3	protein_coding	24	c.3233-650G>A
11	16567420	G	A	GATKstd	intron_variant	MODIFIER	MEGF10	474665	transcript	XM_022425234.1	protein_coding	24	c.3232+1372G>A
11	16567420	G	A	GATKstd	intron_variant	MODIFIER	MEGF10	474665	transcript	XM_014117690.2	protein_coding	24	c.3233-89G>A
11	16567420	G	A	GATKstd	intron_variant	MODIFIER	MEGF10	474665	transcript	XM_014117691.2	protein_coding	24	c.3233-89G>A
11	16572334	T	C	GATKstd	downstream_gene_variant	MODIFIER	MEGF10	474665	transcript	XM_022425235.1	protein_coding	-1	c.*4644T>C
11	16572334	T	C	GATKstd	downstream_gene_variant	MODIFIER	MEGF10	474665	transcript	XM_531893.6	protein_coding	-1	c.*4644T>C
11	16572334	T	C	GATKstd	downstream_gene_variant	MODIFIER	MEGF10	474665	transcript	XM_005626476.3	protein_coding	-1	c.*4644T>C
11	16572334	T	C	GATKstd	downstream_gene_variant	MODIFIER	MEGF10	474665	transcript	XM_005626478.3	protein_coding	-1	c.*4233T>C
11	16572334	T	C	GATKstd	downstream_gene_variant	MODIFIER	MEGF10	474665	transcript	XM_014117690.2	protein_coding	-1	c.*4644T>C
11	16572334	T	C	GATKstd	downstream_gene_variant	MODIFIER	MEGF10	474665	transcript	XM_014117691.2	protein_coding	-1	c.*4644T>C
11	16572334	T	C	GATKstd	intron_variant	MODIFIER	MEGF10	474665	transcript	XM_022425234.1	protein_coding	24	c.3233-1918T>C
11	16588486	T	C	GATKstd	intergenic_region	MODIFIER	MEGF10-PRRC1	474665-481489	intergenic_region	474665-481489		-1	n.16588486T>C
11	17134579	C	A	GATKstd	intergenic_region	MODIFIER	LOC111098011-SLC12A2	111098011-481490	intergenic_region	111098011-481490		-1	n.17134579C>A
11	18229621	G	T	GATKstd	intron_variant	MODIFIER	LOC111098014	111098014	transcript	XR_002631322.1	pseudogene	5	n.748-8687G>T
11	19518250	G	A	PASS	downstream_gene_variant	MODIFIER	LOC100685666	100685666	transcript	100685666	pseudogene	-1	n.*4710C>T
11	19518250	G	A	PASS	intergenic_region	MODIFIER	LOC100688508-LOC100685666	100688508-100685666	intergenic_region	100688508-100685666		-1	n.19518250G>A
11	19875511	C	A	PASS	intron_variant	MODIFIER	RAPGEF6	609521	transcript	XM_014117697.2	protein_coding	6	c.496-8012G>T
11	19875511	C	A	PASS	intron_variant	MODIFIER	RAPGEF6	609521	transcript	XM_014117702.2	protein_coding	1	c.54+3620G>T
11	19875511	C	A	PASS	intron_variant	MODIFIER	RAPGEF6	609521	transcript	XM_846793.5	protein_coding	6	c.496-8012G>T
11	19875511	C	A	PASS	intron_variant	MODIFIER	RAPGEF6	609521	transcript	XM_022425256.1	protein_coding	6	c.394-8012G>T
11	19875511	C	A	PASS	intron_variant	MODIFIER	RAPGEF6	609521	transcript	XM_014117698.2	protein_coding	6	c.496-8012G>T
11	19875511	C	A	PASS	intron_variant	MODIFIER	RAPGEF6	609521	transcript	XM_003431622.4	protein_coding	6	c.496-8012G>T
11	19875511	C	A	PASS	intron_variant	MODIFIER	RAPGEF6	609521	transcript	XM_014117699.2	protein_coding	5	c.352-8012G>T
11	19875511	C	A	PASS	intron_variant	MODIFIER	RAPGEF6	609521	transcript	XM_014117701.2	protein_coding	6	c.496-8012G>T
11	19875511	C	A	PASS	intron_variant	MODIFIER	RAPGEF6	609521	transcript	XM_003431625.4	protein_coding	6	c.496-8012G>T
11	19875511	C	A	PASS	intron_variant	MODIFIER	RAPGEF6	609521	transcript	XM_014117703.2	protein_coding	6	c.496-8012G>T
11	19875511	C	A	PASS	intron_variant	MODIFIER	RAPGEF6	609521	transcript	XM_005626500.3	protein_coding	6	c.496-8012G>T
11	19875513	T	A	GATKstd	intron_variant	MODIFIER	RAPGEF6	609521	transcript	XM_014117697.2	protein_coding	6	c.496-8014A>T
11	19875513	T	A	GATKstd	intron_variant	MODIFIER	RAPGEF6	609521	transcript	XM_014117702.2	protein_coding	1	c.54+3618A>T
11	19875513	T	A	GATKstd	intron_variant	MODIFIER	RAPGEF6	609521	transcript	XM_846793.5	protein_coding	6	c.496-8014A>T
11	19875513	T	A	GATKstd	intron_variant	MODIFIER	RAPGEF6	609521	transcript	XM_022425256.1	protein_coding	6	c.394-8014A>T
11	19875513	T	A	GATKstd	intron_variant	MODIFIER	RAPGEF6	609521	transcript	XM_014117698.2	protein_coding	6	c.496-8014A>T
11	19875513	T	A	GATKstd	intron_variant	MODIFIER	RAPGEF6	609521	transcript	XM_003431622.4	protein_coding	6	c.496-8014A>T
11	19875513	T	A	GATKstd	intron_variant	MODIFIER	RAPGEF6	609521	transcript	XM_014117699.2	protein_coding	5	c.352-8014A>T
11	19875513	T	A	GATKstd	intron_variant	MODIFIER	RAPGEF6	609521	transcript	XM_014117701.2	protein_coding	6	c.496-8014A>T
11	19875513	T	A	GATKstd	intron_variant	MODIFIER	RAPGEF6	609521	transcript	XM_003431625.4	protein_coding	6	c.496-8014A>T
11	19875513	T	A	GATKstd	intron_variant	MODIFIER	RAPGEF6	609521	transcript	XM_014117703.2	protein_coding	6	c.496-8014A>T
11	19875513	T	A	GATKstd	intron_variant	MODIFIER	RAPGEF6	609521	transcript	XM_005626500.3	protein_coding	6	c.496-8014A>T
11	19892729	T	A	GATKstd	intron_variant	MODIFIER	RAPGEF6	609521	transcript	XM_014117697.2	protein_coding	6	c.495+7712A>T
11	19892729	T	A	GATKstd	intron_variant	MODIFIER	RAPGEF6	609521	transcript	XM_846793.5	protein_coding	6	c.495+7712A>T
11	19892729	T	A	GATKstd	intron_variant	MODIFIER	RAPGEF6	609521	transcript	XM_022425256.1	protein_coding	6	c.393+7712A>T
11	19892729	T	A	GATKstd	intron_variant	MODIFIER	RAPGEF6	609521	transcript	XM_014117698.2	protein_coding	6	c.495+7712A>T
11	19892729	T	A	GATKstd	intron_variant	MODIFIER	RAPGEF6	609521	transcript	XM_003431622.4	protein_coding	6	c.495+7712A>T
11	19892729	T	A	GATKstd	intron_variant	MODIFIER	RAPGEF6	609521	transcript	XM_014117699.2	protein_coding	5	c.352-25230A>T
11	19892729	T	A	GATKstd	intron_variant	MODIFIER	RAPGEF6	609521	transcript	XM_014117701.2	protein_coding	6	c.495+7712A>T
11	19892729	T	A	GATKstd	intron_variant	MODIFIER	RAPGEF6	609521	transcript	XM_003431625.4	protein_coding	6	c.495+7712A>T
11	19892729	T	A	GATKstd	intron_variant	MODIFIER	RAPGEF6	609521	transcript	XM_014117703.2	protein_coding	6	c.495+7712A>T
11	19892729	T	A	GATKstd	intron_variant	MODIFIER	RAPGEF6	609521	transcript	XM_005626500.3	protein_coding	6	c.495+7712A>T
11	20486392	T	C	GATKstd	intergenic_region	MODIFIER	CSF2-P4HA2	403923-474672	intergenic_region	403923-474672		-1	n.20486392T>C
11	20486394	T	C	GATKstd	intergenic_region	MODIFIER	CSF2-P4HA2	403923-474672	intergenic_region	403923-474672		-1	n.20486394T>C
11	20867022	C	CGGA	PASS	intron_variant	MODIFIER	RAD50	474674	transcript	XM_531901.6	protein_coding	5	c.757-7101_757-7100insGGA
11	20867022	C	CGGA	PASS	intron_variant	MODIFIER	RAD50	474674	transcript	XM_022425268.1	protein_coding	5	c.460-7101_460-7100insGGA
11	21424194	TAAG	T	PASS	intergenic_region	MODIFIER	HSPA4-FSTL4	474680-481504	intergenic_region	474680-481504		-1	n.21424195_21424197delAAG
11	21949811	G	C	GATKstd	intergenic_region	MODIFIER	FSTL4-LOC111098026	481504-111098026	intergenic_region	481504-111098026		-1	n.21949811G>C
11	22178687	CAA	C	PASS	downstream_gene_variant	MODIFIER	C11H5orf15	100682619	transcript	XM_005626531.3	protein_coding	-1	c.*2312_*2313delTT
11	22178687	CAA	C	PASS	intergenic_region	MODIFIER	LOC111097929-C11H5orf15	111097929-100682619	intergenic_region	111097929-100682619		-1	n.22178688_22178689delAA
11	22471928	A	AGGGATCCCTGGGTGGCGCAGCGGTTTGGCGCCTGCCTTTGACCCAGGGCGCG	PASS	intron_variant	MODIFIER	CDKL3	608339	transcript	XM_022425290.1	protein_coding	12	c.1687+30_1687+31insCGCGCCCTGGGTCAAAGGCAGGCGCCAAACCGCTGCGCCACCCAGGGATCCC
11	22471928	A	AGGGATCCCTGGGTGGCGCAGCGGTTTGGCGCCTGCCTTTGACCCAGGGCGCG	PASS	intron_variant	MODIFIER	CDKL3	608339	transcript	XM_022425304.1	protein_coding	12	c.1687+30_1687+31insCGCGCCCTGGGTCAAAGGCAGGCGCCAAACCGCTGCGCCACCCAGGGATCCC
11	22471928	A	AGGGATCCCTGGGTGGCGCAGCGGTTTGGCGCCTGCCTTTGACCCAGGGCGCG	PASS	intron_variant	MODIFIER	CDKL3	608339	transcript	XM_022425306.1	protein_coding	11	c.1624+30_1624+31insCGCGCCCTGGGTCAAAGGCAGGCGCCAAACCGCTGCGCCACCCAGGGATCCC
11	22471928	A	AGGGATCCCTGGGTGGCGCAGCGGTTTGGCGCCTGCCTTTGACCCAGGGCGCG	PASS	intron_variant	MODIFIER	CDKL3	608339	transcript	XM_022425297.1	protein_coding	12	c.1687+30_1687+31insCGCGCCCTGGGTCAAAGGCAGGCGCCAAACCGCTGCGCCACCCAGGGATCCC
11	22471928	A	AGGGATCCCTGGGTGGCGCAGCGGTTTGGCGCCTGCCTTTGACCCAGGGCGCG	PASS	intron_variant	MODIFIER	CDKL3	608339	transcript	XM_022425302.1	protein_coding	12	c.1687+30_1687+31insCGCGCCCTGGGTCAAAGGCAGGCGCCAAACCGCTGCGCCACCCAGGGATCCC
11	22471928	A	AGGGATCCCTGGGTGGCGCAGCGGTTTGGCGCCTGCCTTTGACCCAGGGCGCG	PASS	intron_variant	MODIFIER	CDKL3	608339	transcript	XR_002631352.1	pseudogene	12	n.1886+30_1886+31insCGCGCCCTGGGTCAAAGGCAGGCGCCAAACCGCTGCGCCACCCAGGGATCCC
11	22471928	A	AGGGATCCCTGGGTGGCGCAGCGGTTTGGCGCCTGCCTTTGACCCAGGGCGCG	PASS	intron_variant	MODIFIER	CDKL3	608339	transcript	XR_002631353.1	pseudogene	12	n.1886+30_1886+31insCGCGCCCTGGGTCAAAGGCAGGCGCCAAACCGCTGCGCCACCCAGGGATCCC
11	22471928	A	AGGGATCCCTGGGTGGCGCAGCGGTTTGGCGCCTGCCTTTGACCCAGGGCGCG	PASS	intron_variant	MODIFIER	CDKL3	608339	transcript	XM_022425300.1	protein_coding	12	c.1687+30_1687+31insCGCGCCCTGGGTCAAAGGCAGGCGCCAAACCGCTGCGCCACCCAGGGATCCC
11	22471928	A	AGGGATCCCTGGGTGGCGCAGCGGTTTGGCGCCTGCCTTTGACCCAGGGCGCG	PASS	intron_variant	MODIFIER	CDKL3	608339	transcript	XM_022425299.1	protein_coding	12	c.1687+30_1687+31insCGCGCCCTGGGTCAAAGGCAGGCGCCAAACCGCTGCGCCACCCAGGGATCCC
11	22471928	A	AGGGATCCCTGGGTGGCGCAGCGGTTTGGCGCCTGCCTTTGACCCAGGGCGCG	PASS	intron_variant	MODIFIER	CDKL3	608339	transcript	XM_022425305.1	protein_coding	12	c.1687+30_1687+31insCGCGCCCTGGGTCAAAGGCAGGCGCCAAACCGCTGCGCCACCCAGGGATCCC
11	22471928	A	AGGGATCCCTGGGTGGCGCAGCGGTTTGGCGCCTGCCTTTGACCCAGGGCGCG	PASS	intron_variant	MODIFIER	CDKL3	608339	transcript	XM_022425298.1	protein_coding	12	c.1687+30_1687+31insCGCGCCCTGGGTCAAAGGCAGGCGCCAAACCGCTGCGCCACCCAGGGATCCC
11	22471928	A	AGGGATCCCTGGGTGGCGCAGCGGTTTGGCGCCTGCCTTTGACCCAGGGCGCG	PASS	intron_variant	MODIFIER	CDKL3	608339	transcript	XM_022425291.1	protein_coding	12	c.1687+30_1687+31insCGCGCCCTGGGTCAAAGGCAGGCGCCAAACCGCTGCGCCACCCAGGGATCCC
11	22471928	A	AGGGATCCCTGGGTGGCGCAGCGGTTTGGCGCCTGCCTTTGACCCAGGGCGCG	PASS	intron_variant	MODIFIER	CDKL3	608339	transcript	XM_022425292.1	protein_coding	12	c.1687+30_1687+31insCGCGCCCTGGGTCAAAGGCAGGCGCCAAACCGCTGCGCCACCCAGGGATCCC
11	22471928	A	AGGGATCCCTGGGTGGCGCAGCGGTTTGGCGCCTGCCTTTGACCCAGGGCGCG	PASS	intron_variant	MODIFIER	CDKL3	608339	transcript	XM_022425293.1	protein_coding	12	c.1687+30_1687+31insCGCGCCCTGGGTCAAAGGCAGGCGCCAAACCGCTGCGCCACCCAGGGATCCC
11	22471928	A	AGGGATCCCTGGGTGGCGCAGCGGTTTGGCGCCTGCCTTTGACCCAGGGCGCG	PASS	intron_variant	MODIFIER	CDKL3	608339	transcript	XM_022425294.1	protein_coding	12	c.1687+30_1687+31insCGCGCCCTGGGTCAAAGGCAGGCGCCAAACCGCTGCGCCACCCAGGGATCCC
11	22471928	A	AGGGATCCCTGGGTGGCGCAGCGGTTTGGCGCCTGCCTTTGACCCAGGGCGCG	PASS	intron_variant	MODIFIER	CDKL3	608339	transcript	XM_022425295.1	protein_coding	12	c.1687+30_1687+31insCGCGCCCTGGGTCAAAGGCAGGCGCCAAACCGCTGCGCCACCCAGGGATCCC
11	22471928	A	AGGGATCCCTGGGTGGCGCAGCGGTTTGGCGCCTGCCTTTGACCCAGGGCGCG	PASS	intron_variant	MODIFIER	CDKL3	608339	transcript	XM_022425296.1	protein_coding	12	c.1687+30_1687+31insCGCGCCCTGGGTCAAAGGCAGGCGCCAAACCGCTGCGCCACCCAGGGATCCC
11	22471928	A	AGGGATCCCTGGGTGGCGCAGCGGTTTGGCGCCTGCCTTTGACCCAGGGCGCG	PASS	intron_variant	MODIFIER	CDKL3	608339	transcript	XM_022425308.1	protein_coding	10	c.1429+30_1429+31insCGCGCCCTGGGTCAAAGGCAGGCGCCAAACCGCTGCGCCACCCAGGGATCCC
11	22471928	A	AGGGATCCCTGGGTGGCGCAGCGGTTTGGCGCCTGCCTTTGACCCAGGGCGCG	PASS	intron_variant	MODIFIER	CDKL3	608339	transcript	XM_022425309.1	protein_coding	8	c.1057+30_1057+31insCGCGCCCTGGGTCAAAGGCAGGCGCCAAACCGCTGCGCCACCCAGGGATCCC
11	22471928	A	AGGGATCCCTGGGTGGCGCAGCGGTTTGGCGCCTGCCTTTGACCCAGGGCGCG	PASS	intron_variant	MODIFIER	CDKL3	608339	transcript	XM_005626532.3	protein_coding	11	c.1624+30_1624+31insCGCGCCCTGGGTCAAAGGCAGGCGCCAAACCGCTGCGCCACCCAGGGATCCC
11	22471928	A	AGGGATCCCTGGGTGGCGCAGCGGTTTGGCGCCTGCCTTTGACCCAGGGCGCG	PASS	intron_variant	MODIFIER	CDKL3	608339	transcript	XM_022425301.1	protein_coding	12	c.1687+30_1687+31insCGCGCCCTGGGTCAAAGGCAGGCGCCAAACCGCTGCGCCACCCAGGGATCCC
11	22471928	A	AGGGATCCCTGGGTGGCGCAGCGGTTTGGCGCCTGCCTTTGACCCAGGGCGCG	PASS	intron_variant	MODIFIER	CDKL3	608339	transcript	XM_022425307.1	protein_coding	11	c.1624+30_1624+31insCGCGCCCTGGGTCAAAGGCAGGCGCCAAACCGCTGCGCCACCCAGGGATCCC
11	22471928	A	AGGGATCCCTGGGTGGCGCAGCGGTTTGGCGCCTGCCTTTGACCCAGGGCGCG	PASS	intron_variant	MODIFIER	CDKL3	608339	transcript	XM_022425303.1	protein_coding	12	c.1687+30_1687+31insCGCGCCCTGGGTCAAAGGCAGGCGCCAAACCGCTGCGCCACCCAGGGATCCC
11	22471928	A	AGGGATCCCTGGGTGGCGCAGCGGTTTGGCGCCTGCCTTTGACCCAGGGCGCG	PASS	intron_variant	MODIFIER	CDKL3	608339	transcript	XR_002631354.1	pseudogene	11	n.1793+30_1793+31insCGCGCCCTGGGTCAAAGGCAGGCGCCAAACCGCTGCGCCACCCAGGGATCCC
11	23158605	A	T	PASS	intergenic_region	MODIFIER	PITX1-LOC481514	481513-481514	intergenic_region	481513-481514		-1	n.23158605A>T
11	23238880	G	T	PASS	intergenic_region	MODIFIER	PITX1-LOC481514	481513-481514	intergenic_region	481513-481514		-1	n.23238880G>T
11	23239098	A	AT	PASS	intergenic_region	MODIFIER	PITX1-LOC481514	481513-481514	intergenic_region	481513-481514		-1	n.23239098_23239099insT
11	23932117	C	T	GATKstd	missense_variant	MODERATE	TGFBI	481519	transcript	XM_014117731.2	protein_coding	1	c.80C>T	p.Ala27Val
11	23949399	C	T	GATKstd	intron_variant	MODIFIER	TGFBI	481519	transcript	XM_014117731.2	protein_coding	4	c.519-4489C>T
11	24327789	TTGA	T	PASS	non_coding_transcript_exon_variant	MODIFIER	LOC102153297	102153297	transcript	XR_293547.3	pseudogene	5	n.1408_1410delTCA
11	24910199	C	T	GATKstd	intron_variant	MODIFIER	SPOCK1	474688	transcript	XM_022425052.1	protein_coding	2	c.68-18606G>A
11	25588727	C	T	GATKstd	intron_variant	MODIFIER	LOC106559473	106559473	transcript	XR_002631389.1	pseudogene	1	n.220+5298G>A
11	25588727	C	T	GATKstd	intron_variant	MODIFIER	MYOT	100855693	transcript	XM_005626582.3	protein_coding	6	c.820-376C>T
11	25588727	C	T	GATKstd	intron_variant	MODIFIER	LOC106559473	106559473	transcript	XR_001317275.2	pseudogene	1	n.220+5298G>A
11	25588727	C	T	GATKstd	intron_variant	MODIFIER	LOC106559473	106559473	transcript	XR_001317276.2	pseudogene	1	n.220+5298G>A
11	25588727	C	T	GATKstd	intron_variant	MODIFIER	MYOT	100855693	transcript	XM_003639375.4	protein_coding	6	c.817-376C>T
11	25672216	T	G	GATKstd	intron_variant	MODIFIER	FAM13B	100855720	transcript	XM_005626586.3	protein_coding	8	c.947+4728A>C
11	25672216	T	G	GATKstd	intron_variant	MODIFIER	FAM13B	100855720	transcript	XM_005626591.3	protein_coding	8	c.947+4728A>C
11	25672216	T	G	GATKstd	intron_variant	MODIFIER	FAM13B	100855720	transcript	XM_005626588.3	protein_coding	8	c.947+4728A>C
11	25672216	T	G	GATKstd	intron_variant	MODIFIER	FAM13B	100855720	transcript	XM_005626587.3	protein_coding	8	c.947+4728A>C
11	25672216	T	G	GATKstd	intron_variant	MODIFIER	FAM13B	100855720	transcript	XM_005626590.3	protein_coding	8	c.947+4728A>C
11	25672216	T	G	GATKstd	intron_variant	MODIFIER	FAM13B	100855720	transcript	XM_003639377.4	protein_coding	7	c.851+4728A>C
11	25672216	T	G	GATKstd	intron_variant	MODIFIER	FAM13B	100855720	transcript	XM_005626592.3	protein_coding	8	c.947+4728A>C
11	25672216	T	G	GATKstd	intron_variant	MODIFIER	FAM13B	100855720	transcript	XM_005626593.3	protein_coding	7	c.851+4728A>C
11	25672216	T	G	GATKstd	intron_variant	MODIFIER	FAM13B	100855720	transcript	XM_005626595.3	protein_coding	8	c.947+4728A>C
11	25672216	T	G	GATKstd	intron_variant	MODIFIER	FAM13B	100855720	transcript	XM_014117736.2	protein_coding	8	c.947+4728A>C
11	25672216	T	G	GATKstd	intron_variant	MODIFIER	FAM13B	100855720	transcript	XM_022425336.1	protein_coding	8	c.947+4728A>C
11	25672216	T	G	GATKstd	intron_variant	MODIFIER	FAM13B	100855720	transcript	XM_022425337.1	protein_coding	6	c.347+4728A>C
11	25886981	TAG	T	PASS	intron_variant	MODIFIER	GFRA3	481527	transcript	XM_022425355.1	protein_coding	3	c.470-545_470-544delCT
11	25886981	TAG	T	PASS	intron_variant	MODIFIER	GFRA3	481527	transcript	XM_005626603.3	protein_coding	3	c.470-545_470-544delCT
11	26040343	C	T	GATKstd	intergenic_region	MODIFIER	REEP2-EGR1	100683708-481528	intergenic_region	100683708-481528		-1	n.26040343C>T
11	26922732	CCTAA	C	PASS	downstream_gene_variant	MODIFIER	KIAA2026	610633	transcript	XM_022425368.1	protein_coding	-1	c.*4702_*4705delTTAG
11	26922732	CCTAA	C	PASS	intergenic_region	MODIFIER	MLANA-KIAA2026	403495-610633	intergenic_region	403495-610633		-1	n.26922733_26922736delCTAA
11	27244866	A	AG	PASS	intron_variant	MODIFIER	IL33	403810	transcript	NM_001003180.1	protein_coding	2	c.85+1500_85+1501insG
11	27244866	A	AG	PASS	intron_variant	MODIFIER	IL33	403810	transcript	XM_005626370.3	protein_coding	2	c.85+1500_85+1501insG
11	27344491	A	G	GATKstd	intergenic_region	MODIFIER	IL33-TPD52L3	403810-481533	intergenic_region	403810-481533		-1	n.27344491A>G
11	27365203	G	A	GATKstd	upstream_gene_variant	MODIFIER	LOC100683997	100683997	transcript	100683997	pseudogene	-1	n.-1606G>A
11	27365203	G	A	GATKstd	intergenic_region	MODIFIER	TPD52L3-LOC100683997	481533-100683997	intergenic_region	481533-100683997		-1	n.27365203G>A
11	27458698	G	A	GATKstd	intron_variant	MODIFIER	UHRF2	474702	transcript	XM_859327.5	protein_coding	9	c.1500+2419G>A
11	27458698	G	A	GATKstd	intron_variant	MODIFIER	UHRF2	474702	transcript	XM_022425369.1	protein_coding	9	c.1500+2419G>A
11	27458698	G	A	GATKstd	intron_variant	MODIFIER	UHRF2	474702	transcript	XM_005626614.3	protein_coding	8	c.1266+2419G>A
11	27613611	A	G	GATKstd	intergenic_region	MODIFIER	GLDC-LOC610717	481534-610717	intergenic_region	481534-610717		-1	n.27613611A>G
11	27676960	T	TC	PASS	intron_variant	MODIFIER	KDM4C	474704	transcript	XM_022425370.1	protein_coding	1	c.-107+13207_-107+13208insC
11	27954817	C	G	GATKstd	downstream_gene_variant	MODIFIER	KDM4C	474704	transcript	XM_022425373.1	protein_coding	-1	c.*1445C>G
11	27954817	C	G	GATKstd	intron_variant	MODIFIER	KDM4C	474704	transcript	XM_005626615.3	protein_coding	15	c.2174-958C>G
11	27954817	C	G	GATKstd	intron_variant	MODIFIER	KDM4C	474704	transcript	XM_022425370.1	protein_coding	15	c.2174-958C>G
11	27954817	C	G	GATKstd	intron_variant	MODIFIER	KDM4C	474704	transcript	XM_022425372.1	protein_coding	15	c.2174-958C>G
11	27954817	C	G	GATKstd	intron_variant	MODIFIER	KDM4C	474704	transcript	XR_002631401.1	pseudogene	15	n.2856-958C>G
11	27954817	C	G	GATKstd	intron_variant	MODIFIER	KDM4C	474704	transcript	XM_005626618.3	protein_coding	15	c.2174-958C>G
11	27954817	C	G	GATKstd	intron_variant	MODIFIER	KDM4C	474704	transcript	XM_005626617.3	protein_coding	14	c.2174-958C>G
11	27954817	C	G	GATKstd	intron_variant	MODIFIER	KDM4C	474704	transcript	XM_005626616.3	protein_coding	16	c.2174-958C>G
11	27954817	C	G	GATKstd	intron_variant	MODIFIER	KDM4C	474704	transcript	XM_014117748.2	protein_coding	14	c.2174-958C>G
11	28519080	A	C	GATKstd	intergenic_region	MODIFIER	KDM4C-LOC102152219	474704-102152219	intergenic_region	474704-102152219		-1	n.28519080A>C
11	28841659	C	T	GATKstd	intergenic_region	MODIFIER	DMAC1-LOC100685504	474705-100685504	intergenic_region	474705-100685504		-1	n.28841659C>T
11	28873350	T	G	GATKstd	intergenic_region	MODIFIER	DMAC1-LOC100685504	474705-100685504	intergenic_region	474705-100685504		-1	n.28873350T>G
11	28976622	A	T	GATKstd	intergenic_region	MODIFIER	LOC100685504-LOC111097933	100685504-111097933	intergenic_region	100685504-111097933		-1	n.28976622A>T
11	29172732	TA	T	PASS	intron_variant	MODIFIER	PTPRD	481538	transcript	XM_022425377.1	protein_coding	37	c.4273+7567delT
11	29172732	TA	T	PASS	intron_variant	MODIFIER	PTPRD	481538	transcript	XM_014117756.2	protein_coding	29	c.2959+7567delT
11	29172732	TA	T	PASS	intron_variant	MODIFIER	PTPRD	481538	transcript	XM_014117757.2	protein_coding	28	c.2947+7567delT
11	29172732	TA	T	PASS	intron_variant	MODIFIER	PTPRD	481538	transcript	XM_022425406.1	protein_coding	30	c.3007+7567delT
11	29172732	TA	T	PASS	intron_variant	MODIFIER	PTPRD	481538	transcript	XM_022425407.1	protein_coding	31	c.2992+7567delT
11	29172732	TA	T	PASS	intron_variant	MODIFIER	PTPRD	481538	transcript	XM_022425408.1	protein_coding	31	c.2989+7567delT
11	29172732	TA	T	PASS	intron_variant	MODIFIER	PTPRD	481538	transcript	XM_022425409.1	protein_coding	29	c.2989+7567delT
11	29172732	TA	T	PASS	intron_variant	MODIFIER	PTPRD	481538	transcript	XM_022425410.1	protein_coding	30	c.2980+7567delT
11	29172732	TA	T	PASS	intron_variant	MODIFIER	PTPRD	481538	transcript	XM_022425411.1	protein_coding	30	c.2980+7567delT
11	29172732	TA	T	PASS	intron_variant	MODIFIER	PTPRD	481538	transcript	XM_022425412.1	protein_coding	30	c.2977+7567delT
11	29172732	TA	T	PASS	intron_variant	MODIFIER	PTPRD	481538	transcript	XM_022425413.1	protein_coding	29	c.2962+7567delT
11	29172732	TA	T	PASS	intron_variant	MODIFIER	PTPRD	481538	transcript	XM_022425398.1	protein_coding	35	c.4210+7567delT
11	29172732	TA	T	PASS	intron_variant	MODIFIER	PTPRD	481538	transcript	XM_022425400.1	protein_coding	31	c.4144+7567delT
11	29172732	TA	T	PASS	intron_variant	MODIFIER	PTPRD	481538	transcript	XM_022425405.1	protein_coding	32	c.3898+7567delT
11	29172732	TA	T	PASS	intron_variant	MODIFIER	PTPRD	481538	transcript	XM_022425414.1	protein_coding	30	c.3841+7567delT
11	29172732	TA	T	PASS	intron_variant	MODIFIER	PTPRD	481538	transcript	XM_005626620.3	protein_coding	37	c.4270+7567delT
11	29172732	TA	T	PASS	intron_variant	MODIFIER	PTPRD	481538	transcript	XM_014117752.2	protein_coding	32	c.4153+7567delT
11	29172732	TA	T	PASS	intron_variant	MODIFIER	PTPRD	481538	transcript	XM_014117753.2	protein_coding	37	c.4261+7567delT
11	29172732	TA	T	PASS	intron_variant	MODIFIER	PTPRD	481538	transcript	XM_022425378.1	protein_coding	36	c.4273+7567delT
11	29172732	TA	T	PASS	intron_variant	MODIFIER	PTPRD	481538	transcript	XM_022425379.1	protein_coding	37	c.4270+7567delT
11	29172732	TA	T	PASS	intron_variant	MODIFIER	PTPRD	481538	transcript	XM_022425380.1	protein_coding	37	c.4270+7567delT
11	29172732	TA	T	PASS	intron_variant	MODIFIER	PTPRD	481538	transcript	XM_022425383.1	protein_coding	36	c.4264+7567delT
11	29172732	TA	T	PASS	intron_variant	MODIFIER	PTPRD	481538	transcript	XM_022425384.1	protein_coding	36	c.4261+7567delT
11	29172732	TA	T	PASS	intron_variant	MODIFIER	PTPRD	481538	transcript	XM_022425385.1	protein_coding	36	c.4258+7567delT
11	29172732	TA	T	PASS	intron_variant	MODIFIER	PTPRD	481538	transcript	XM_022425386.1	protein_coding	36	c.4255+7567delT
11	29172732	TA	T	PASS	intron_variant	MODIFIER	PTPRD	481538	transcript	XM_022425387.1	protein_coding	36	c.4252+7567delT
11	29172732	TA	T	PASS	intron_variant	MODIFIER	PTPRD	481538	transcript	XM_022425388.1	protein_coding	35	c.4246+7567delT
11	29172732	TA	T	PASS	intron_variant	MODIFIER	PTPRD	481538	transcript	XM_022425389.1	protein_coding	36	c.4246+7567delT
11	29172732	TA	T	PASS	intron_variant	MODIFIER	PTPRD	481538	transcript	XM_022425390.1	protein_coding	35	c.4243+7567delT
11	29172732	TA	T	PASS	intron_variant	MODIFIER	PTPRD	481538	transcript	XM_022425391.1	protein_coding	34	c.4234+7567delT
11	29172732	TA	T	PASS	intron_variant	MODIFIER	PTPRD	481538	transcript	XM_022425392.1	protein_coding	34	c.4231+7567delT
11	29172732	TA	T	PASS	intron_variant	MODIFIER	PTPRD	481538	transcript	XM_022425393.1	protein_coding	36	c.4231+7567delT
11	29172732	TA	T	PASS	intron_variant	MODIFIER	PTPRD	481538	transcript	XM_022425394.1	protein_coding	36	c.4228+7567delT
11	29172732	TA	T	PASS	intron_variant	MODIFIER	PTPRD	481538	transcript	XM_022425395.1	protein_coding	36	c.4225+7567delT
11	29172732	TA	T	PASS	intron_variant	MODIFIER	PTPRD	481538	transcript	XM_022425396.1	protein_coding	35	c.4216+7567delT
11	29172732	TA	T	PASS	intron_variant	MODIFIER	PTPRD	481538	transcript	XM_022425397.1	protein_coding	35	c.4213+7567delT
11	29172732	TA	T	PASS	intron_variant	MODIFIER	PTPRD	481538	transcript	XM_022425399.1	protein_coding	33	c.4201+7567delT
11	29172732	TA	T	PASS	intron_variant	MODIFIER	PTPRD	481538	transcript	XM_022425401.1	protein_coding	36	c.3967+7567delT
11	29172732	TA	T	PASS	intron_variant	MODIFIER	PTPRD	481538	transcript	XM_022425402.1	protein_coding	35	c.3955+7567delT
11	29172732	TA	T	PASS	intron_variant	MODIFIER	PTPRD	481538	transcript	XM_022425403.1	protein_coding	34	c.3943+7567delT
11	29172732	TA	T	PASS	intron_variant	MODIFIER	PTPRD	481538	transcript	XM_022425404.1	protein_coding	33	c.3925+7567delT
11	29172732	TA	T	PASS	intron_variant	MODIFIER	PTPRD	481538	transcript	XM_022425381.1	protein_coding	37	c.4270+7567delT
11	29172732	TA	T	PASS	intron_variant	MODIFIER	PTPRD	481538	transcript	XM_022425382.1	protein_coding	37	c.4267+7567delT
11	29181827	G	A	GATKstd	intron_variant	MODIFIER	PTPRD	481538	transcript	XM_022425377.1	protein_coding	36	c.4150-1404C>T
11	29181827	G	A	GATKstd	intron_variant	MODIFIER	PTPRD	481538	transcript	XM_014117756.2	protein_coding	28	c.2836-1404C>T
11	29181827	G	A	GATKstd	intron_variant	MODIFIER	PTPRD	481538	transcript	XM_014117757.2	protein_coding	27	c.2824-1404C>T
11	29181827	G	A	GATKstd	intron_variant	MODIFIER	PTPRD	481538	transcript	XM_022425406.1	protein_coding	29	c.2884-1404C>T
11	29181827	G	A	GATKstd	intron_variant	MODIFIER	PTPRD	481538	transcript	XM_022425407.1	protein_coding	30	c.2869-1404C>T
11	29181827	G	A	GATKstd	intron_variant	MODIFIER	PTPRD	481538	transcript	XM_022425408.1	protein_coding	30	c.2866-1404C>T
11	29181827	G	A	GATKstd	intron_variant	MODIFIER	PTPRD	481538	transcript	XM_022425409.1	protein_coding	28	c.2866-1404C>T
11	29181827	G	A	GATKstd	intron_variant	MODIFIER	PTPRD	481538	transcript	XM_022425410.1	protein_coding	29	c.2857-1404C>T
11	29181827	G	A	GATKstd	intron_variant	MODIFIER	PTPRD	481538	transcript	XM_022425411.1	protein_coding	29	c.2857-1404C>T
11	29181827	G	A	GATKstd	intron_variant	MODIFIER	PTPRD	481538	transcript	XM_022425412.1	protein_coding	29	c.2854-1404C>T
11	29181827	G	A	GATKstd	intron_variant	MODIFIER	PTPRD	481538	transcript	XM_022425413.1	protein_coding	28	c.2839-1404C>T
11	29181827	G	A	GATKstd	intron_variant	MODIFIER	PTPRD	481538	transcript	XM_022425398.1	protein_coding	34	c.4087-1404C>T
11	29181827	G	A	GATKstd	intron_variant	MODIFIER	PTPRD	481538	transcript	XM_022425400.1	protein_coding	30	c.4021-1404C>T
11	29181827	G	A	GATKstd	intron_variant	MODIFIER	PTPRD	481538	transcript	XM_022425405.1	protein_coding	31	c.3775-1404C>T
11	29181827	G	A	GATKstd	intron_variant	MODIFIER	PTPRD	481538	transcript	XM_022425414.1	protein_coding	29	c.3718-1404C>T
11	29181827	G	A	GATKstd	intron_variant	MODIFIER	PTPRD	481538	transcript	XM_005626620.3	protein_coding	36	c.4147-1404C>T
11	29181827	G	A	GATKstd	intron_variant	MODIFIER	PTPRD	481538	transcript	XM_014117752.2	protein_coding	31	c.4030-1404C>T
11	29181827	G	A	GATKstd	intron_variant	MODIFIER	PTPRD	481538	transcript	XM_014117753.2	protein_coding	36	c.4138-1404C>T
11	29181827	G	A	GATKstd	intron_variant	MODIFIER	PTPRD	481538	transcript	XM_022425378.1	protein_coding	35	c.4150-1404C>T
11	29181827	G	A	GATKstd	intron_variant	MODIFIER	PTPRD	481538	transcript	XM_022425379.1	protein_coding	36	c.4147-1404C>T
11	29181827	G	A	GATKstd	intron_variant	MODIFIER	PTPRD	481538	transcript	XM_022425380.1	protein_coding	36	c.4147-1404C>T
11	29181827	G	A	GATKstd	intron_variant	MODIFIER	PTPRD	481538	transcript	XM_022425383.1	protein_coding	35	c.4141-1404C>T
11	29181827	G	A	GATKstd	intron_variant	MODIFIER	PTPRD	481538	transcript	XM_022425384.1	protein_coding	35	c.4138-1404C>T
11	29181827	G	A	GATKstd	intron_variant	MODIFIER	PTPRD	481538	transcript	XM_022425385.1	protein_coding	35	c.4135-1404C>T
11	29181827	G	A	GATKstd	intron_variant	MODIFIER	PTPRD	481538	transcript	XM_022425386.1	protein_coding	35	c.4132-1404C>T
11	29181827	G	A	GATKstd	intron_variant	MODIFIER	PTPRD	481538	transcript	XM_022425387.1	protein_coding	35	c.4129-1404C>T
11	29181827	G	A	GATKstd	intron_variant	MODIFIER	PTPRD	481538	transcript	XM_022425388.1	protein_coding	34	c.4123-1404C>T
11	29181827	G	A	GATKstd	intron_variant	MODIFIER	PTPRD	481538	transcript	XM_022425389.1	protein_coding	35	c.4123-1404C>T
11	29181827	G	A	GATKstd	intron_variant	MODIFIER	PTPRD	481538	transcript	XM_022425390.1	protein_coding	34	c.4120-1404C>T
11	29181827	G	A	GATKstd	intron_variant	MODIFIER	PTPRD	481538	transcript	XM_022425391.1	protein_coding	33	c.4111-1404C>T
11	29181827	G	A	GATKstd	intron_variant	MODIFIER	PTPRD	481538	transcript	XM_022425392.1	protein_coding	33	c.4108-1404C>T
11	29181827	G	A	GATKstd	intron_variant	MODIFIER	PTPRD	481538	transcript	XM_022425393.1	protein_coding	35	c.4108-1404C>T
11	29181827	G	A	GATKstd	intron_variant	MODIFIER	PTPRD	481538	transcript	XM_022425394.1	protein_coding	35	c.4105-1404C>T
11	29181827	G	A	GATKstd	intron_variant	MODIFIER	PTPRD	481538	transcript	XM_022425395.1	protein_coding	35	c.4102-1404C>T
11	29181827	G	A	GATKstd	intron_variant	MODIFIER	PTPRD	481538	transcript	XM_022425396.1	protein_coding	34	c.4093-1404C>T
11	29181827	G	A	GATKstd	intron_variant	MODIFIER	PTPRD	481538	transcript	XM_022425397.1	protein_coding	34	c.4090-1404C>T
11	29181827	G	A	GATKstd	intron_variant	MODIFIER	PTPRD	481538	transcript	XM_022425399.1	protein_coding	32	c.4078-1404C>T
11	29181827	G	A	GATKstd	intron_variant	MODIFIER	PTPRD	481538	transcript	XM_022425401.1	protein_coding	35	c.3844-1404C>T
11	29181827	G	A	GATKstd	intron_variant	MODIFIER	PTPRD	481538	transcript	XM_022425402.1	protein_coding	34	c.3832-1404C>T
11	29181827	G	A	GATKstd	intron_variant	MODIFIER	PTPRD	481538	transcript	XM_022425403.1	protein_coding	33	c.3820-1404C>T
11	29181827	G	A	GATKstd	intron_variant	MODIFIER	PTPRD	481538	transcript	XM_022425404.1	protein_coding	32	c.3802-1404C>T
11	29181827	G	A	GATKstd	intron_variant	MODIFIER	PTPRD	481538	transcript	XM_022425381.1	protein_coding	36	c.4147-1404C>T
11	29181827	G	A	GATKstd	intron_variant	MODIFIER	PTPRD	481538	transcript	XM_022425382.1	protein_coding	36	c.4144-1404C>T
11	29237356	G	C	GATKstd	intron_variant	MODIFIER	PTPRD	481538	transcript	XM_022425377.1	protein_coding	31	c.3721-916C>G
11	29237356	G	C	GATKstd	intron_variant	MODIFIER	PTPRD	481538	transcript	XM_014117756.2	protein_coding	24	c.2455-919C>G
11	29237356	G	C	GATKstd	intron_variant	MODIFIER	PTPRD	481538	transcript	XM_014117757.2	protein_coding	23	c.2443-919C>G
11	29237356	G	C	GATKstd	intron_variant	MODIFIER	PTPRD	481538	transcript	XM_022425406.1	protein_coding	24	c.2455-916C>G
11	29237356	G	C	GATKstd	intron_variant	MODIFIER	PTPRD	481538	transcript	XM_022425407.1	protein_coding	26	c.2482-916C>G
11	29237356	G	C	GATKstd	intron_variant	MODIFIER	PTPRD	481538	transcript	XM_022425408.1	protein_coding	26	c.2482-916C>G
11	29237356	G	C	GATKstd	intron_variant	MODIFIER	PTPRD	481538	transcript	XM_022425409.1	protein_coding	24	c.2452-916C>G
11	29237356	G	C	GATKstd	intron_variant	MODIFIER	PTPRD	481538	transcript	XM_022425410.1	protein_coding	26	c.2485-916C>G
11	29237356	G	C	GATKstd	intron_variant	MODIFIER	PTPRD	481538	transcript	XM_022425411.1	protein_coding	25	c.2473-916C>G
11	29237356	G	C	GATKstd	intron_variant	MODIFIER	PTPRD	481538	transcript	XM_022425412.1	protein_coding	26	c.2482-916C>G
11	29237356	G	C	GATKstd	intron_variant	MODIFIER	PTPRD	481538	transcript	XM_022425413.1	protein_coding	25	c.2467-916C>G
11	29237356	G	C	GATKstd	intron_variant	MODIFIER	PTPRD	481538	transcript	XM_022425398.1	protein_coding	31	c.3715-916C>G
11	29237356	G	C	GATKstd	intron_variant	MODIFIER	PTPRD	481538	transcript	XM_022425400.1	protein_coding	27	c.3649-916C>G
11	29237356	G	C	GATKstd	intron_variant	MODIFIER	PTPRD	481538	transcript	XM_022425405.1	protein_coding	26	c.3346-916C>G
11	29237356	G	C	GATKstd	intron_variant	MODIFIER	PTPRD	481538	transcript	XM_022425414.1	protein_coding	26	c.3346-916C>G
11	29237356	G	C	GATKstd	intron_variant	MODIFIER	PTPRD	481538	transcript	XM_005626620.3	protein_coding	31	c.3718-916C>G
11	29237356	G	C	GATKstd	intron_variant	MODIFIER	PTPRD	481538	transcript	XM_014117752.2	protein_coding	27	c.3649-919C>G
11	29237356	G	C	GATKstd	intron_variant	MODIFIER	PTPRD	481538	transcript	XM_014117753.2	protein_coding	31	c.3715-919C>G
11	29237356	G	C	GATKstd	intron_variant	MODIFIER	PTPRD	481538	transcript	XM_022425378.1	protein_coding	30	c.3721-916C>G
11	29237356	G	C	GATKstd	intron_variant	MODIFIER	PTPRD	481538	transcript	XM_022425379.1	protein_coding	31	c.3721-916C>G
11	29237356	G	C	GATKstd	intron_variant	MODIFIER	PTPRD	481538	transcript	XM_022425380.1	protein_coding	31	c.3718-916C>G
11	29237356	G	C	GATKstd	intron_variant	MODIFIER	PTPRD	481538	transcript	XM_022425383.1	protein_coding	30	c.3712-916C>G
11	29237356	G	C	GATKstd	intron_variant	MODIFIER	PTPRD	481538	transcript	XM_022425384.1	protein_coding	30	c.3709-916C>G
11	29237356	G	C	GATKstd	intron_variant	MODIFIER	PTPRD	481538	transcript	XM_022425385.1	protein_coding	31	c.3721-916C>G
11	29237356	G	C	GATKstd	intron_variant	MODIFIER	PTPRD	481538	transcript	XM_022425386.1	protein_coding	30	c.3703-916C>G
11	29237356	G	C	GATKstd	intron_variant	MODIFIER	PTPRD	481538	transcript	XM_022425387.1	protein_coding	30	c.3700-916C>G
11	29237356	G	C	GATKstd	intron_variant	MODIFIER	PTPRD	481538	transcript	XM_022425388.1	protein_coding	29	c.3694-916C>G
11	29237356	G	C	GATKstd	intron_variant	MODIFIER	PTPRD	481538	transcript	XM_022425389.1	protein_coding	30	c.3694-916C>G
11	29237356	G	C	GATKstd	intron_variant	MODIFIER	PTPRD	481538	transcript	XM_022425390.1	protein_coding	29	c.3691-916C>G
11	29237356	G	C	GATKstd	intron_variant	MODIFIER	PTPRD	481538	transcript	XM_022425391.1	protein_coding	28	c.3682-916C>G
11	29237356	G	C	GATKstd	intron_variant	MODIFIER	PTPRD	481538	transcript	XM_022425392.1	protein_coding	28	c.3679-916C>G
11	29237356	G	C	GATKstd	intron_variant	MODIFIER	PTPRD	481538	transcript	XM_022425393.1	protein_coding	31	c.3721-916C>G
11	29237356	G	C	GATKstd	intron_variant	MODIFIER	PTPRD	481538	transcript	XM_022425394.1	protein_coding	31	c.3721-916C>G
11	29237356	G	C	GATKstd	intron_variant	MODIFIER	PTPRD	481538	transcript	XM_022425395.1	protein_coding	31	c.3721-919C>G
11	29237356	G	C	GATKstd	intron_variant	MODIFIER	PTPRD	481538	transcript	XM_022425396.1	protein_coding	31	c.3721-916C>G
11	29237356	G	C	GATKstd	intron_variant	MODIFIER	PTPRD	481538	transcript	XM_022425397.1	protein_coding	31	c.3718-916C>G
11	29237356	G	C	GATKstd	intron_variant	MODIFIER	PTPRD	481538	transcript	XM_022425399.1	protein_coding	27	c.3649-916C>G
11	29237356	G	C	GATKstd	intron_variant	MODIFIER	PTPRD	481538	transcript	XM_022425401.1	protein_coding	30	c.3415-916C>G
11	29237356	G	C	GATKstd	intron_variant	MODIFIER	PTPRD	481538	transcript	XM_022425402.1	protein_coding	29	c.3403-916C>G
11	29237356	G	C	GATKstd	intron_variant	MODIFIER	PTPRD	481538	transcript	XM_022425403.1	protein_coding	28	c.3391-916C>G
11	29237356	G	C	GATKstd	intron_variant	MODIFIER	PTPRD	481538	transcript	XM_022425404.1	protein_coding	27	c.3373-916C>G
11	29237356	G	C	GATKstd	intron_variant	MODIFIER	PTPRD	481538	transcript	XM_022425381.1	protein_coding	31	c.3721-919C>G
11	29237356	G	C	GATKstd	intron_variant	MODIFIER	PTPRD	481538	transcript	XM_022425382.1	protein_coding	31	c.3721-919C>G
11	29295380	G	A	GATKstd	intron_variant	MODIFIER	PTPRD	481538	transcript	XM_022425377.1	protein_coding	15	c.553+173C>T
11	29295380	G	A	GATKstd	intron_variant	MODIFIER	PTPRD	481538	transcript	XM_014117756.2	protein_coding	14	c.541+1424C>T
11	29295380	G	A	GATKstd	intron_variant	MODIFIER	PTPRD	481538	transcript	XM_014117757.2	protein_coding	14	c.541+1424C>T
11	29295380	G	A	GATKstd	intron_variant	MODIFIER	PTPRD	481538	transcript	XM_022425406.1	protein_coding	14	c.541+1424C>T
11	29295380	G	A	GATKstd	intron_variant	MODIFIER	PTPRD	481538	transcript	XM_022425407.1	protein_coding	15	c.550+173C>T
11	29295380	G	A	GATKstd	intron_variant	MODIFIER	PTPRD	481538	transcript	XM_022425408.1	protein_coding	15	c.550+173C>T
11	29295380	G	A	GATKstd	intron_variant	MODIFIER	PTPRD	481538	transcript	XM_022425409.1	protein_coding	15	c.550+173C>T
11	29295380	G	A	GATKstd	intron_variant	MODIFIER	PTPRD	481538	transcript	XM_022425410.1	protein_coding	15	c.553+173C>T
11	29295380	G	A	GATKstd	intron_variant	MODIFIER	PTPRD	481538	transcript	XM_022425411.1	protein_coding	14	c.542-551C>T
11	29295380	G	A	GATKstd	intron_variant	MODIFIER	PTPRD	481538	transcript	XM_022425412.1	protein_coding	15	c.550+173C>T
11	29295380	G	A	GATKstd	intron_variant	MODIFIER	PTPRD	481538	transcript	XM_022425413.1	protein_coding	15	c.550+173C>T
11	29295380	G	A	GATKstd	intron_variant	MODIFIER	PTPRD	481538	transcript	XM_022425398.1	protein_coding	15	c.550+173C>T
11	29295380	G	A	GATKstd	intron_variant	MODIFIER	PTPRD	481538	transcript	XM_022425400.1	protein_coding	14	c.541+1424C>T
11	29295380	G	A	GATKstd	intron_variant	MODIFIER	PTPRD	481538	transcript	XM_022425405.1	protein_coding	14	c.541+1424C>T
11	29295380	G	A	GATKstd	intron_variant	MODIFIER	PTPRD	481538	transcript	XM_022425414.1	protein_coding	14	c.541+1424C>T
11	29295380	G	A	GATKstd	intron_variant	MODIFIER	PTPRD	481538	transcript	XM_005626620.3	protein_coding	15	c.550+173C>T
11	29295380	G	A	GATKstd	intron_variant	MODIFIER	PTPRD	481538	transcript	XM_014117752.2	protein_coding	14	c.541+1424C>T
11	29295380	G	A	GATKstd	intron_variant	MODIFIER	PTPRD	481538	transcript	XM_014117753.2	protein_coding	15	c.550+173C>T
11	29295380	G	A	GATKstd	intron_variant	MODIFIER	PTPRD	481538	transcript	XM_022425378.1	protein_coding	14	c.553+173C>T
11	29295380	G	A	GATKstd	intron_variant	MODIFIER	PTPRD	481538	transcript	XM_022425379.1	protein_coding	15	c.553+173C>T
11	29295380	G	A	GATKstd	intron_variant	MODIFIER	PTPRD	481538	transcript	XM_022425380.1	protein_coding	15	c.553+173C>T
11	29295380	G	A	GATKstd	intron_variant	MODIFIER	PTPRD	481538	transcript	XM_022425383.1	protein_coding	14	c.545-551C>T
11	29295380	G	A	GATKstd	intron_variant	MODIFIER	PTPRD	481538	transcript	XM_022425384.1	protein_coding	15	c.553+173C>T
11	29295380	G	A	GATKstd	intron_variant	MODIFIER	PTPRD	481538	transcript	XM_022425385.1	protein_coding	15	c.553+173C>T
11	29295380	G	A	GATKstd	intron_variant	MODIFIER	PTPRD	481538	transcript	XM_022425386.1	protein_coding	15	c.553+173C>T
11	29295380	G	A	GATKstd	intron_variant	MODIFIER	PTPRD	481538	transcript	XM_022425387.1	protein_coding	15	c.550+173C>T
11	29295380	G	A	GATKstd	intron_variant	MODIFIER	PTPRD	481538	transcript	XM_022425388.1	protein_coding	14	c.544+1424C>T
11	29295380	G	A	GATKstd	intron_variant	MODIFIER	PTPRD	481538	transcript	XM_022425389.1	protein_coding	15	c.553+173C>T
11	29295380	G	A	GATKstd	intron_variant	MODIFIER	PTPRD	481538	transcript	XM_022425390.1	protein_coding	15	c.553+173C>T
11	29295380	G	A	GATKstd	intron_variant	MODIFIER	PTPRD	481538	transcript	XM_022425391.1	protein_coding	14	c.544+1424C>T
11	29295380	G	A	GATKstd	intron_variant	MODIFIER	PTPRD	481538	transcript	XM_022425392.1	protein_coding	14	c.541+1424C>T
11	29295380	G	A	GATKstd	intron_variant	MODIFIER	PTPRD	481538	transcript	XM_022425393.1	protein_coding	15	c.553+173C>T
11	29295380	G	A	GATKstd	intron_variant	MODIFIER	PTPRD	481538	transcript	XM_022425394.1	protein_coding	15	c.553+173C>T
11	29295380	G	A	GATKstd	intron_variant	MODIFIER	PTPRD	481538	transcript	XM_022425395.1	protein_coding	15	c.553+173C>T
11	29295380	G	A	GATKstd	intron_variant	MODIFIER	PTPRD	481538	transcript	XM_022425396.1	protein_coding	15	c.553+173C>T
11	29295380	G	A	GATKstd	intron_variant	MODIFIER	PTPRD	481538	transcript	XM_022425397.1	protein_coding	15	c.553+173C>T
11	29295380	G	A	GATKstd	intron_variant	MODIFIER	PTPRD	481538	transcript	XM_022425399.1	protein_coding	14	c.541+1424C>T
11	29295380	G	A	GATKstd	intron_variant	MODIFIER	PTPRD	481538	transcript	XM_022425401.1	protein_coding	15	c.553+173C>T
11	29295380	G	A	GATKstd	intron_variant	MODIFIER	PTPRD	481538	transcript	XM_022425402.1	protein_coding	14	c.542-551C>T
11	29295380	G	A	GATKstd	intron_variant	MODIFIER	PTPRD	481538	transcript	XM_022425403.1	protein_coding	14	c.542-551C>T
11	29295380	G	A	GATKstd	intron_variant	MODIFIER	PTPRD	481538	transcript	XM_022425404.1	protein_coding	14	c.541+1424C>T
11	29295380	G	A	GATKstd	intron_variant	MODIFIER	PTPRD	481538	transcript	XM_022425381.1	protein_coding	15	c.553+173C>T
11	29295380	G	A	GATKstd	intron_variant	MODIFIER	PTPRD	481538	transcript	XM_022425382.1	protein_coding	15	c.553+173C>T
11	29566639	A	C	GATKstd	intron_variant	MODIFIER	PTPRD	481538	transcript	XM_022425377.1	protein_coding	10	c.-103-65039T>G
11	29566639	A	C	GATKstd	intron_variant	MODIFIER	PTPRD	481538	transcript	XM_014117756.2	protein_coding	10	c.-103-65039T>G
11	29566639	A	C	GATKstd	intron_variant	MODIFIER	PTPRD	481538	transcript	XM_014117757.2	protein_coding	10	c.-103-65039T>G
11	29566639	A	C	GATKstd	intron_variant	MODIFIER	PTPRD	481538	transcript	XM_022425406.1	protein_coding	10	c.-103-65039T>G
11	29566639	A	C	GATKstd	intron_variant	MODIFIER	PTPRD	481538	transcript	XM_022425407.1	protein_coding	10	c.-103-65039T>G
11	29566639	A	C	GATKstd	intron_variant	MODIFIER	PTPRD	481538	transcript	XM_022425408.1	protein_coding	10	c.-103-65039T>G
11	29566639	A	C	GATKstd	intron_variant	MODIFIER	PTPRD	481538	transcript	XM_022425409.1	protein_coding	10	c.-103-65039T>G
11	29566639	A	C	GATKstd	intron_variant	MODIFIER	PTPRD	481538	transcript	XM_022425410.1	protein_coding	10	c.-103-65039T>G
11	29566639	A	C	GATKstd	intron_variant	MODIFIER	PTPRD	481538	transcript	XM_022425411.1	protein_coding	10	c.-103-65039T>G
11	29566639	A	C	GATKstd	intron_variant	MODIFIER	PTPRD	481538	transcript	XM_022425412.1	protein_coding	10	c.-103-65039T>G
11	29566639	A	C	GATKstd	intron_variant	MODIFIER	PTPRD	481538	transcript	XM_022425413.1	protein_coding	10	c.-103-65039T>G
11	29566639	A	C	GATKstd	intron_variant	MODIFIER	PTPRD	481538	transcript	XM_022425398.1	protein_coding	10	c.-103-65039T>G
11	29566639	A	C	GATKstd	intron_variant	MODIFIER	PTPRD	481538	transcript	XM_022425400.1	protein_coding	10	c.-103-65039T>G
11	29566639	A	C	GATKstd	intron_variant	MODIFIER	PTPRD	481538	transcript	XM_022425405.1	protein_coding	10	c.-103-65039T>G
11	29566639	A	C	GATKstd	intron_variant	MODIFIER	PTPRD	481538	transcript	XM_022425414.1	protein_coding	10	c.-103-65039T>G
11	29566639	A	C	GATKstd	intron_variant	MODIFIER	PTPRD	481538	transcript	XM_005626620.3	protein_coding	10	c.-103-65039T>G
11	29566639	A	C	GATKstd	intron_variant	MODIFIER	PTPRD	481538	transcript	XM_014117752.2	protein_coding	10	c.-103-65039T>G
11	29566639	A	C	GATKstd	intron_variant	MODIFIER	PTPRD	481538	transcript	XM_014117753.2	protein_coding	10	c.-103-65039T>G
11	29566639	A	C	GATKstd	intron_variant	MODIFIER	PTPRD	481538	transcript	XM_022425378.1	protein_coding	9	c.-103-65039T>G
11	29566639	A	C	GATKstd	intron_variant	MODIFIER	PTPRD	481538	transcript	XM_022425379.1	protein_coding	10	c.-103-65039T>G
11	29566639	A	C	GATKstd	intron_variant	MODIFIER	PTPRD	481538	transcript	XM_022425380.1	protein_coding	10	c.-103-65039T>G
11	29566639	A	C	GATKstd	intron_variant	MODIFIER	PTPRD	481538	transcript	XM_022425383.1	protein_coding	10	c.-103-65039T>G
11	29566639	A	C	GATKstd	intron_variant	MODIFIER	PTPRD	481538	transcript	XM_022425384.1	protein_coding	10	c.-103-65039T>G
11	29566639	A	C	GATKstd	intron_variant	MODIFIER	PTPRD	481538	transcript	XM_022425385.1	protein_coding	10	c.-103-65039T>G
11	29566639	A	C	GATKstd	intron_variant	MODIFIER	PTPRD	481538	transcript	XM_022425386.1	protein_coding	10	c.-103-65039T>G
11	29566639	A	C	GATKstd	intron_variant	MODIFIER	PTPRD	481538	transcript	XM_022425387.1	protein_coding	10	c.-103-65039T>G
11	29566639	A	C	GATKstd	intron_variant	MODIFIER	PTPRD	481538	transcript	XM_022425388.1	protein_coding	10	c.-103-65039T>G
11	29566639	A	C	GATKstd	intron_variant	MODIFIER	PTPRD	481538	transcript	XM_022425389.1	protein_coding	10	c.-103-65039T>G
11	29566639	A	C	GATKstd	intron_variant	MODIFIER	PTPRD	481538	transcript	XM_022425390.1	protein_coding	10	c.-103-65039T>G
11	29566639	A	C	GATKstd	intron_variant	MODIFIER	PTPRD	481538	transcript	XM_022425391.1	protein_coding	10	c.-103-65039T>G
11	29566639	A	C	GATKstd	intron_variant	MODIFIER	PTPRD	481538	transcript	XM_022425392.1	protein_coding	10	c.-103-65039T>G
11	29566639	A	C	GATKstd	intron_variant	MODIFIER	PTPRD	481538	transcript	XM_022425393.1	protein_coding	10	c.-103-65039T>G
11	29566639	A	C	GATKstd	intron_variant	MODIFIER	PTPRD	481538	transcript	XM_022425394.1	protein_coding	10	c.-103-65039T>G
11	29566639	A	C	GATKstd	intron_variant	MODIFIER	PTPRD	481538	transcript	XM_022425395.1	protein_coding	10	c.-103-65039T>G
11	29566639	A	C	GATKstd	intron_variant	MODIFIER	PTPRD	481538	transcript	XM_022425396.1	protein_coding	10	c.-103-65039T>G
11	29566639	A	C	GATKstd	intron_variant	MODIFIER	PTPRD	481538	transcript	XM_022425397.1	protein_coding	10	c.-103-65039T>G
11	29566639	A	C	GATKstd	intron_variant	MODIFIER	PTPRD	481538	transcript	XM_022425399.1	protein_coding	10	c.-103-65039T>G
11	29566639	A	C	GATKstd	intron_variant	MODIFIER	PTPRD	481538	transcript	XM_022425401.1	protein_coding	10	c.-103-65039T>G
11	29566639	A	C	GATKstd	intron_variant	MODIFIER	PTPRD	481538	transcript	XM_022425402.1	protein_coding	10	c.-103-65039T>G
11	29566639	A	C	GATKstd	intron_variant	MODIFIER	PTPRD	481538	transcript	XM_022425403.1	protein_coding	10	c.-103-65039T>G
11	29566639	A	C	GATKstd	intron_variant	MODIFIER	PTPRD	481538	transcript	XM_022425404.1	protein_coding	10	c.-103-65039T>G
11	29566639	A	C	GATKstd	intron_variant	MODIFIER	PTPRD	481538	transcript	XM_022425381.1	protein_coding	10	c.-103-65039T>G
11	29566639	A	C	GATKstd	intron_variant	MODIFIER	PTPRD	481538	transcript	XM_022425382.1	protein_coding	10	c.-103-65039T>G
11	29579921	T	C	GATKstd	intron_variant	MODIFIER	PTPRD	481538	transcript	XM_022425377.1	protein_coding	10	c.-103-78321A>G
11	29579921	T	C	GATKstd	intron_variant	MODIFIER	PTPRD	481538	transcript	XM_014117756.2	protein_coding	10	c.-103-78321A>G
11	29579921	T	C	GATKstd	intron_variant	MODIFIER	PTPRD	481538	transcript	XM_014117757.2	protein_coding	10	c.-103-78321A>G
11	29579921	T	C	GATKstd	intron_variant	MODIFIER	PTPRD	481538	transcript	XM_022425406.1	protein_coding	10	c.-103-78321A>G
11	29579921	T	C	GATKstd	intron_variant	MODIFIER	PTPRD	481538	transcript	XM_022425407.1	protein_coding	10	c.-103-78321A>G
11	29579921	T	C	GATKstd	intron_variant	MODIFIER	PTPRD	481538	transcript	XM_022425408.1	protein_coding	10	c.-103-78321A>G
11	29579921	T	C	GATKstd	intron_variant	MODIFIER	PTPRD	481538	transcript	XM_022425409.1	protein_coding	10	c.-103-78321A>G
11	29579921	T	C	GATKstd	intron_variant	MODIFIER	PTPRD	481538	transcript	XM_022425410.1	protein_coding	10	c.-103-78321A>G
11	29579921	T	C	GATKstd	intron_variant	MODIFIER	PTPRD	481538	transcript	XM_022425411.1	protein_coding	10	c.-103-78321A>G
11	29579921	T	C	GATKstd	intron_variant	MODIFIER	PTPRD	481538	transcript	XM_022425412.1	protein_coding	10	c.-103-78321A>G
11	29579921	T	C	GATKstd	intron_variant	MODIFIER	PTPRD	481538	transcript	XM_022425413.1	protein_coding	10	c.-103-78321A>G
11	29579921	T	C	GATKstd	intron_variant	MODIFIER	PTPRD	481538	transcript	XM_022425398.1	protein_coding	10	c.-103-78321A>G
11	29579921	T	C	GATKstd	intron_variant	MODIFIER	PTPRD	481538	transcript	XM_022425400.1	protein_coding	10	c.-103-78321A>G
11	29579921	T	C	GATKstd	intron_variant	MODIFIER	PTPRD	481538	transcript	XM_022425405.1	protein_coding	10	c.-103-78321A>G
11	29579921	T	C	GATKstd	intron_variant	MODIFIER	PTPRD	481538	transcript	XM_022425414.1	protein_coding	10	c.-103-78321A>G
11	29579921	T	C	GATKstd	intron_variant	MODIFIER	PTPRD	481538	transcript	XM_005626620.3	protein_coding	10	c.-103-78321A>G
11	29579921	T	C	GATKstd	intron_variant	MODIFIER	PTPRD	481538	transcript	XM_014117752.2	protein_coding	10	c.-103-78321A>G
11	29579921	T	C	GATKstd	intron_variant	MODIFIER	PTPRD	481538	transcript	XM_014117753.2	protein_coding	10	c.-103-78321A>G
11	29579921	T	C	GATKstd	intron_variant	MODIFIER	PTPRD	481538	transcript	XM_022425378.1	protein_coding	9	c.-103-78321A>G
11	29579921	T	C	GATKstd	intron_variant	MODIFIER	PTPRD	481538	transcript	XM_022425379.1	protein_coding	10	c.-103-78321A>G
11	29579921	T	C	GATKstd	intron_variant	MODIFIER	PTPRD	481538	transcript	XM_022425380.1	protein_coding	10	c.-103-78321A>G
11	29579921	T	C	GATKstd	intron_variant	MODIFIER	PTPRD	481538	transcript	XM_022425383.1	protein_coding	10	c.-103-78321A>G
11	29579921	T	C	GATKstd	intron_variant	MODIFIER	PTPRD	481538	transcript	XM_022425384.1	protein_coding	10	c.-103-78321A>G
11	29579921	T	C	GATKstd	intron_variant	MODIFIER	PTPRD	481538	transcript	XM_022425385.1	protein_coding	10	c.-103-78321A>G
11	29579921	T	C	GATKstd	intron_variant	MODIFIER	PTPRD	481538	transcript	XM_022425386.1	protein_coding	10	c.-103-78321A>G
11	29579921	T	C	GATKstd	intron_variant	MODIFIER	PTPRD	481538	transcript	XM_022425387.1	protein_coding	10	c.-103-78321A>G
11	29579921	T	C	GATKstd	intron_variant	MODIFIER	PTPRD	481538	transcript	XM_022425388.1	protein_coding	10	c.-103-78321A>G
11	29579921	T	C	GATKstd	intron_variant	MODIFIER	PTPRD	481538	transcript	XM_022425389.1	protein_coding	10	c.-103-78321A>G
11	29579921	T	C	GATKstd	intron_variant	MODIFIER	PTPRD	481538	transcript	XM_022425390.1	protein_coding	10	c.-103-78321A>G
11	29579921	T	C	GATKstd	intron_variant	MODIFIER	PTPRD	481538	transcript	XM_022425391.1	protein_coding	10	c.-103-78321A>G
11	29579921	T	C	GATKstd	intron_variant	MODIFIER	PTPRD	481538	transcript	XM_022425392.1	protein_coding	10	c.-103-78321A>G
11	29579921	T	C	GATKstd	intron_variant	MODIFIER	PTPRD	481538	transcript	XM_022425393.1	protein_coding	10	c.-103-78321A>G
11	29579921	T	C	GATKstd	intron_variant	MODIFIER	PTPRD	481538	transcript	XM_022425394.1	protein_coding	10	c.-103-78321A>G
11	29579921	T	C	GATKstd	intron_variant	MODIFIER	PTPRD	481538	transcript	XM_022425395.1	protein_coding	10	c.-103-78321A>G
11	29579921	T	C	GATKstd	intron_variant	MODIFIER	PTPRD	481538	transcript	XM_022425396.1	protein_coding	10	c.-103-78321A>G
11	29579921	T	C	GATKstd	intron_variant	MODIFIER	PTPRD	481538	transcript	XM_022425397.1	protein_coding	10	c.-103-78321A>G
11	29579921	T	C	GATKstd	intron_variant	MODIFIER	PTPRD	481538	transcript	XM_022425399.1	protein_coding	10	c.-103-78321A>G
11	29579921	T	C	GATKstd	intron_variant	MODIFIER	PTPRD	481538	transcript	XM_022425401.1	protein_coding	10	c.-103-78321A>G
11	29579921	T	C	GATKstd	intron_variant	MODIFIER	PTPRD	481538	transcript	XM_022425402.1	protein_coding	10	c.-103-78321A>G
11	29579921	T	C	GATKstd	intron_variant	MODIFIER	PTPRD	481538	transcript	XM_022425403.1	protein_coding	10	c.-103-78321A>G
11	29579921	T	C	GATKstd	intron_variant	MODIFIER	PTPRD	481538	transcript	XM_022425404.1	protein_coding	10	c.-103-78321A>G
11	29579921	T	C	GATKstd	intron_variant	MODIFIER	PTPRD	481538	transcript	XM_022425381.1	protein_coding	10	c.-103-78321A>G
11	29579921	T	C	GATKstd	intron_variant	MODIFIER	PTPRD	481538	transcript	XM_022425382.1	protein_coding	10	c.-103-78321A>G
11	30181971	C	A	GATKstd	intron_variant	MODIFIER	PTPRD	481538	transcript	XM_022425377.1	protein_coding	7	c.-231-85275G>T
11	30181971	C	A	GATKstd	intron_variant	MODIFIER	PTPRD	481538	transcript	XM_014117756.2	protein_coding	7	c.-231-85275G>T
11	30181971	C	A	GATKstd	intron_variant	MODIFIER	PTPRD	481538	transcript	XM_014117757.2	protein_coding	7	c.-231-85275G>T
11	30181971	C	A	GATKstd	intron_variant	MODIFIER	PTPRD	481538	transcript	XM_022425406.1	protein_coding	7	c.-231-85275G>T
11	30181971	C	A	GATKstd	intron_variant	MODIFIER	PTPRD	481538	transcript	XM_022425407.1	protein_coding	7	c.-231-85275G>T
11	30181971	C	A	GATKstd	intron_variant	MODIFIER	PTPRD	481538	transcript	XM_022425408.1	protein_coding	7	c.-231-85275G>T
11	30181971	C	A	GATKstd	intron_variant	MODIFIER	PTPRD	481538	transcript	XM_022425409.1	protein_coding	7	c.-231-85275G>T
11	30181971	C	A	GATKstd	intron_variant	MODIFIER	PTPRD	481538	transcript	XM_022425410.1	protein_coding	7	c.-231-85275G>T
11	30181971	C	A	GATKstd	intron_variant	MODIFIER	PTPRD	481538	transcript	XM_022425411.1	protein_coding	7	c.-231-85275G>T
11	30181971	C	A	GATKstd	intron_variant	MODIFIER	PTPRD	481538	transcript	XM_022425412.1	protein_coding	7	c.-231-85275G>T
11	30181971	C	A	GATKstd	intron_variant	MODIFIER	PTPRD	481538	transcript	XM_022425413.1	protein_coding	7	c.-231-85275G>T
11	30181971	C	A	GATKstd	intron_variant	MODIFIER	PTPRD	481538	transcript	XM_022425398.1	protein_coding	7	c.-231-85275G>T
11	30181971	C	A	GATKstd	intron_variant	MODIFIER	PTPRD	481538	transcript	XM_022425400.1	protein_coding	7	c.-231-85275G>T
11	30181971	C	A	GATKstd	intron_variant	MODIFIER	PTPRD	481538	transcript	XM_022425405.1	protein_coding	7	c.-231-85275G>T
11	30181971	C	A	GATKstd	intron_variant	MODIFIER	PTPRD	481538	transcript	XM_022425414.1	protein_coding	7	c.-231-85275G>T
11	30181971	C	A	GATKstd	intron_variant	MODIFIER	PTPRD	481538	transcript	XM_005626620.3	protein_coding	7	c.-231-85275G>T
11	30181971	C	A	GATKstd	intron_variant	MODIFIER	PTPRD	481538	transcript	XM_014117752.2	protein_coding	7	c.-231-85275G>T
11	30181971	C	A	GATKstd	intron_variant	MODIFIER	PTPRD	481538	transcript	XM_014117753.2	protein_coding	7	c.-231-85275G>T
11	30181971	C	A	GATKstd	intron_variant	MODIFIER	PTPRD	481538	transcript	XM_022425378.1	protein_coding	6	c.-231-85275G>T
11	30181971	C	A	GATKstd	intron_variant	MODIFIER	PTPRD	481538	transcript	XM_022425379.1	protein_coding	7	c.-231-85275G>T
11	30181971	C	A	GATKstd	intron_variant	MODIFIER	PTPRD	481538	transcript	XM_022425380.1	protein_coding	7	c.-231-85275G>T
11	30181971	C	A	GATKstd	intron_variant	MODIFIER	PTPRD	481538	transcript	XM_022425383.1	protein_coding	7	c.-231-85275G>T
11	30181971	C	A	GATKstd	intron_variant	MODIFIER	PTPRD	481538	transcript	XM_022425384.1	protein_coding	7	c.-231-85275G>T
11	30181971	C	A	GATKstd	intron_variant	MODIFIER	PTPRD	481538	transcript	XM_022425385.1	protein_coding	7	c.-231-85275G>T
11	30181971	C	A	GATKstd	intron_variant	MODIFIER	PTPRD	481538	transcript	XM_022425386.1	protein_coding	7	c.-231-85275G>T
11	30181971	C	A	GATKstd	intron_variant	MODIFIER	PTPRD	481538	transcript	XM_022425387.1	protein_coding	7	c.-231-85275G>T
11	30181971	C	A	GATKstd	intron_variant	MODIFIER	PTPRD	481538	transcript	XM_022425388.1	protein_coding	7	c.-231-85275G>T
11	30181971	C	A	GATKstd	intron_variant	MODIFIER	PTPRD	481538	transcript	XM_022425389.1	protein_coding	7	c.-231-85275G>T
11	30181971	C	A	GATKstd	intron_variant	MODIFIER	PTPRD	481538	transcript	XM_022425390.1	protein_coding	7	c.-231-85275G>T
11	30181971	C	A	GATKstd	intron_variant	MODIFIER	PTPRD	481538	transcript	XM_022425391.1	protein_coding	7	c.-231-85275G>T
11	30181971	C	A	GATKstd	intron_variant	MODIFIER	PTPRD	481538	transcript	XM_022425392.1	protein_coding	7	c.-231-85275G>T
11	30181971	C	A	GATKstd	intron_variant	MODIFIER	PTPRD	481538	transcript	XM_022425393.1	protein_coding	7	c.-231-85275G>T
11	30181971	C	A	GATKstd	intron_variant	MODIFIER	PTPRD	481538	transcript	XM_022425394.1	protein_coding	7	c.-231-85275G>T
11	30181971	C	A	GATKstd	intron_variant	MODIFIER	PTPRD	481538	transcript	XM_022425395.1	protein_coding	7	c.-231-85275G>T
11	30181971	C	A	GATKstd	intron_variant	MODIFIER	PTPRD	481538	transcript	XM_022425396.1	protein_coding	7	c.-231-85275G>T
11	30181971	C	A	GATKstd	intron_variant	MODIFIER	PTPRD	481538	transcript	XM_022425397.1	protein_coding	7	c.-231-85275G>T
11	30181971	C	A	GATKstd	intron_variant	MODIFIER	PTPRD	481538	transcript	XM_022425399.1	protein_coding	7	c.-231-85275G>T
11	30181971	C	A	GATKstd	intron_variant	MODIFIER	PTPRD	481538	transcript	XM_022425401.1	protein_coding	7	c.-231-85275G>T
11	30181971	C	A	GATKstd	intron_variant	MODIFIER	PTPRD	481538	transcript	XM_022425402.1	protein_coding	7	c.-231-85275G>T
11	30181971	C	A	GATKstd	intron_variant	MODIFIER	PTPRD	481538	transcript	XM_022425403.1	protein_coding	7	c.-231-85275G>T
11	30181971	C	A	GATKstd	intron_variant	MODIFIER	PTPRD	481538	transcript	XM_022425404.1	protein_coding	7	c.-231-85275G>T
11	30181971	C	A	GATKstd	intron_variant	MODIFIER	PTPRD	481538	transcript	XM_022425381.1	protein_coding	7	c.-231-85275G>T
11	30181971	C	A	GATKstd	intron_variant	MODIFIER	PTPRD	481538	transcript	XM_022425382.1	protein_coding	7	c.-231-85275G>T
11	30183629	C	A	GATKstd	intron_variant	MODIFIER	PTPRD	481538	transcript	XM_022425377.1	protein_coding	7	c.-231-86933G>T
11	30183629	C	A	GATKstd	intron_variant	MODIFIER	PTPRD	481538	transcript	XM_014117756.2	protein_coding	7	c.-231-86933G>T
11	30183629	C	A	GATKstd	intron_variant	MODIFIER	PTPRD	481538	transcript	XM_014117757.2	protein_coding	7	c.-231-86933G>T
11	30183629	C	A	GATKstd	intron_variant	MODIFIER	PTPRD	481538	transcript	XM_022425406.1	protein_coding	7	c.-231-86933G>T
11	30183629	C	A	GATKstd	intron_variant	MODIFIER	PTPRD	481538	transcript	XM_022425407.1	protein_coding	7	c.-231-86933G>T
11	30183629	C	A	GATKstd	intron_variant	MODIFIER	PTPRD	481538	transcript	XM_022425408.1	protein_coding	7	c.-231-86933G>T
11	30183629	C	A	GATKstd	intron_variant	MODIFIER	PTPRD	481538	transcript	XM_022425409.1	protein_coding	7	c.-231-86933G>T
11	30183629	C	A	GATKstd	intron_variant	MODIFIER	PTPRD	481538	transcript	XM_022425410.1	protein_coding	7	c.-231-86933G>T
11	30183629	C	A	GATKstd	intron_variant	MODIFIER	PTPRD	481538	transcript	XM_022425411.1	protein_coding	7	c.-231-86933G>T
11	30183629	C	A	GATKstd	intron_variant	MODIFIER	PTPRD	481538	transcript	XM_022425412.1	protein_coding	7	c.-231-86933G>T
11	30183629	C	A	GATKstd	intron_variant	MODIFIER	PTPRD	481538	transcript	XM_022425413.1	protein_coding	7	c.-231-86933G>T
11	30183629	C	A	GATKstd	intron_variant	MODIFIER	PTPRD	481538	transcript	XM_022425398.1	protein_coding	7	c.-231-86933G>T
11	30183629	C	A	GATKstd	intron_variant	MODIFIER	PTPRD	481538	transcript	XM_022425400.1	protein_coding	7	c.-231-86933G>T
11	30183629	C	A	GATKstd	intron_variant	MODIFIER	PTPRD	481538	transcript	XM_022425405.1	protein_coding	7	c.-231-86933G>T
11	30183629	C	A	GATKstd	intron_variant	MODIFIER	PTPRD	481538	transcript	XM_022425414.1	protein_coding	7	c.-231-86933G>T
11	30183629	C	A	GATKstd	intron_variant	MODIFIER	PTPRD	481538	transcript	XM_005626620.3	protein_coding	7	c.-231-86933G>T
11	30183629	C	A	GATKstd	intron_variant	MODIFIER	PTPRD	481538	transcript	XM_014117752.2	protein_coding	7	c.-231-86933G>T
11	30183629	C	A	GATKstd	intron_variant	MODIFIER	PTPRD	481538	transcript	XM_014117753.2	protein_coding	7	c.-231-86933G>T
11	30183629	C	A	GATKstd	intron_variant	MODIFIER	PTPRD	481538	transcript	XM_022425378.1	protein_coding	6	c.-231-86933G>T
11	30183629	C	A	GATKstd	intron_variant	MODIFIER	PTPRD	481538	transcript	XM_022425379.1	protein_coding	7	c.-231-86933G>T
11	30183629	C	A	GATKstd	intron_variant	MODIFIER	PTPRD	481538	transcript	XM_022425380.1	protein_coding	7	c.-231-86933G>T
11	30183629	C	A	GATKstd	intron_variant	MODIFIER	PTPRD	481538	transcript	XM_022425383.1	protein_coding	7	c.-231-86933G>T
11	30183629	C	A	GATKstd	intron_variant	MODIFIER	PTPRD	481538	transcript	XM_022425384.1	protein_coding	7	c.-231-86933G>T
11	30183629	C	A	GATKstd	intron_variant	MODIFIER	PTPRD	481538	transcript	XM_022425385.1	protein_coding	7	c.-231-86933G>T
11	30183629	C	A	GATKstd	intron_variant	MODIFIER	PTPRD	481538	transcript	XM_022425386.1	protein_coding	7	c.-231-86933G>T
11	30183629	C	A	GATKstd	intron_variant	MODIFIER	PTPRD	481538	transcript	XM_022425387.1	protein_coding	7	c.-231-86933G>T
11	30183629	C	A	GATKstd	intron_variant	MODIFIER	PTPRD	481538	transcript	XM_022425388.1	protein_coding	7	c.-231-86933G>T
11	30183629	C	A	GATKstd	intron_variant	MODIFIER	PTPRD	481538	transcript	XM_022425389.1	protein_coding	7	c.-231-86933G>T
11	30183629	C	A	GATKstd	intron_variant	MODIFIER	PTPRD	481538	transcript	XM_022425390.1	protein_coding	7	c.-231-86933G>T
11	30183629	C	A	GATKstd	intron_variant	MODIFIER	PTPRD	481538	transcript	XM_022425391.1	protein_coding	7	c.-231-86933G>T
11	30183629	C	A	GATKstd	intron_variant	MODIFIER	PTPRD	481538	transcript	XM_022425392.1	protein_coding	7	c.-231-86933G>T
11	30183629	C	A	GATKstd	intron_variant	MODIFIER	PTPRD	481538	transcript	XM_022425393.1	protein_coding	7	c.-231-86933G>T
11	30183629	C	A	GATKstd	intron_variant	MODIFIER	PTPRD	481538	transcript	XM_022425394.1	protein_coding	7	c.-231-86933G>T
11	30183629	C	A	GATKstd	intron_variant	MODIFIER	PTPRD	481538	transcript	XM_022425395.1	protein_coding	7	c.-231-86933G>T
11	30183629	C	A	GATKstd	intron_variant	MODIFIER	PTPRD	481538	transcript	XM_022425396.1	protein_coding	7	c.-231-86933G>T
11	30183629	C	A	GATKstd	intron_variant	MODIFIER	PTPRD	481538	transcript	XM_022425397.1	protein_coding	7	c.-231-86933G>T
11	30183629	C	A	GATKstd	intron_variant	MODIFIER	PTPRD	481538	transcript	XM_022425399.1	protein_coding	7	c.-231-86933G>T
11	30183629	C	A	GATKstd	intron_variant	MODIFIER	PTPRD	481538	transcript	XM_022425401.1	protein_coding	7	c.-231-86933G>T
11	30183629	C	A	GATKstd	intron_variant	MODIFIER	PTPRD	481538	transcript	XM_022425402.1	protein_coding	7	c.-231-86933G>T
11	30183629	C	A	GATKstd	intron_variant	MODIFIER	PTPRD	481538	transcript	XM_022425403.1	protein_coding	7	c.-231-86933G>T
11	30183629	C	A	GATKstd	intron_variant	MODIFIER	PTPRD	481538	transcript	XM_022425404.1	protein_coding	7	c.-231-86933G>T
11	30183629	C	A	GATKstd	intron_variant	MODIFIER	PTPRD	481538	transcript	XM_022425381.1	protein_coding	7	c.-231-86933G>T
11	30183629	C	A	GATKstd	intron_variant	MODIFIER	PTPRD	481538	transcript	XM_022425382.1	protein_coding	7	c.-231-86933G>T
11	30951418	T	C	GATKstd	intron_variant	MODIFIER	PTPRD	481538	transcript	XM_022425377.1	protein_coding	2	c.-545+61670A>G
11	30951418	T	C	GATKstd	intron_variant	MODIFIER	PTPRD	481538	transcript	XM_014117756.2	protein_coding	2	c.-545+61670A>G
11	30951418	T	C	GATKstd	intron_variant	MODIFIER	PTPRD	481538	transcript	XM_014117757.2	protein_coding	2	c.-545+61670A>G
11	30951418	T	C	GATKstd	intron_variant	MODIFIER	PTPRD	481538	transcript	XM_022425406.1	protein_coding	2	c.-545+61670A>G
11	30951418	T	C	GATKstd	intron_variant	MODIFIER	PTPRD	481538	transcript	XM_022425407.1	protein_coding	2	c.-545+61670A>G
11	30951418	T	C	GATKstd	intron_variant	MODIFIER	PTPRD	481538	transcript	XM_022425408.1	protein_coding	2	c.-545+61670A>G
11	30951418	T	C	GATKstd	intron_variant	MODIFIER	PTPRD	481538	transcript	XM_022425409.1	protein_coding	2	c.-545+61670A>G
11	30951418	T	C	GATKstd	intron_variant	MODIFIER	PTPRD	481538	transcript	XM_022425410.1	protein_coding	2	c.-545+61670A>G
11	30951418	T	C	GATKstd	intron_variant	MODIFIER	PTPRD	481538	transcript	XM_022425411.1	protein_coding	2	c.-545+61670A>G
11	30951418	T	C	GATKstd	intron_variant	MODIFIER	PTPRD	481538	transcript	XM_022425412.1	protein_coding	2	c.-545+61670A>G
11	30951418	T	C	GATKstd	intron_variant	MODIFIER	PTPRD	481538	transcript	XM_022425413.1	protein_coding	2	c.-545+61670A>G
11	30951418	T	C	GATKstd	intron_variant	MODIFIER	PTPRD	481538	transcript	XM_022425398.1	protein_coding	2	c.-545+61670A>G
11	30951418	T	C	GATKstd	intron_variant	MODIFIER	PTPRD	481538	transcript	XM_022425400.1	protein_coding	2	c.-545+61670A>G
11	30951418	T	C	GATKstd	intron_variant	MODIFIER	PTPRD	481538	transcript	XM_022425405.1	protein_coding	2	c.-545+61670A>G
11	30951418	T	C	GATKstd	intron_variant	MODIFIER	PTPRD	481538	transcript	XM_022425414.1	protein_coding	2	c.-545+61670A>G
11	30951418	T	C	GATKstd	intron_variant	MODIFIER	PTPRD	481538	transcript	XM_005626620.3	protein_coding	2	c.-545+61670A>G
11	30951418	T	C	GATKstd	intron_variant	MODIFIER	PTPRD	481538	transcript	XM_014117752.2	protein_coding	2	c.-545+61670A>G
11	30951418	T	C	GATKstd	intron_variant	MODIFIER	PTPRD	481538	transcript	XM_014117753.2	protein_coding	2	c.-545+61670A>G
11	30951418	T	C	GATKstd	intron_variant	MODIFIER	PTPRD	481538	transcript	XM_022425378.1	protein_coding	1	c.-544-238909A>G
11	30951418	T	C	GATKstd	intron_variant	MODIFIER	PTPRD	481538	transcript	XM_022425379.1	protein_coding	2	c.-545+61670A>G
11	30951418	T	C	GATKstd	intron_variant	MODIFIER	PTPRD	481538	transcript	XM_022425380.1	protein_coding	2	c.-545+61670A>G
11	30951418	T	C	GATKstd	intron_variant	MODIFIER	PTPRD	481538	transcript	XM_022425383.1	protein_coding	2	c.-545+61670A>G
11	30951418	T	C	GATKstd	intron_variant	MODIFIER	PTPRD	481538	transcript	XM_022425384.1	protein_coding	2	c.-545+61670A>G
11	30951418	T	C	GATKstd	intron_variant	MODIFIER	PTPRD	481538	transcript	XM_022425385.1	protein_coding	2	c.-545+61670A>G
11	30951418	T	C	GATKstd	intron_variant	MODIFIER	PTPRD	481538	transcript	XM_022425386.1	protein_coding	2	c.-545+61670A>G
11	30951418	T	C	GATKstd	intron_variant	MODIFIER	PTPRD	481538	transcript	XM_022425387.1	protein_coding	2	c.-545+61670A>G
11	30951418	T	C	GATKstd	intron_variant	MODIFIER	PTPRD	481538	transcript	XM_022425388.1	protein_coding	2	c.-545+61670A>G
11	30951418	T	C	GATKstd	intron_variant	MODIFIER	PTPRD	481538	transcript	XM_022425389.1	protein_coding	2	c.-545+61670A>G
11	30951418	T	C	GATKstd	intron_variant	MODIFIER	PTPRD	481538	transcript	XM_022425390.1	protein_coding	2	c.-545+61670A>G
11	30951418	T	C	GATKstd	intron_variant	MODIFIER	PTPRD	481538	transcript	XM_022425391.1	protein_coding	2	c.-545+61670A>G
11	30951418	T	C	GATKstd	intron_variant	MODIFIER	PTPRD	481538	transcript	XM_022425392.1	protein_coding	2	c.-545+61670A>G
11	30951418	T	C	GATKstd	intron_variant	MODIFIER	PTPRD	481538	transcript	XM_022425393.1	protein_coding	2	c.-545+61670A>G
11	30951418	T	C	GATKstd	intron_variant	MODIFIER	PTPRD	481538	transcript	XM_022425394.1	protein_coding	2	c.-545+61670A>G
11	30951418	T	C	GATKstd	intron_variant	MODIFIER	PTPRD	481538	transcript	XM_022425395.1	protein_coding	2	c.-545+61670A>G
11	30951418	T	C	GATKstd	intron_variant	MODIFIER	PTPRD	481538	transcript	XM_022425396.1	protein_coding	2	c.-545+61670A>G
11	30951418	T	C	GATKstd	intron_variant	MODIFIER	PTPRD	481538	transcript	XM_022425397.1	protein_coding	2	c.-545+61670A>G
11	30951418	T	C	GATKstd	intron_variant	MODIFIER	PTPRD	481538	transcript	XM_022425399.1	protein_coding	2	c.-545+61670A>G
11	30951418	T	C	GATKstd	intron_variant	MODIFIER	PTPRD	481538	transcript	XM_022425401.1	protein_coding	2	c.-545+61670A>G
11	30951418	T	C	GATKstd	intron_variant	MODIFIER	PTPRD	481538	transcript	XM_022425402.1	protein_coding	2	c.-545+61670A>G
11	30951418	T	C	GATKstd	intron_variant	MODIFIER	PTPRD	481538	transcript	XM_022425403.1	protein_coding	2	c.-545+61670A>G
11	30951418	T	C	GATKstd	intron_variant	MODIFIER	PTPRD	481538	transcript	XM_022425404.1	protein_coding	2	c.-545+61670A>G
11	30951418	T	C	GATKstd	intron_variant	MODIFIER	PTPRD	481538	transcript	XM_022425381.1	protein_coding	2	c.-545+61670A>G
11	30951418	T	C	GATKstd	intron_variant	MODIFIER	PTPRD	481538	transcript	XM_022425382.1	protein_coding	2	c.-545+61670A>G
11	32253864	T	TA	PASS	intergenic_region	MODIFIER	LOC481540-LOC100684799	481540-100684799	intergenic_region	481540-100684799		-1	n.32253864_32253865insA
11	32508339	C	CCAGTCAATTACTTTG	PASS	intron_variant	MODIFIER	LOC100684799	100684799	transcript	100684799	pseudogene	1	n.21+45160_21+45161insCAGTCAATTACTTTG
11	33106357	G	GAAAAAAAAA	GATKIndelStd	intergenic_region	MODIFIER	LOC100684947-TYRP1	100684947-403479	intergenic_region	100684947-403479		-1	n.33106357_33106358insAAAAAAAAA
11	33464883	T	C	GATKstd	intron_variant	MODIFIER	LOC111098040	111098040	transcript	XR_002631421.1	pseudogene	1	n.101+8943A>G
11	34268726	C	T	PASS	intergenic_region	MODIFIER	LOC111097936-LOC111098044	111097936-111098044	intergenic_region	111097936-111098044		-1	n.34268726C>T
11	35072219	C	A	PASS	downstream_gene_variant	MODIFIER	ZDHHC21	481546	transcript	XM_014117767.2	protein_coding	-1	c.*7678G>T
11	35072219	C	A	PASS	intergenic_region	MODIFIER	NFIB-ZDHHC21	474709-481546	intergenic_region	474709-481546		-1	n.35072219C>A
11	35807310	C	G	GATKstd	intergenic_region	MODIFIER	PSIP1-CCDC171	474712-474713	intergenic_region	474712-474713		-1	n.35807310C>G
11	38040911	T	C	PASS	intron_variant	MODIFIER	ADAMTSL1	474717	transcript	XM_005626657.3	protein_coding	1	c.88-87183T>C
11	38040911	T	C	PASS	intron_variant	MODIFIER	ADAMTSL1	474717	transcript	XM_022425469.1	protein_coding	1	c.88-87183T>C
11	38040911	T	C	PASS	intron_variant	MODIFIER	ADAMTSL1	474717	transcript	XM_014117786.2	protein_coding	1	c.88-87183T>C
11	38511929	C	T	GATKstd	intron_variant	MODIFIER	ADAMTSL1	474717	transcript	XM_005626657.3	protein_coding	6	c.746-594C>T
11	38511929	C	T	GATKstd	intron_variant	MODIFIER	ADAMTSL1	474717	transcript	XM_022425469.1	protein_coding	6	c.746-594C>T
11	38511929	C	T	GATKstd	intron_variant	MODIFIER	ADAMTSL1	474717	transcript	XM_014117786.2	protein_coding	6	c.746-594C>T
11	38511929	C	T	GATKstd	intron_variant	MODIFIER	ADAMTSL1	474717	transcript	XM_531943.6	protein_coding	5	c.602-594C>T
11	38541171	T	C	GATKstd	intron_variant	MODIFIER	ADAMTSL1	474717	transcript	XM_005626657.3	protein_coding	11	c.1280+2227T>C
11	38541171	T	C	GATKstd	intron_variant	MODIFIER	ADAMTSL1	474717	transcript	XM_022425469.1	protein_coding	11	c.1280+2227T>C
11	38541171	T	C	GATKstd	intron_variant	MODIFIER	ADAMTSL1	474717	transcript	XM_014117786.2	protein_coding	10	c.1230-2298T>C
11	38541171	T	C	GATKstd	intron_variant	MODIFIER	ADAMTSL1	474717	transcript	XM_531943.6	protein_coding	10	c.1136+2227T>C
11	38944176	ATCTTG	A	PASS	intron_variant	MODIFIER	PLIN2	100856329	transcript	XM_005626663.3	protein_coding	9	c.1204-3708_1204-3704delCAAGA
11	38944176	ATCTTG	A	PASS	intron_variant	MODIFIER	PLIN2	100856329	transcript	XR_293573.3	pseudogene	10	n.1531-3708_1531-3704delCAAGA
11	40090506	T	A	GATKstd	intron_variant	MODIFIER	MLLT3	481556	transcript	XM_538677.6	protein_coding	2	c.194-44665A>T
11	40090506	T	A	GATKstd	intron_variant	MODIFIER	MLLT3	481556	transcript	XM_014117789.2	protein_coding	2	c.185-44665A>T
11	40090506	T	A	GATKstd	intron_variant	MODIFIER	MLLT3	481556	transcript	XM_022425476.1	protein_coding	2	c.194-44665A>T
11	40832830	T	G	GATKstd	intergenic_region	MODIFIER	LOC611406-IFNA7	611406-474181	intergenic_region	611406-474181		-1	n.40832830T>G
11	44276553	A	AGGGATCCCTGGGTGGCGCAGGGGTTTGGCGCCTGCCTTTGGCCCAGGGCGC	PASS	intron_variant	MODIFIER	LOC111098070	111098070	transcript	XR_002631495.1	pseudogene	7	n.1125-27652_1125-27651insGCGCCCTGGGCCAAAGGCAGGCGCCAAACCCCTGCGCCACCCAGGGATCCC
11	44276553	A	AGGGATCCCTGGGTGGCGCAGGGGTTTGGCGCCTGCCTTTGGCCCAGGGCGC	PASS	intron_variant	MODIFIER	LOC111098070	111098070	transcript	XR_002631494.1	pseudogene	6	n.728-6953_728-6952insGCGCCCTGGGCCAAAGGCAGGCGCCAAACCCCTGCGCCACCCAGGGATCCC
11	44276553	A	AGGGATCCCTGGGTGGCGCAGGGGTTTGGCGCCTGCCTTTGGCCCAGGGCGC	PASS	intron_variant	MODIFIER	LOC111098070	111098070	transcript	XR_002631496.1	pseudogene	6	n.728-19245_728-19244insGCGCCCTGGGCCAAAGGCAGGCGCCAAACCCCTGCGCCACCCAGGGATCCC
11	44276553	A	AGGGATCCCTGGGTGGCGCAGGGGTTTGGCGCCTGCCTTTGGCCCAGGGCGC	PASS	intron_variant	MODIFIER	LOC111098070	111098070	transcript	XR_002631493.1	pseudogene	6	n.728-27652_728-27651insGCGCCCTGGGCCAAAGGCAGGCGCCAAACCCCTGCGCCACCCAGGGATCCC
11	46899361	T	A	GATKstd	intron_variant	MODIFIER	LINGO2	481570	transcript	XM_014117801.2	protein_coding	1	c.-502-3847A>T
11	46899361	T	A	GATKstd	intron_variant	MODIFIER	LINGO2	481570	transcript	XM_014117803.2	protein_coding	1	c.-401+215828A>T
11	46899361	T	A	GATKstd	intron_variant	MODIFIER	LINGO2	481570	transcript	XM_022425494.1	protein_coding	2	c.-502-3847A>T
11	46899361	T	A	GATKstd	intron_variant	MODIFIER	LINGO2	481570	transcript	XM_022425496.1	protein_coding	2	c.-469-3847A>T
11	46899361	T	A	GATKstd	intron_variant	MODIFIER	LINGO2	481570	transcript	XM_022425497.1	protein_coding	2	c.-618-3847A>T
11	46899361	T	A	GATKstd	intron_variant	MODIFIER	LINGO2	481570	transcript	XM_538692.6	protein_coding	1	c.-502-3847A>T
11	46899368	C	A	GATKstd	intron_variant	MODIFIER	LINGO2	481570	transcript	XM_014117801.2	protein_coding	1	c.-502-3854G>T
11	46899368	C	A	GATKstd	intron_variant	MODIFIER	LINGO2	481570	transcript	XM_014117803.2	protein_coding	1	c.-401+215821G>T
11	46899368	C	A	GATKstd	intron_variant	MODIFIER	LINGO2	481570	transcript	XM_022425494.1	protein_coding	2	c.-502-3854G>T
11	46899368	C	A	GATKstd	intron_variant	MODIFIER	LINGO2	481570	transcript	XM_022425496.1	protein_coding	2	c.-469-3854G>T
11	46899368	C	A	GATKstd	intron_variant	MODIFIER	LINGO2	481570	transcript	XM_022425497.1	protein_coding	2	c.-618-3854G>T
11	46899368	C	A	GATKstd	intron_variant	MODIFIER	LINGO2	481570	transcript	XM_538692.6	protein_coding	1	c.-502-3854G>T
11	47845979	TAGAA	T	PASS	intergenic_region	MODIFIER	LOC106559530-LOC100855832	106559530-100855832	intergenic_region	106559530-100855832		-1	n.47845980_47845983delAGAA
11	47845987	TCA	T	PASS	intergenic_region	MODIFIER	LOC106559530-LOC100855832	106559530-100855832	intergenic_region	106559530-100855832		-1	n.47845988_47845989delCA
11	47993225	A	G	GATKstd	intergenic_region	MODIFIER	LOC106559530-LOC100855832	106559530-100855832	intergenic_region	106559530-100855832		-1	n.47993225A>G
11	48646167	T	A	GATKstd	intergenic_region	MODIFIER	LOC111097947-LOC111098079	111097947-111098079	intergenic_region	111097947-111098079		-1	n.48646167T>A
11	48646171	T	A	PASS	intergenic_region	MODIFIER	LOC111097947-LOC111098079	111097947-111098079	intergenic_region	111097947-111098079		-1	n.48646171T>A
11	48646177	C	A	GATKstd	intergenic_region	MODIFIER	LOC111097947-LOC111098079	111097947-111098079	intergenic_region	111097947-111098079		-1	n.48646177C>A
11	50365947	ATCTT	A	PASS	upstream_gene_variant	MODIFIER	BAG1	611781	transcript	XM_005626987.2	protein_coding	-1	c.-2419_-2416delAAGA
11	50365947	ATCTT	A	PASS	intron_variant	MODIFIER	CHMP5	474741	transcript	XM_531972.6	protein_coding	2	c.175-178_175-175delTCTT
11	50693813	A	G	GATKstd	upstream_gene_variant	MODIFIER	UBAP2	481583	transcript	XM_022425509.1	protein_coding	-1	c.-7668T>C
11	50693813	A	G	GATKstd	upstream_gene_variant	MODIFIER	UBAP2	481583	transcript	XM_022425510.1	protein_coding	-1	c.-7668T>C
11	50693813	A	G	GATKstd	intron_variant	MODIFIER	UBAP2	481583	transcript	XM_005626712.3	protein_coding	15	c.1933+1424T>C
11	50693813	A	G	GATKstd	intron_variant	MODIFIER	UBAP2	481583	transcript	XM_022425507.1	protein_coding	14	c.1522+1424T>C
11	50693813	A	G	GATKstd	intron_variant	MODIFIER	UBAP2	481583	transcript	XM_014117812.2	protein_coding	16	c.1903+1424T>C
11	50693813	A	G	GATKstd	intron_variant	MODIFIER	UBAP2	481583	transcript	XM_022425504.1	protein_coding	16	c.1903+1424T>C
11	50693813	A	G	GATKstd	intron_variant	MODIFIER	UBAP2	481583	transcript	XM_005626711.3	protein_coding	16	c.1903+1424T>C
[truncated: 18,189 more rows]
